# Supplementary material for: Ruthenafuran Complexes Supported by the Bipyridine-Bis(diphenylphosphino)methane Ligand Set: Synthesis and Cytotoxicity Studies
Source: MDPI journal article supplement (doi:10.3390/molecules27051709), 2022-03-05
Supplement: s1 [file s1]

## **Supplementary Materials**

for

### **Ruthenafuran Complexes Supported by the Bipyridine-Bis(diphenylphosphino)methane Ligand Set: Synthesis and Cytotoxicity Studies**

Chi-Fung Yeung <sup>1,2,†</sup>, Sik-Him Tang <sup>1,†</sup>, Zhe Yang <sup>1,†</sup>, Tsun-Yin Li <sup>1</sup>, Ka-Kit Li <sup>1</sup>, Yuen-Man Chan <sup>1</sup>,  
Hau-Lam Shek <sup>1</sup>, Kai-Wa Io <sup>1</sup>, King-Ting Tam <sup>1</sup>, Shek-Man Yiu <sup>1</sup>, Man-Kit Tse <sup>1</sup> and Chun-Yuen  
Wong <sup>1,2,\*</sup>

<sup>1</sup> Department of Chemistry, City University of Hong Kong, Tat Chee Avenue, Kowloon, Hong Kong

<sup>2</sup> State Key Laboratory of Terahertz and Millimeter Waves, City University of Hong Kong, Tat Chee Avenue, Kowloon, Hong Kong

\* Correspondence: acywong@cityu.edu.hk; Tel.: +852-3442-6831

† These authors contributed equally to this work.

| Table of Contents                                                     |         |
|-----------------------------------------------------------------------|---------|
|                                                                       | Page    |
| NMR spectra of complex <b>1</b>                                       | S3–S11  |
| NMR spectra of complex <b>2</b>                                       | S12–S20 |
| NMR spectra of complex <b>[3]</b> (OTf) <sub>2</sub>                  | S21–S26 |
| NMR spectra of complex <b>[4]</b> (OTf)                               | S27–S35 |
| NMR spectra of complex <b>[5]</b> (OTf)                               | S36–S44 |
| NMR spectra of complex <b>[6]</b> (OTf)                               | S45–S53 |
| NMR spectra of complex <b>[7]</b> (OTf)                               | S54–S62 |
| NMR spectra of complex <b>[8]</b> (OTf)                               | S63–S71 |
| Experimental and simulated mass spectra of <b>[1–Cl]</b> <sup>+</sup> | S72–S73 |
| Experimental and simulated mass spectra of <b>[2–Cl]</b> <sup>+</sup> | S74–S75 |
| Experimental and simulated mass spectra of <b>[3]</b> <sup>2+</sup>   | S76–S77 |
| Experimental and simulated mass spectra of <b>[4]</b> <sup>+</sup>    | S78–S79 |
| Experimental and simulated mass spectra of <b>[5]</b> <sup>+</sup>    | S80–S81 |
| Experimental and simulated mass spectra of <b>[6]</b> <sup>+</sup>    | S82–S83 |
| Experimental and simulated mass spectra of <b>[7]</b> <sup>+</sup>    | S84–S85 |
| Experimental and simulated mass spectra of <b>[8]</b> <sup>+</sup>    | S86–S87 |

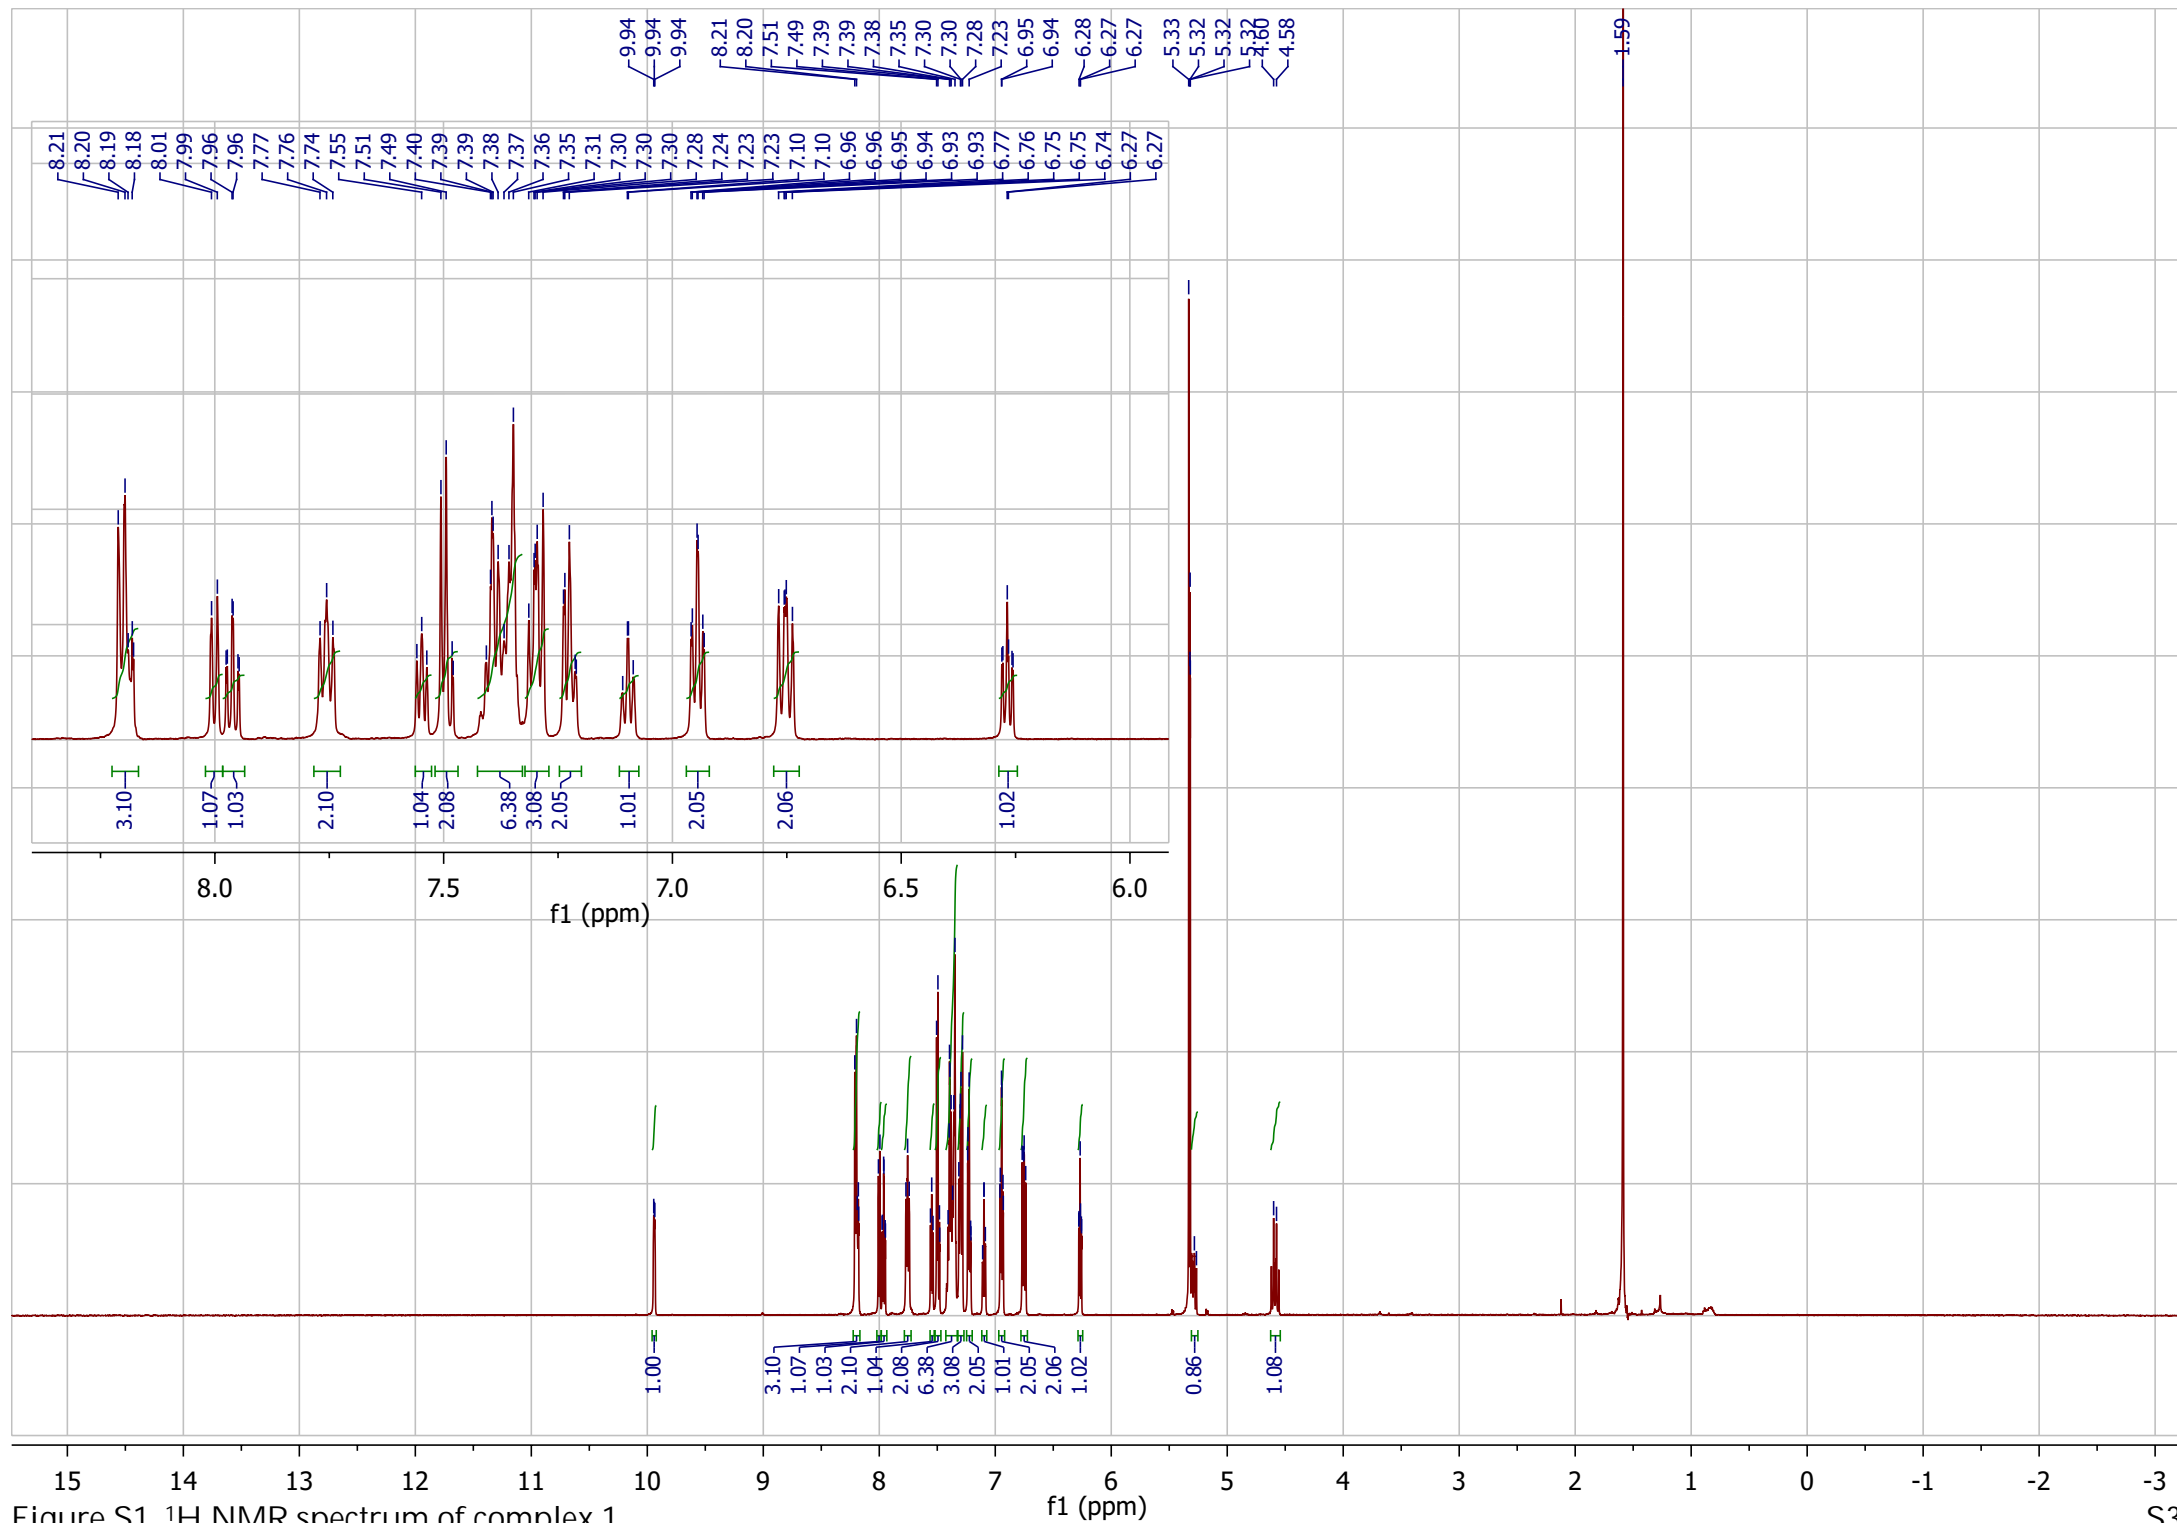

Figure S1.  $^1\text{H}$  NMR spectrum of complex 1.

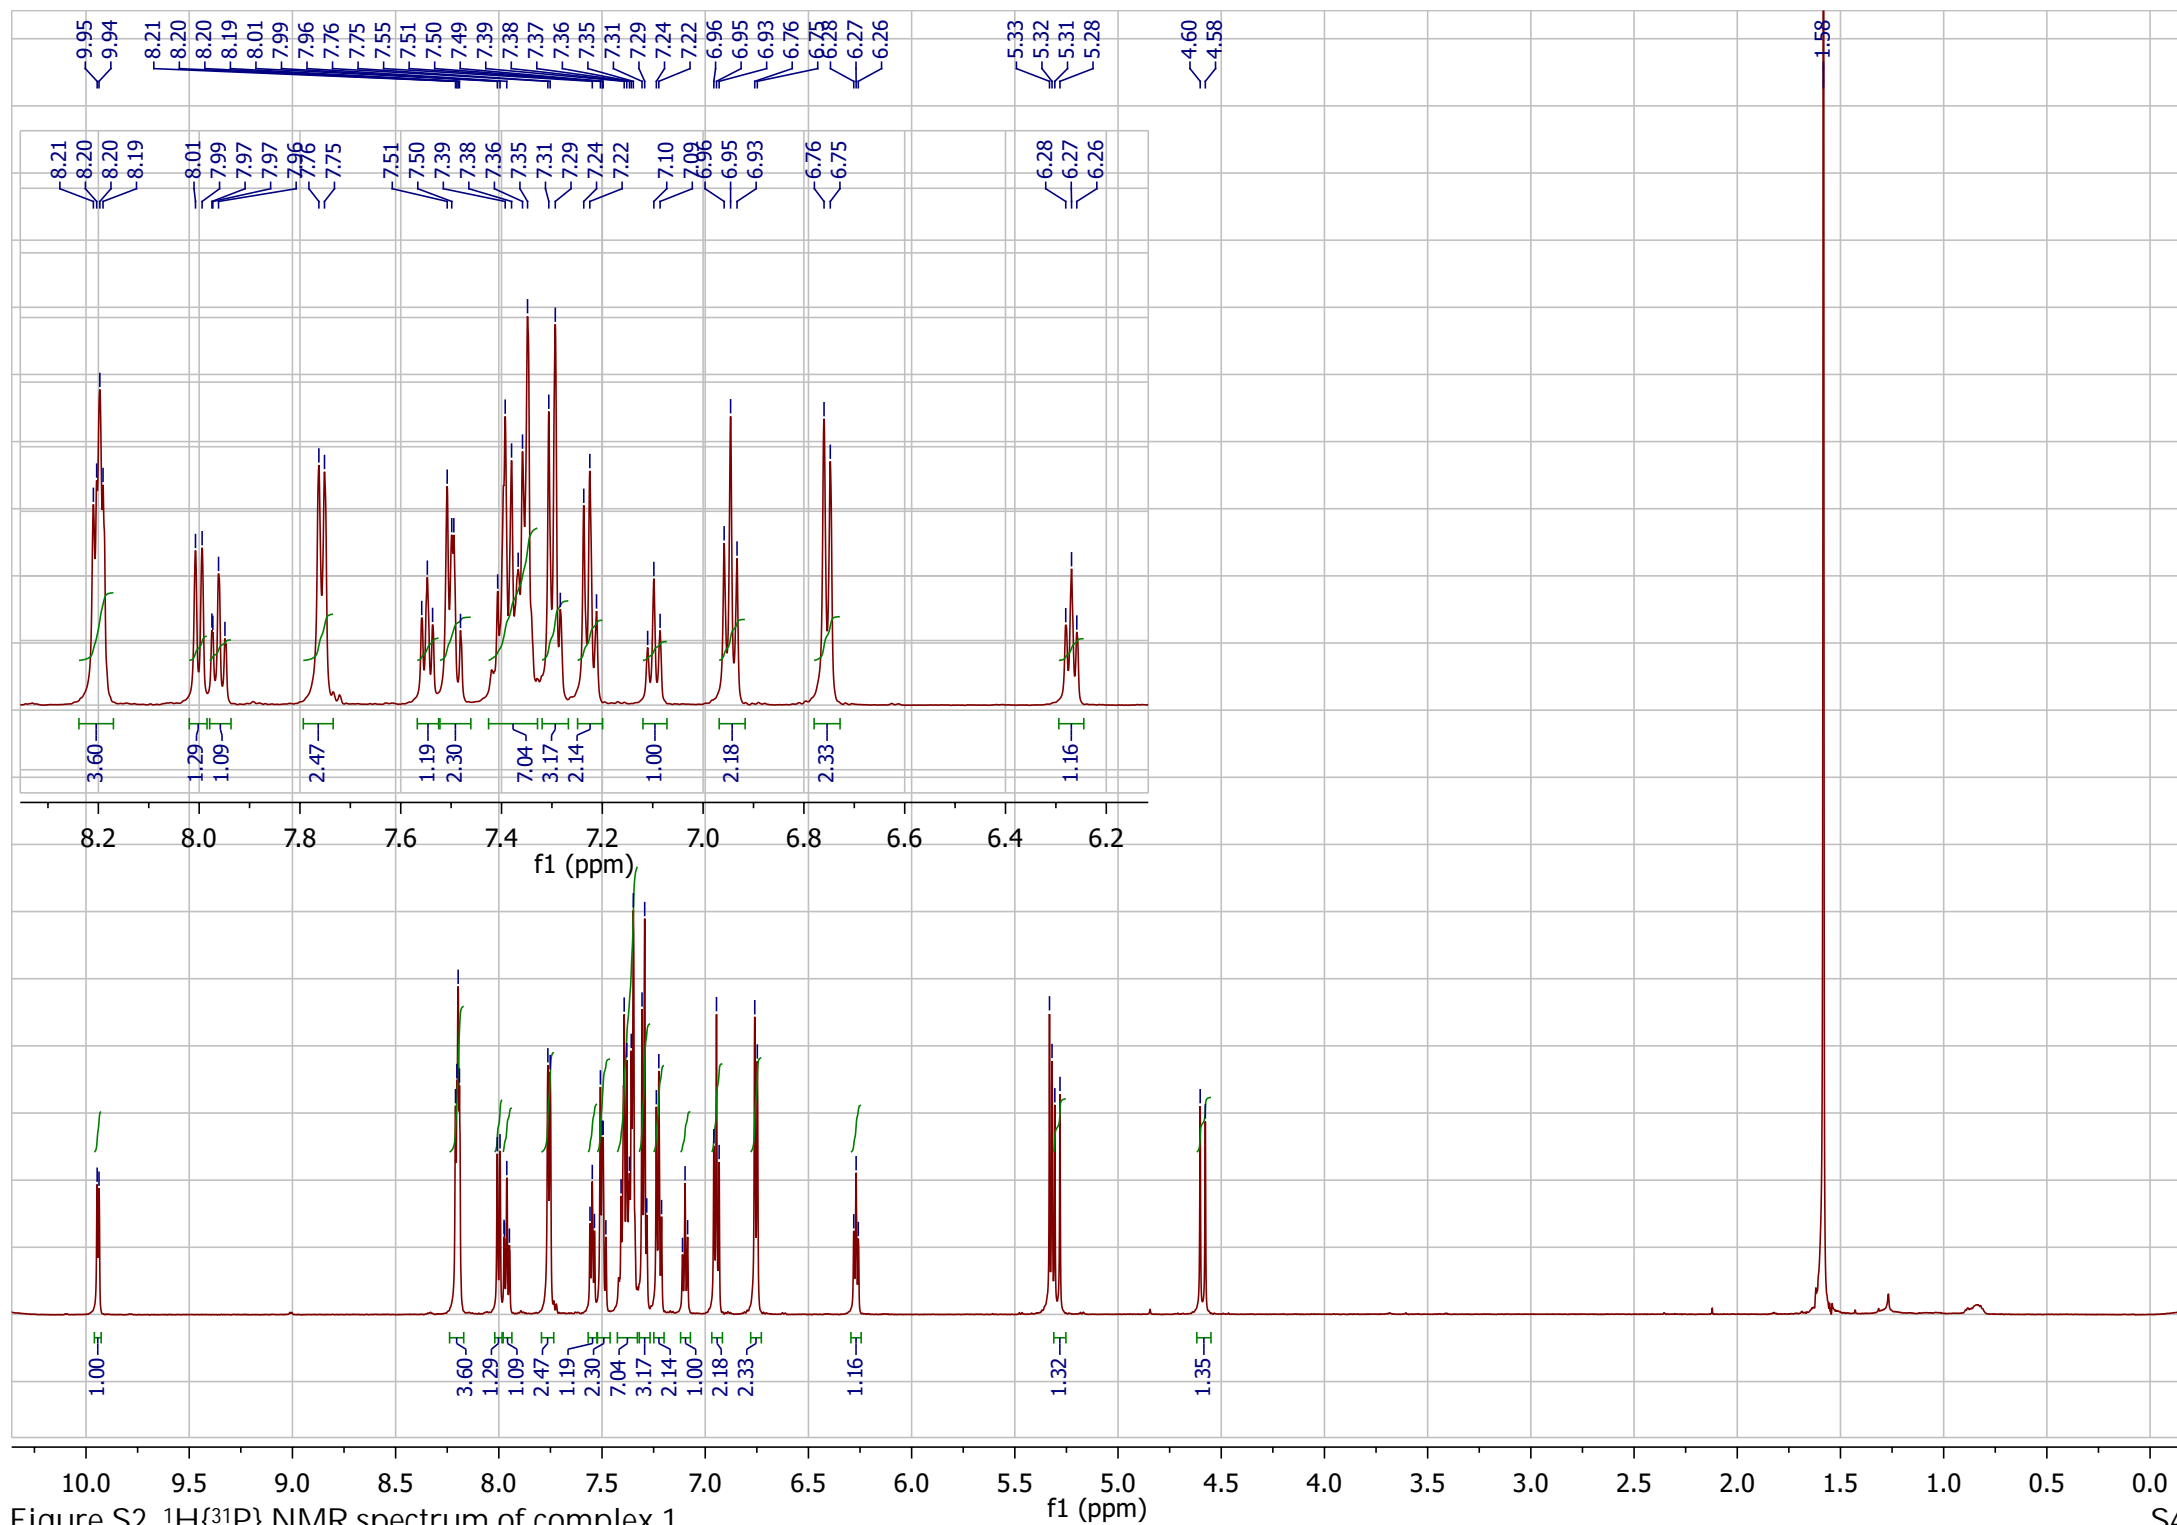

Figure S2.  $^1\text{H}\{^{31}\text{P}\}$  NMR spectrum of complex 1.



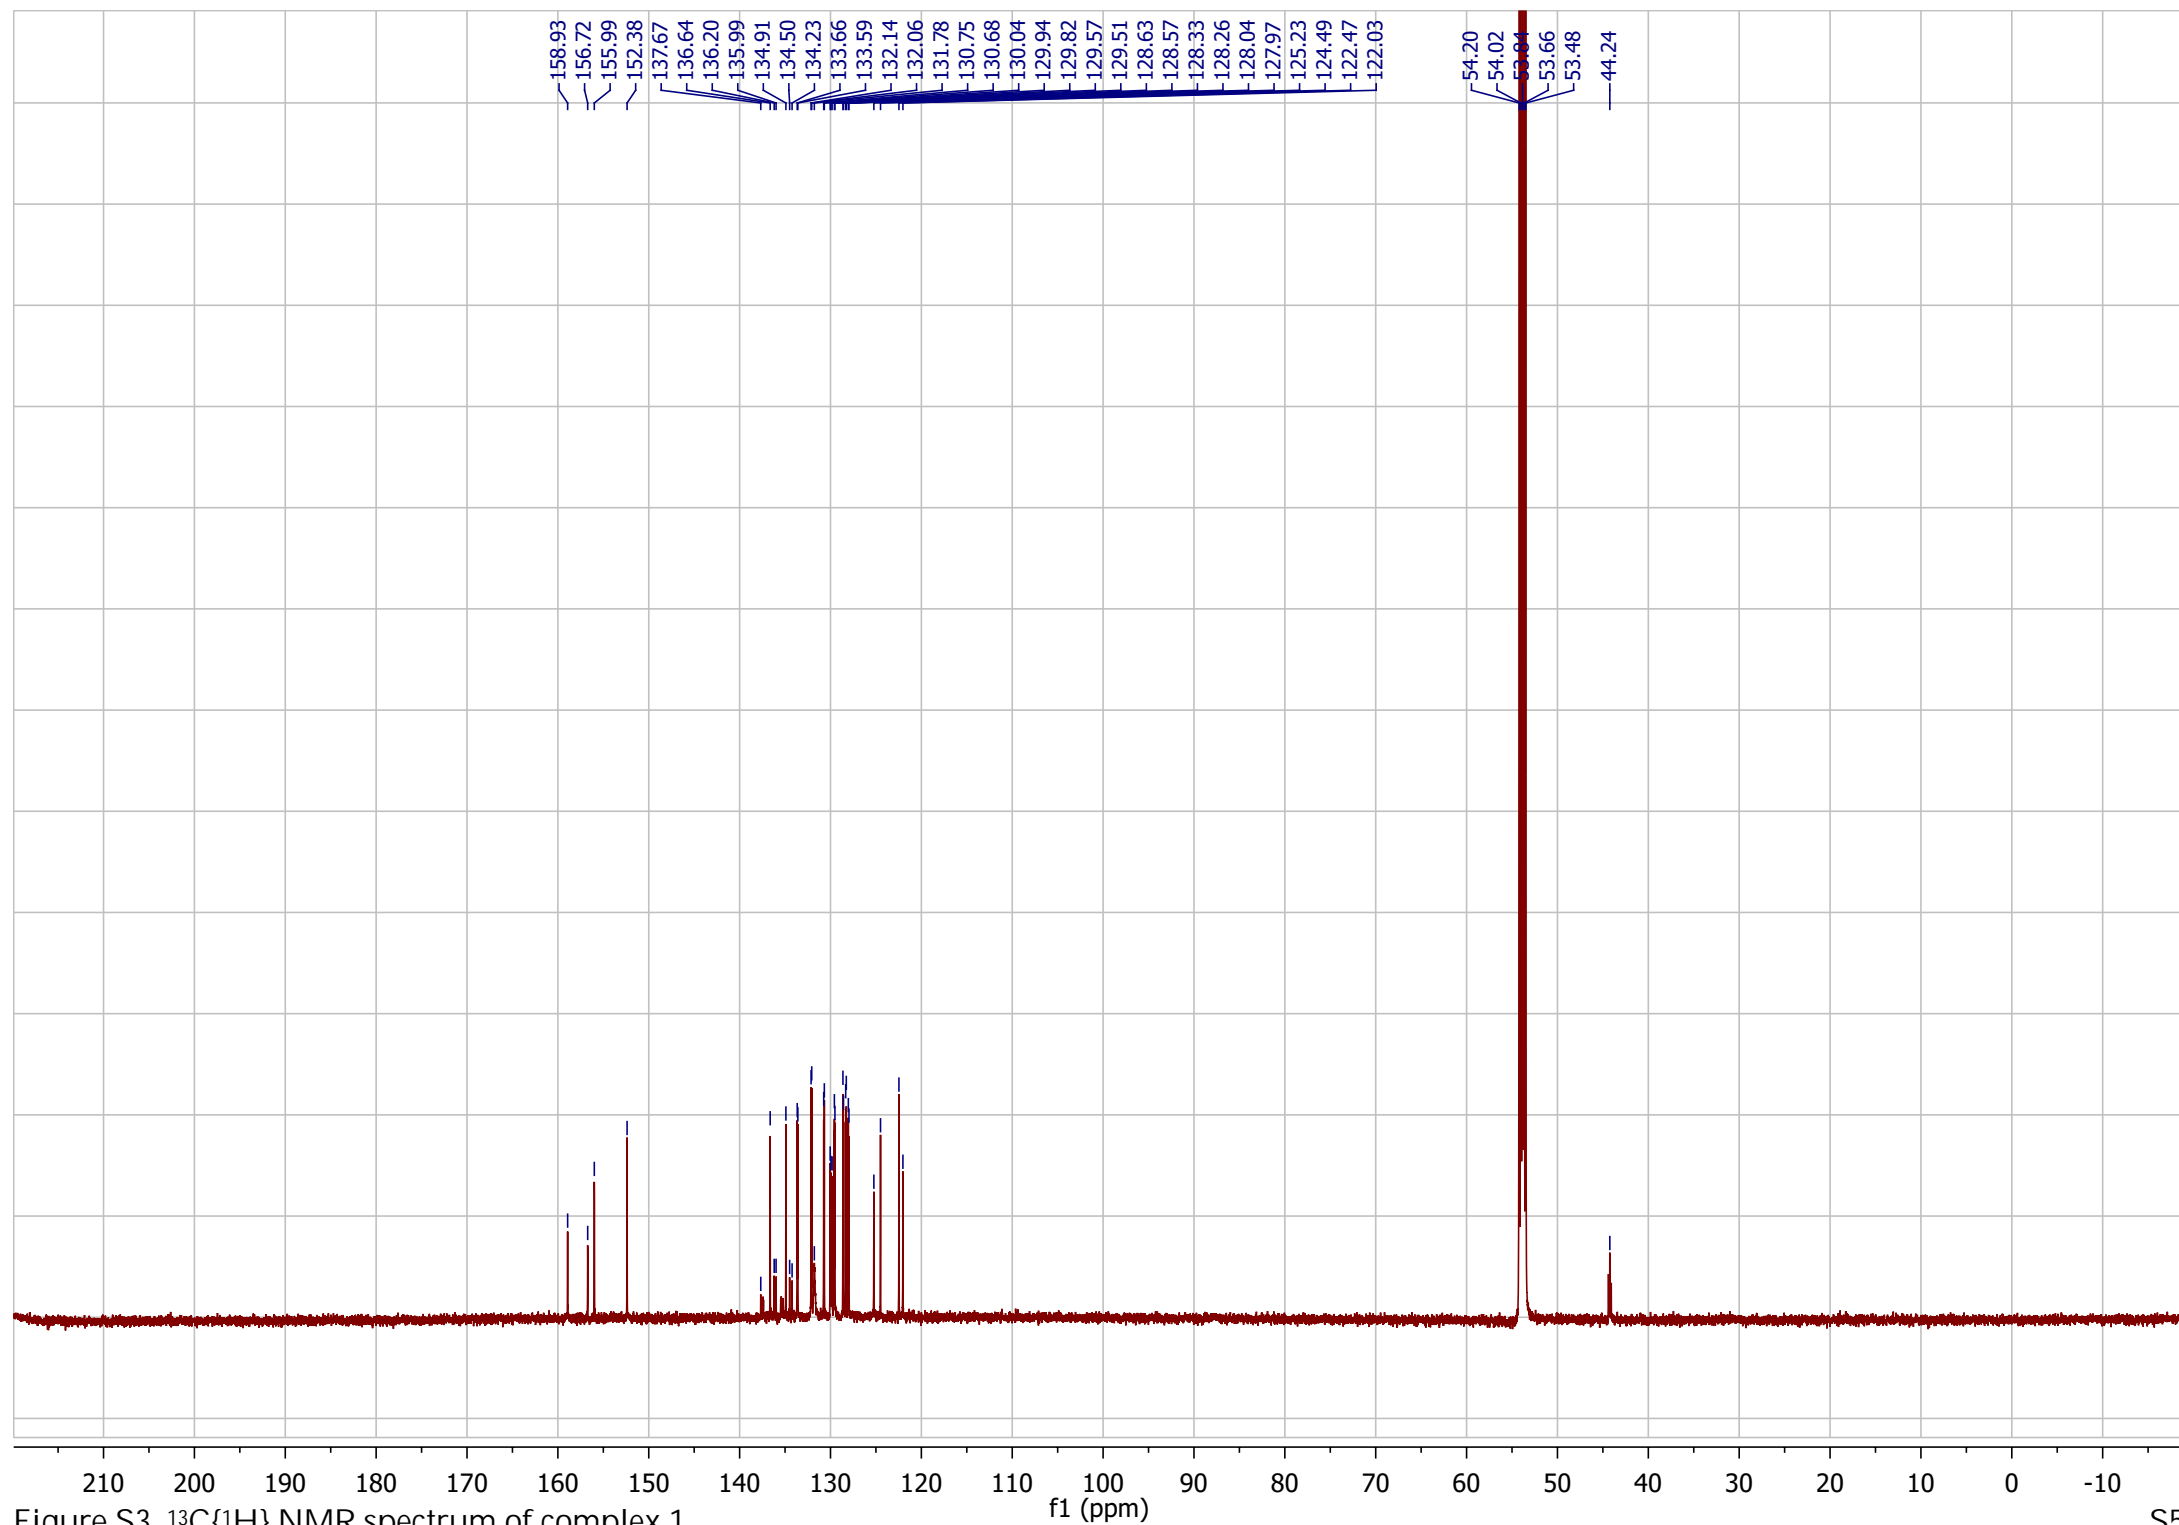

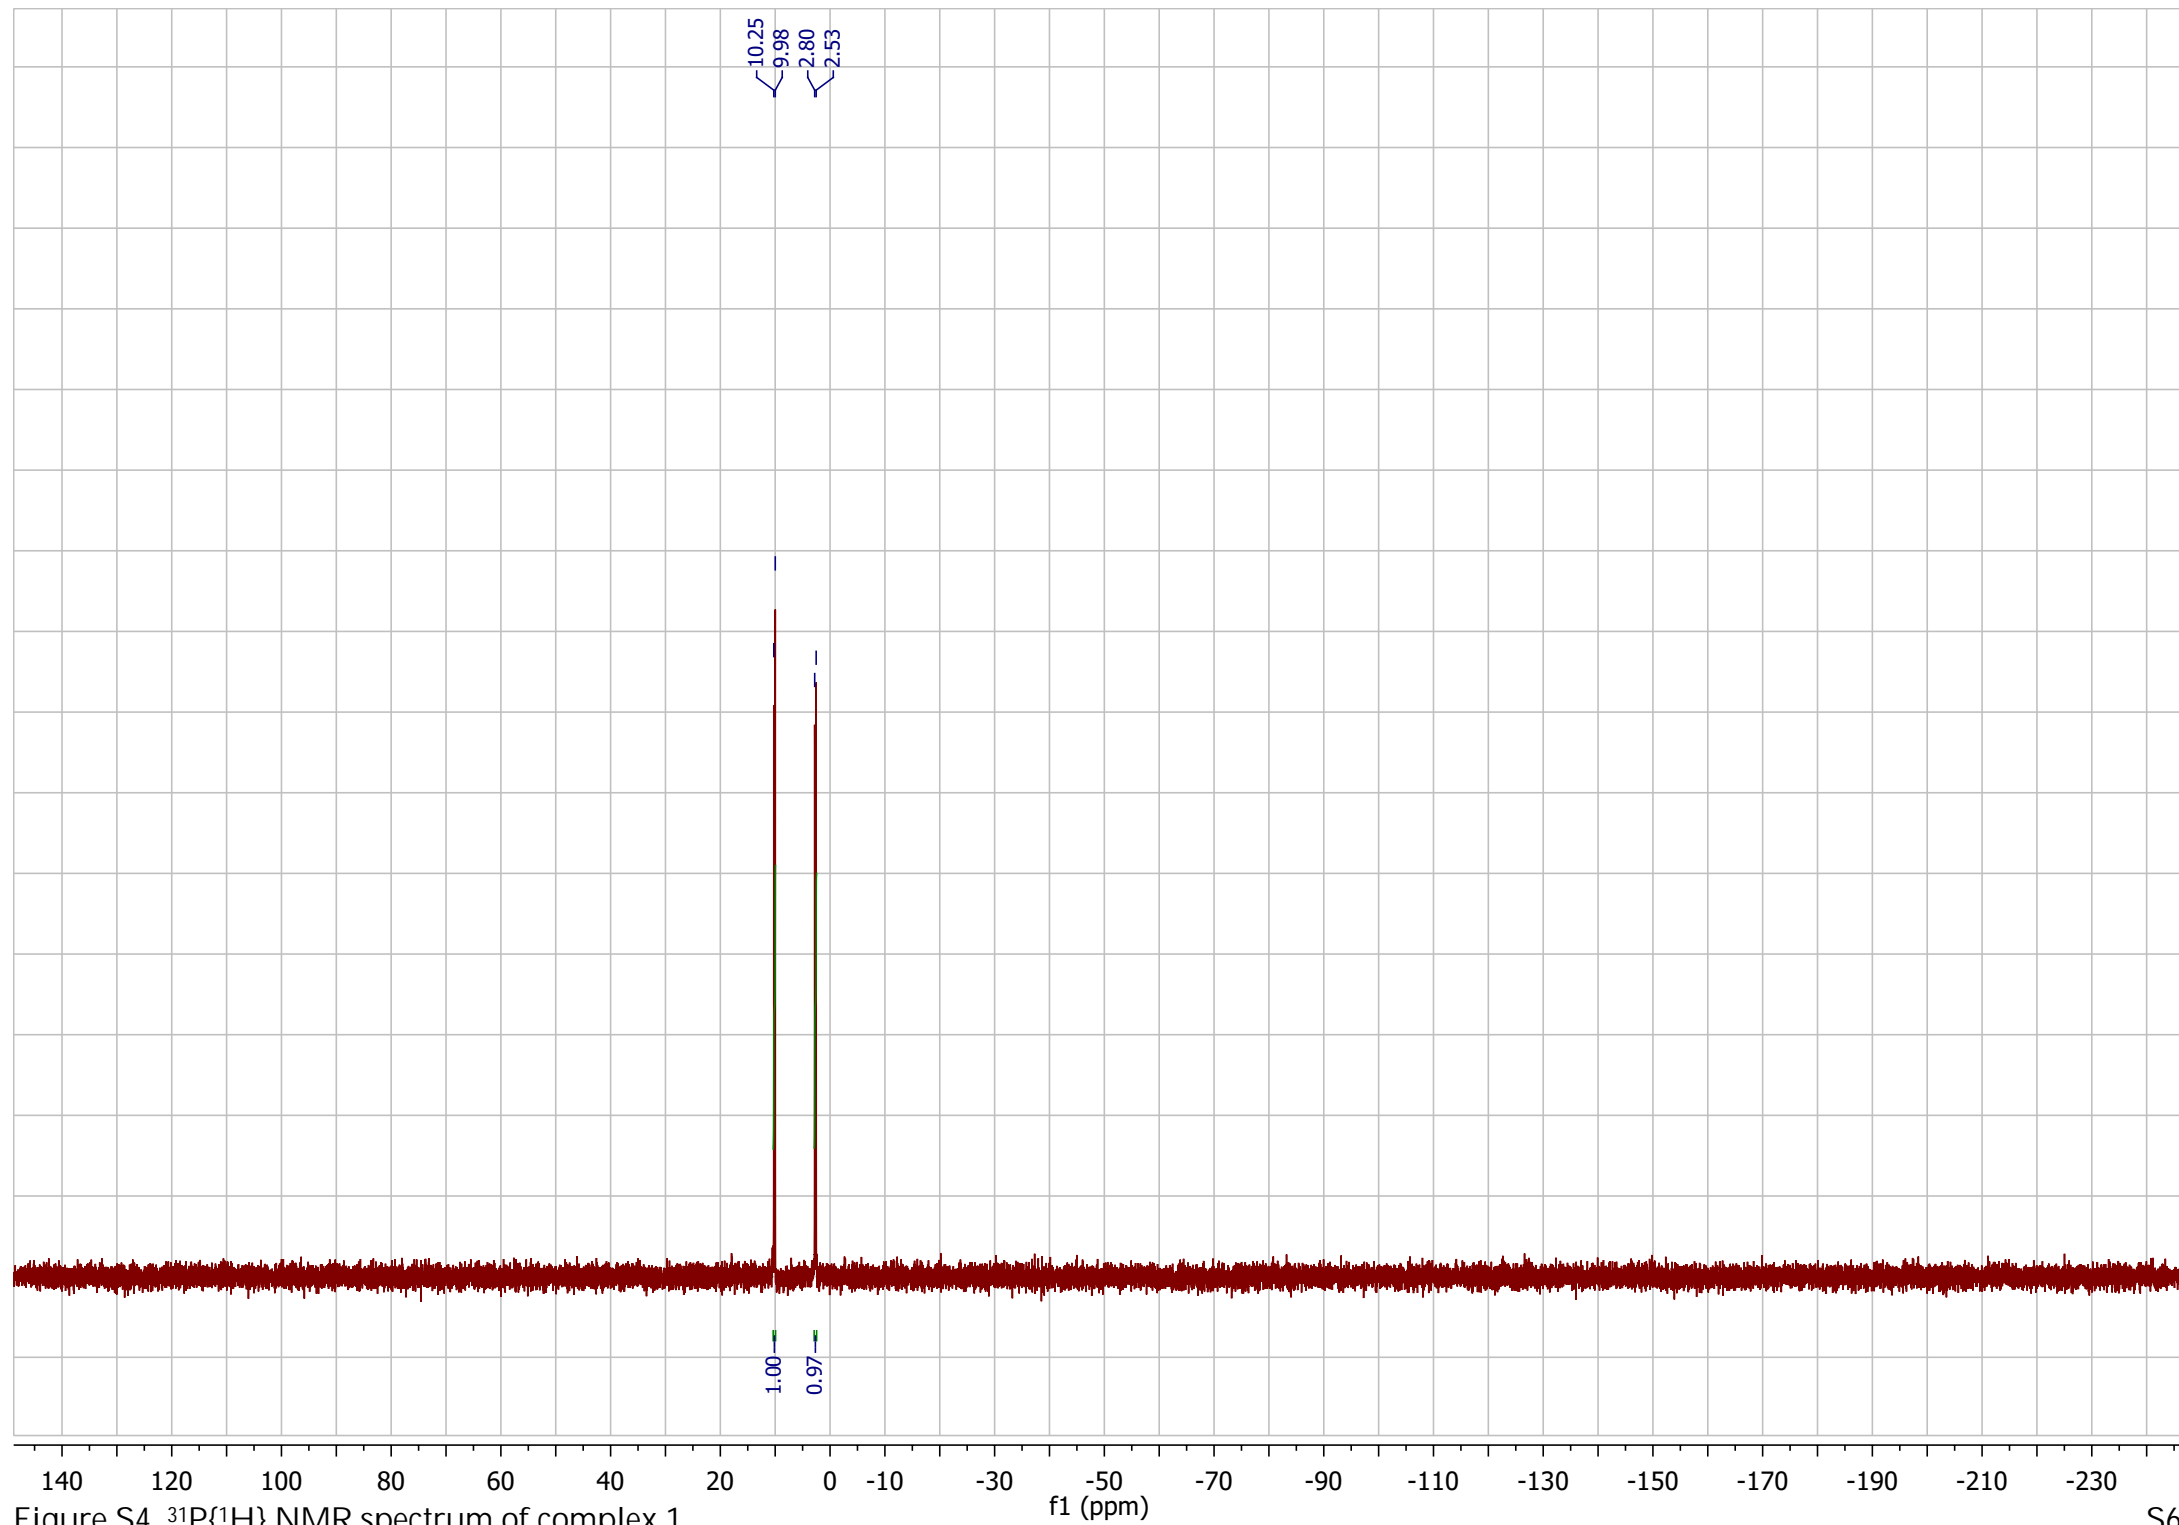

Figure S4.  $^{31}\text{P}\{^1\text{H}\}$  NMR spectrum of complex 1.

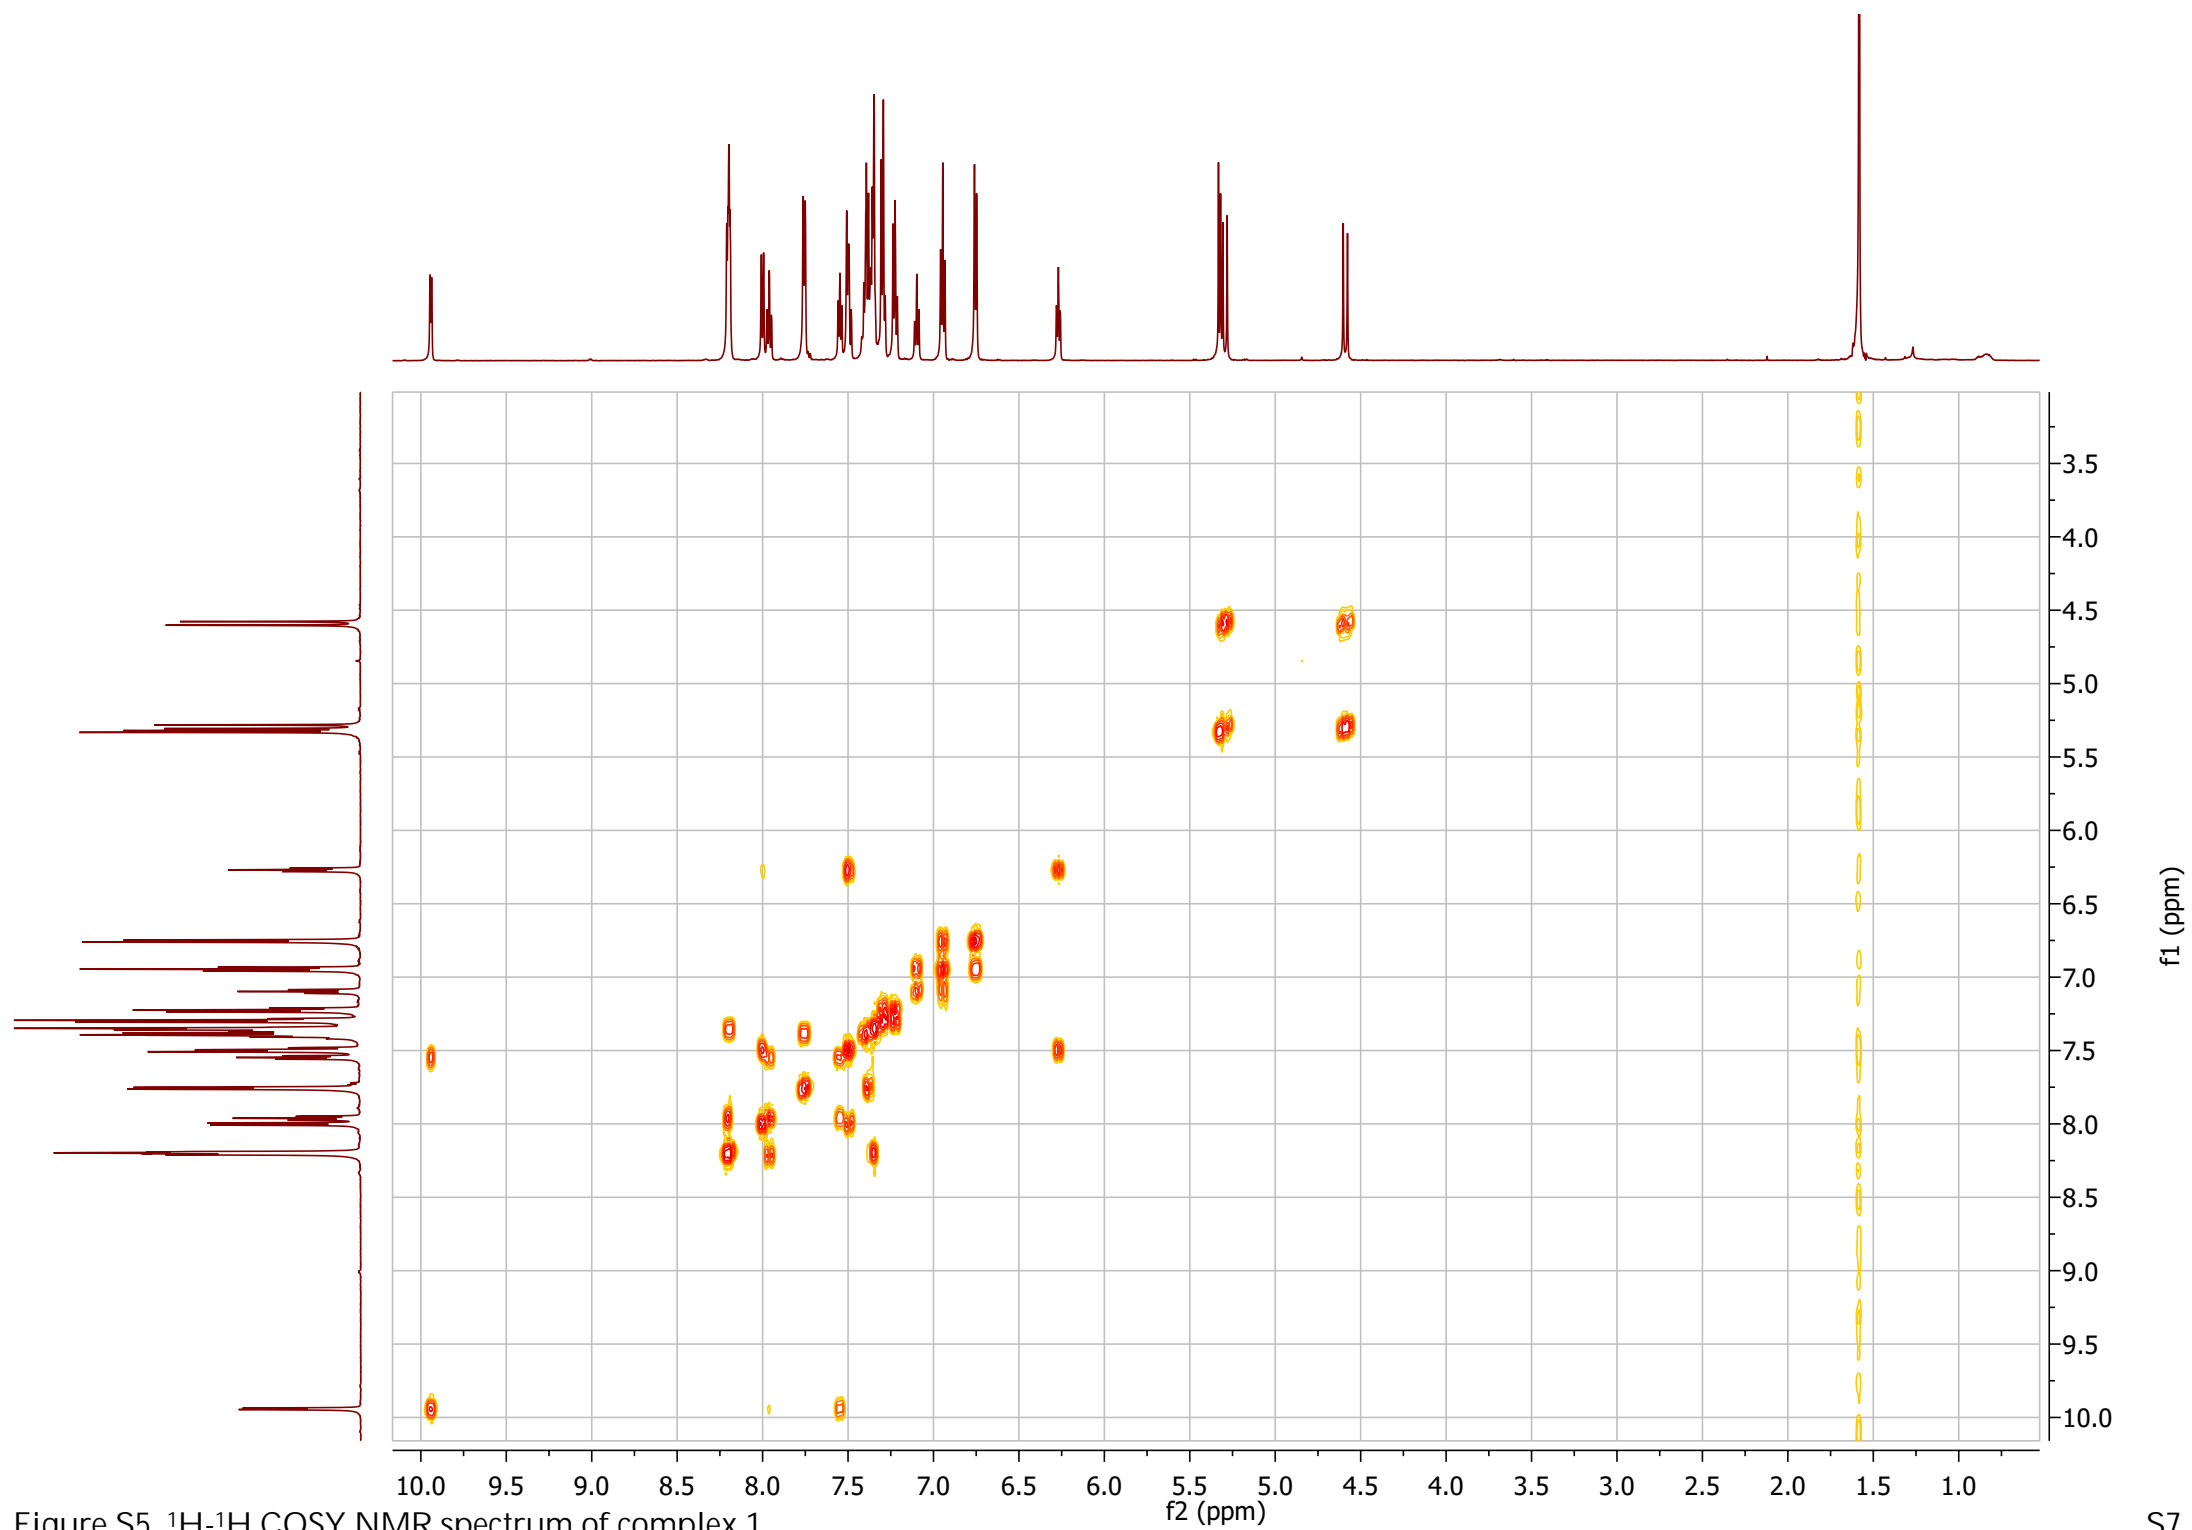

Figure S5.  ${}^1\text{H}$ - ${}^1\text{H}$  COSY NMR spectrum of complex 1.

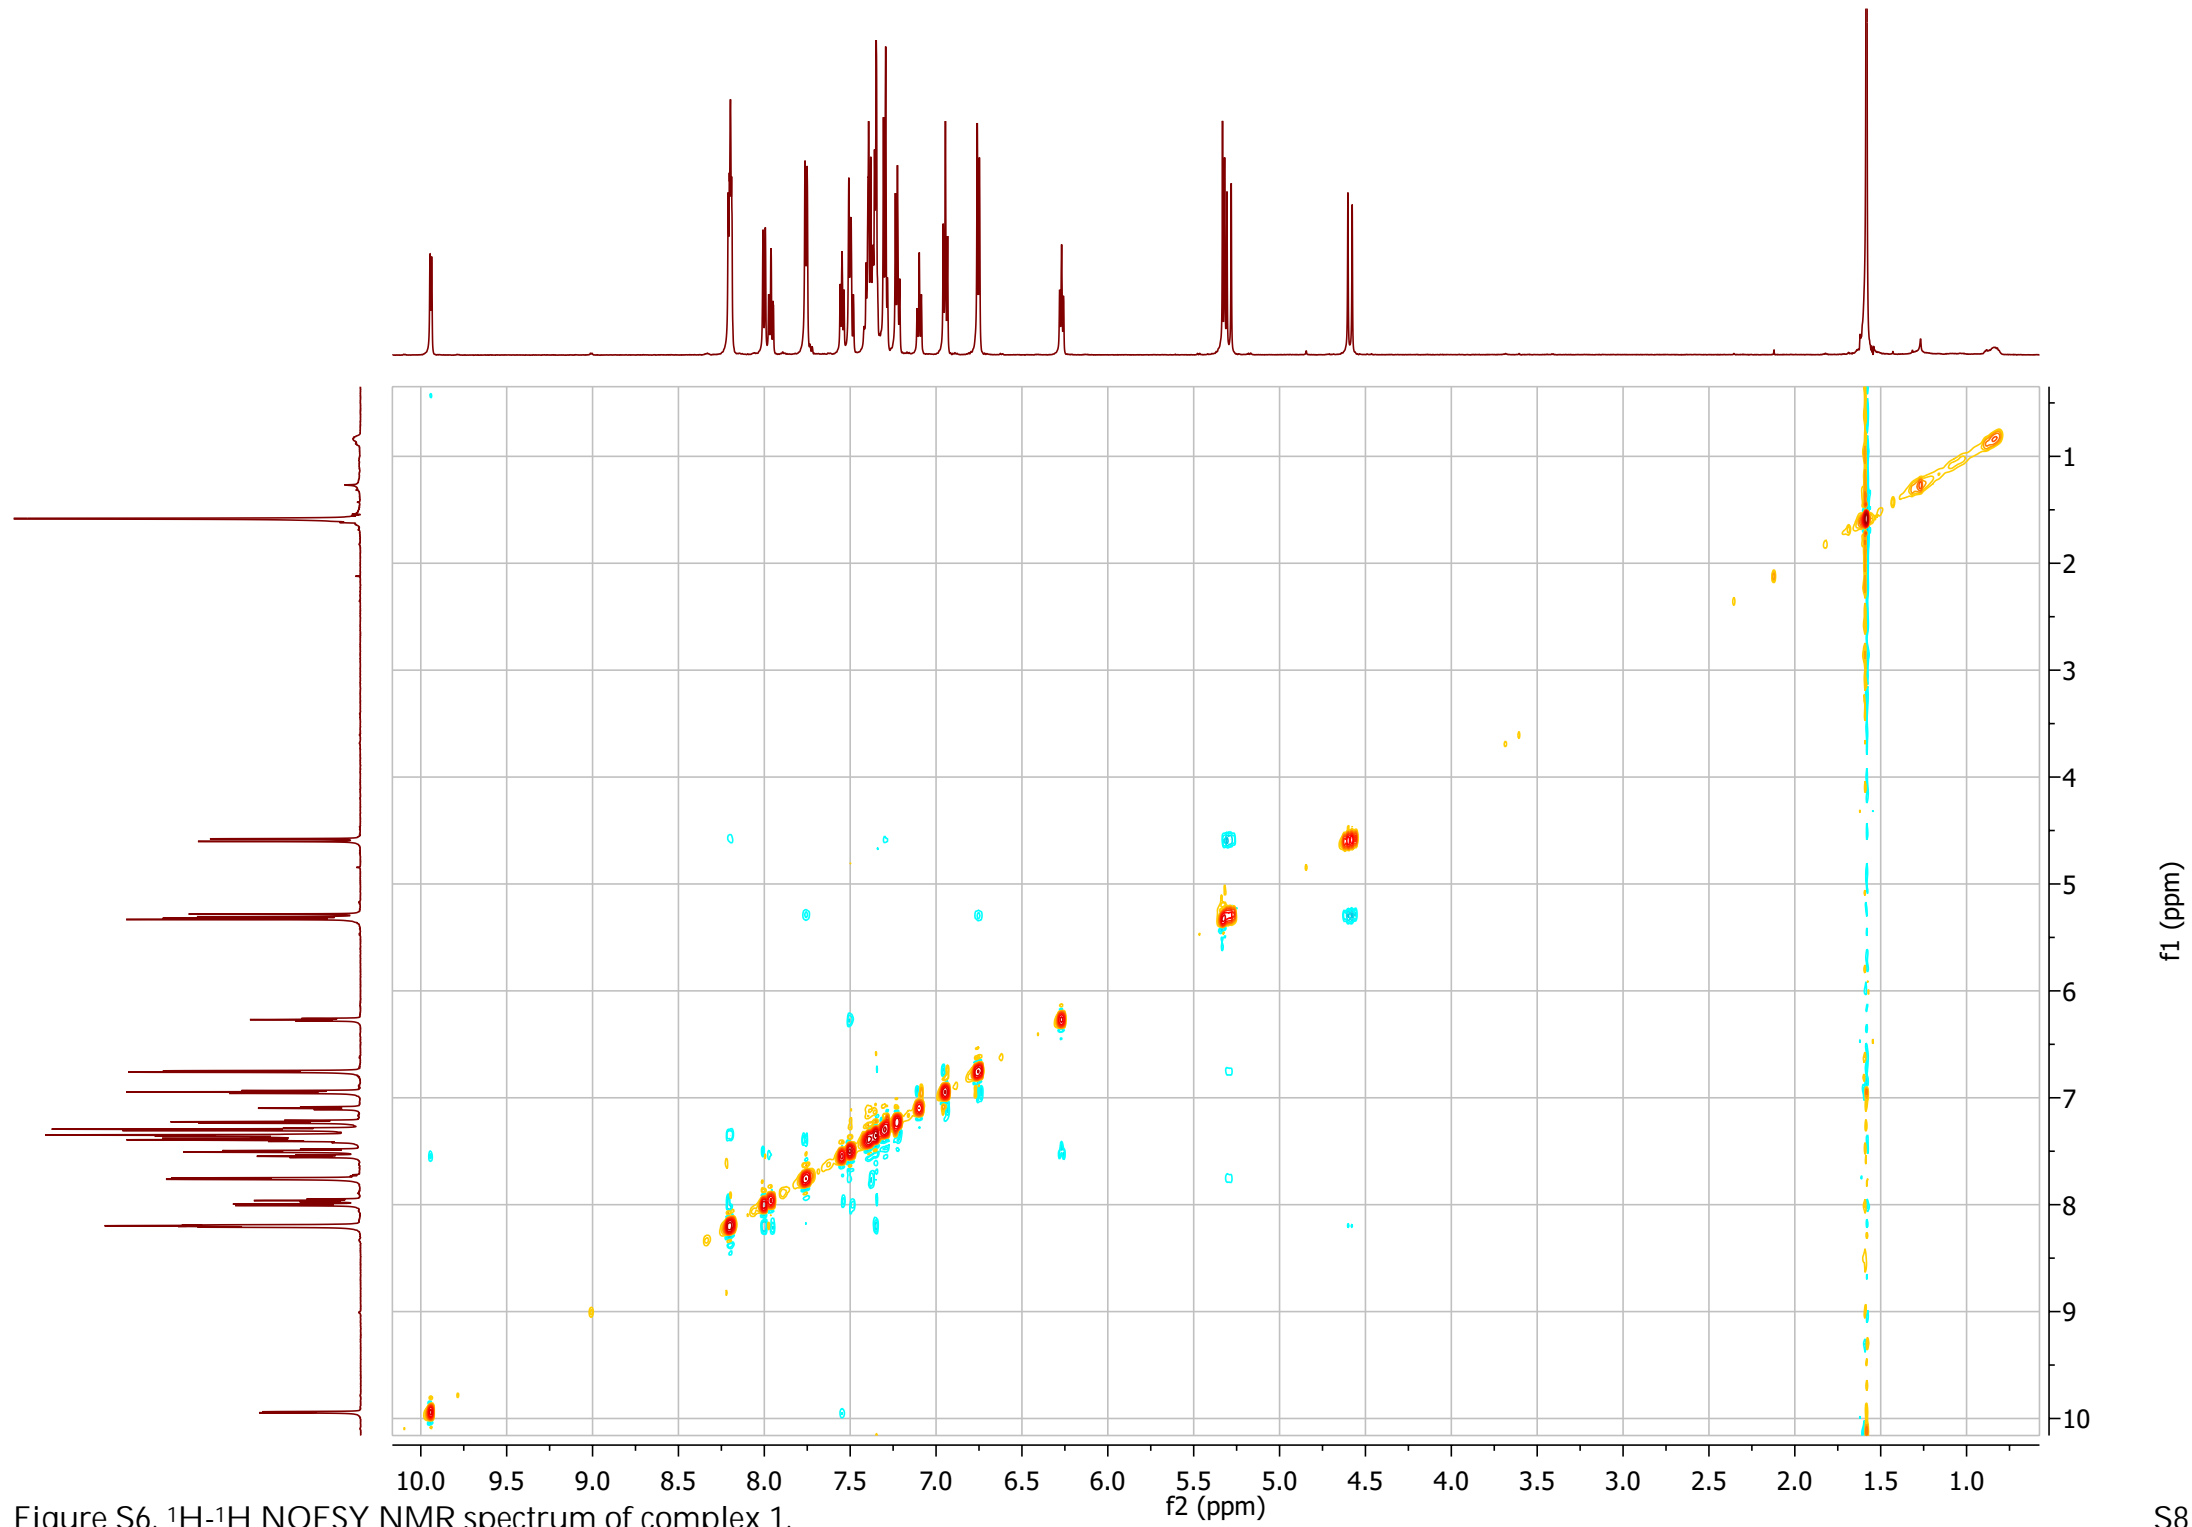

Figure S6.  $^1\text{H}$ - $^1\text{H}$  NOESY NMR spectrum of complex 1.

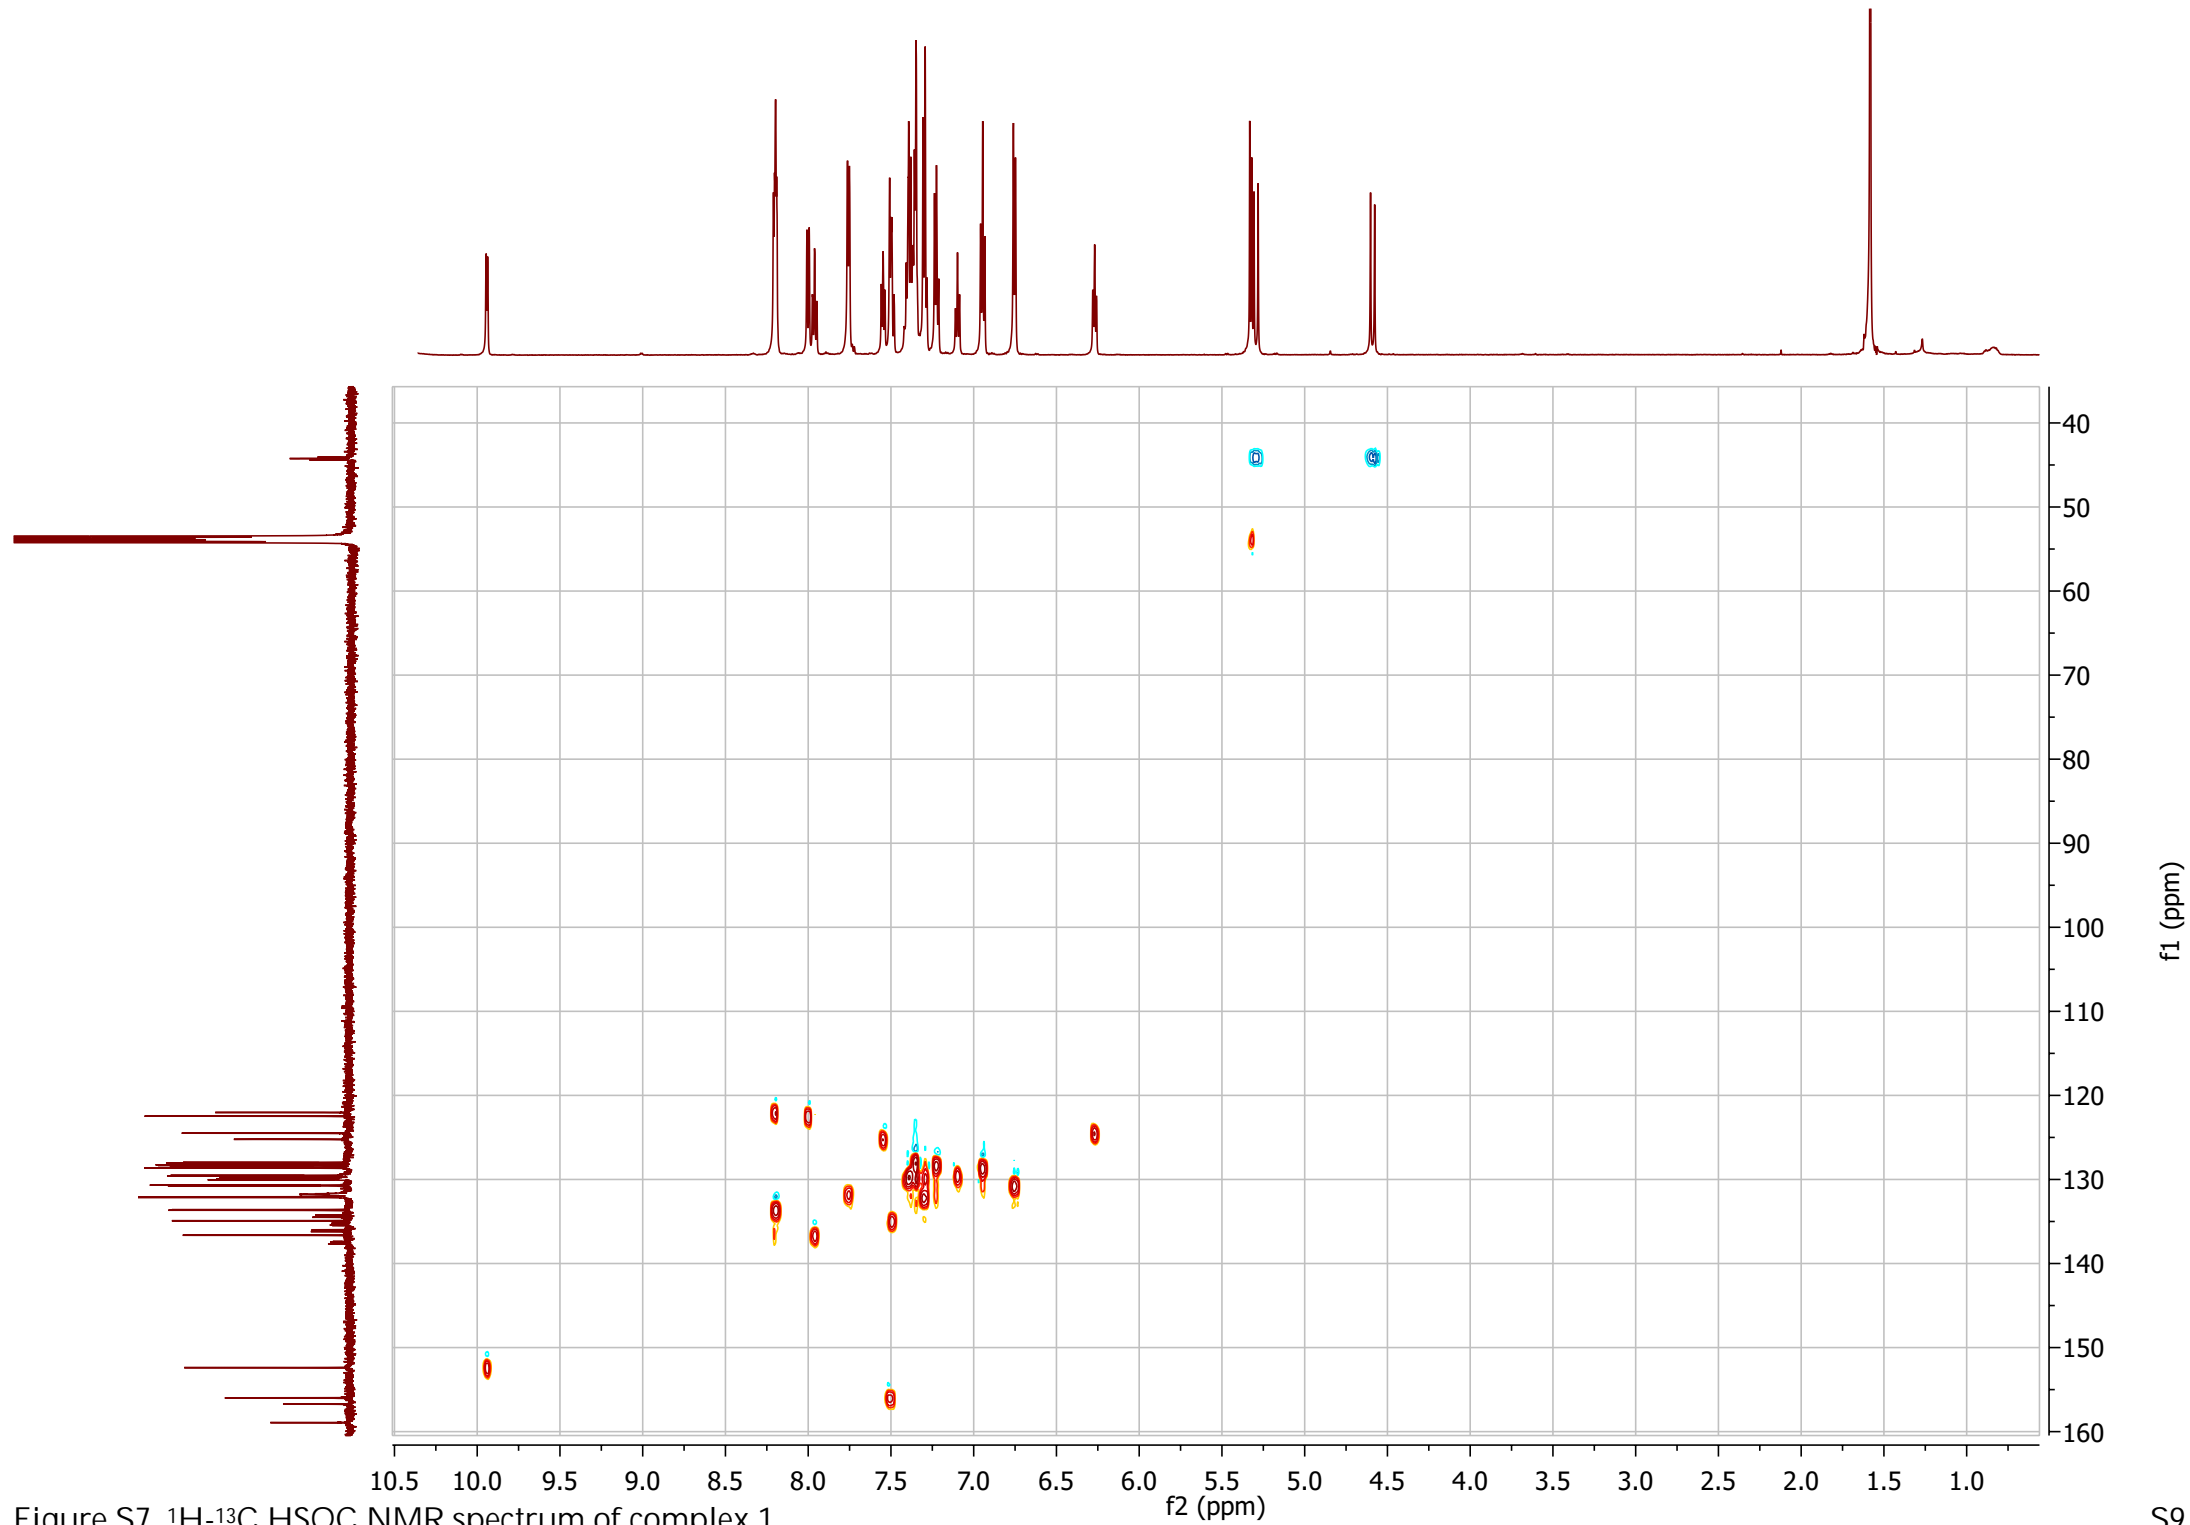

Figure S7.  $^1\text{H}$ - $^{13}\text{C}$  HSQC NMR spectrum of complex 1.

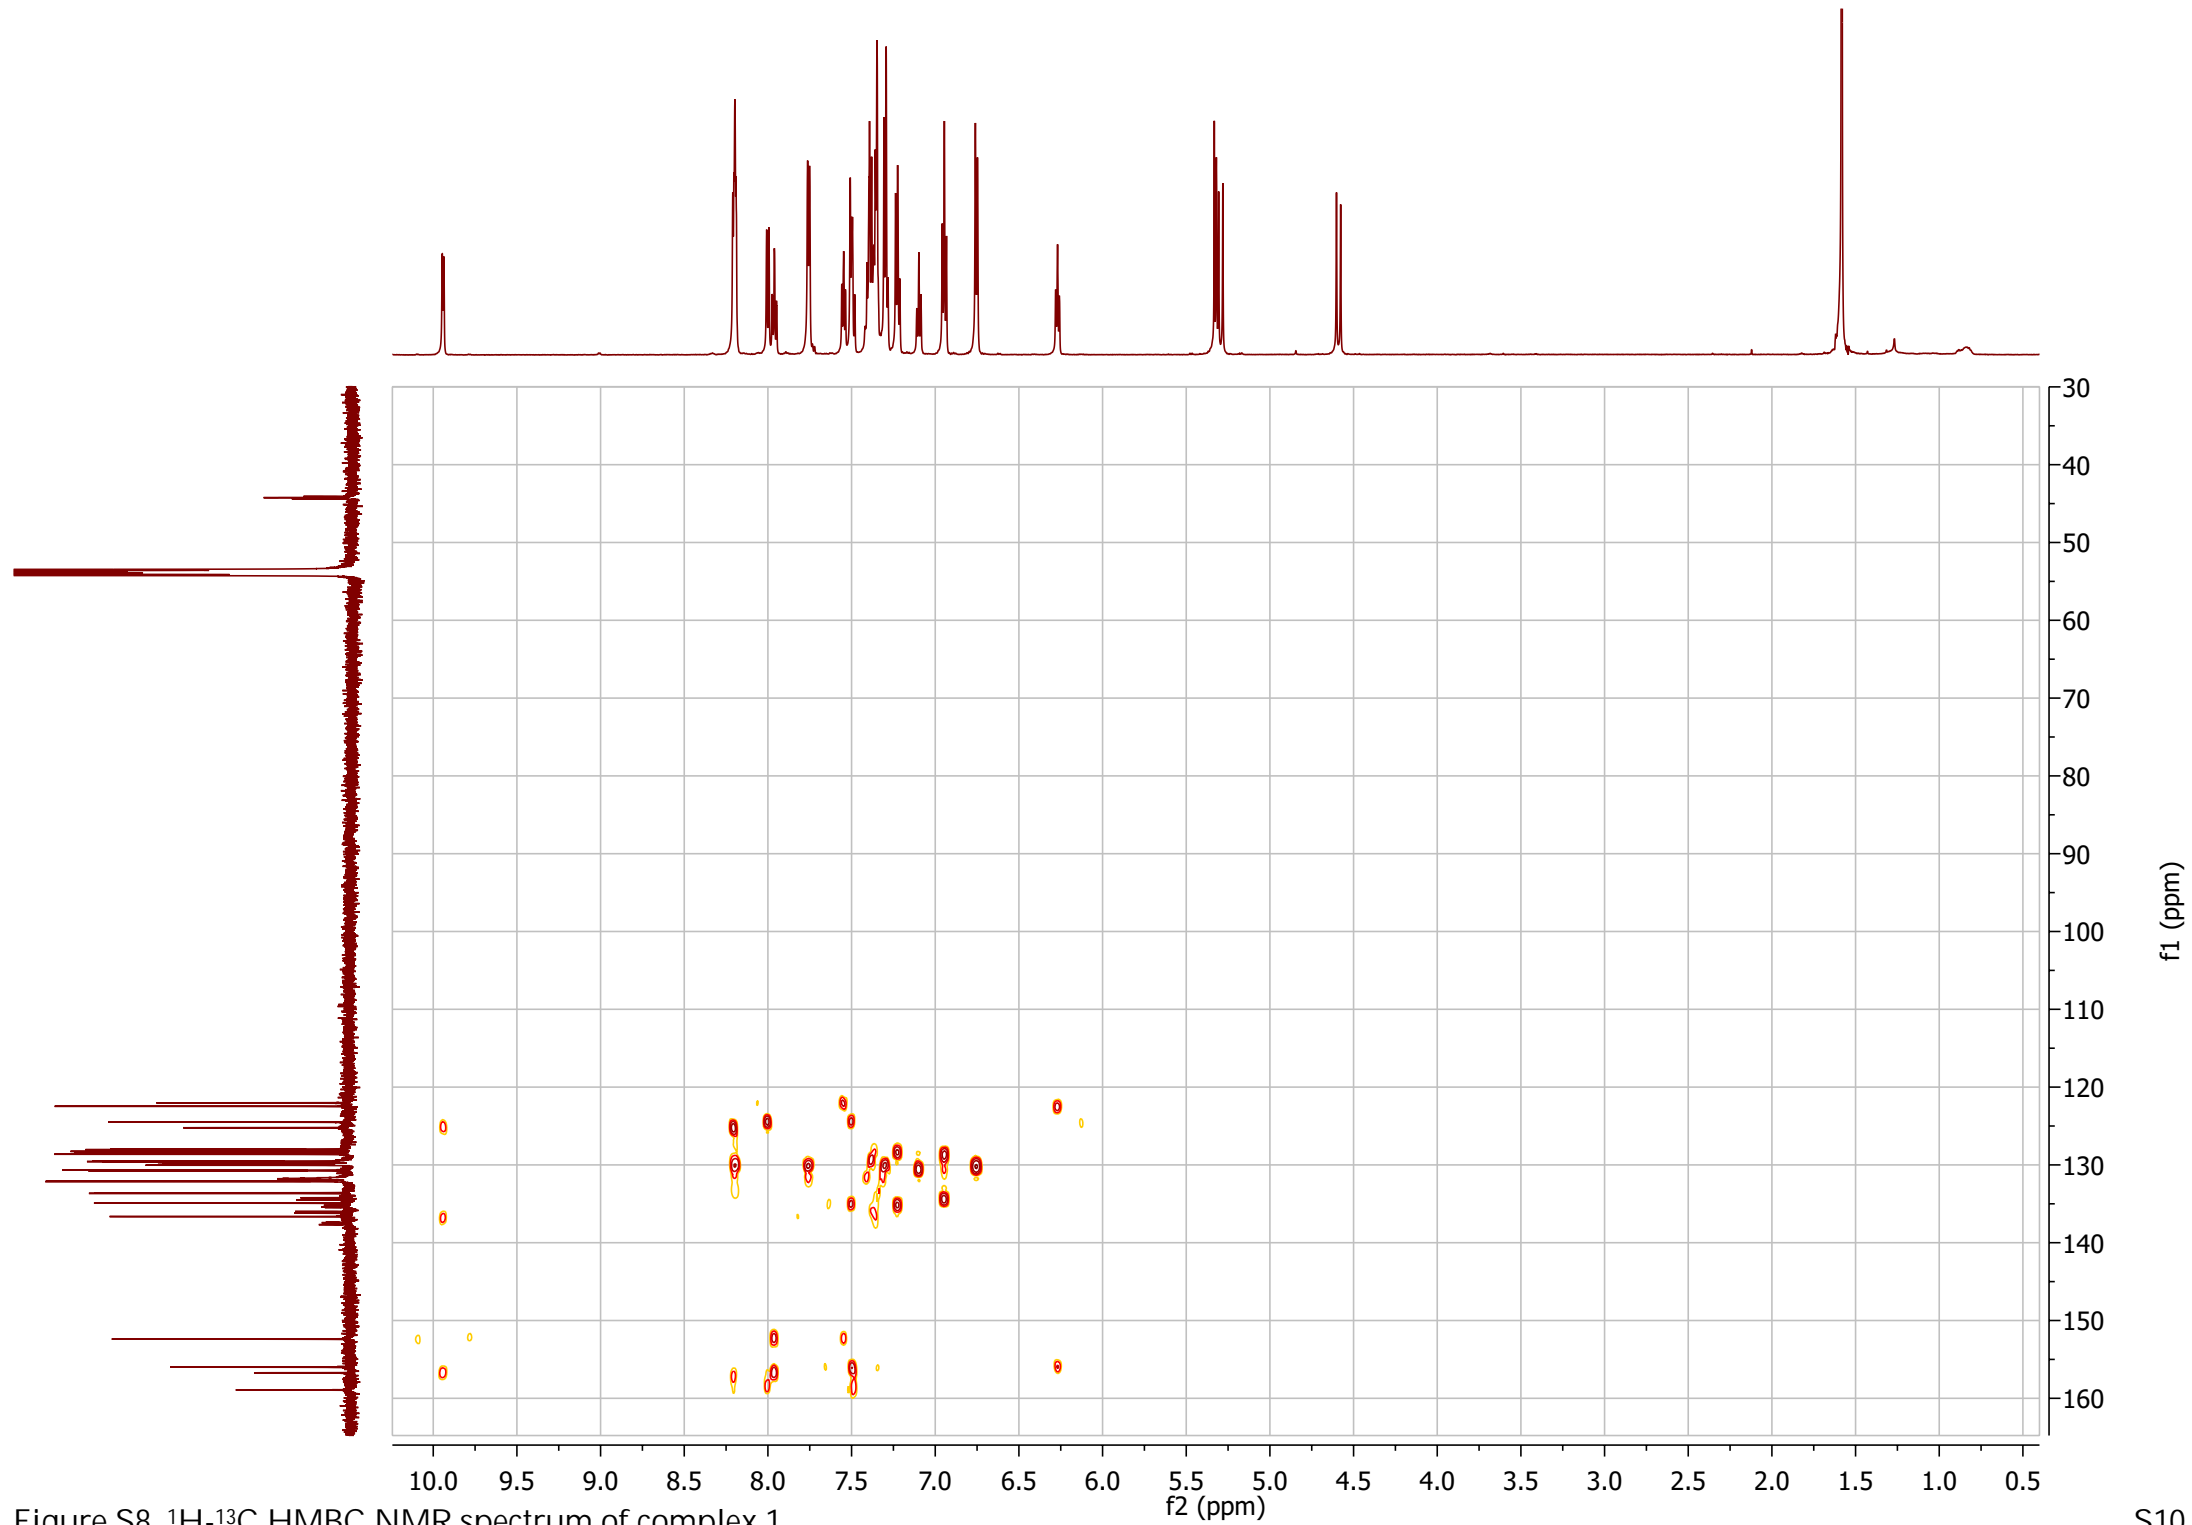

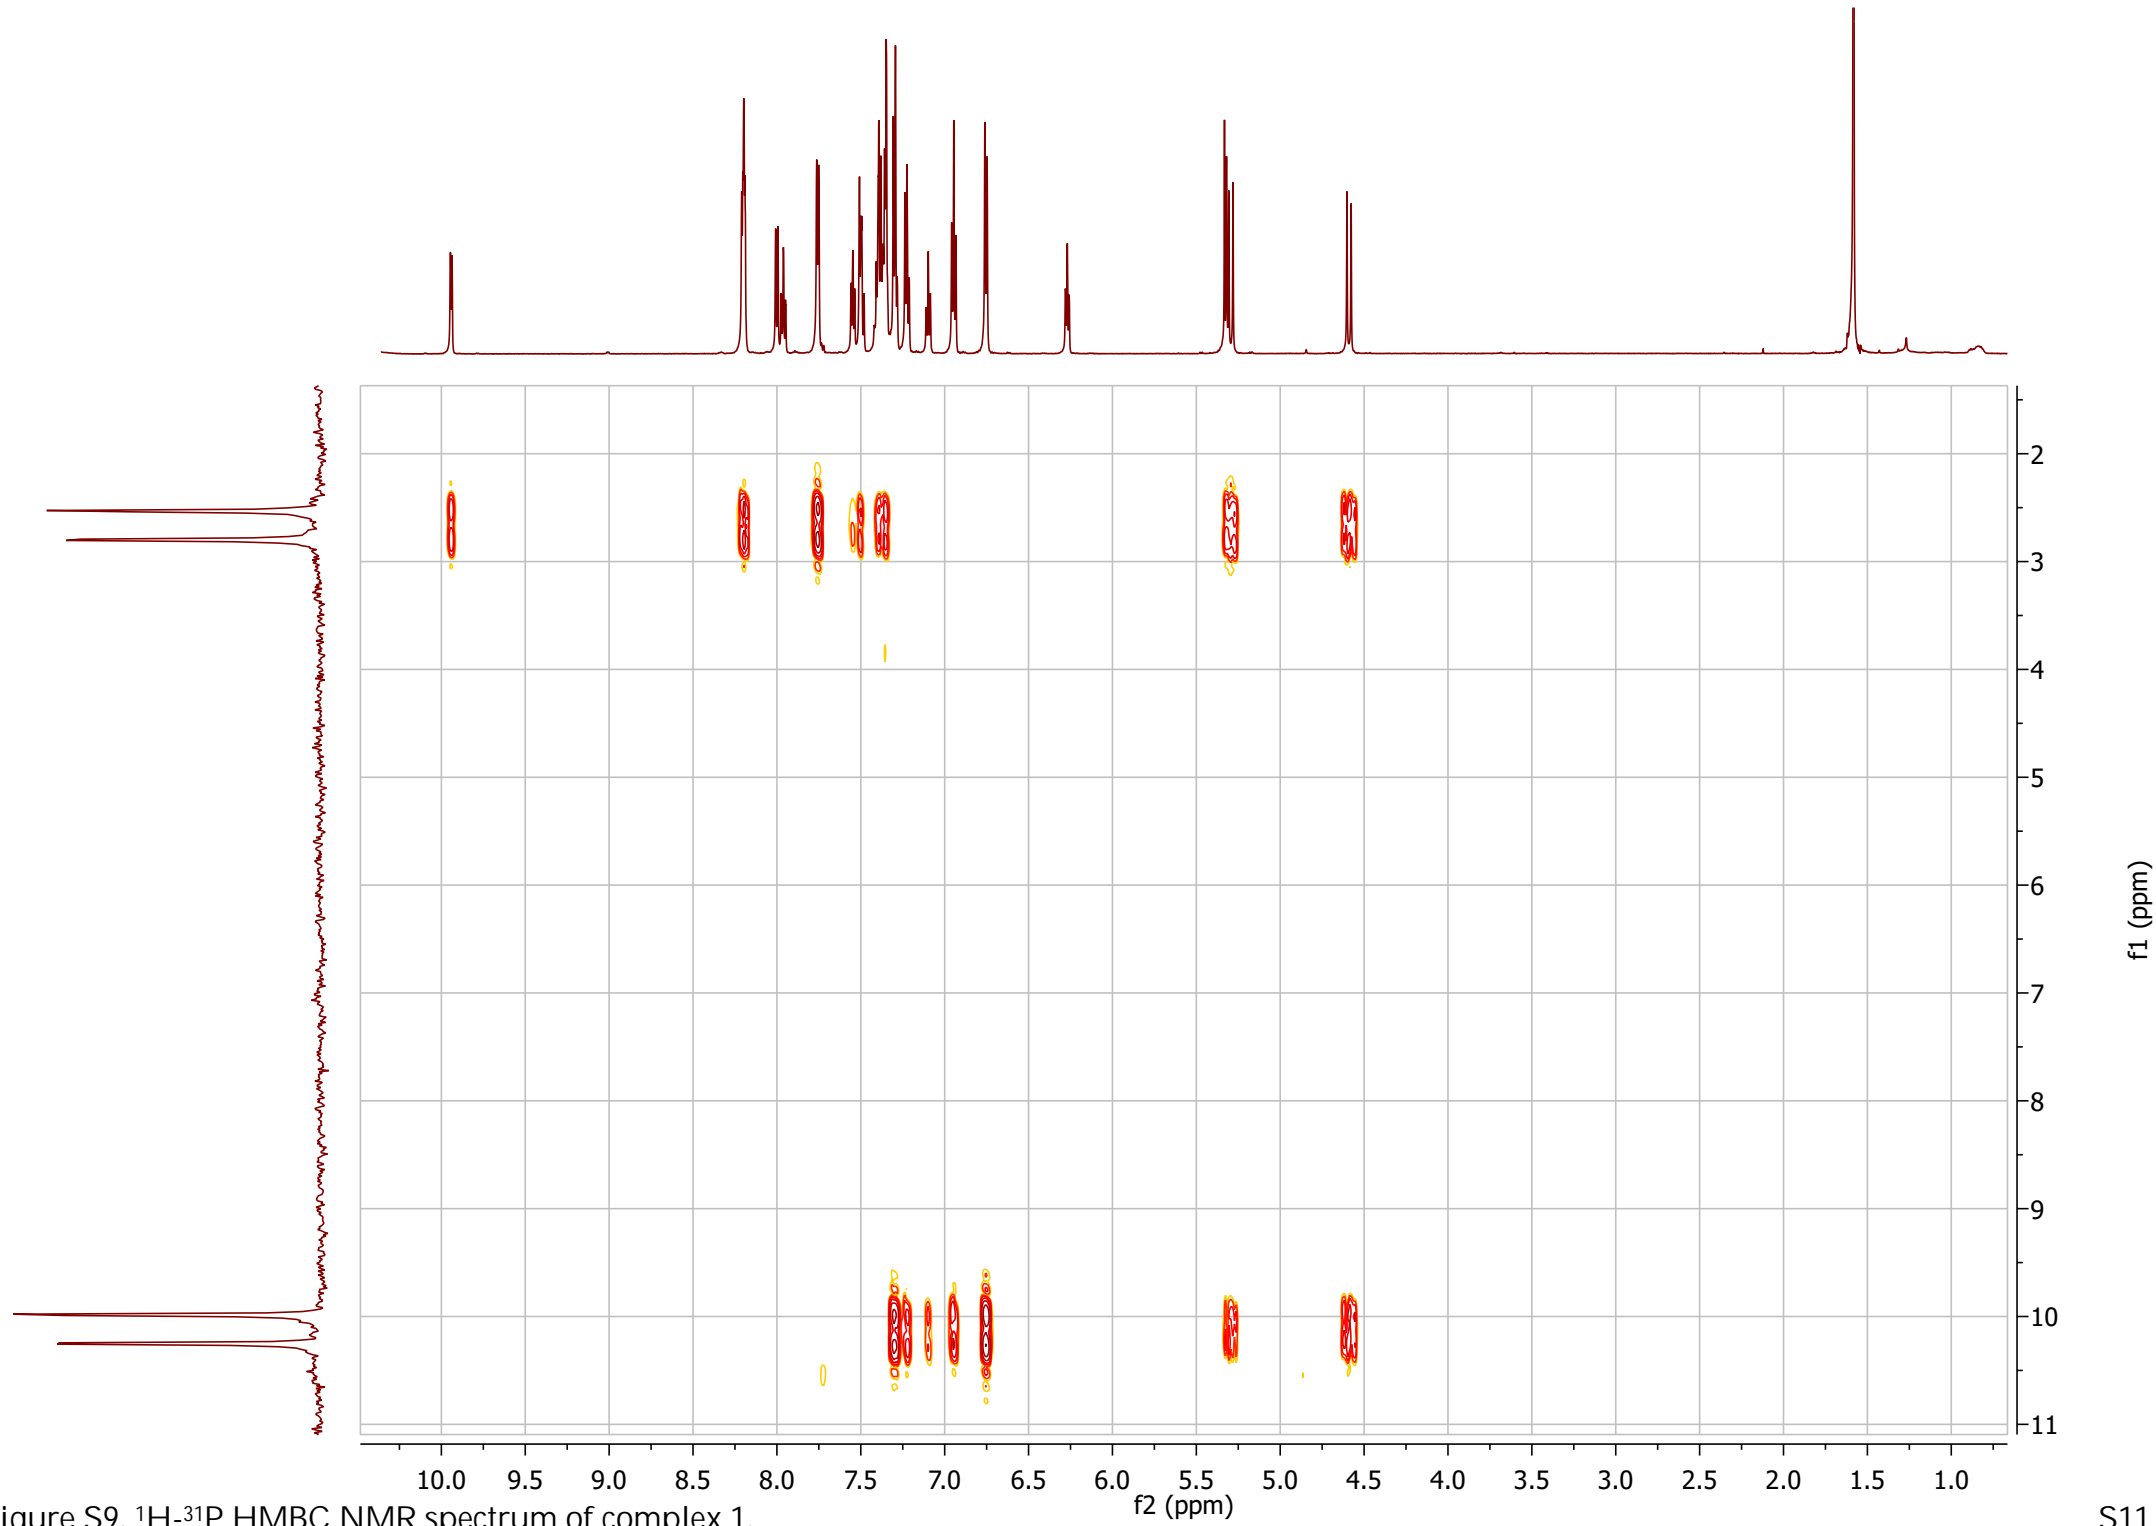

Figure S9.  $^1\text{H}$ - $^{31}\text{P}$  HMBC NMR spectrum of complex 1.

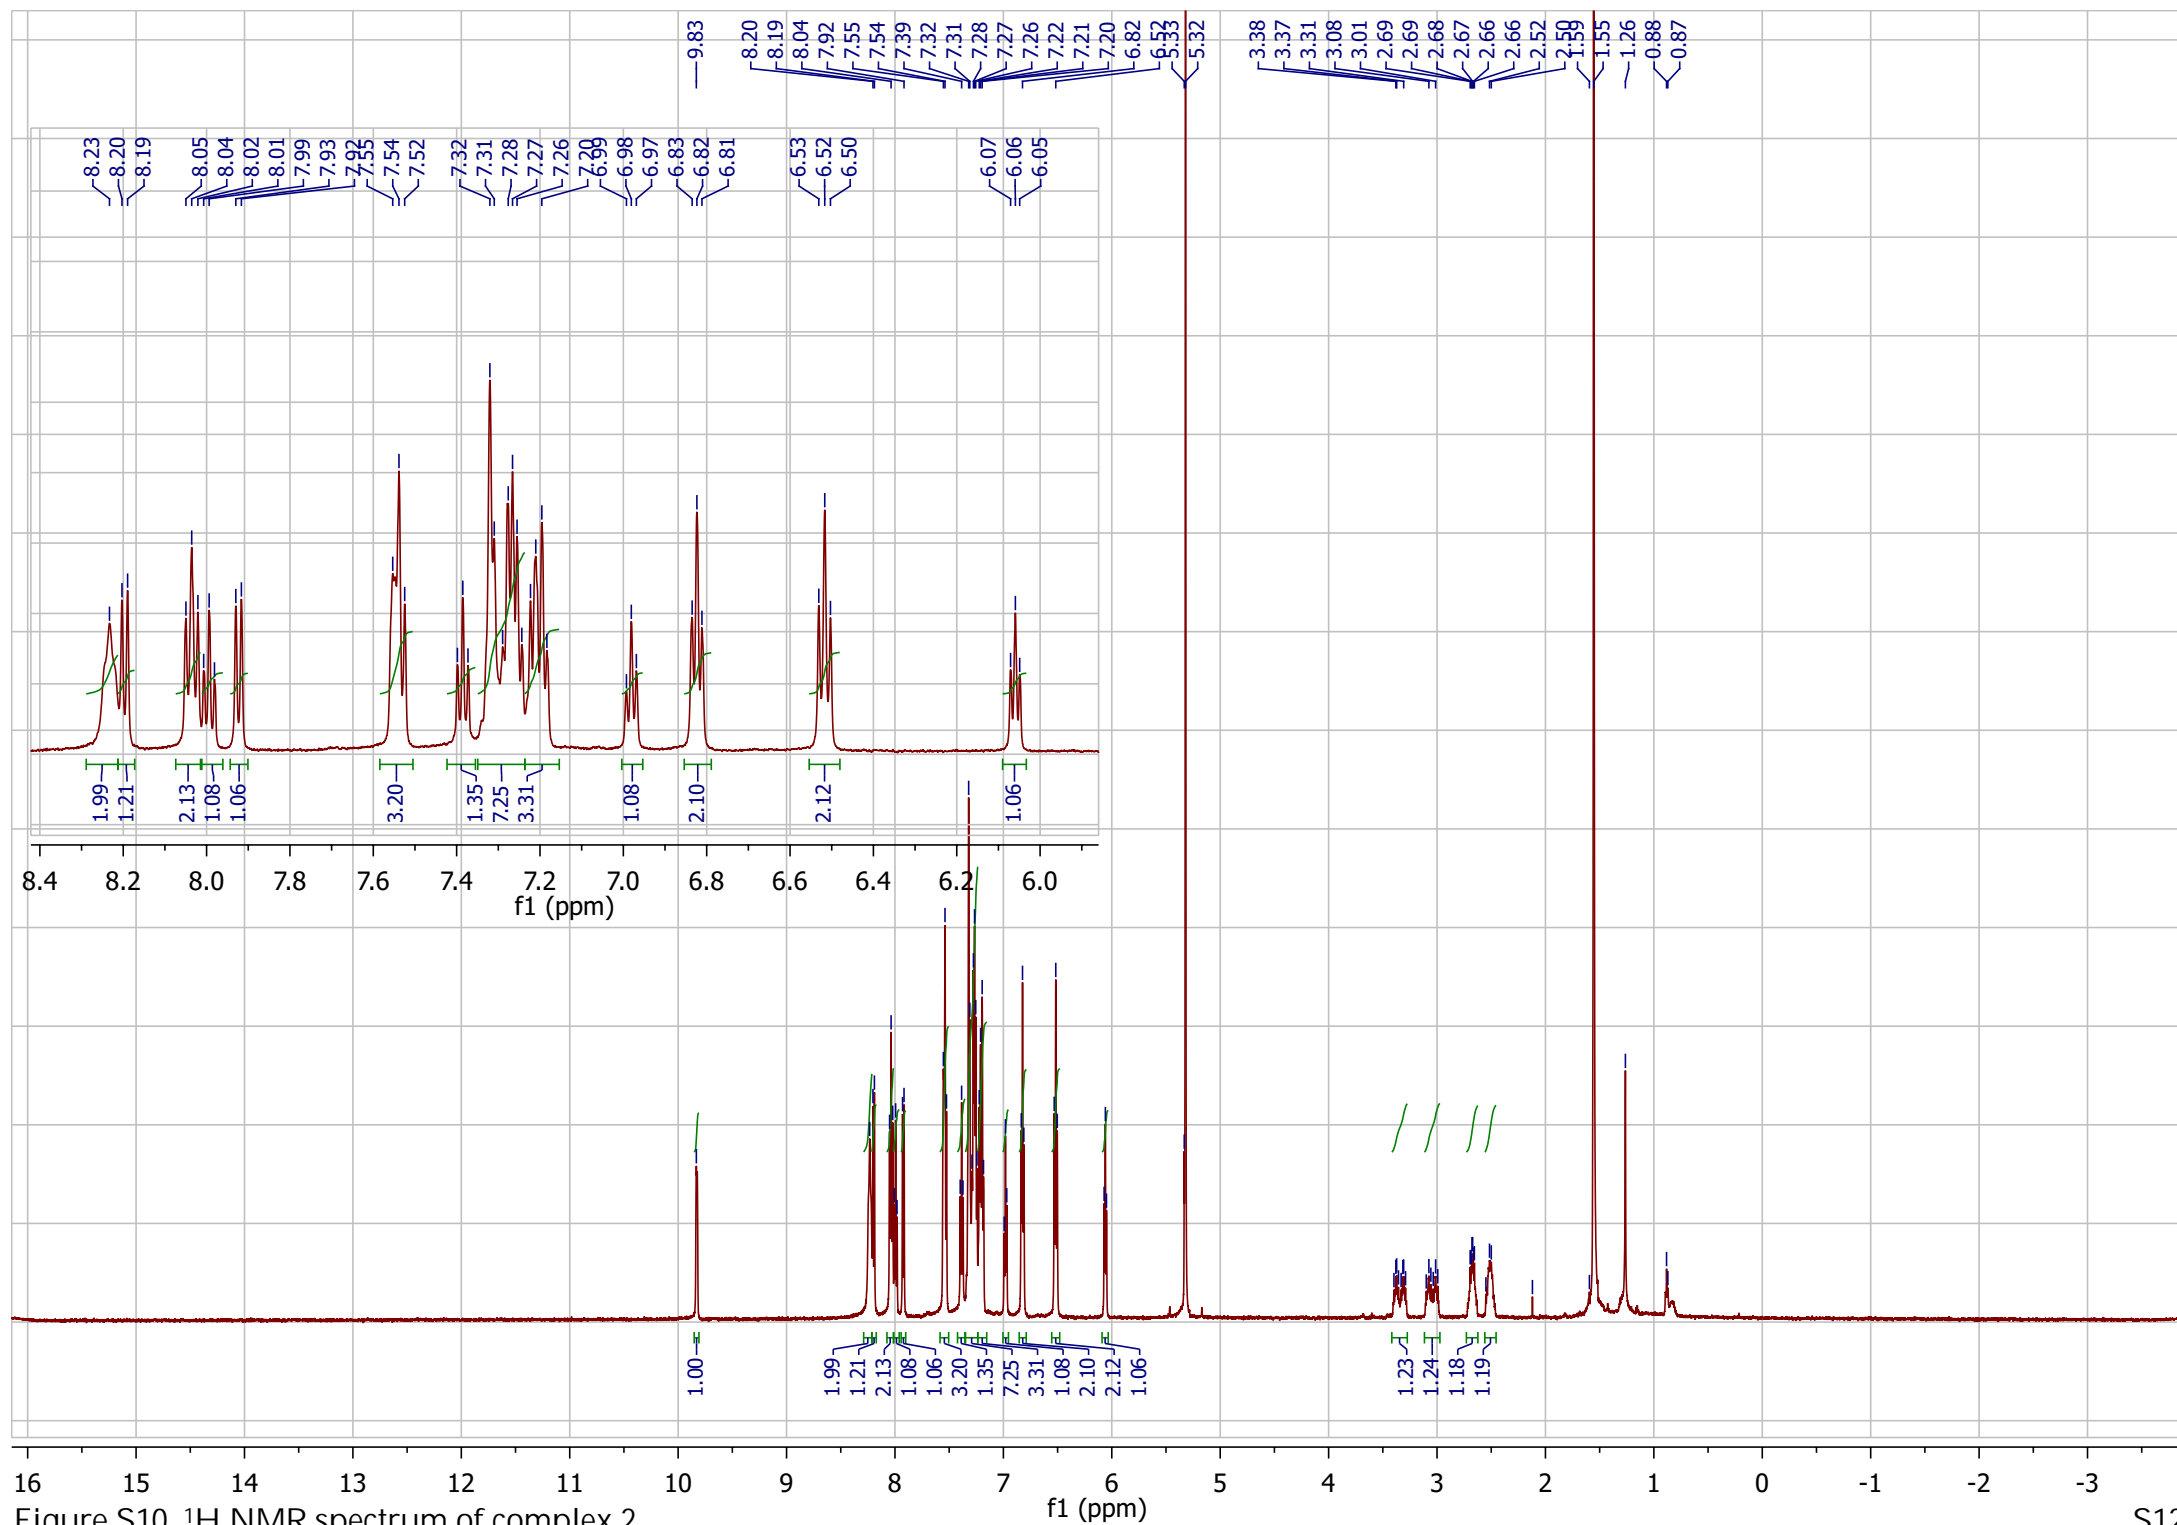



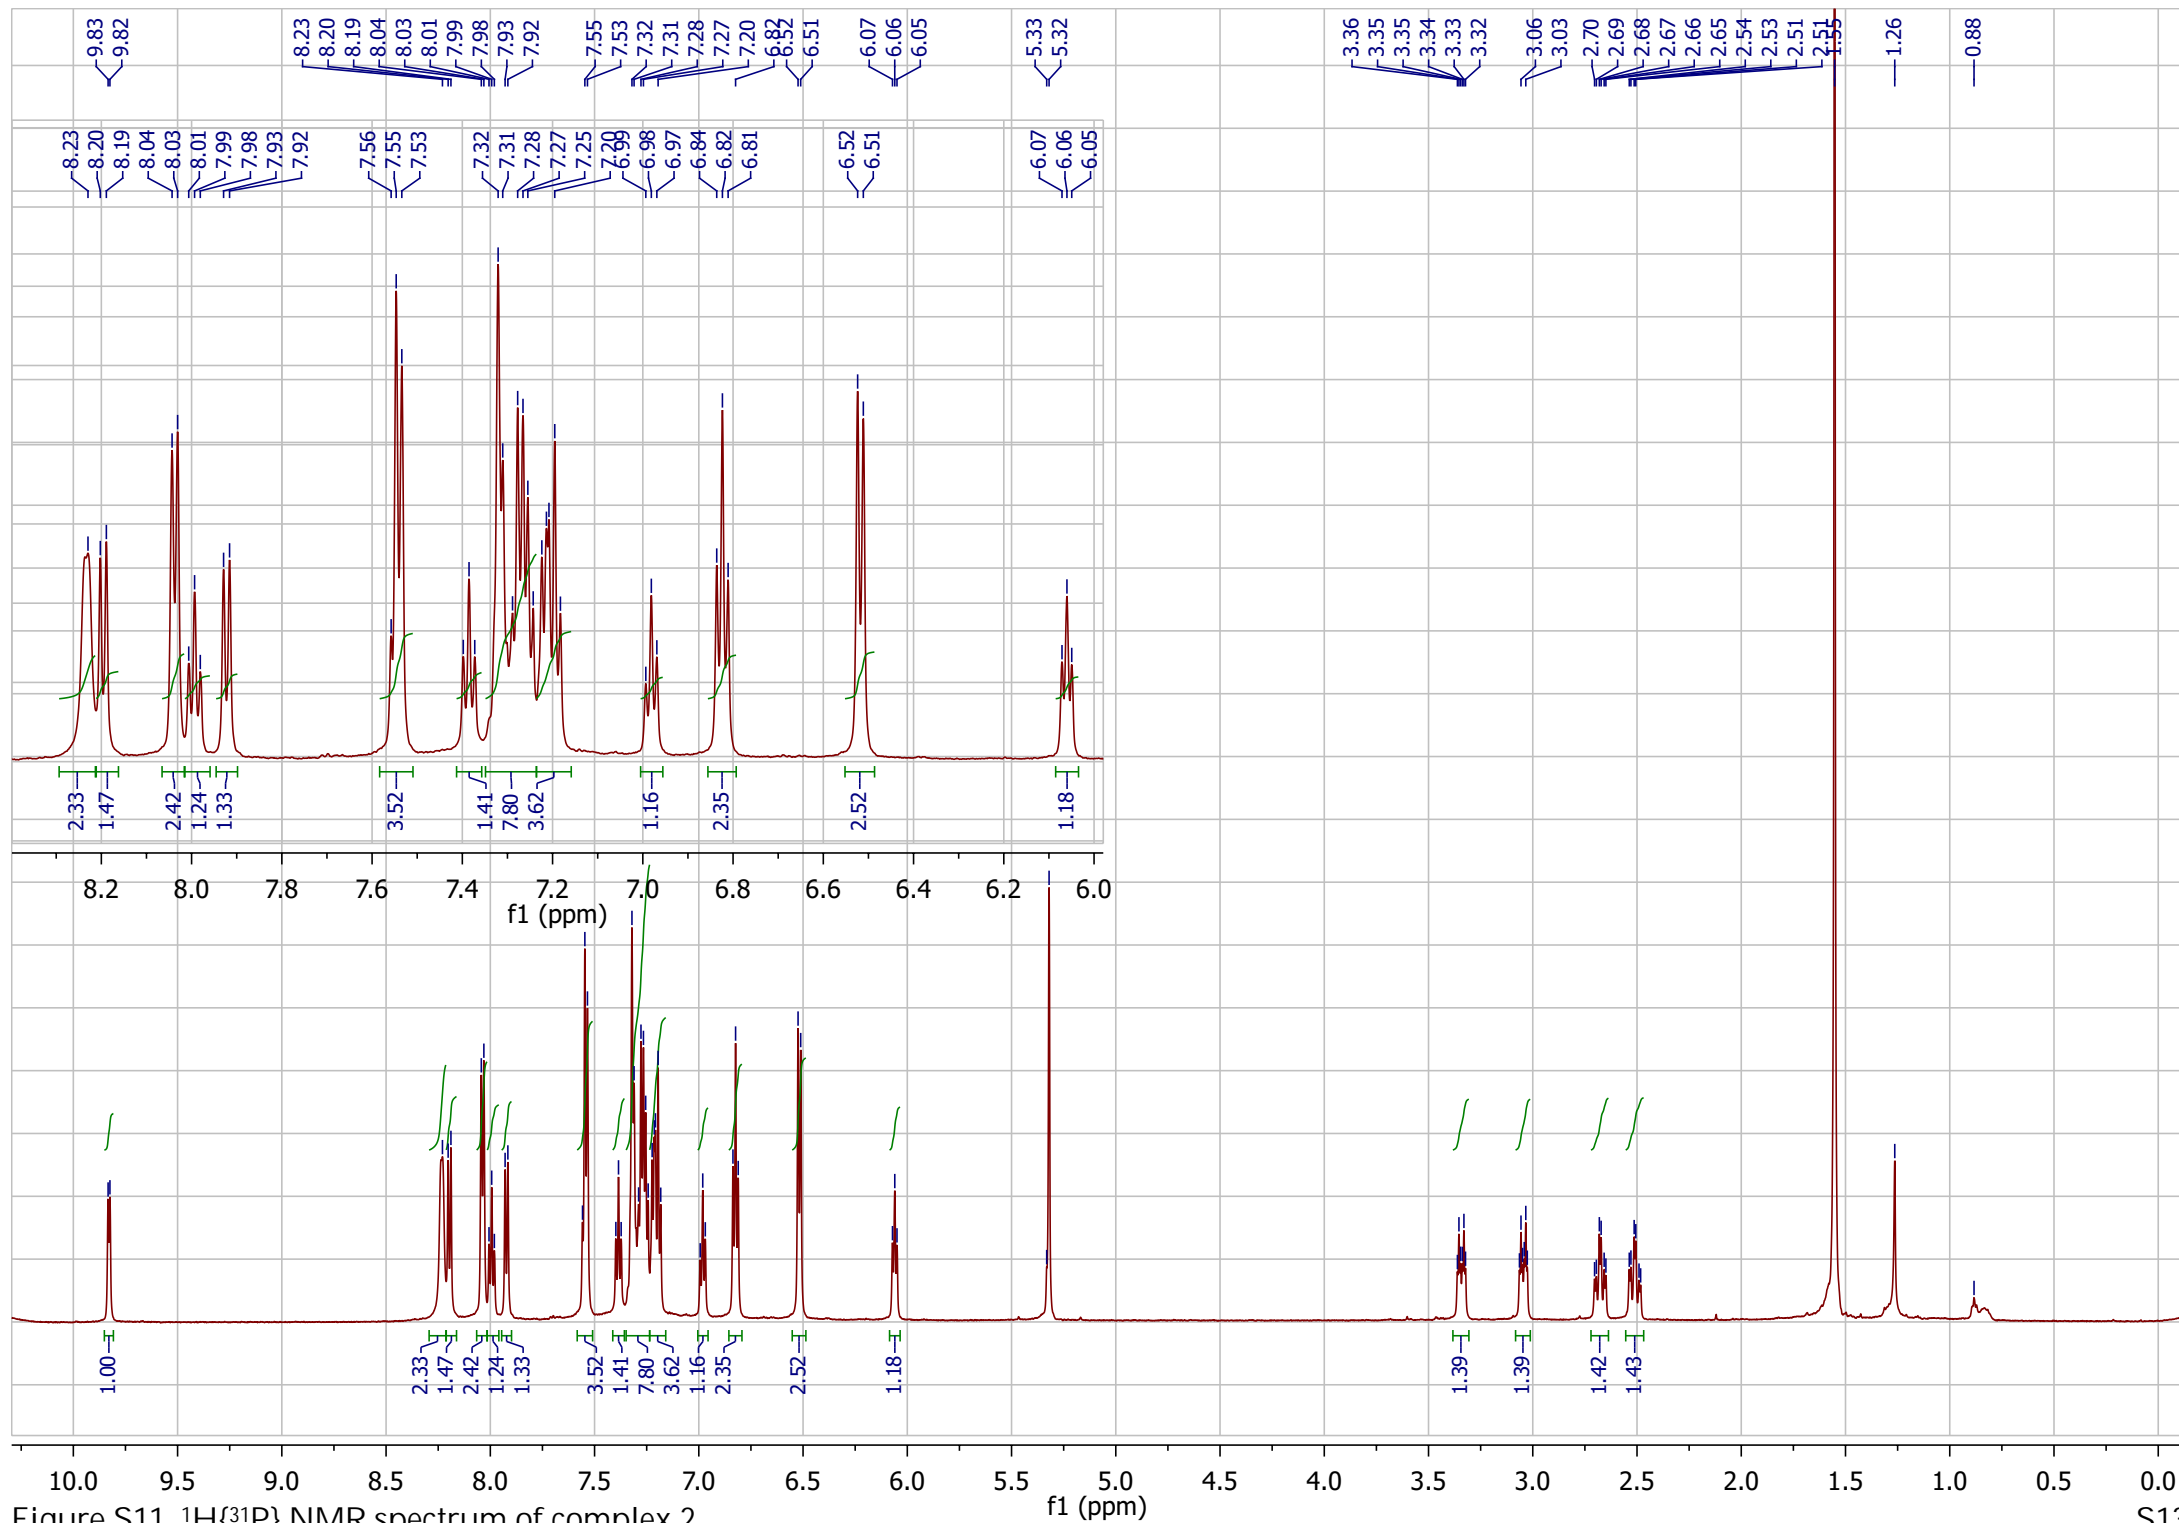

Figure S11.  $^1\text{H}\{^{31}\text{P}\}$  NMR spectrum of complex 2.

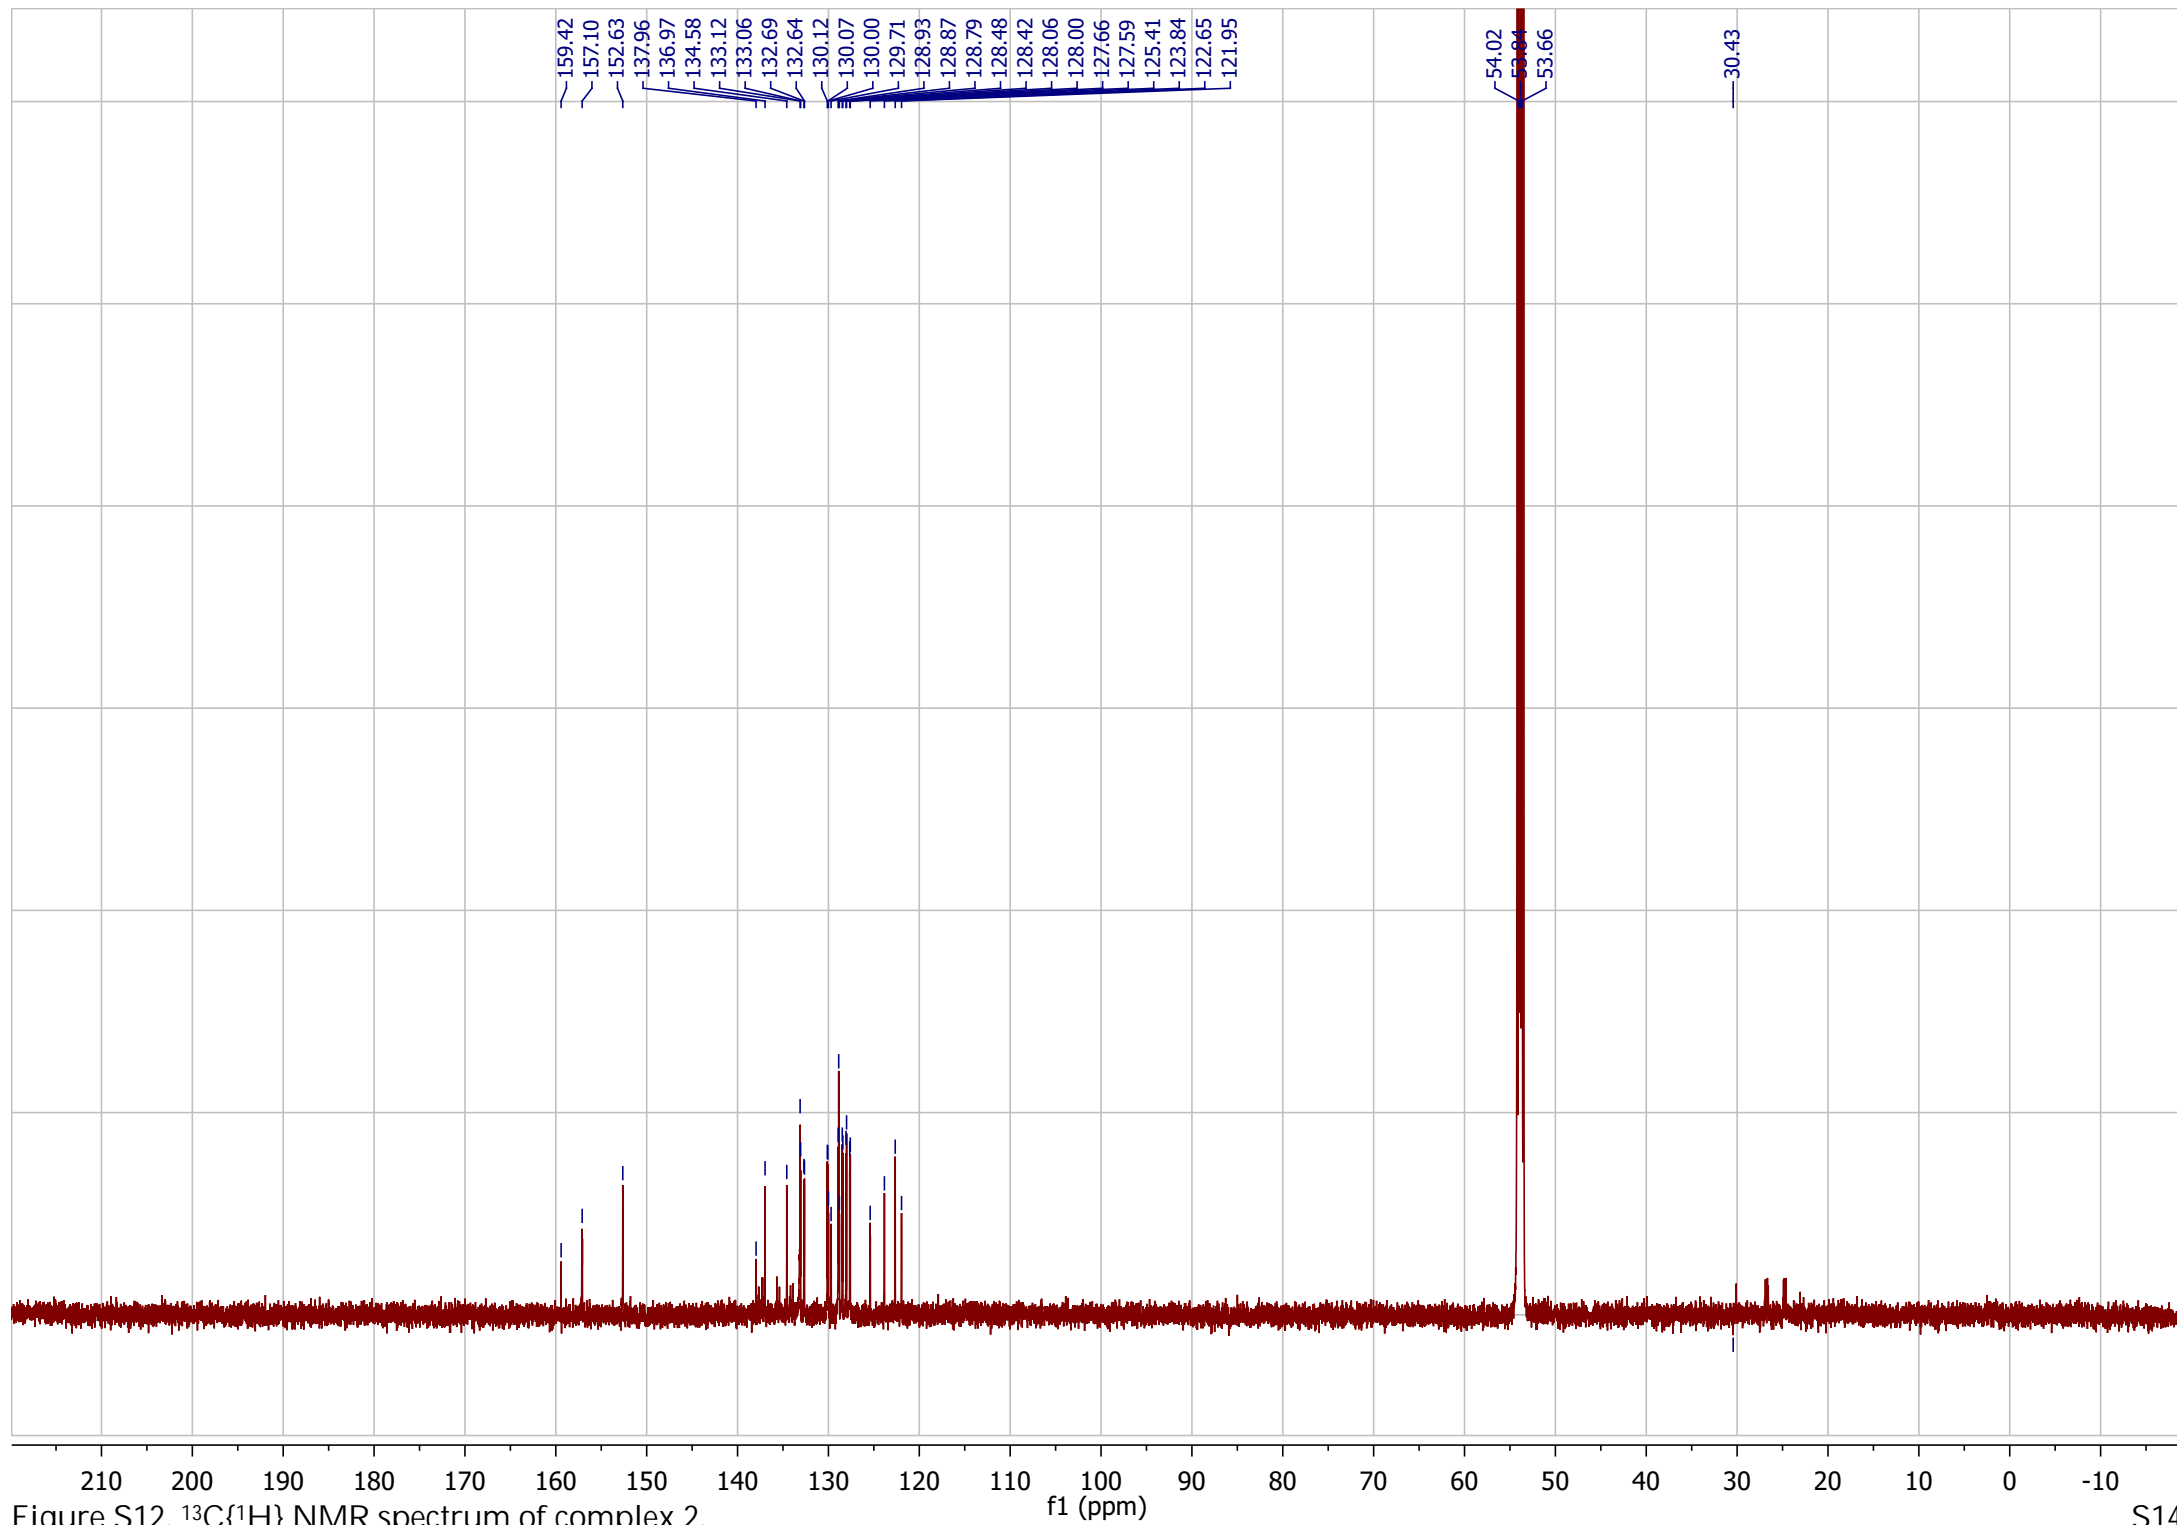

Figure S12.  $^{13}\text{C}\{^1\text{H}\}$  NMR spectrum of complex 2.

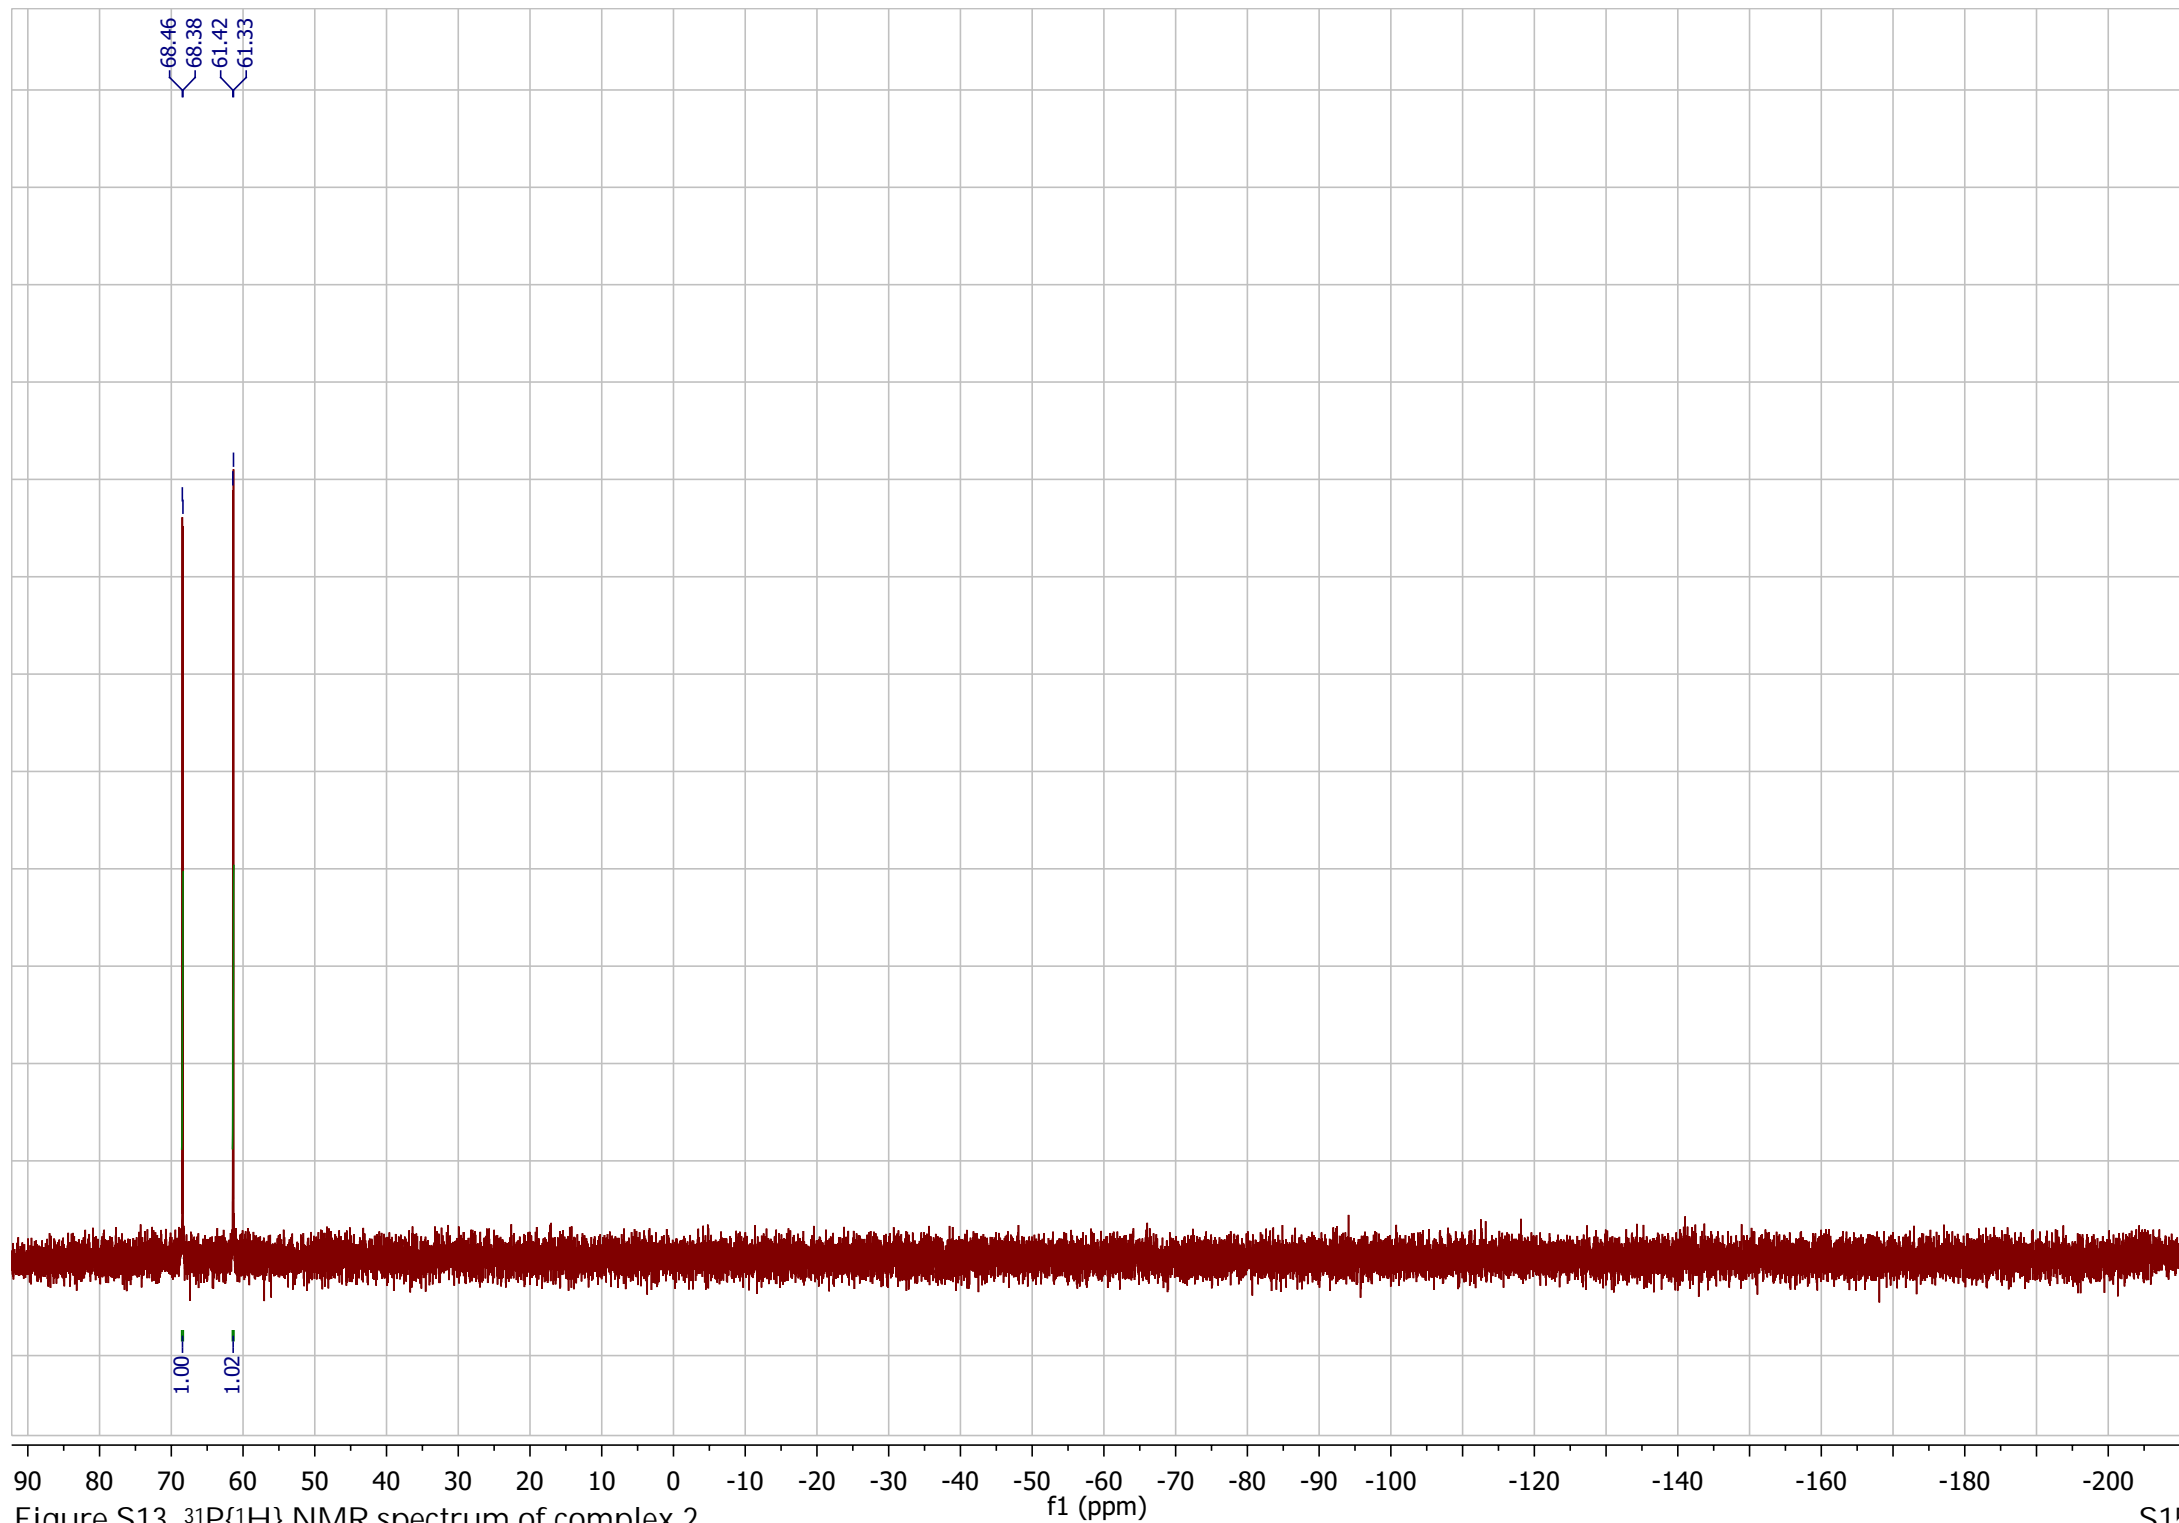

Figure S13.  $^{31}\text{P}\{^1\text{H}\}$  NMR spectrum of complex 2.

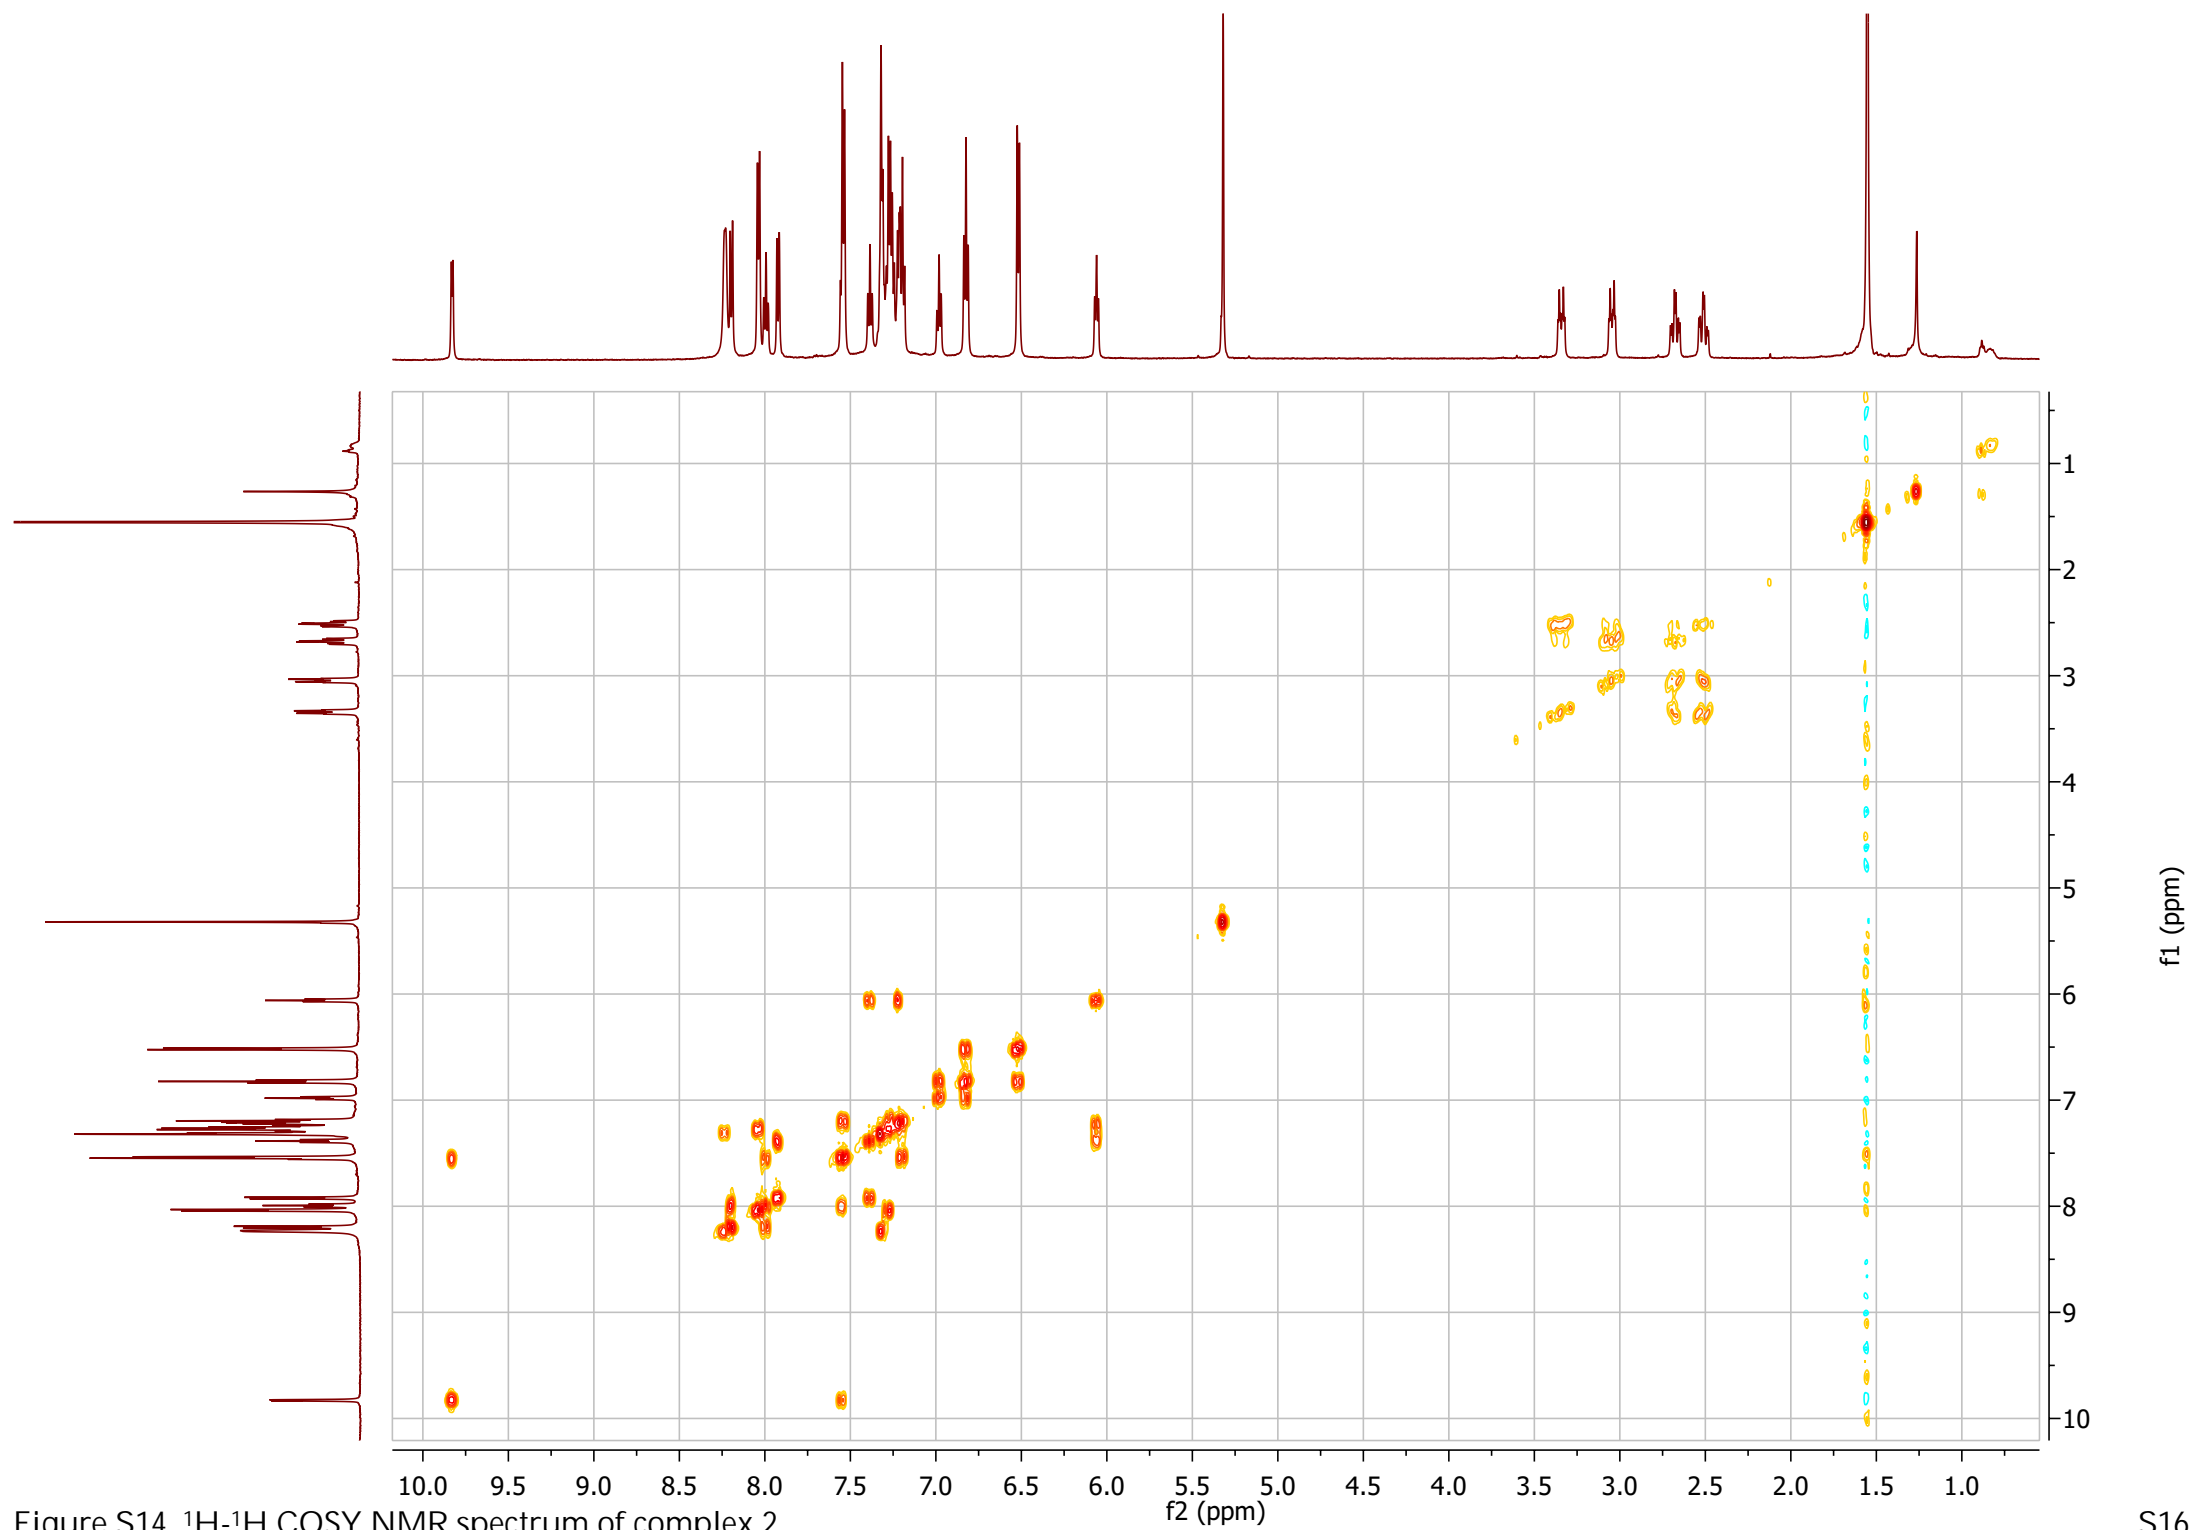

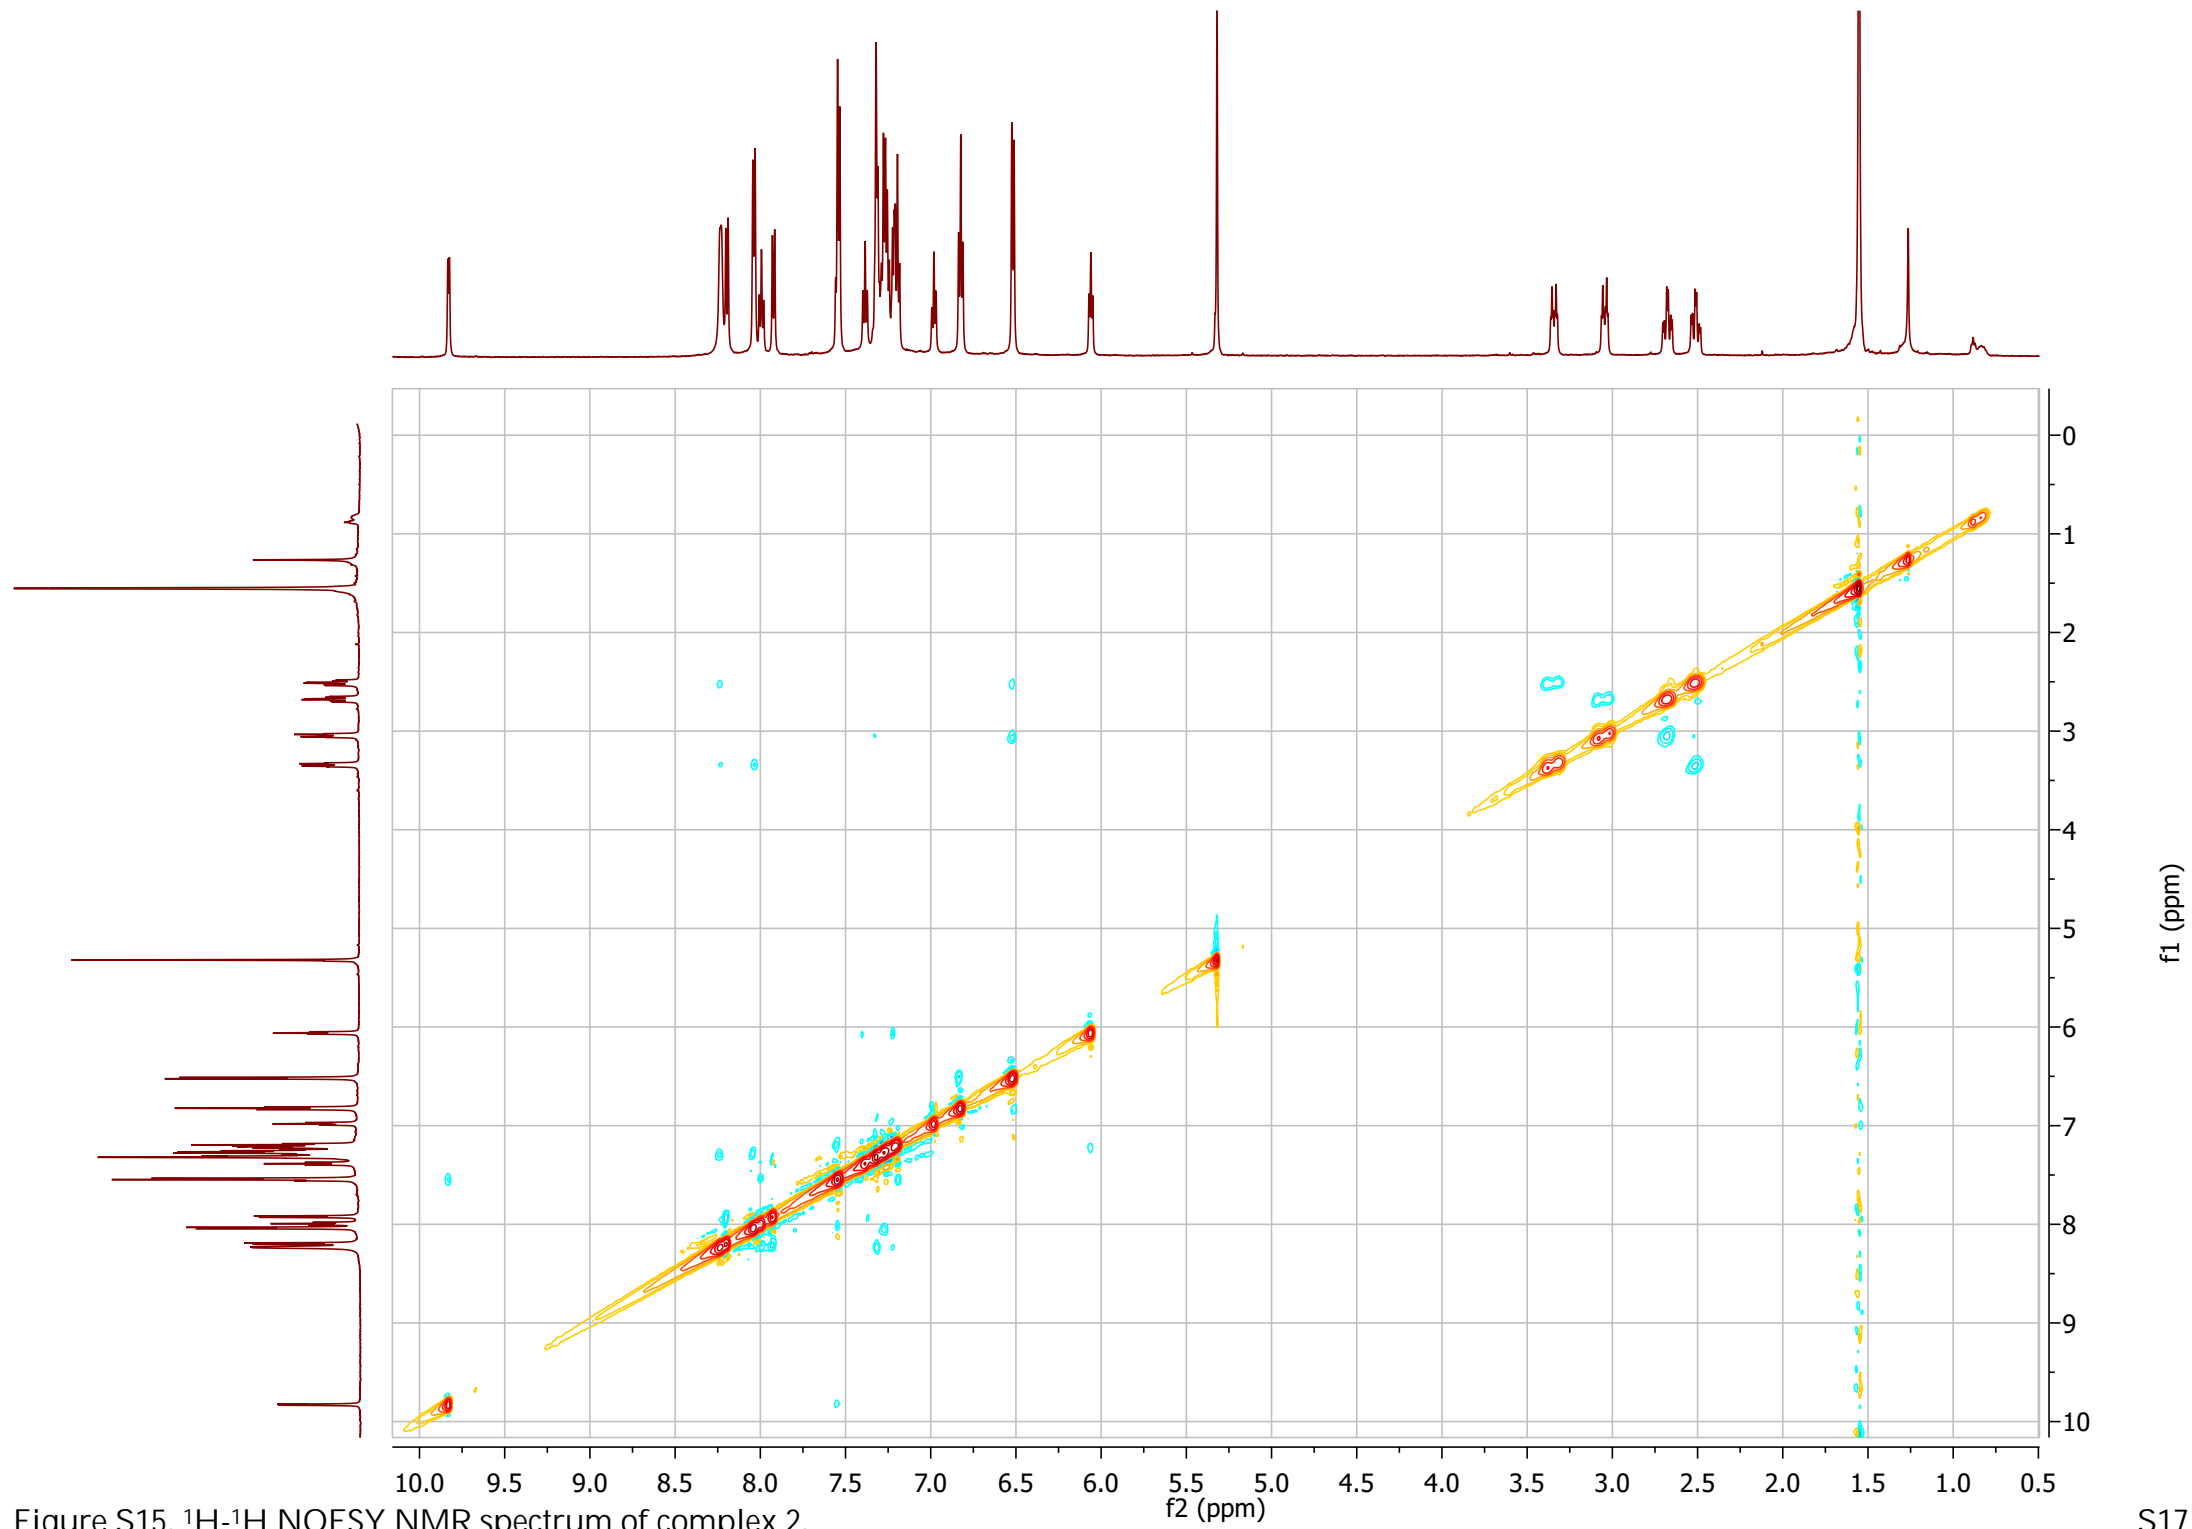

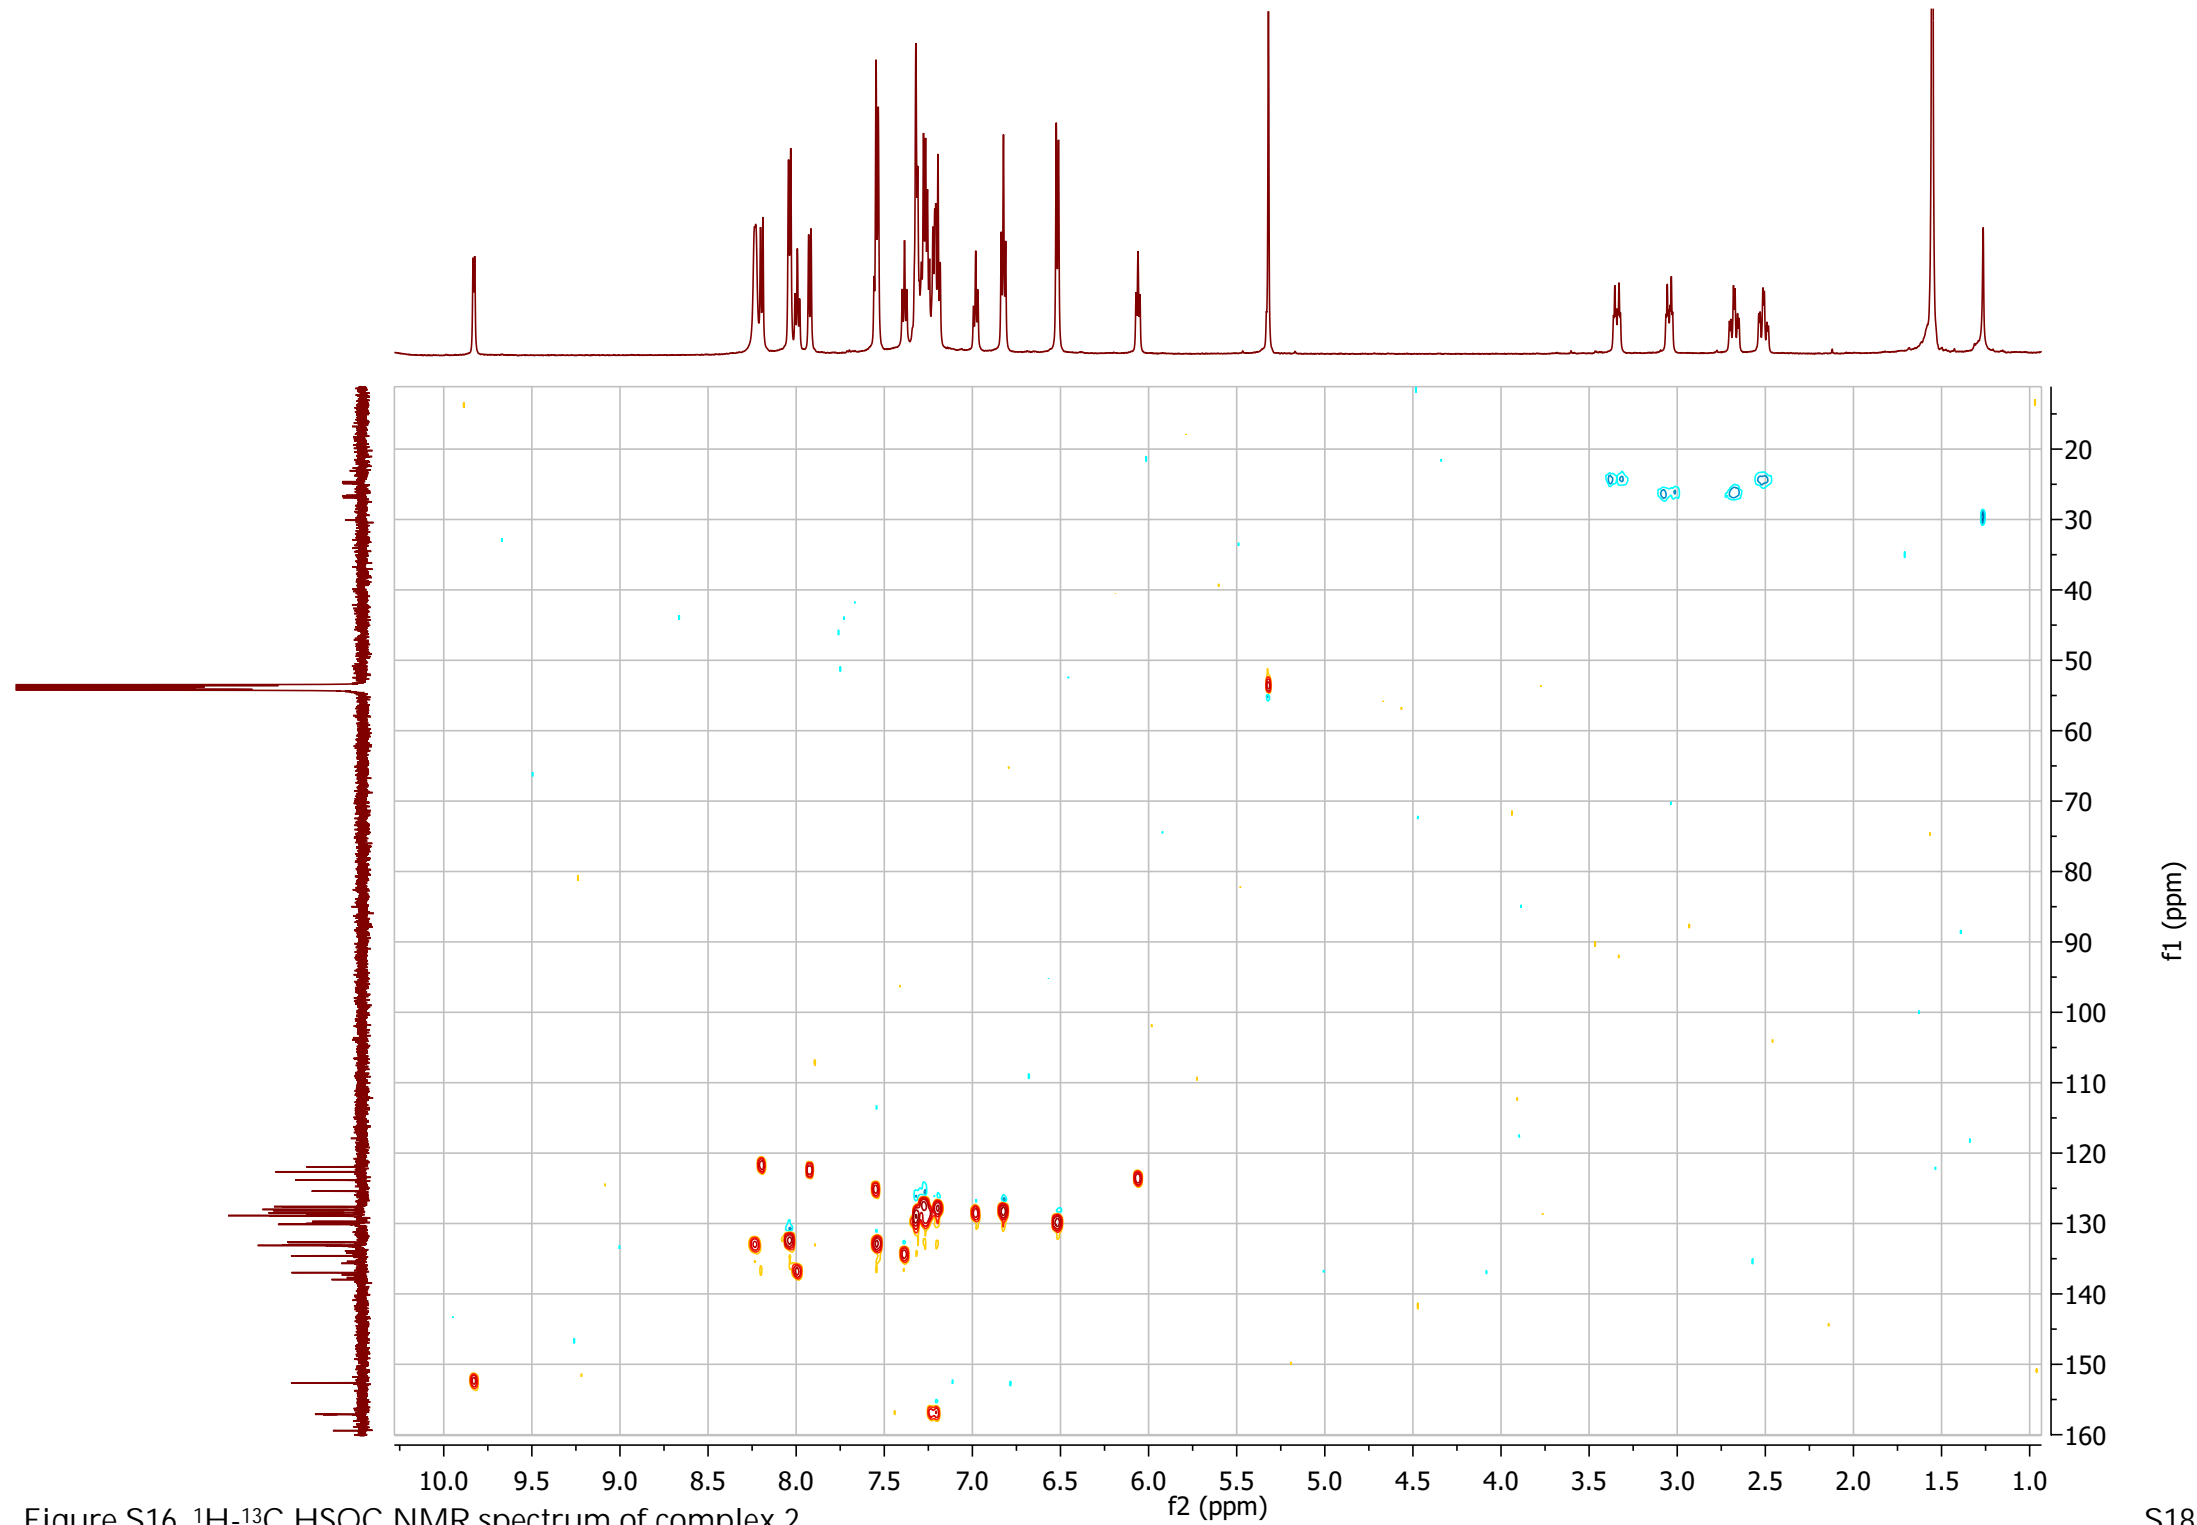

Figure S16.  $^1\text{H}$ - $^{13}\text{C}$  HSQC NMR spectrum of complex 2.

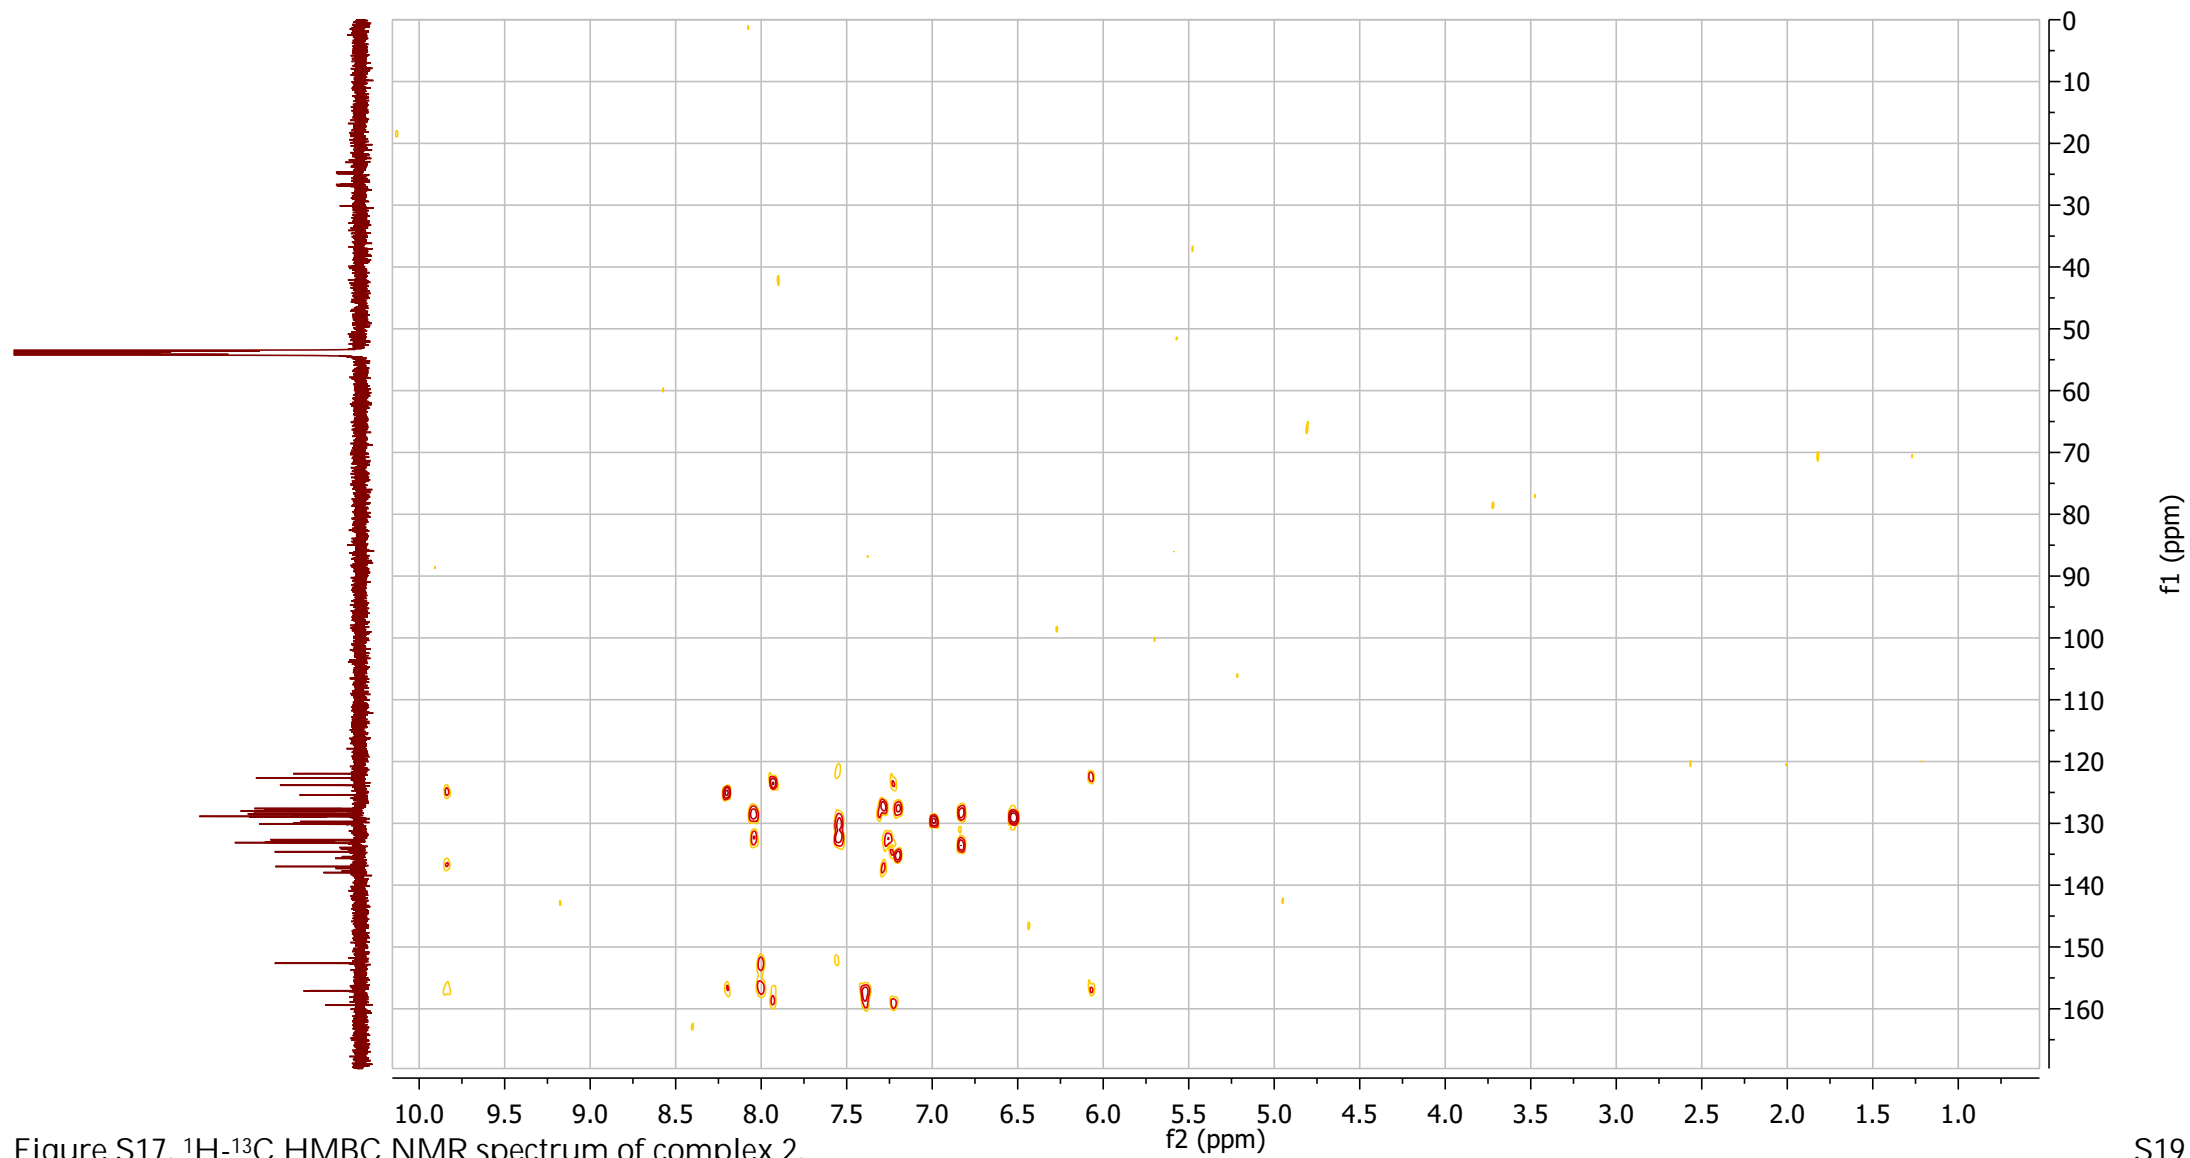

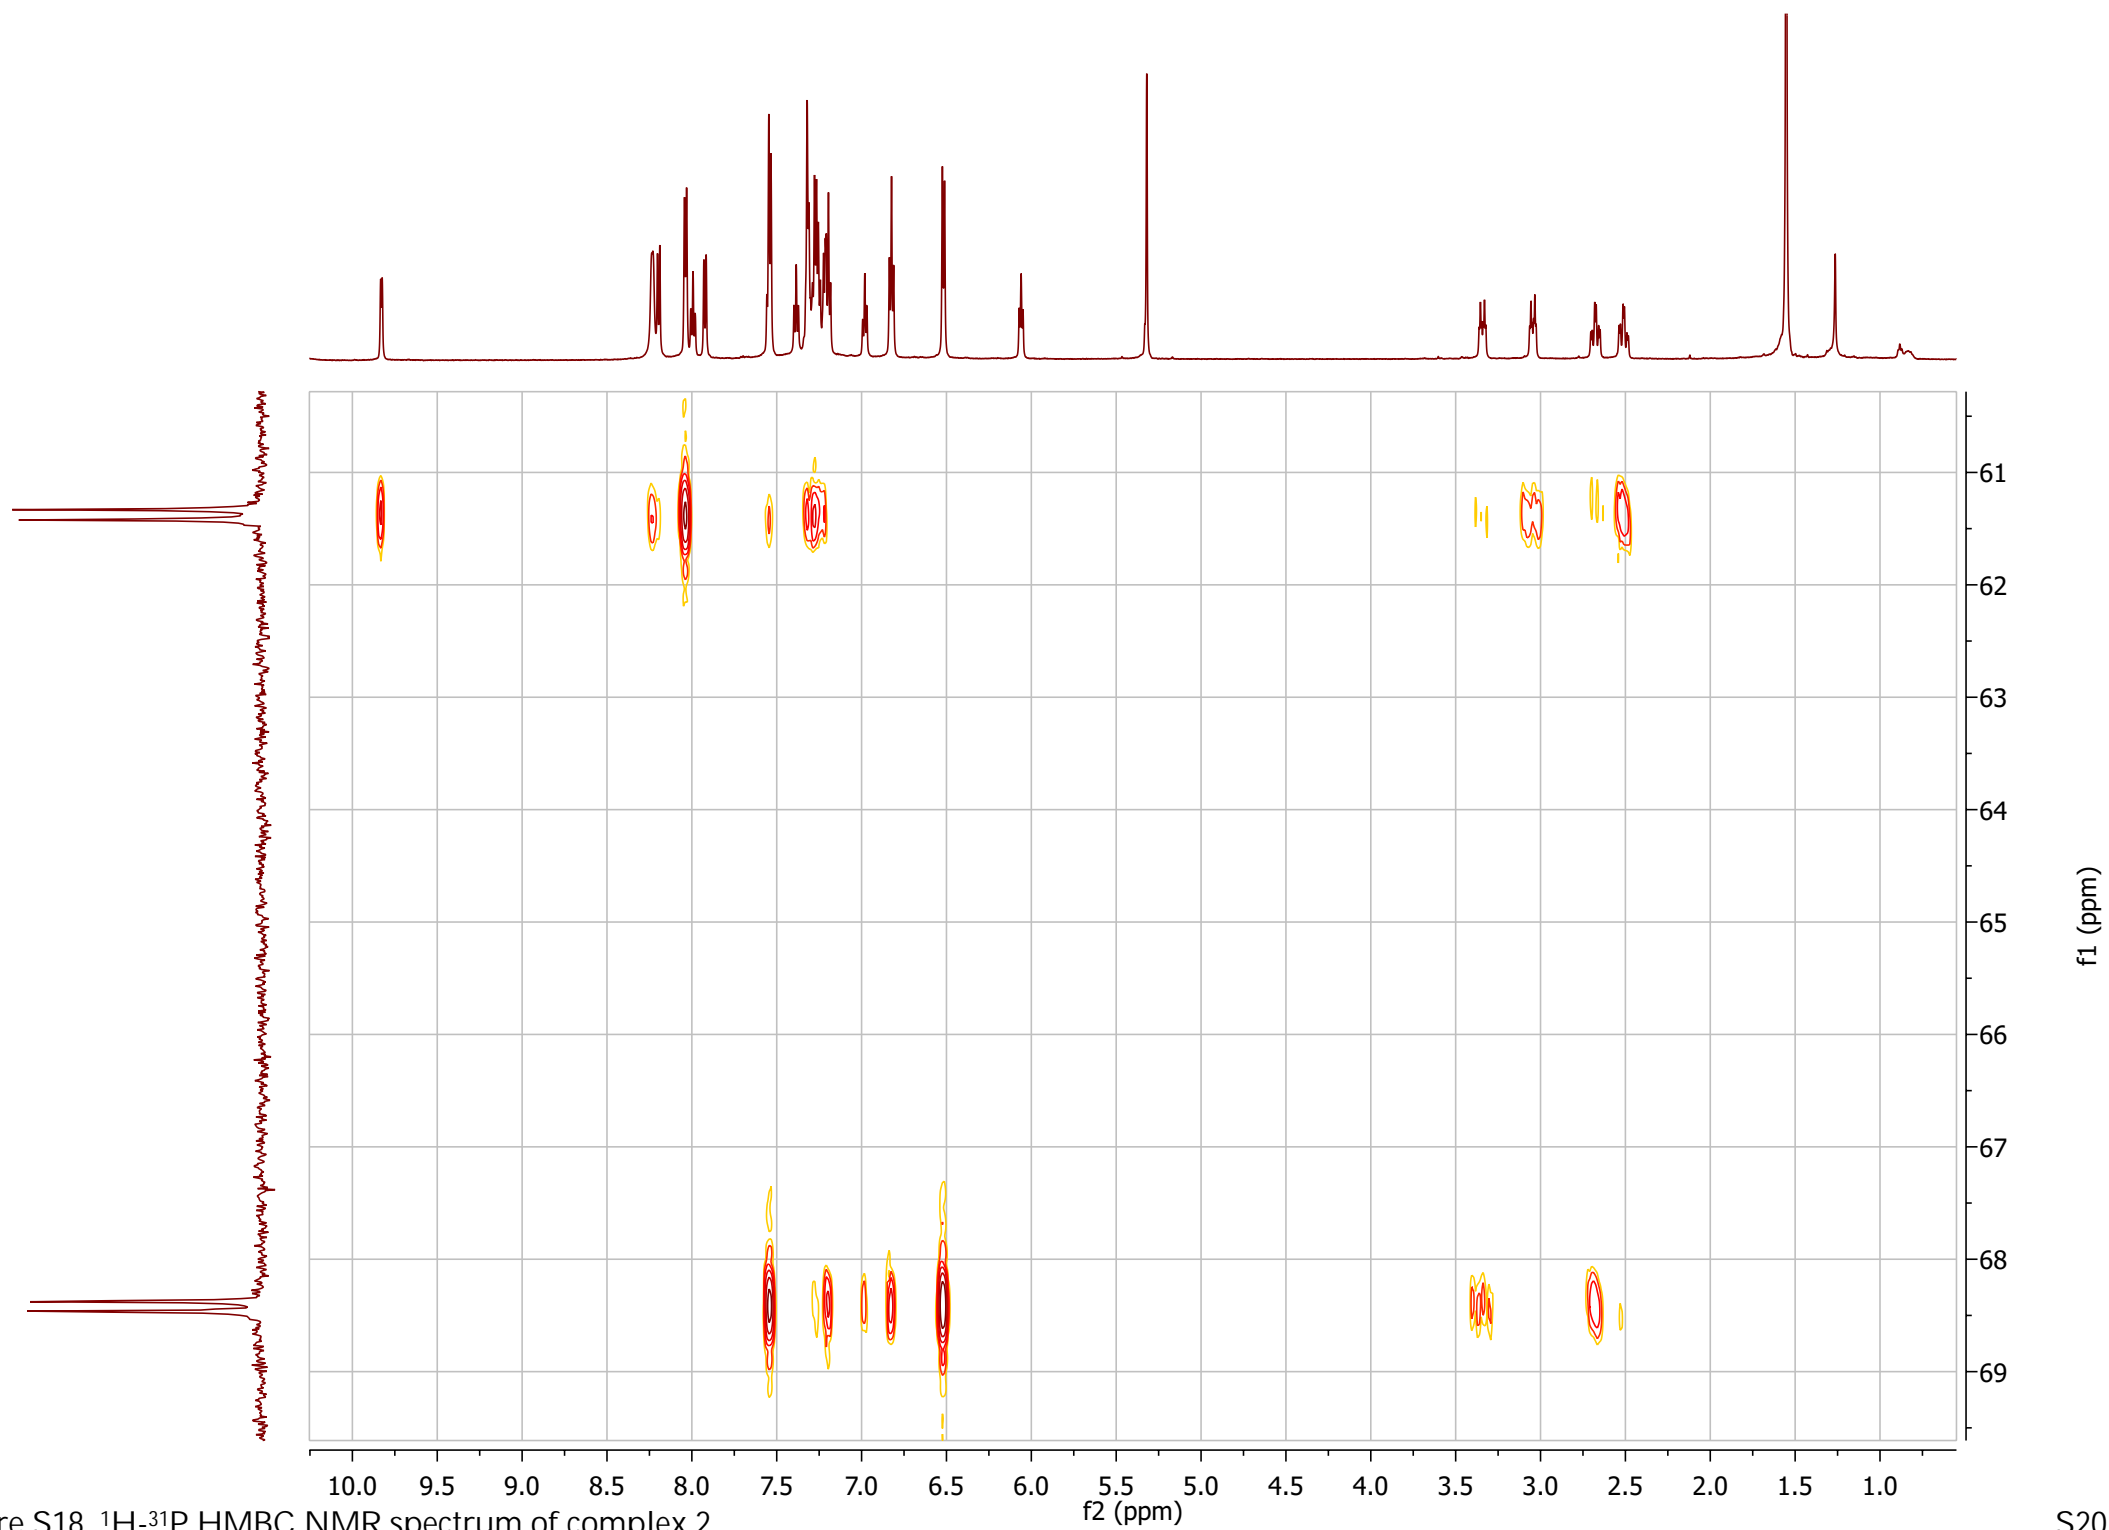

Figure S18.  $^1\text{H}$ - $^{31}\text{P}$  HMBC NMR spectrum of complex 2.



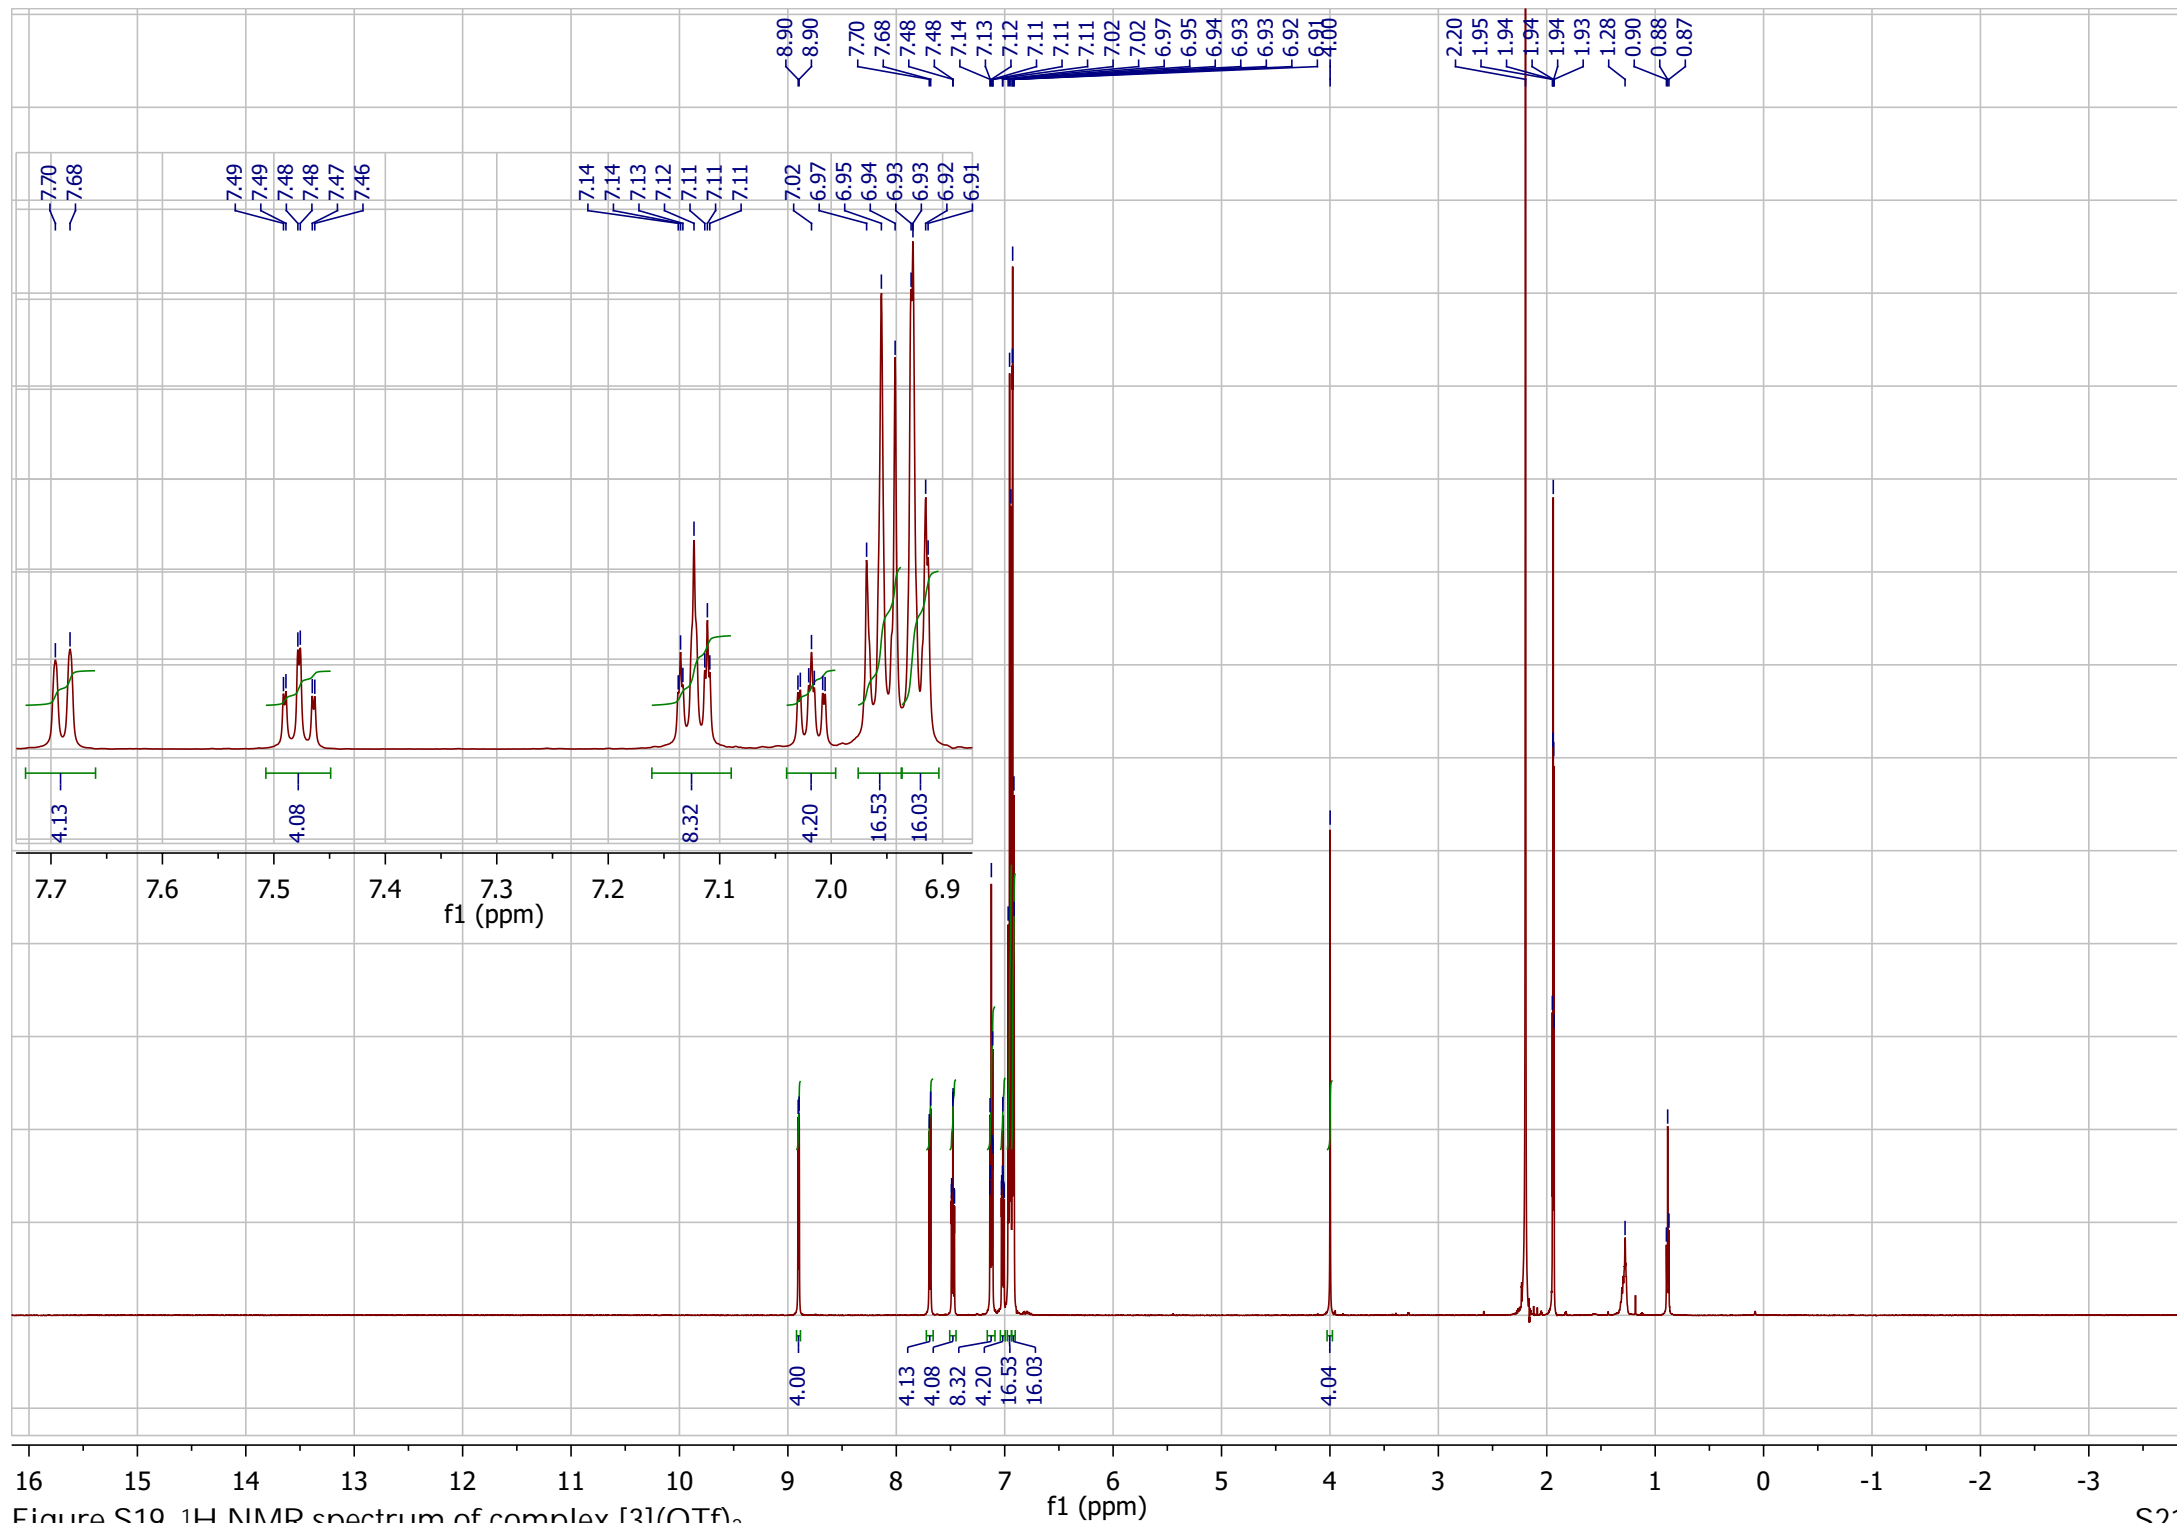

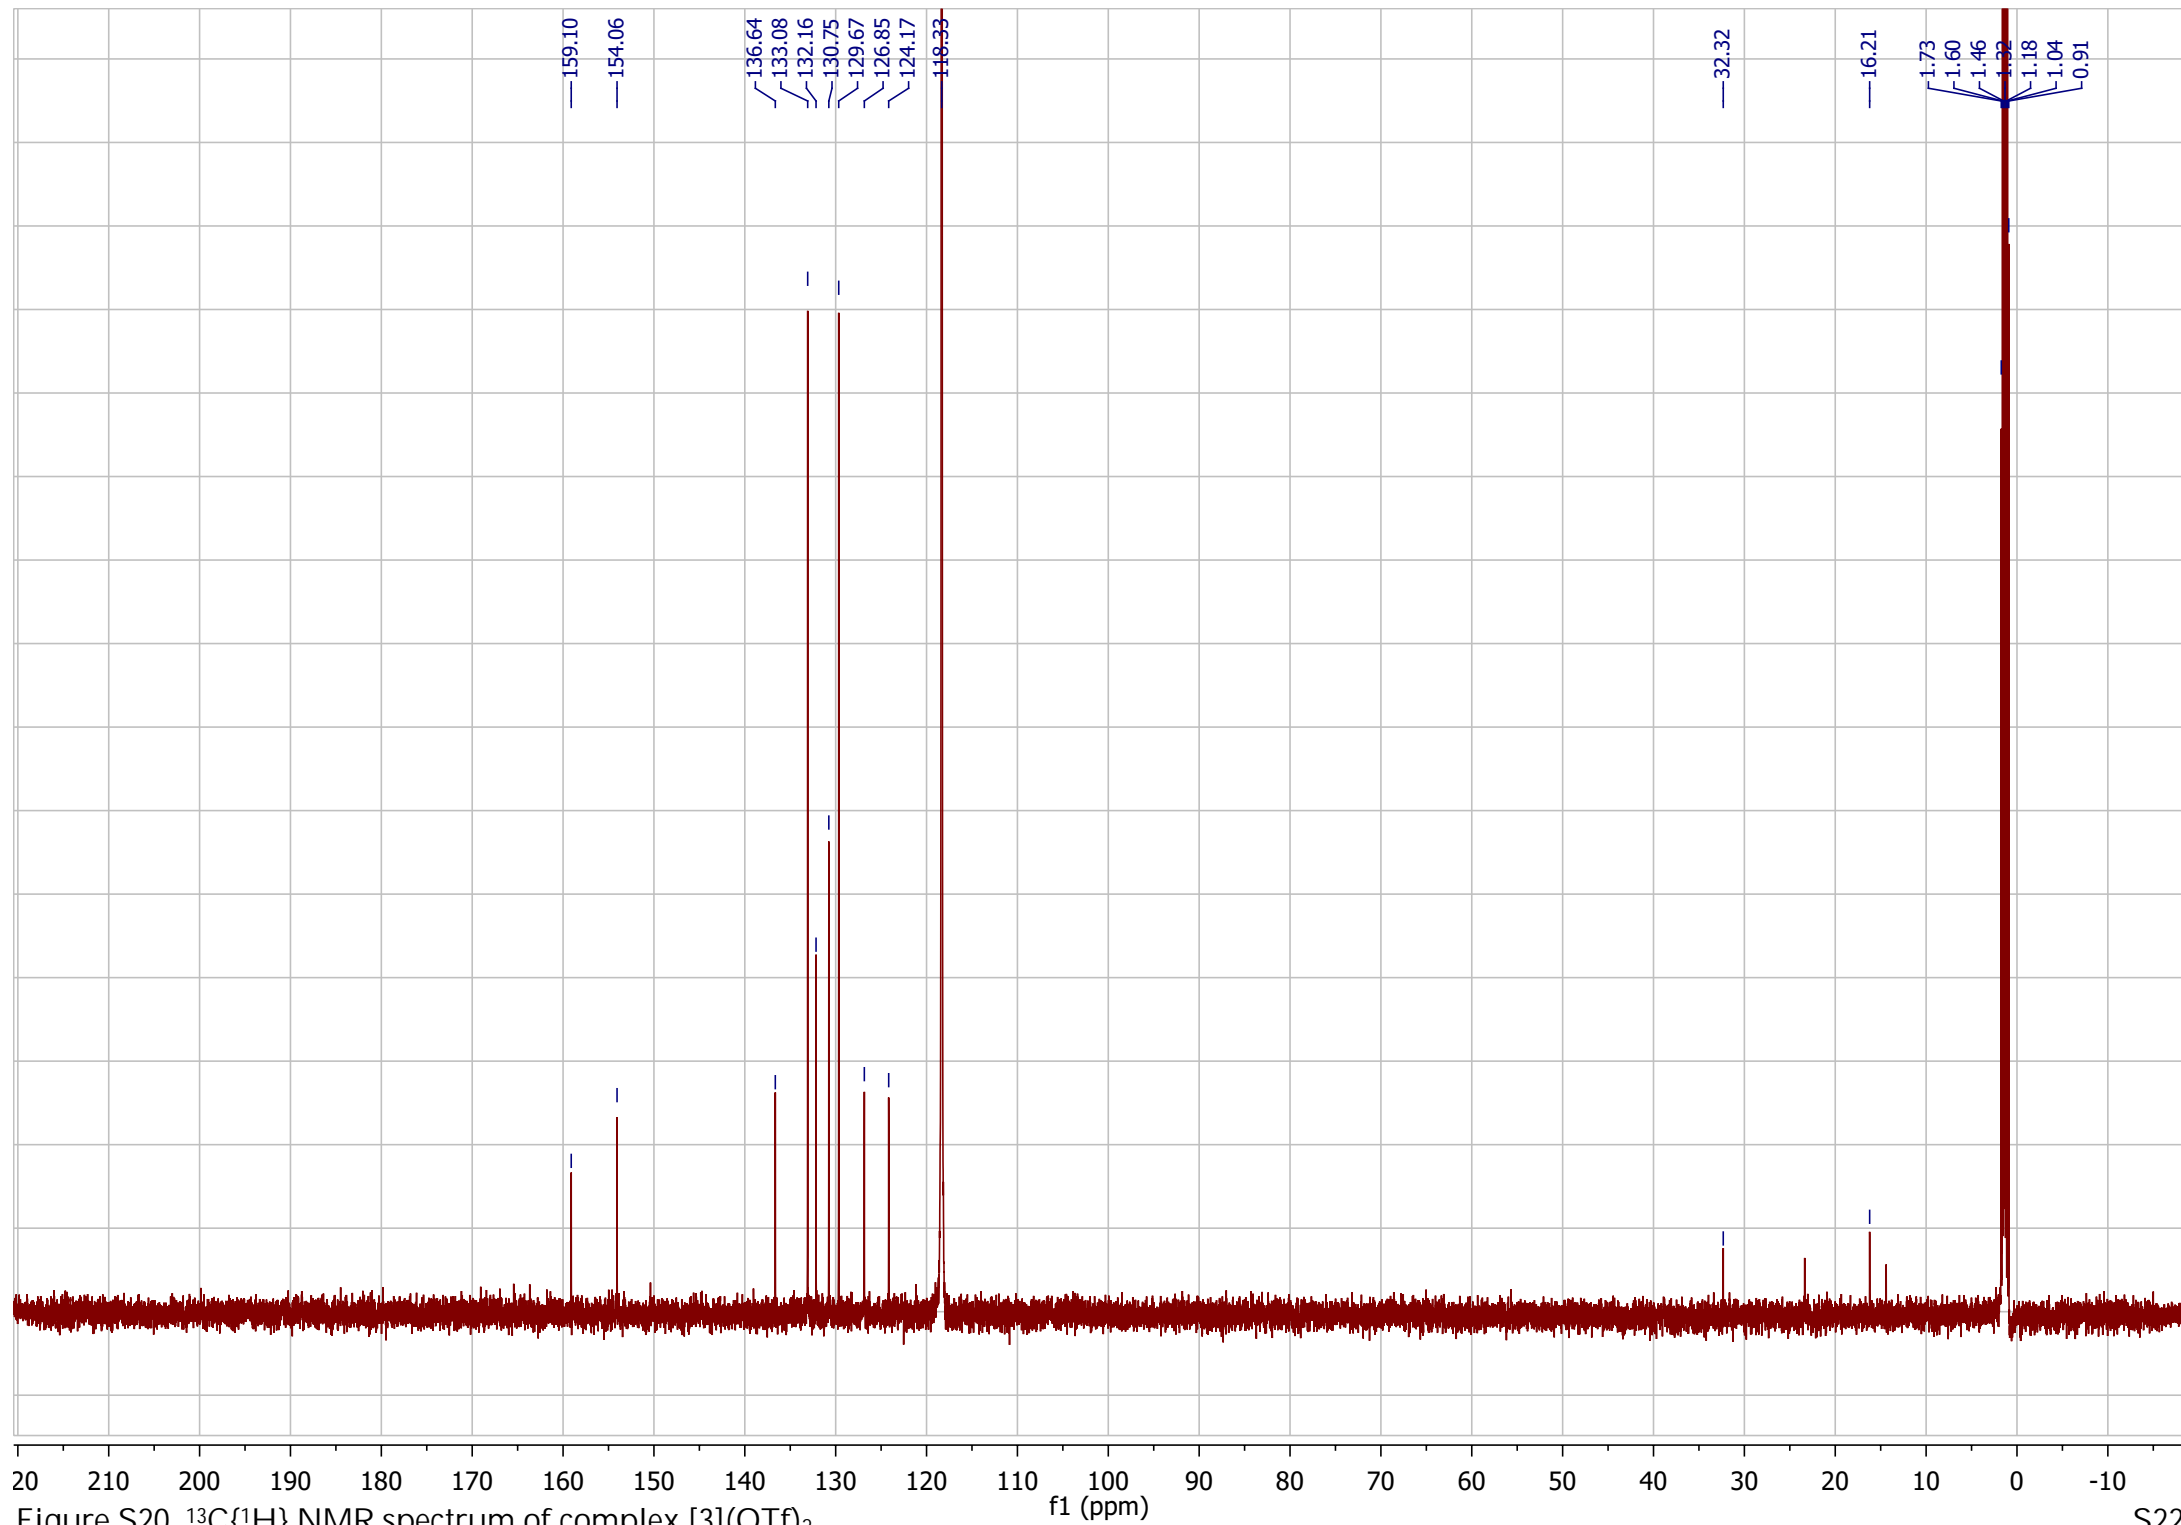

Figure S20.  $^{13}\text{C}\{^1\text{H}\}$  NMR spectrum of complex  $[3](\text{OTf})_2$ .

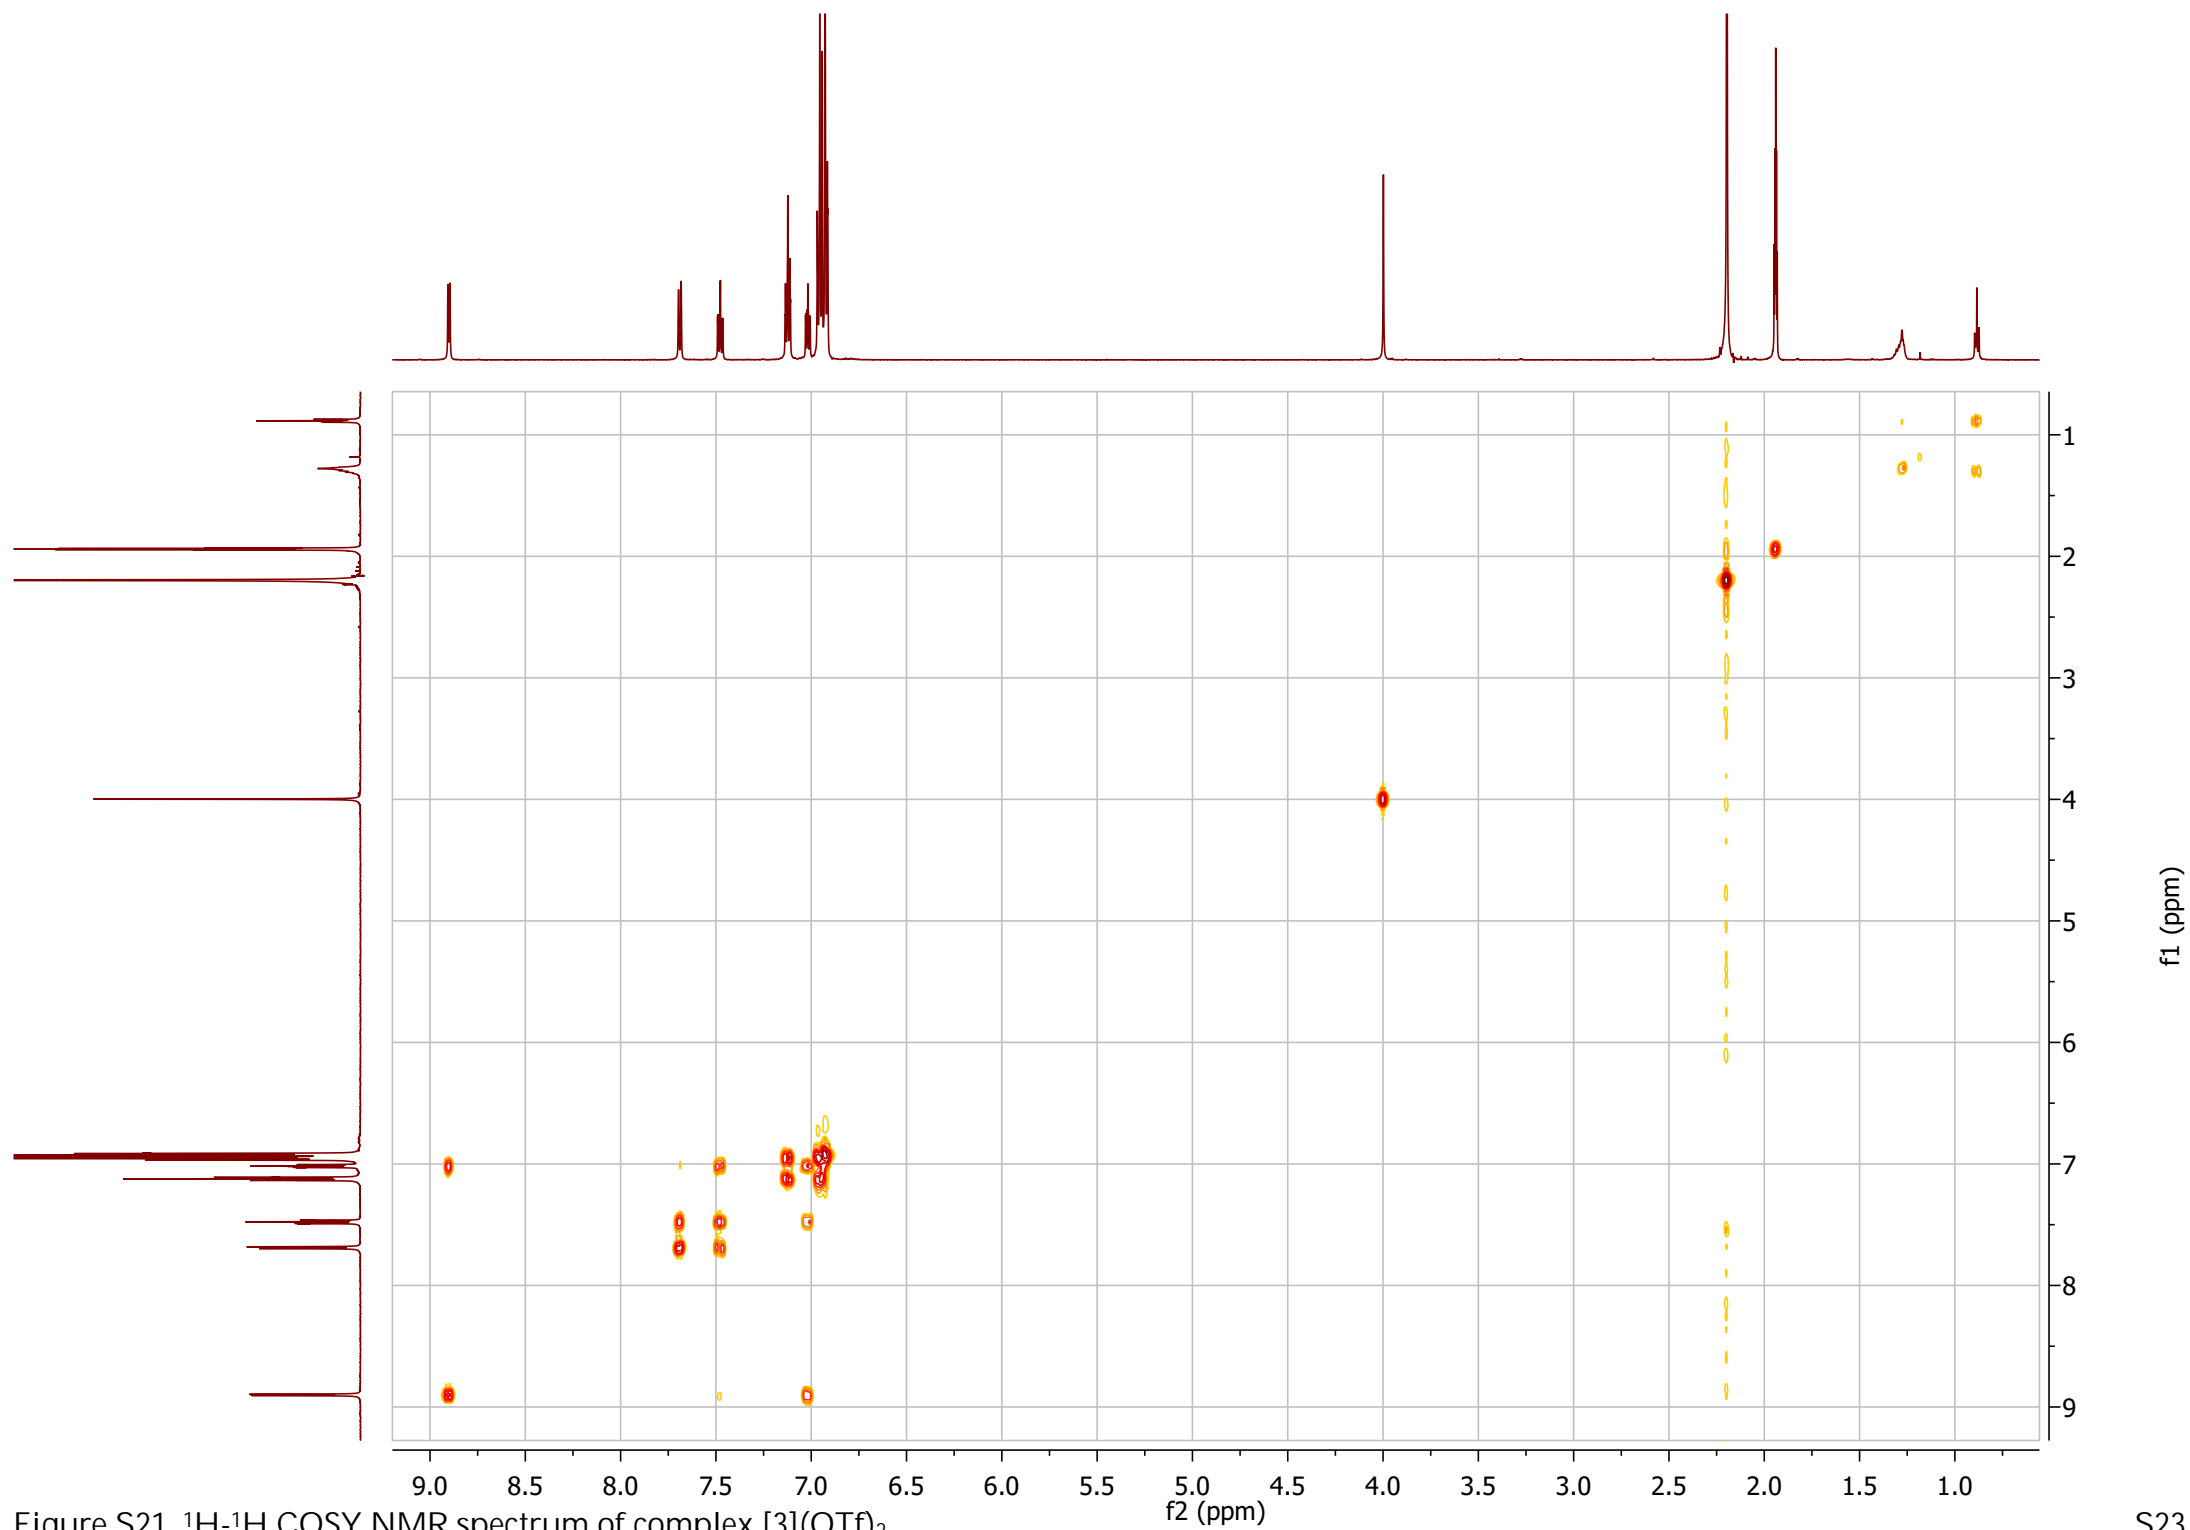

Figure S21.  $^1\text{H}$ - $^1\text{H}$  COSY NMR spectrum of complex  $[3](\text{OTf})_2$ .

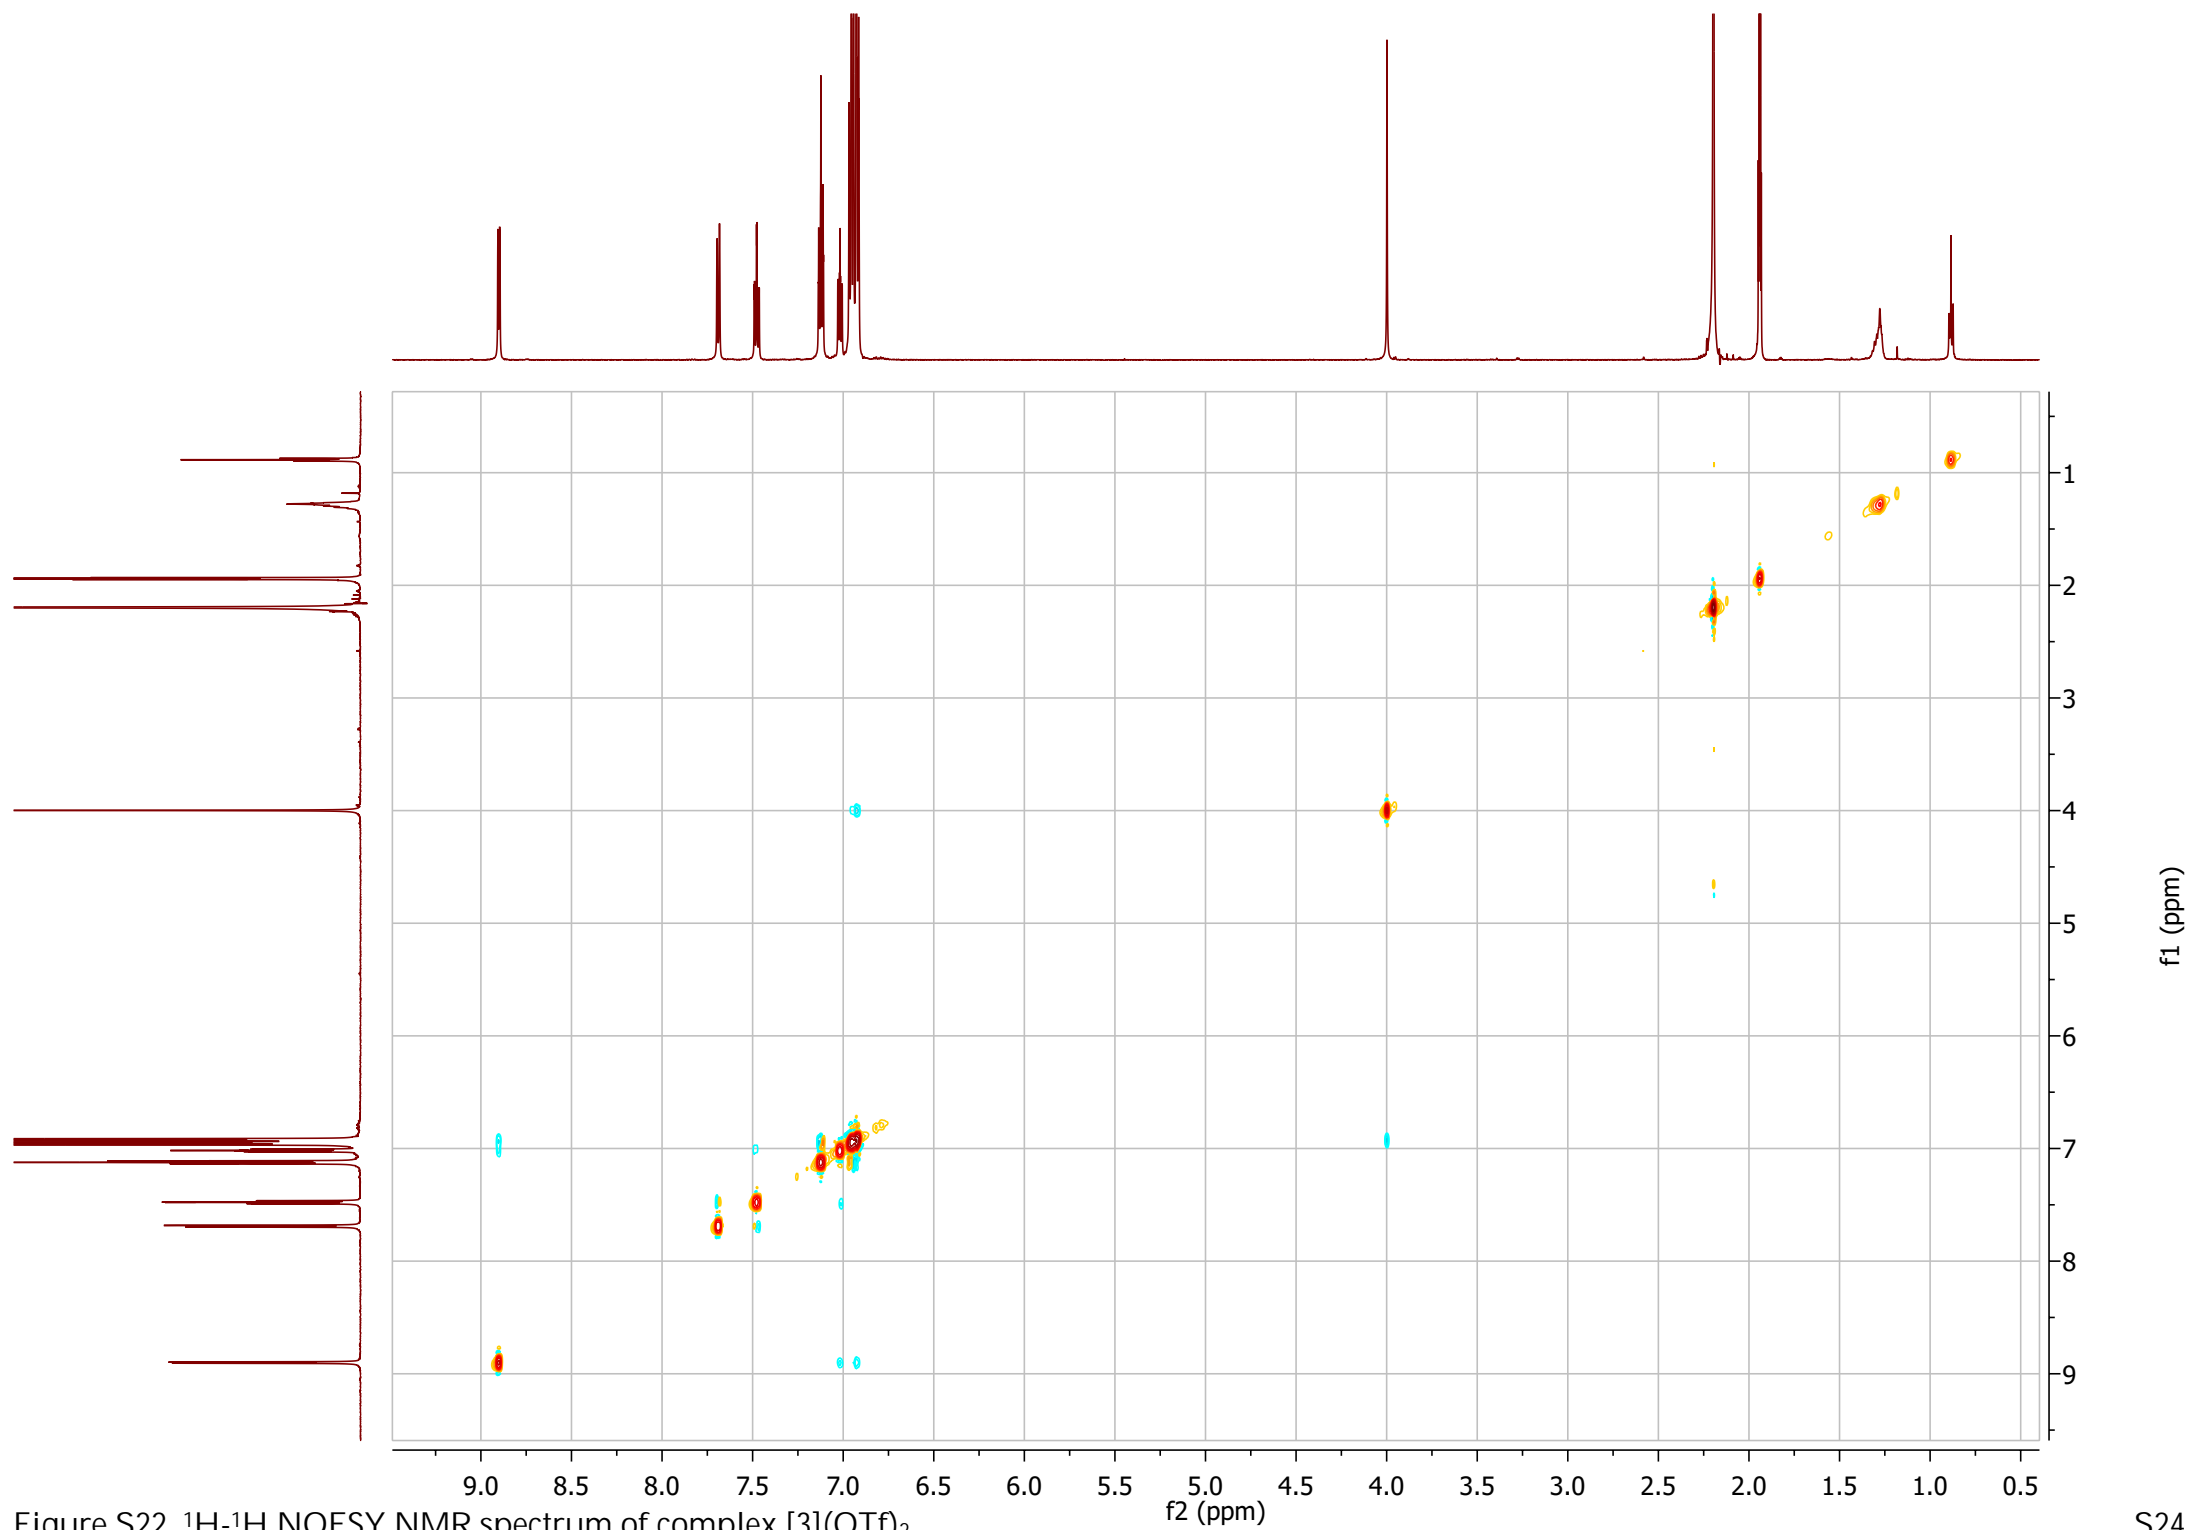

Figure S22.  $^1\text{H}$ - $^1\text{H}$  NOESY NMR spectrum of complex  $[3](\text{OTf})_2$ .

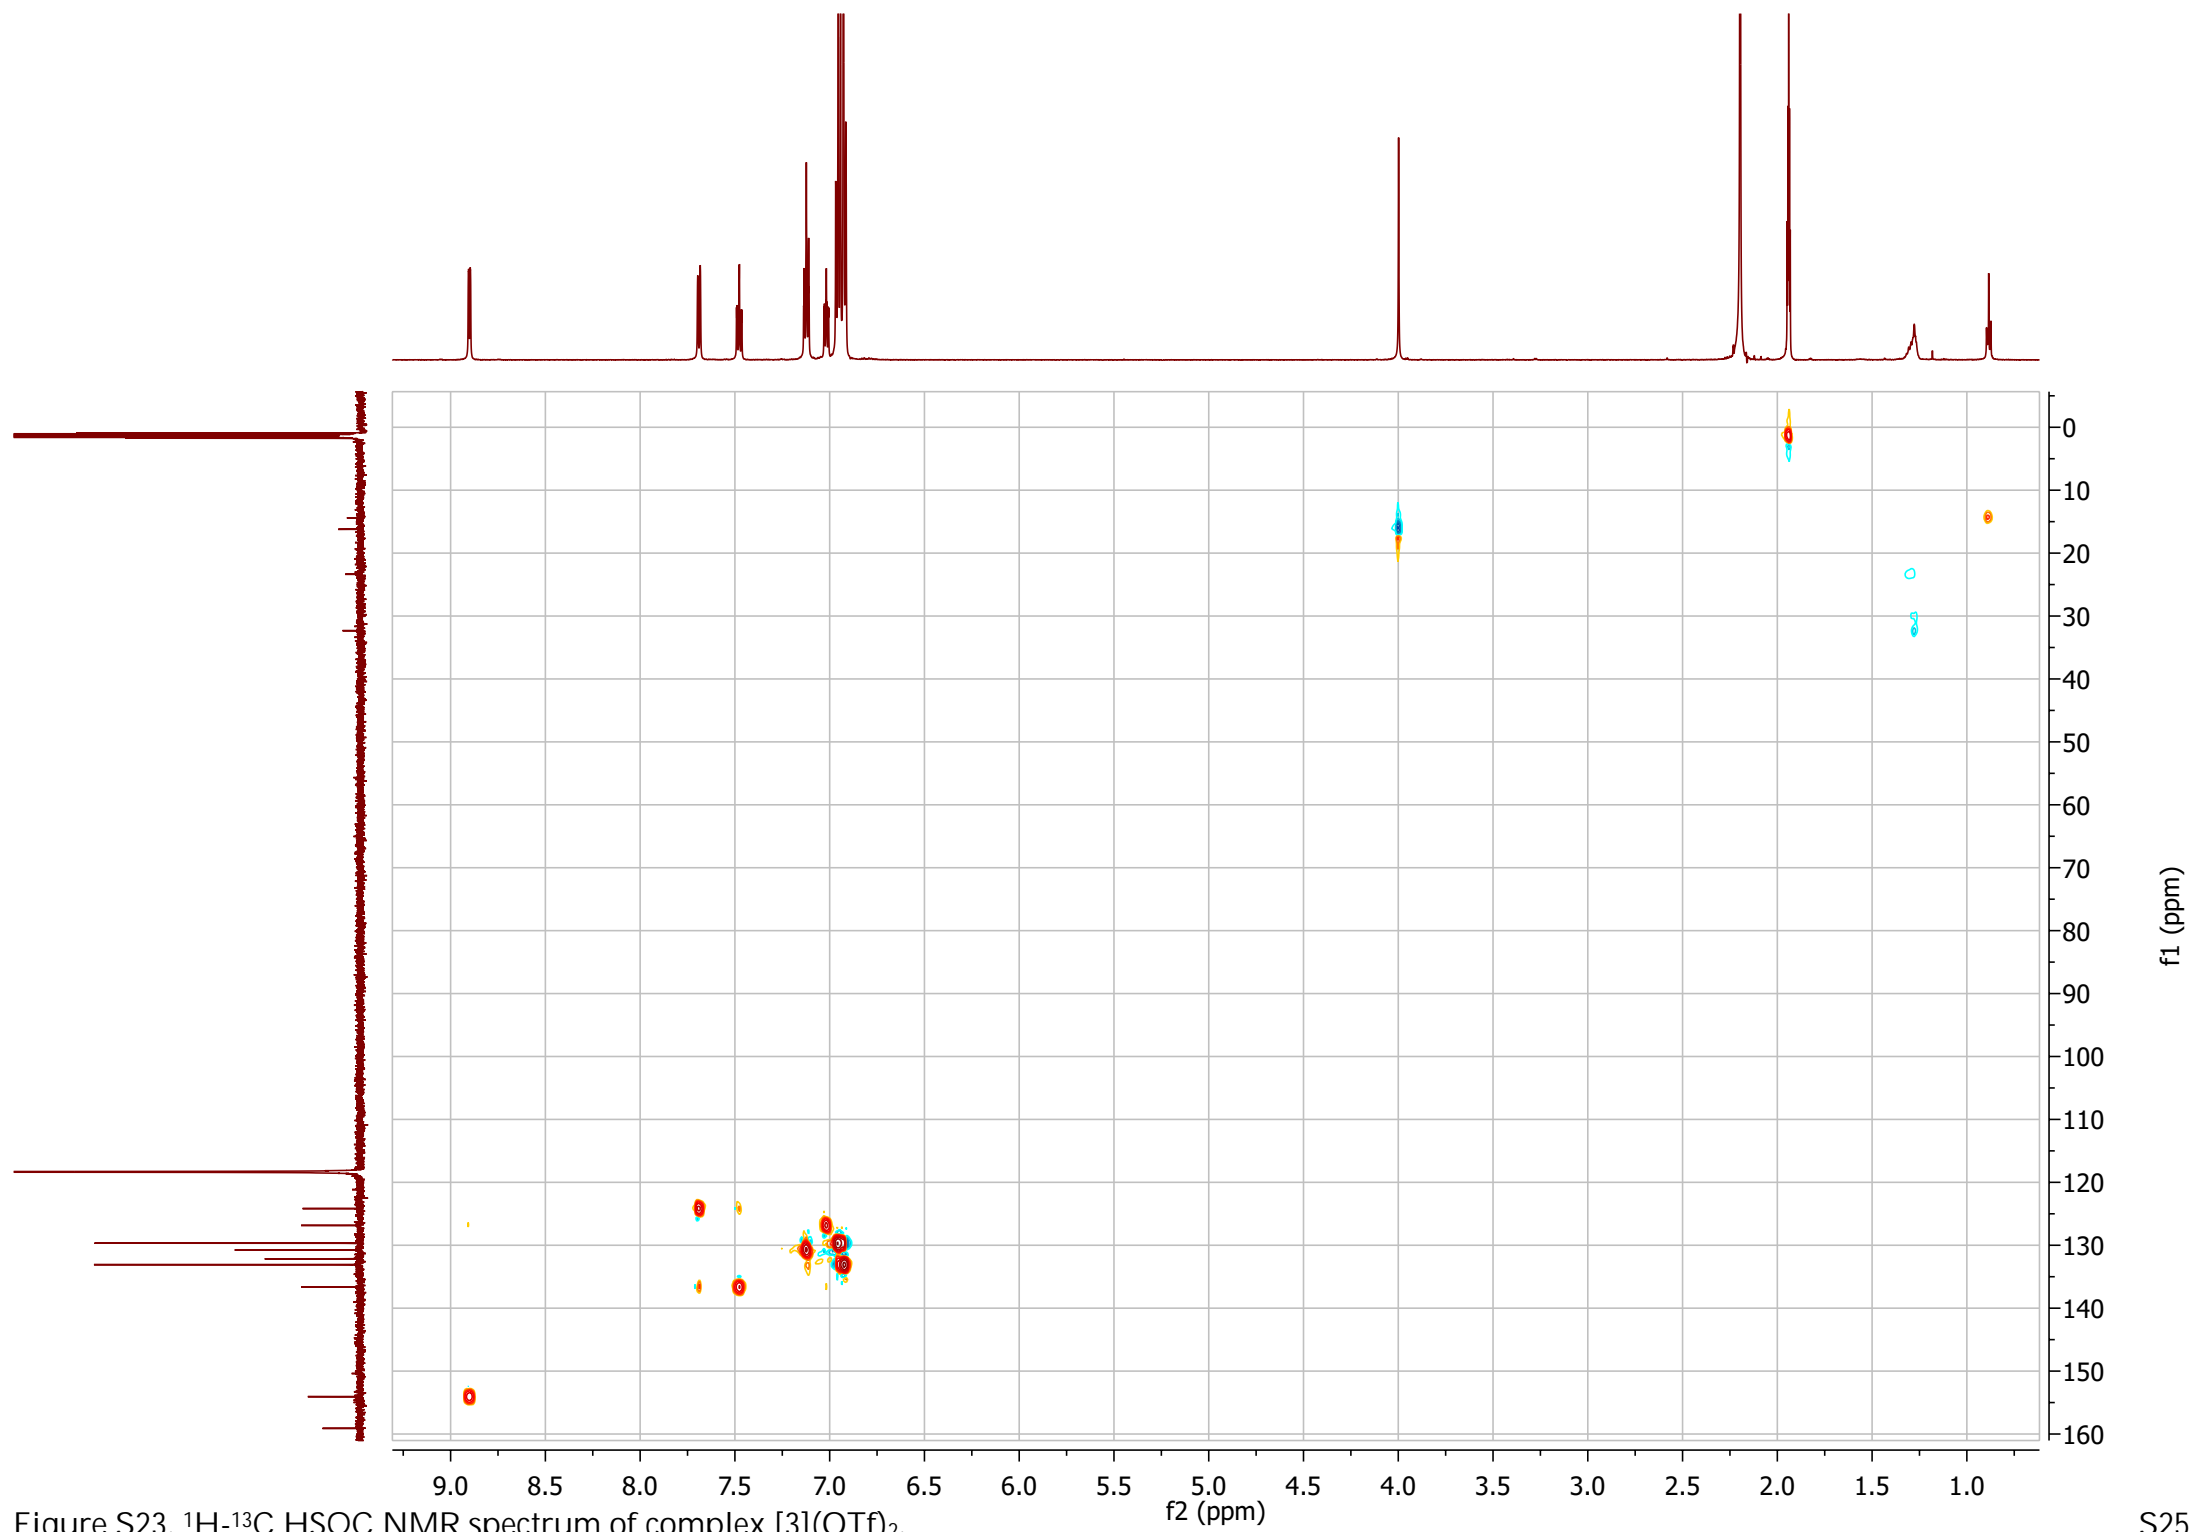

Figure S23.  $^1\text{H}$ - $^{13}\text{C}$  HSQC NMR spectrum of complex  $[3](\text{OTf})_2$ .

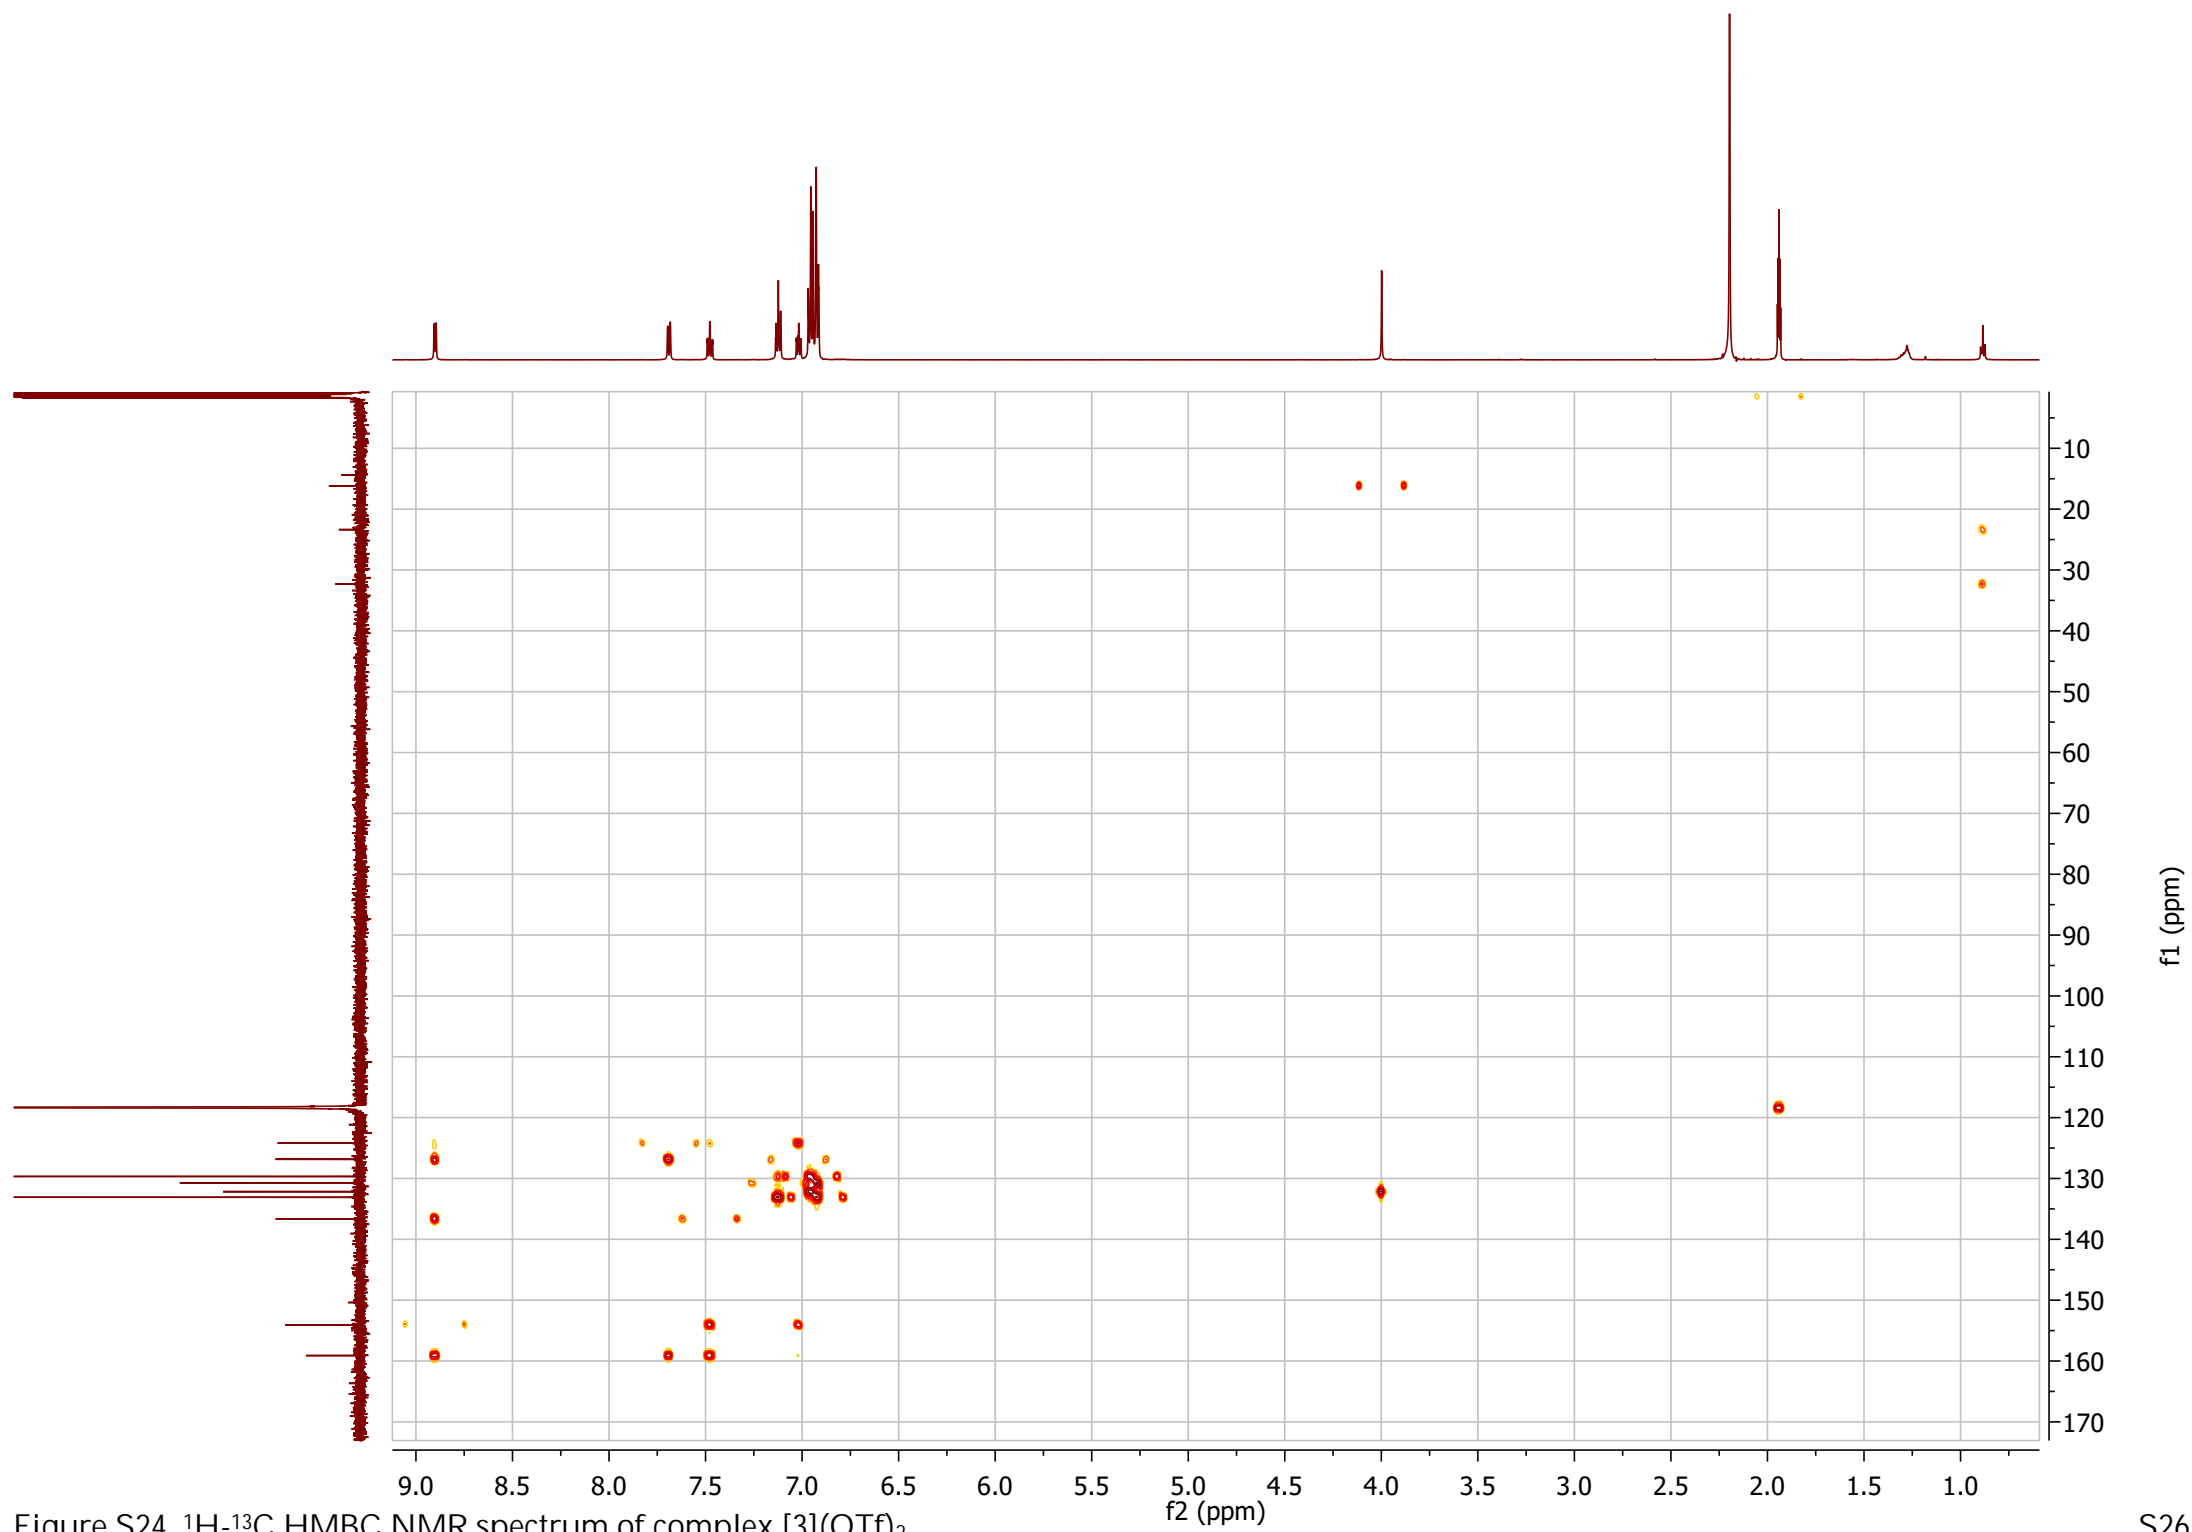







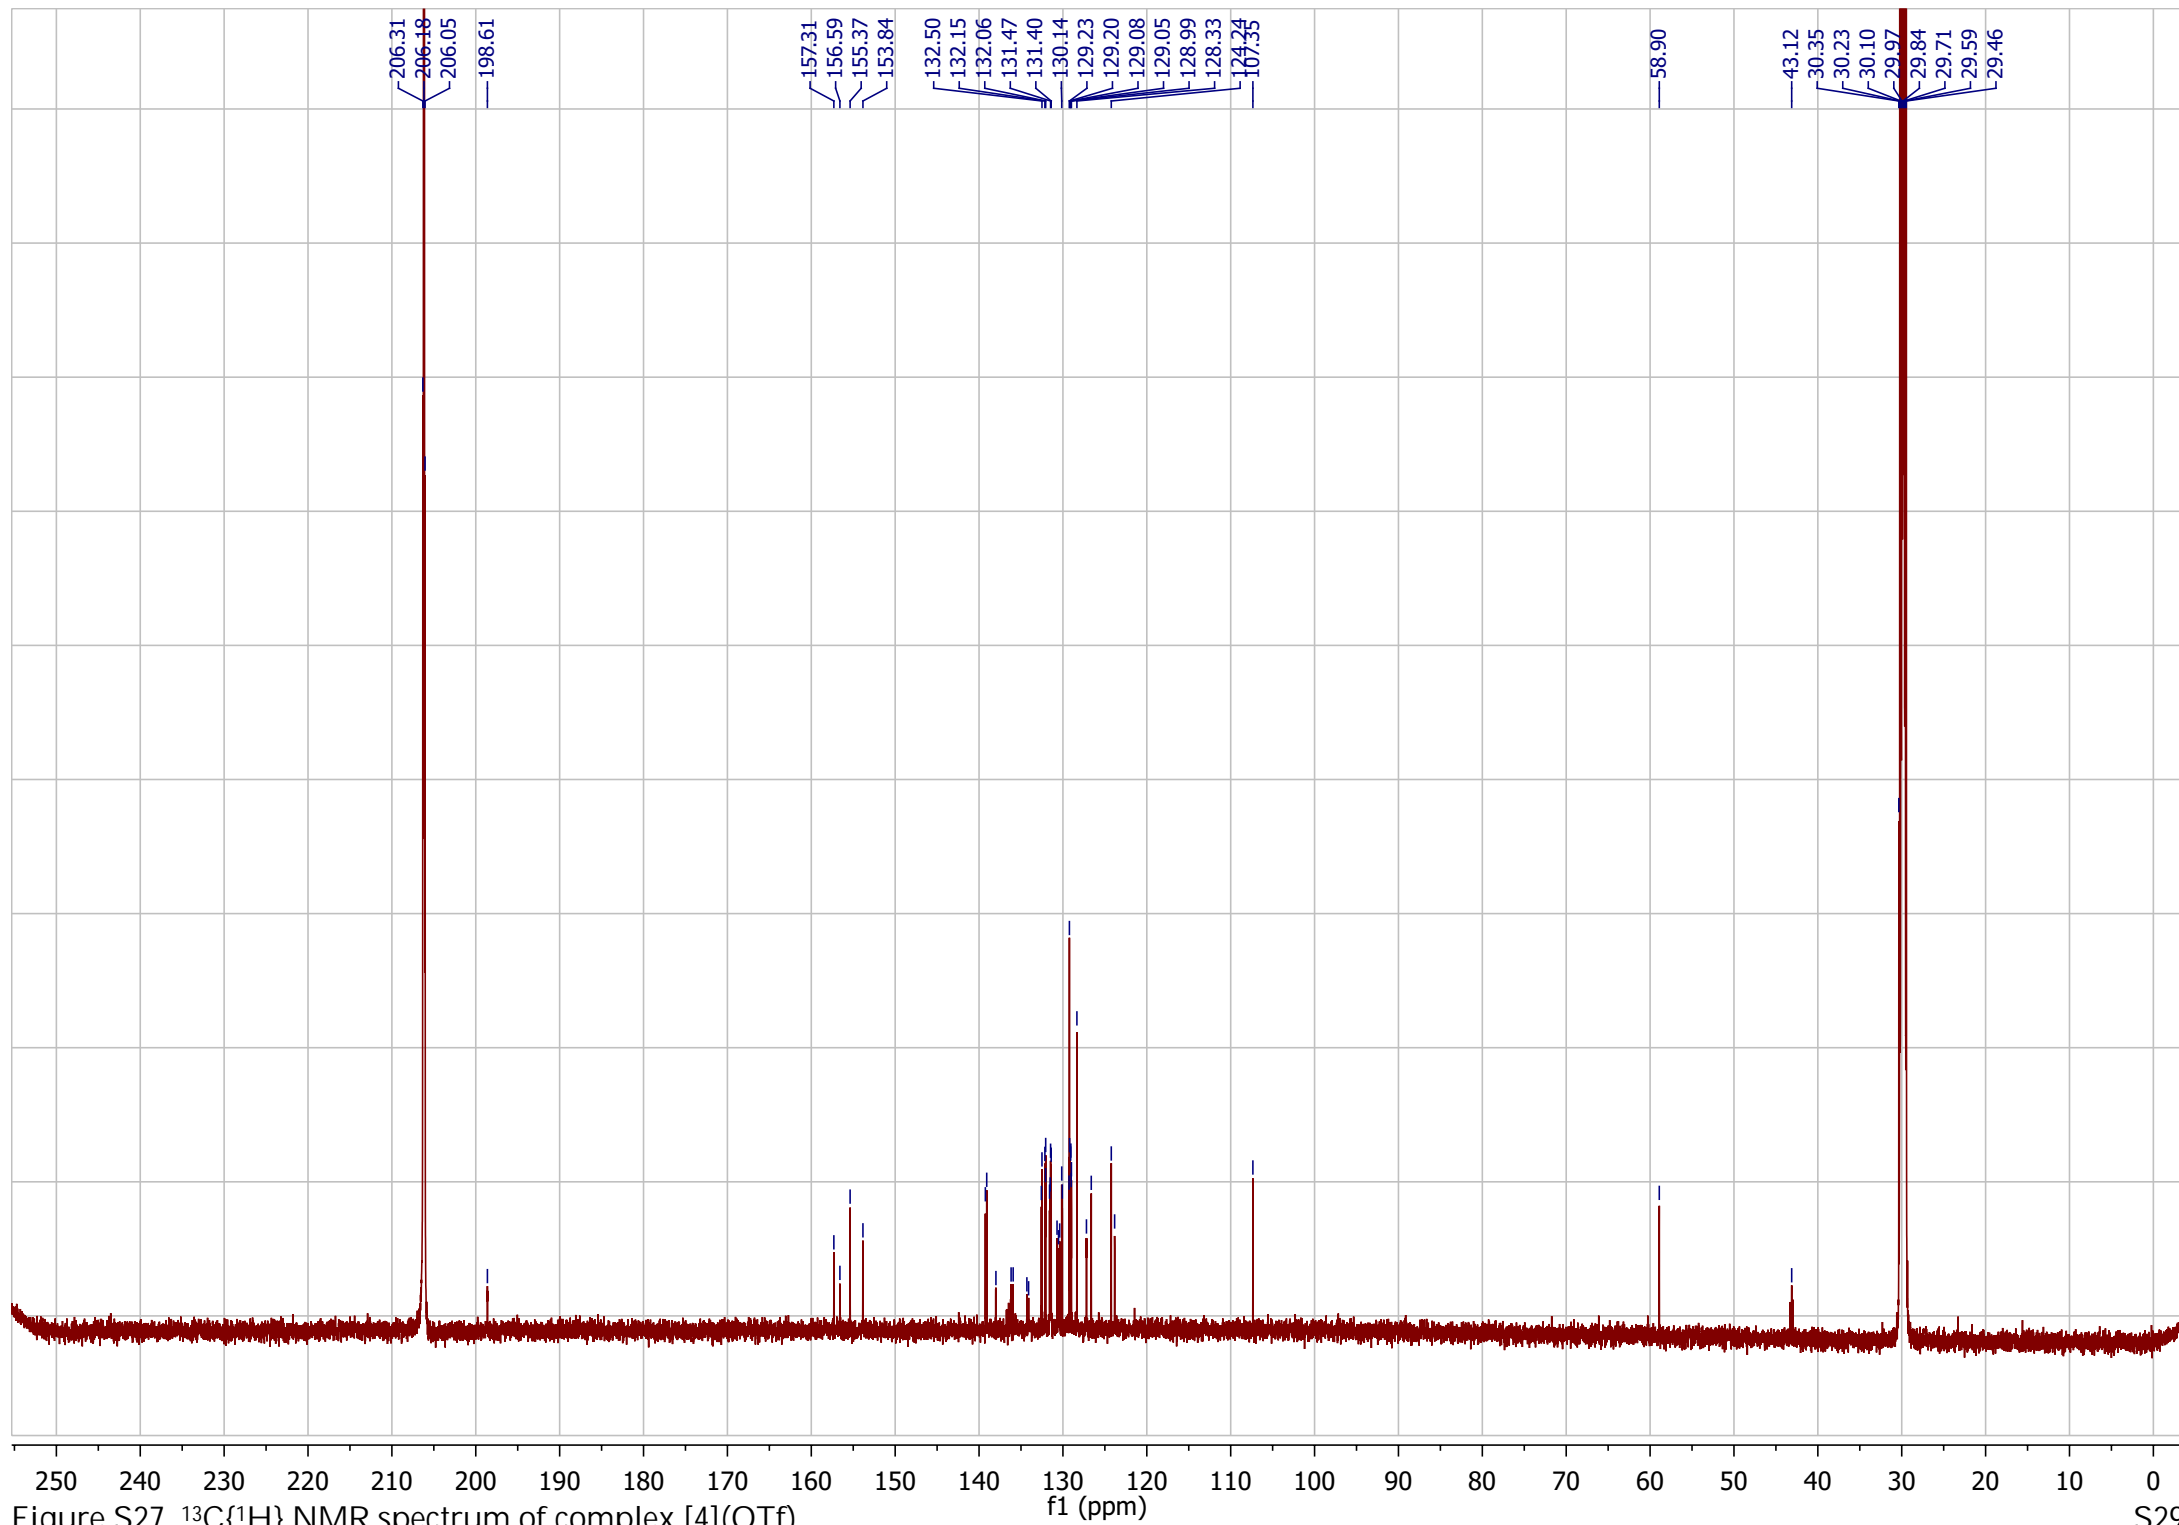

Figure S27.  $^{13}\text{C}\{^1\text{H}\}$  NMR spectrum of complex [4](OTf).

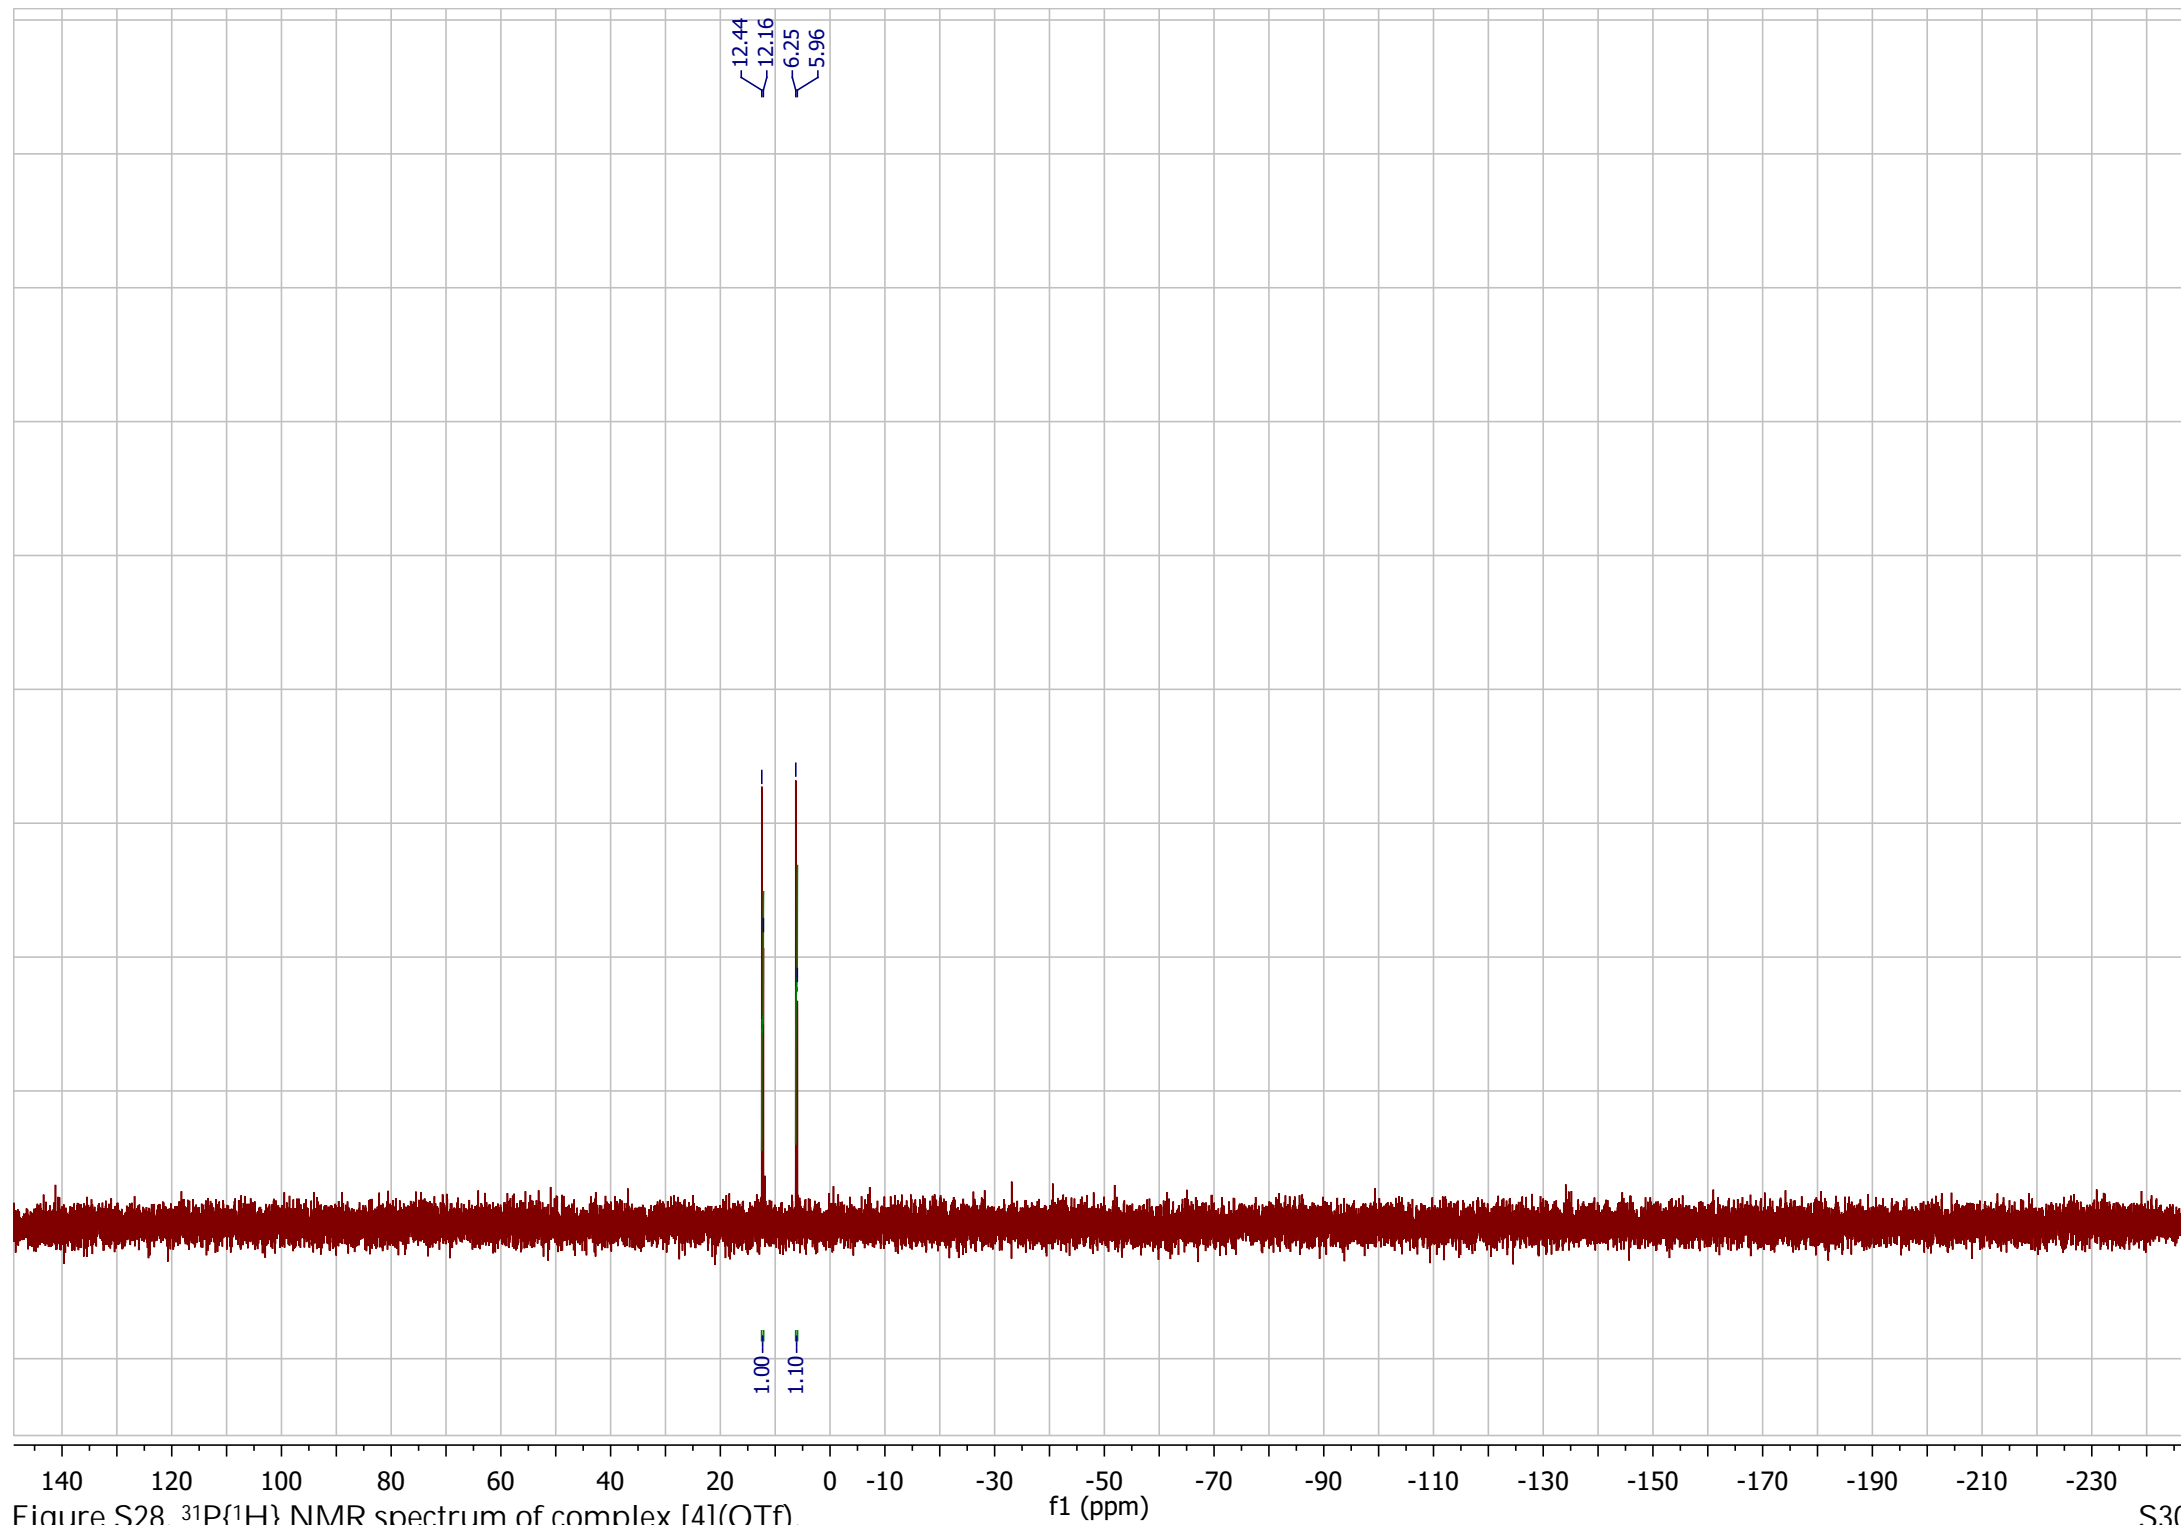

Figure S28.  $^{31}\text{P}\{^1\text{H}\}$  NMR spectrum of complex [4](OTf).

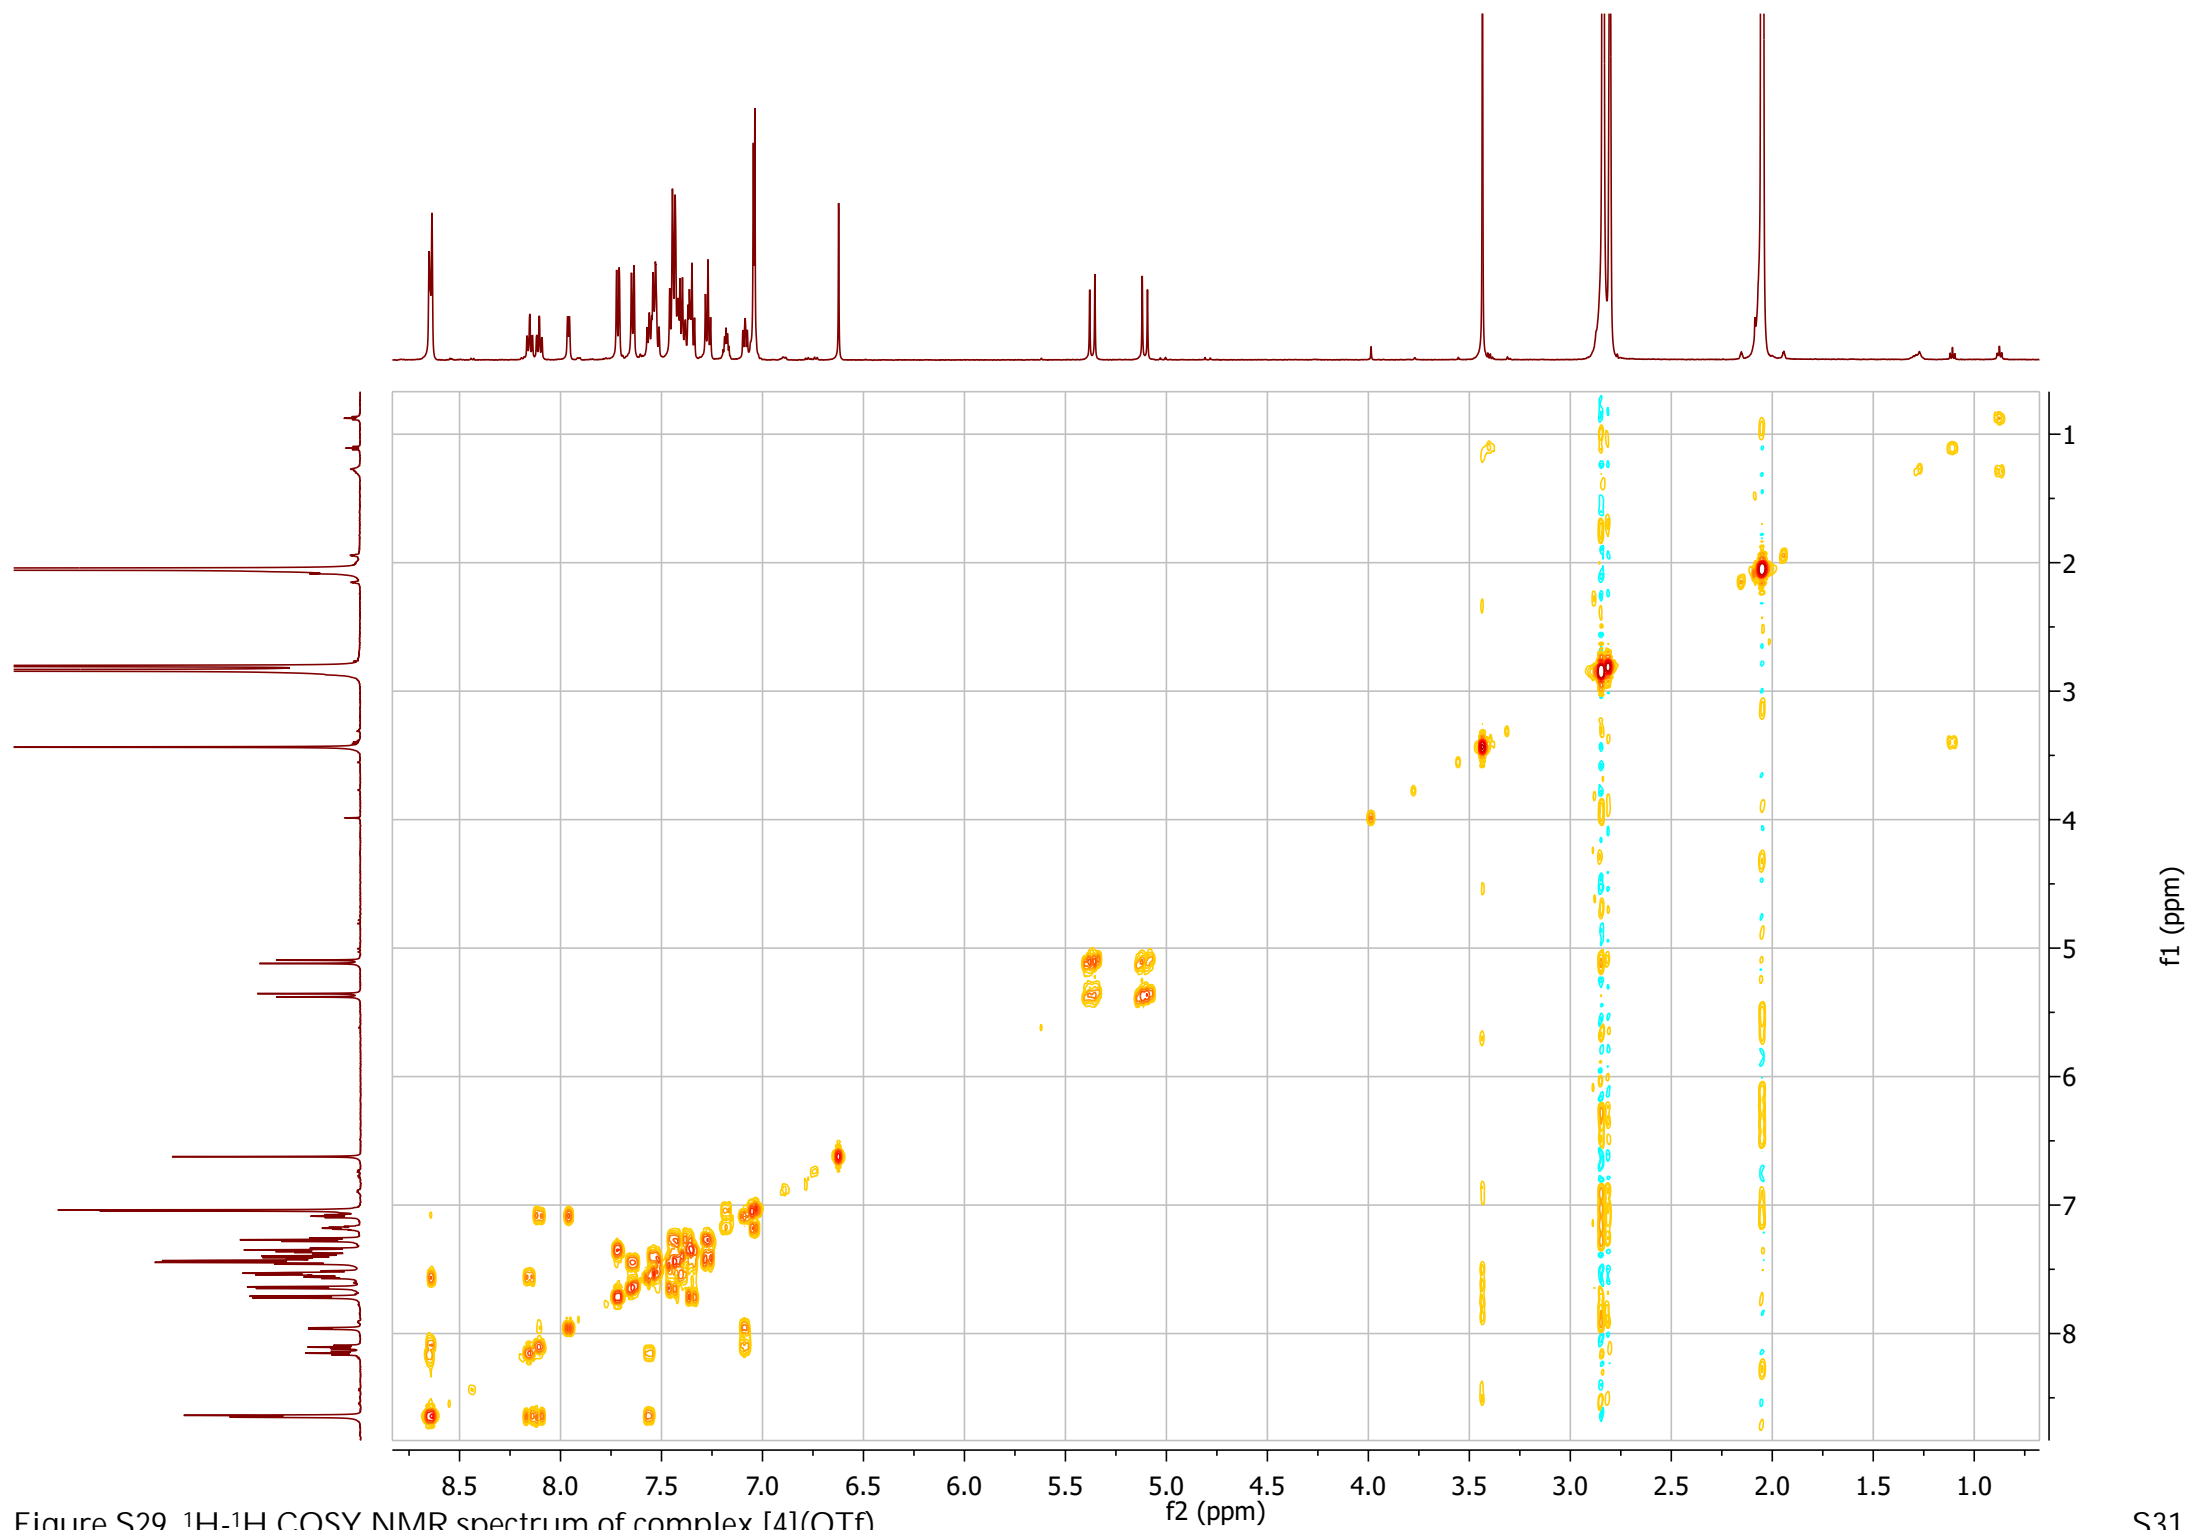

Figure S29.  $^1\text{H}$ - $^1\text{H}$  COSY NMR spectrum of complex  $[4](\text{OTf})$ .

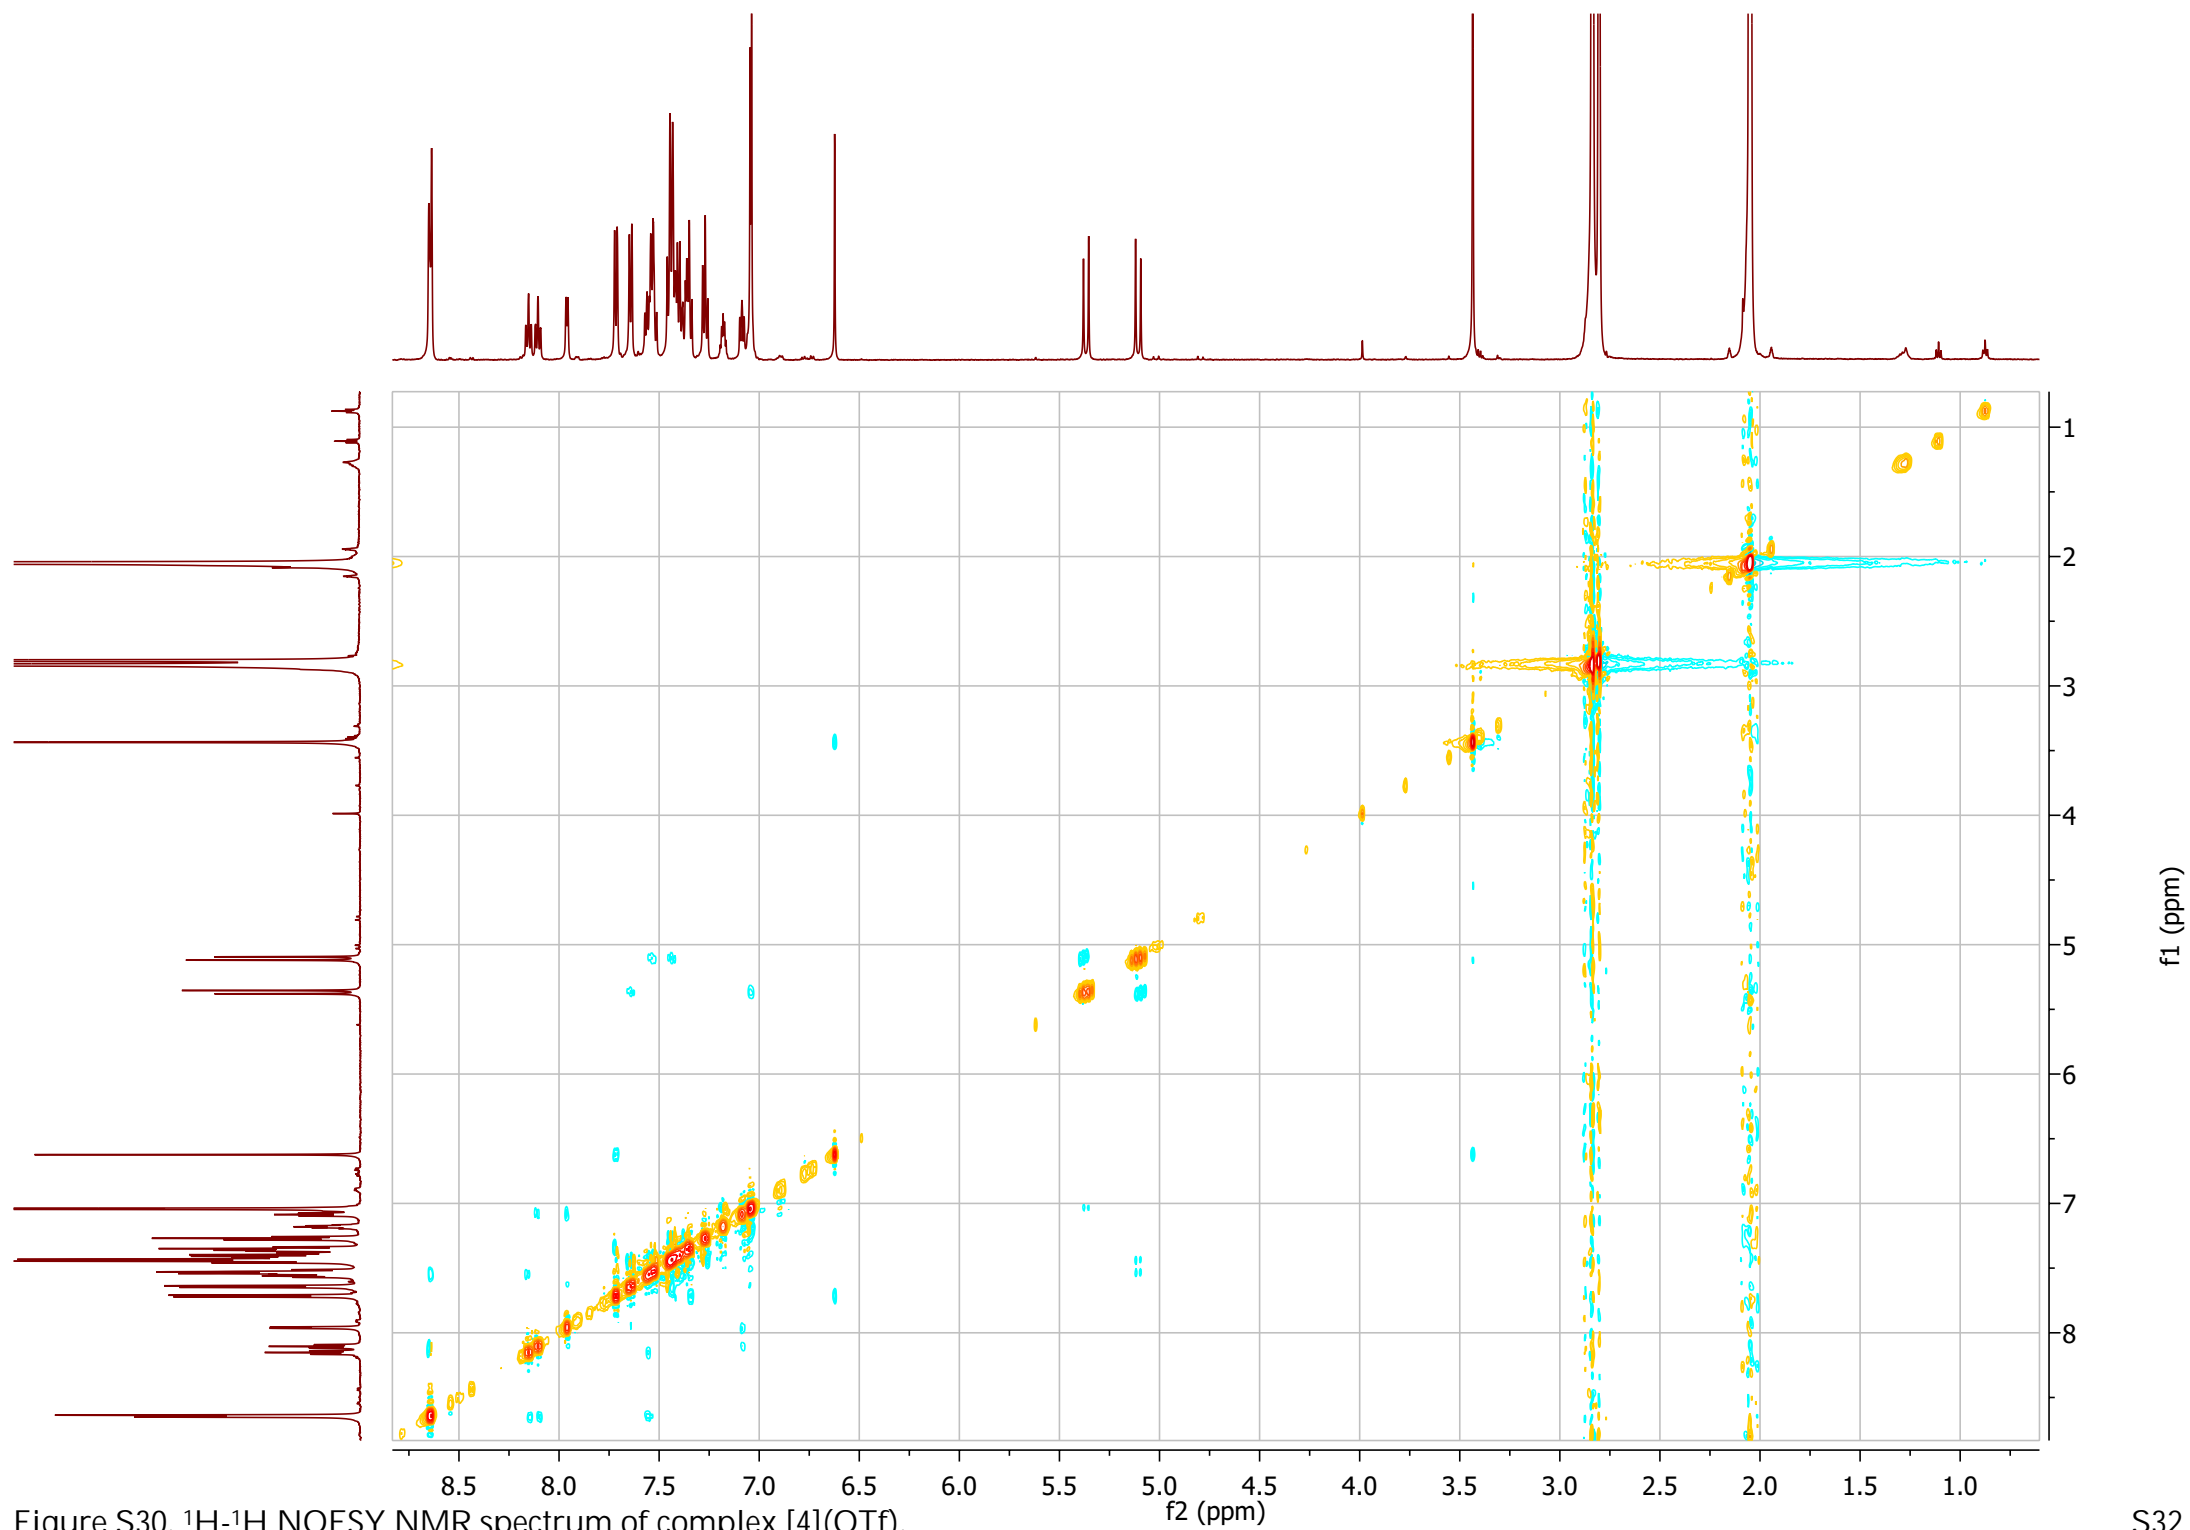

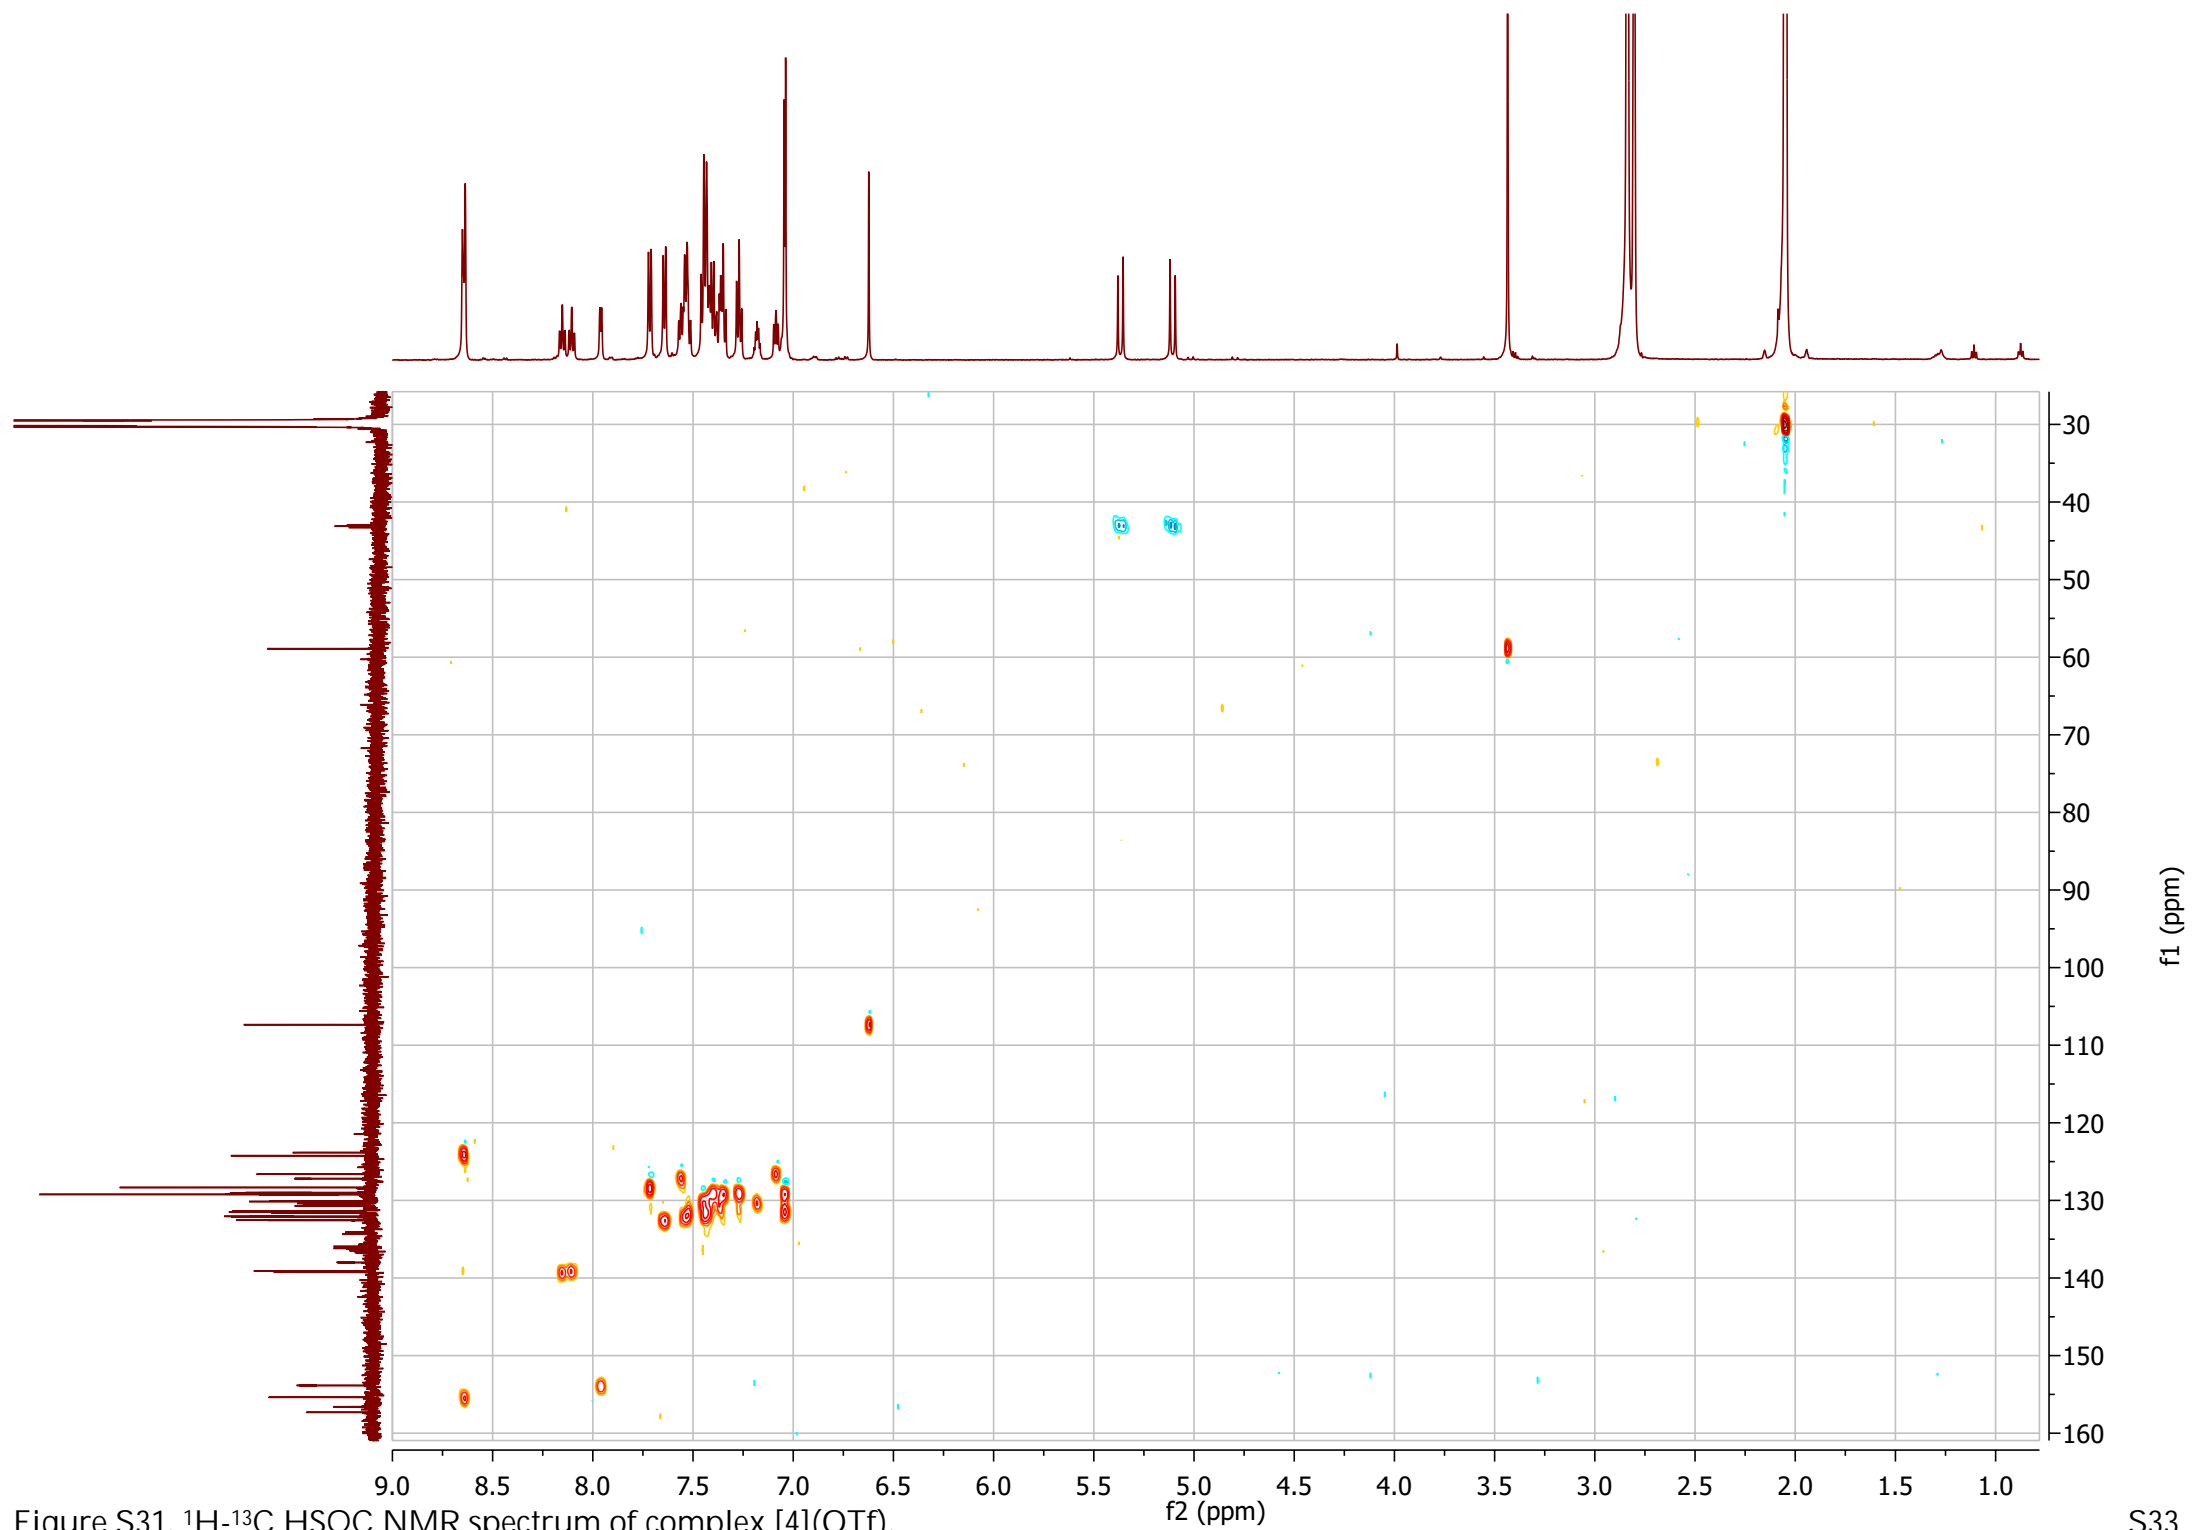

Figure S31.  $^1\text{H}$ - $^{13}\text{C}$  HSQC NMR spectrum of complex [4](OTf).

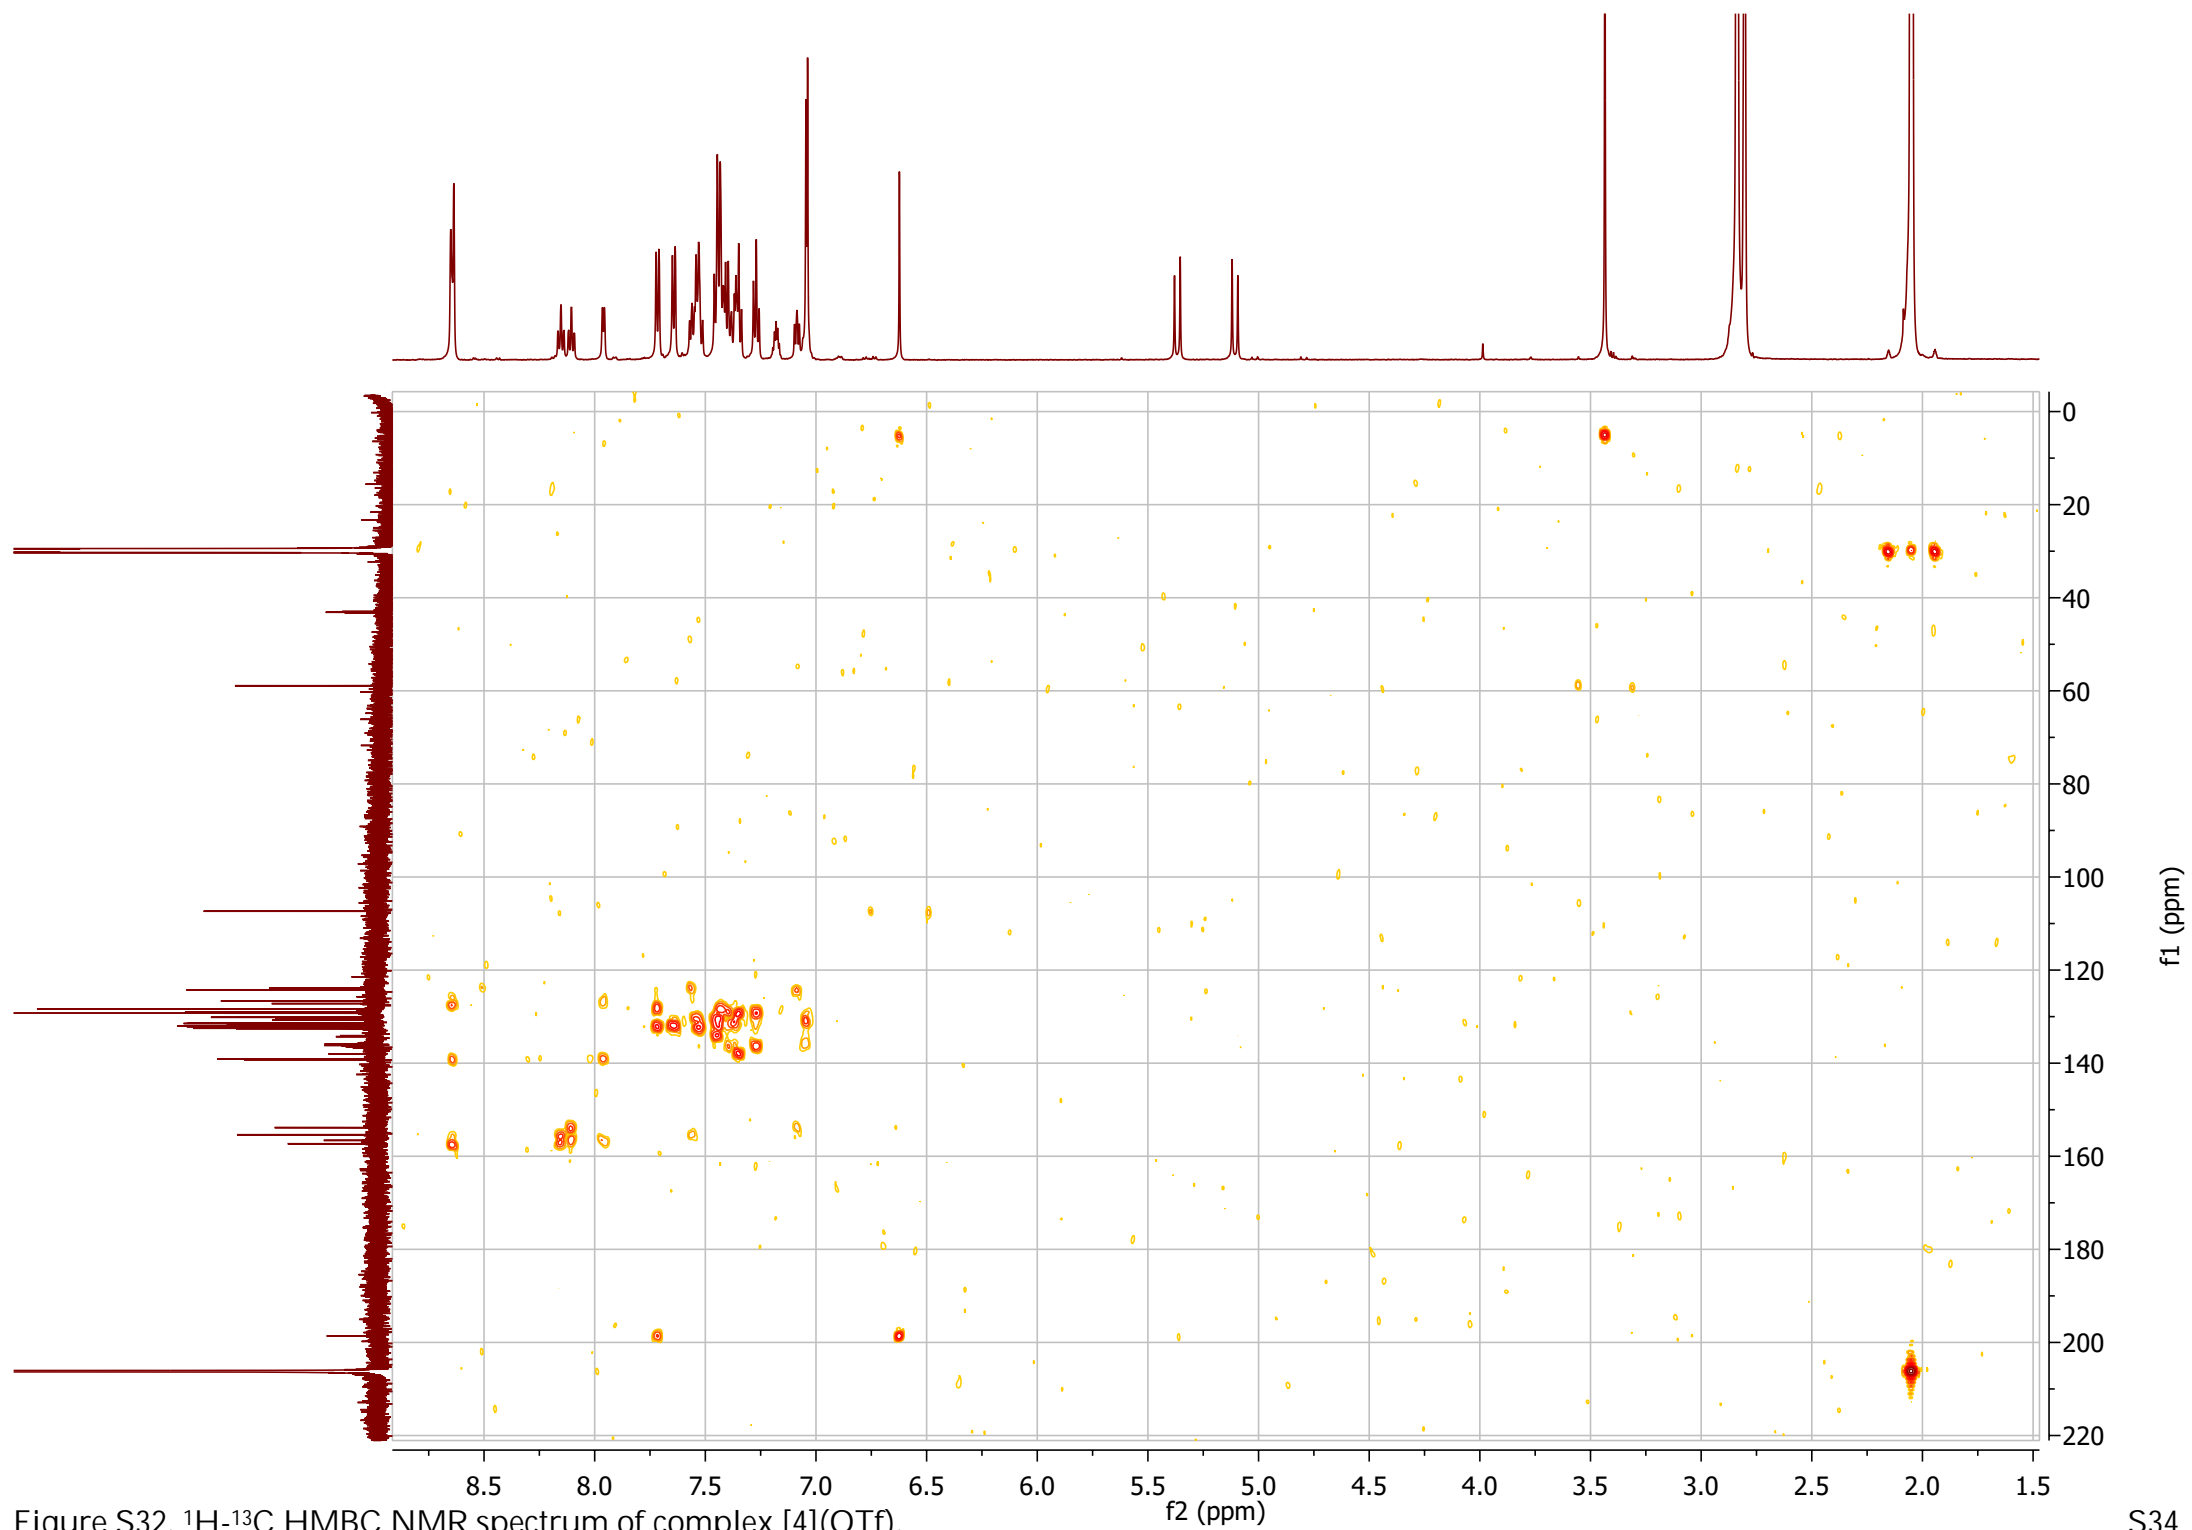

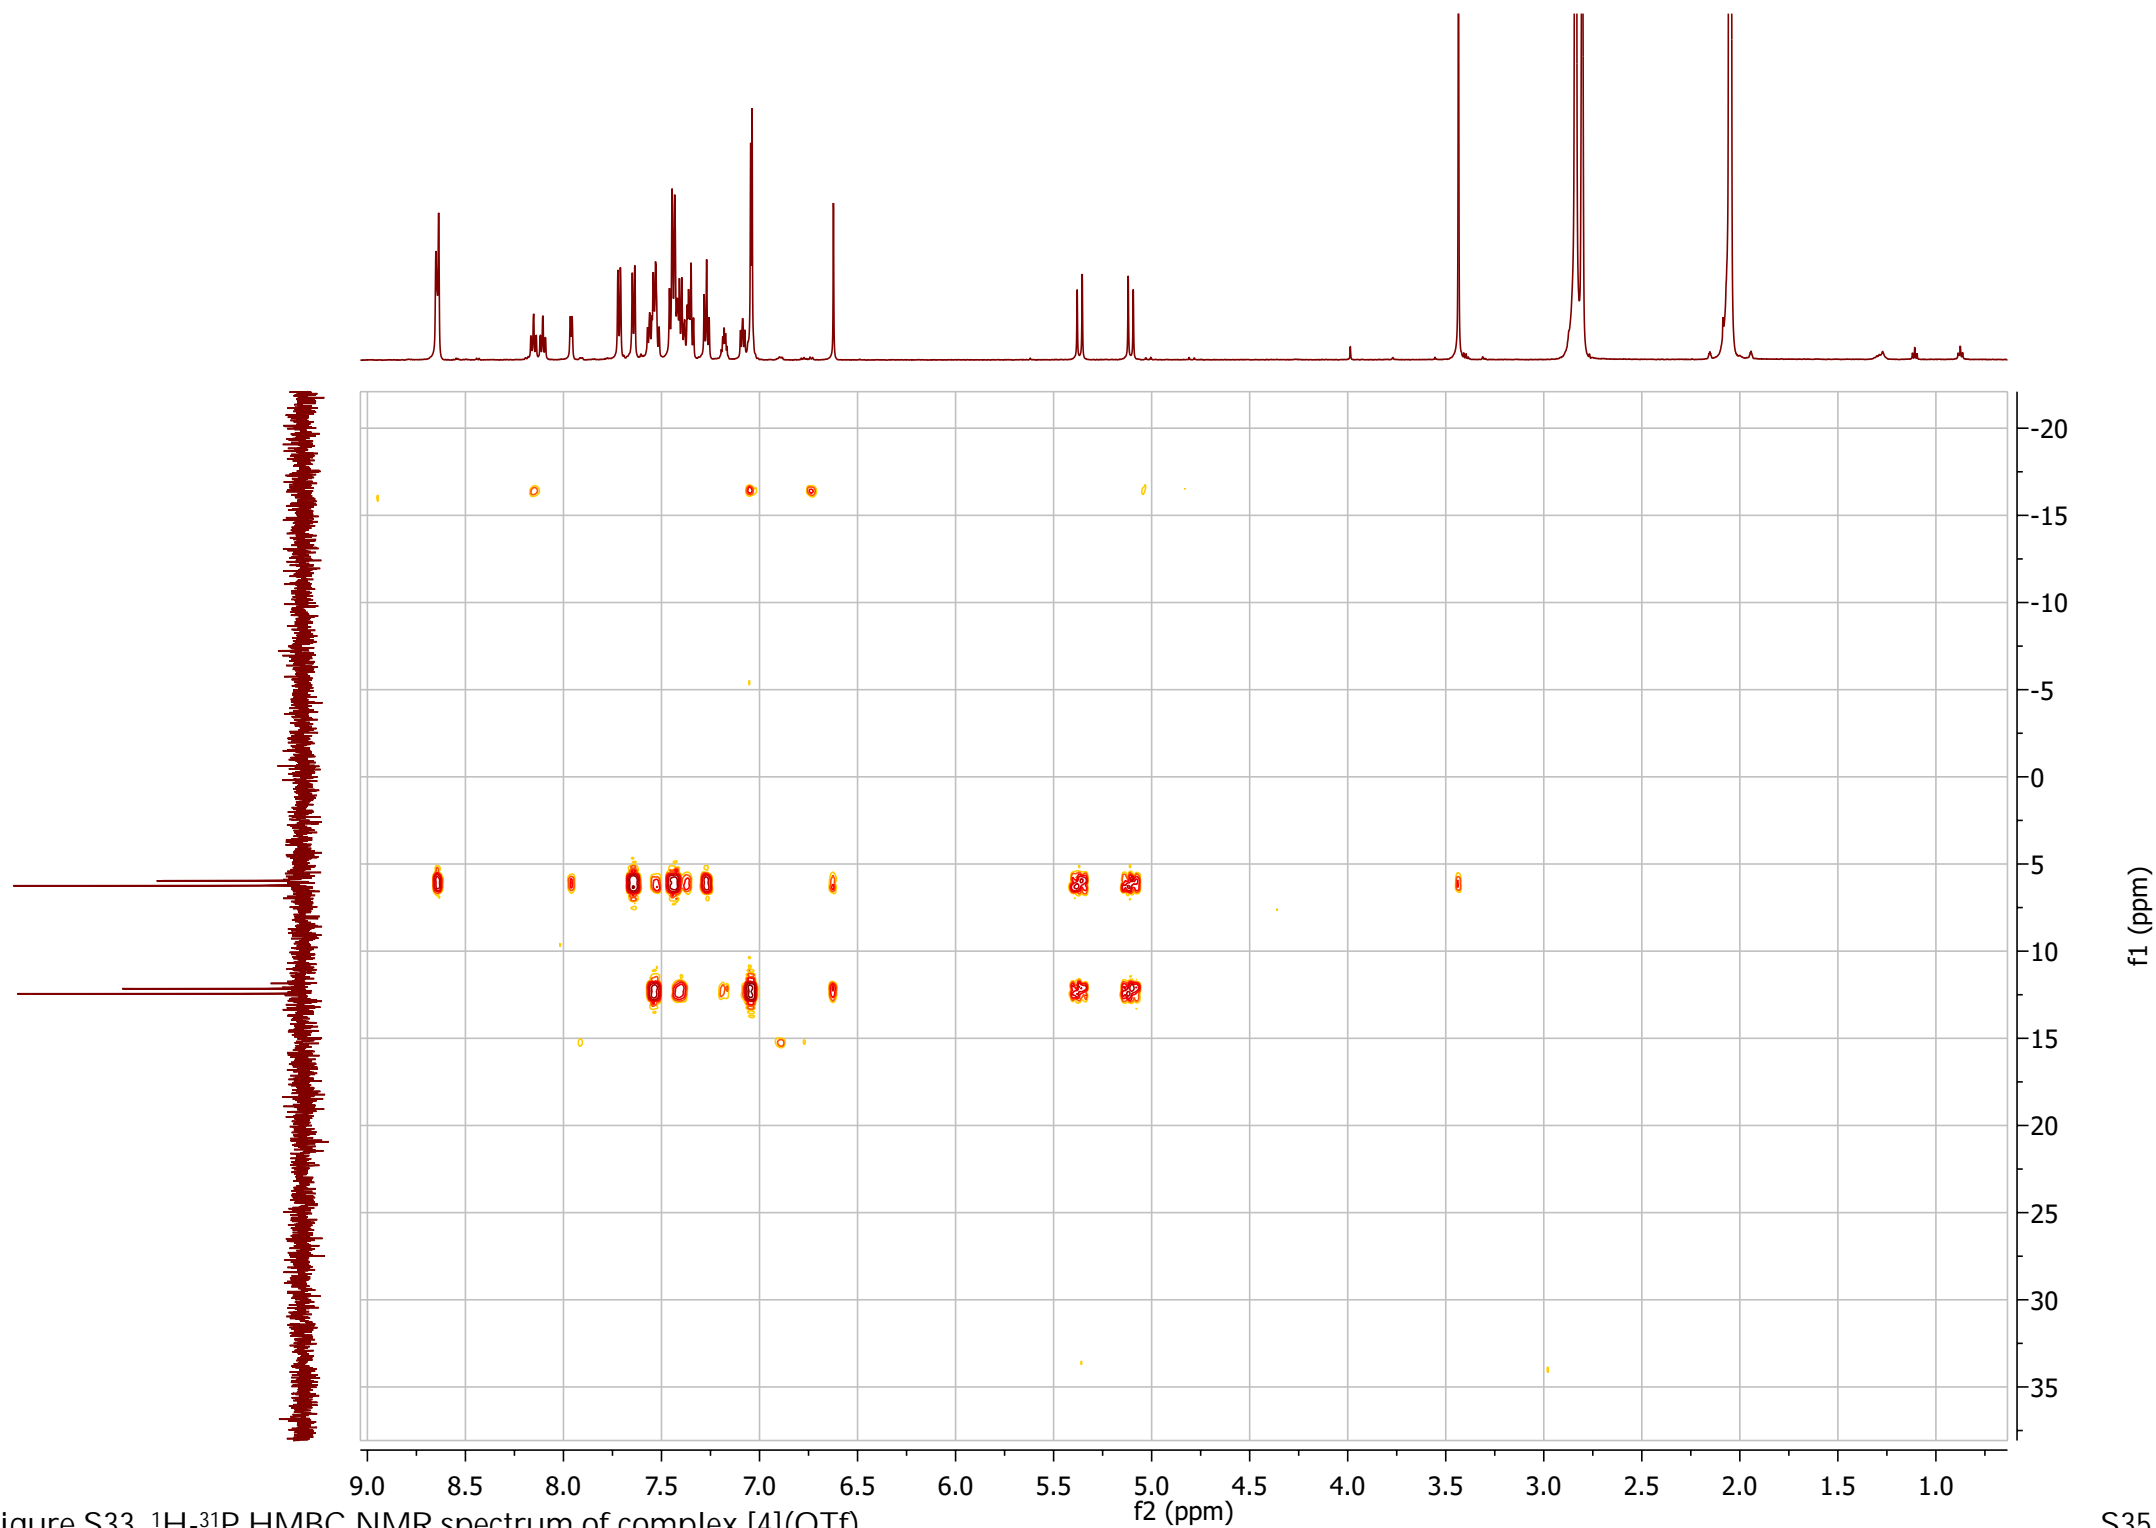

Figure S33.  $^1\text{H}$ - $^{31}\text{P}$  HMBC NMR spectrum of complex  $[4](\text{OTf})$ .





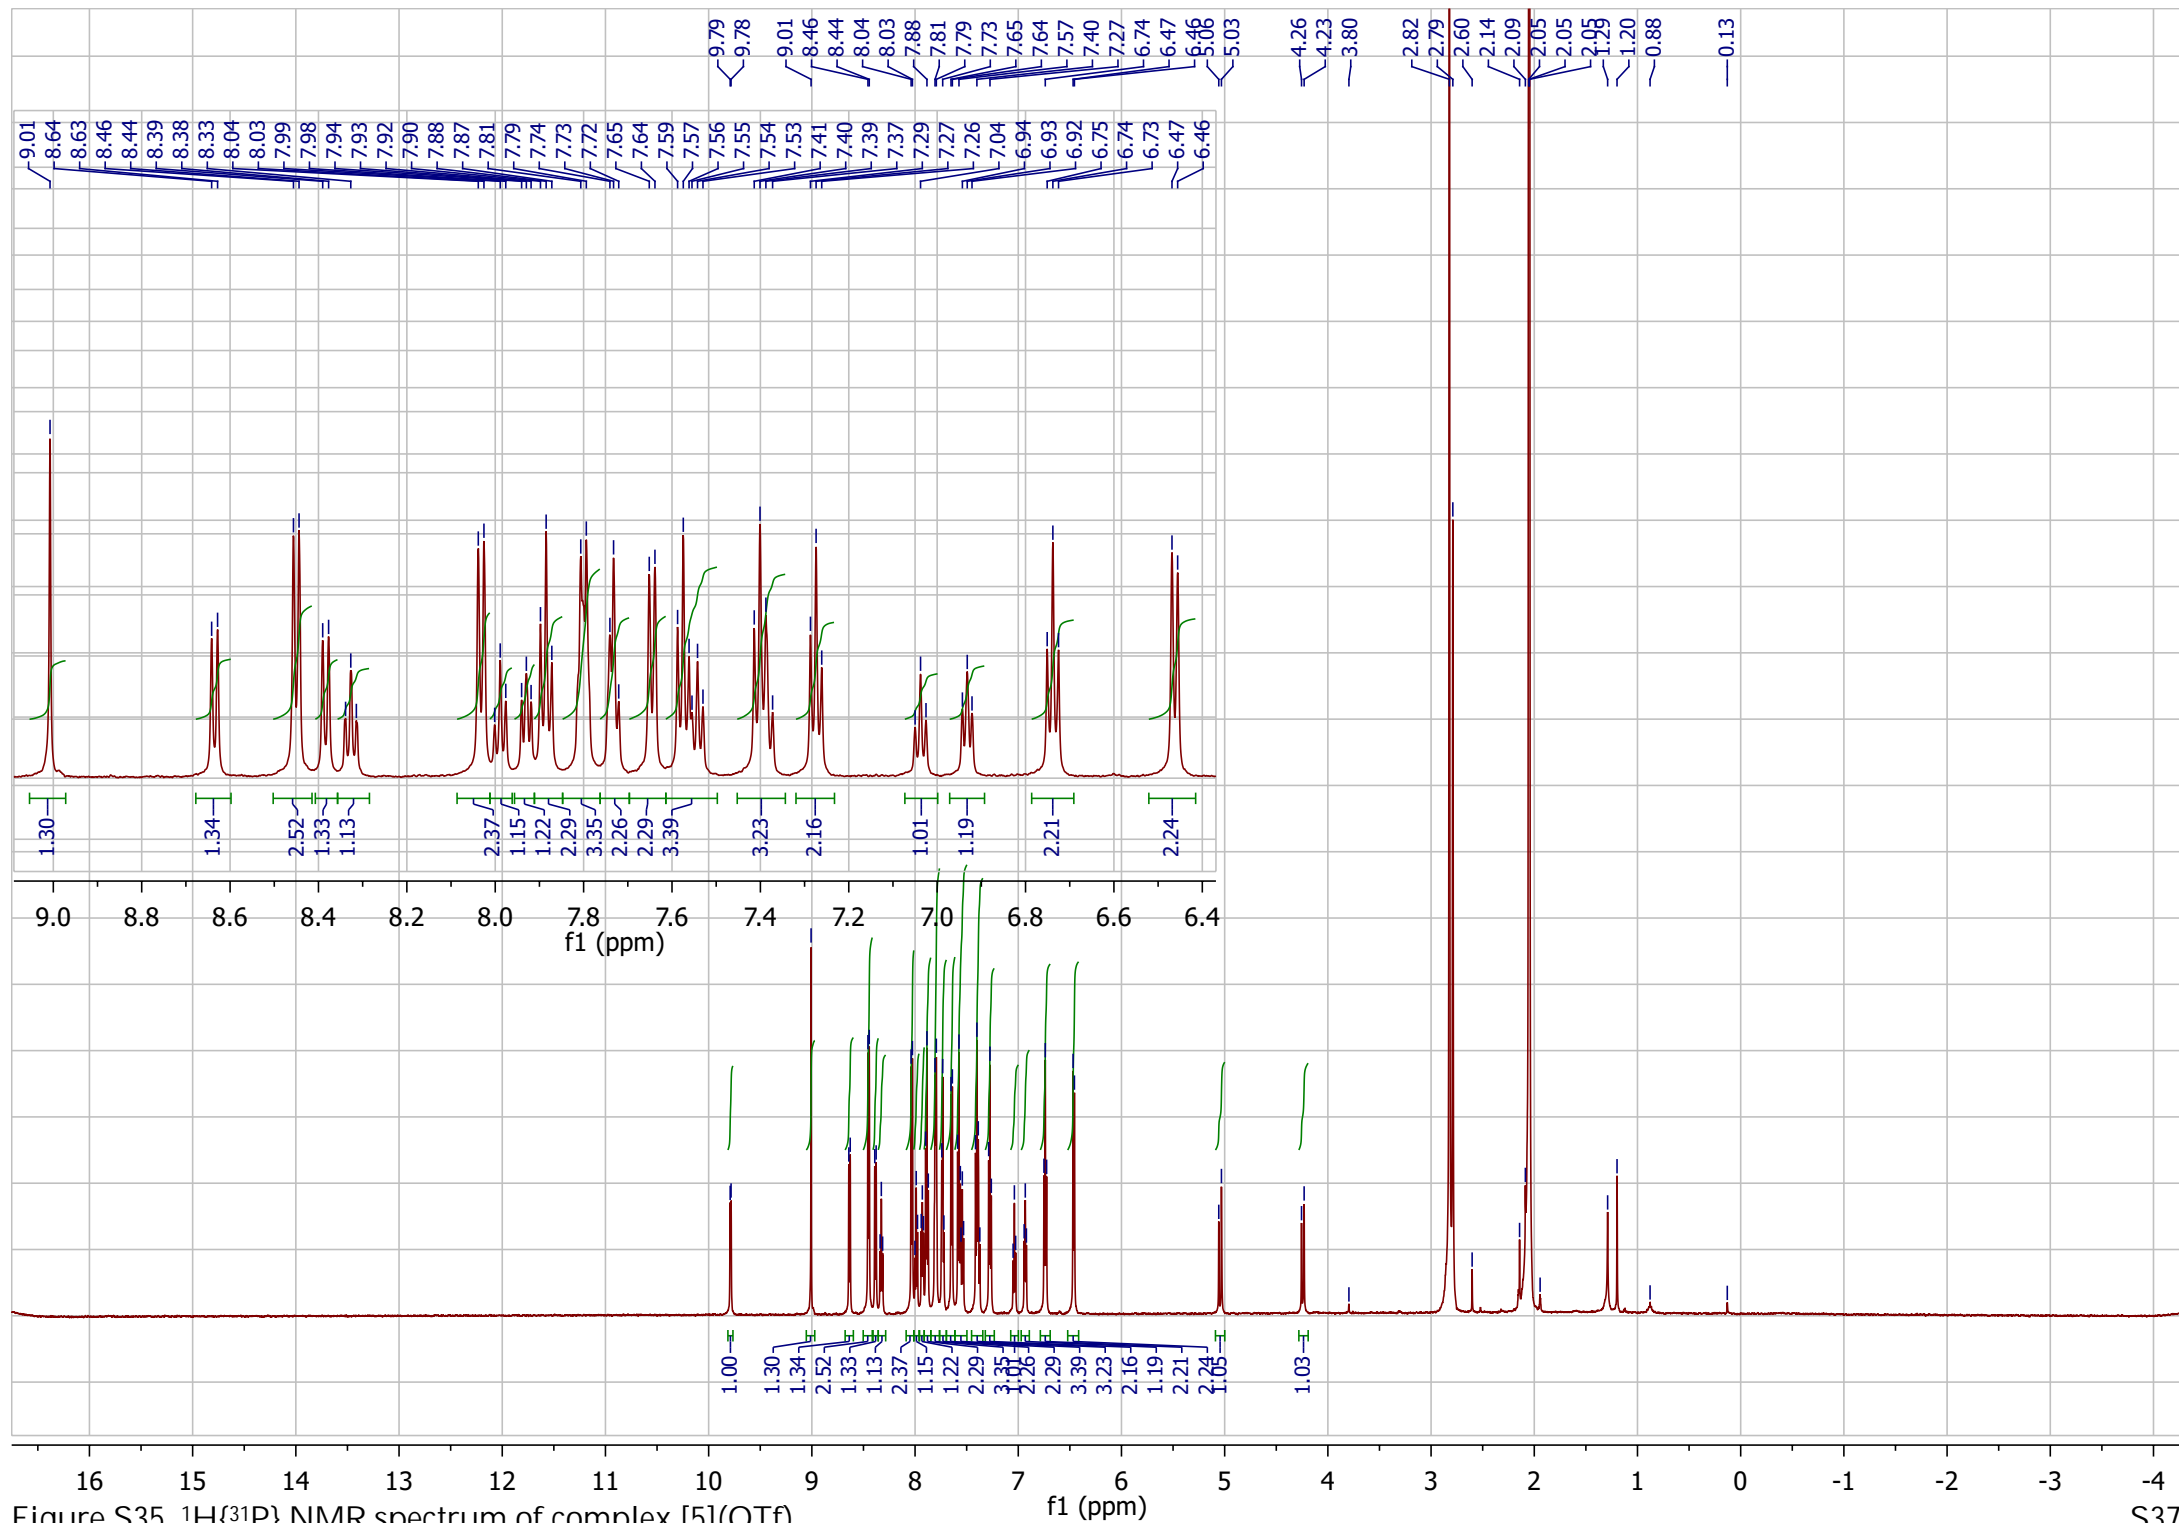

Figure S35.  $^1\text{H}\{^{31}\text{P}\}$  NMR spectrum of complex [5](OTf).

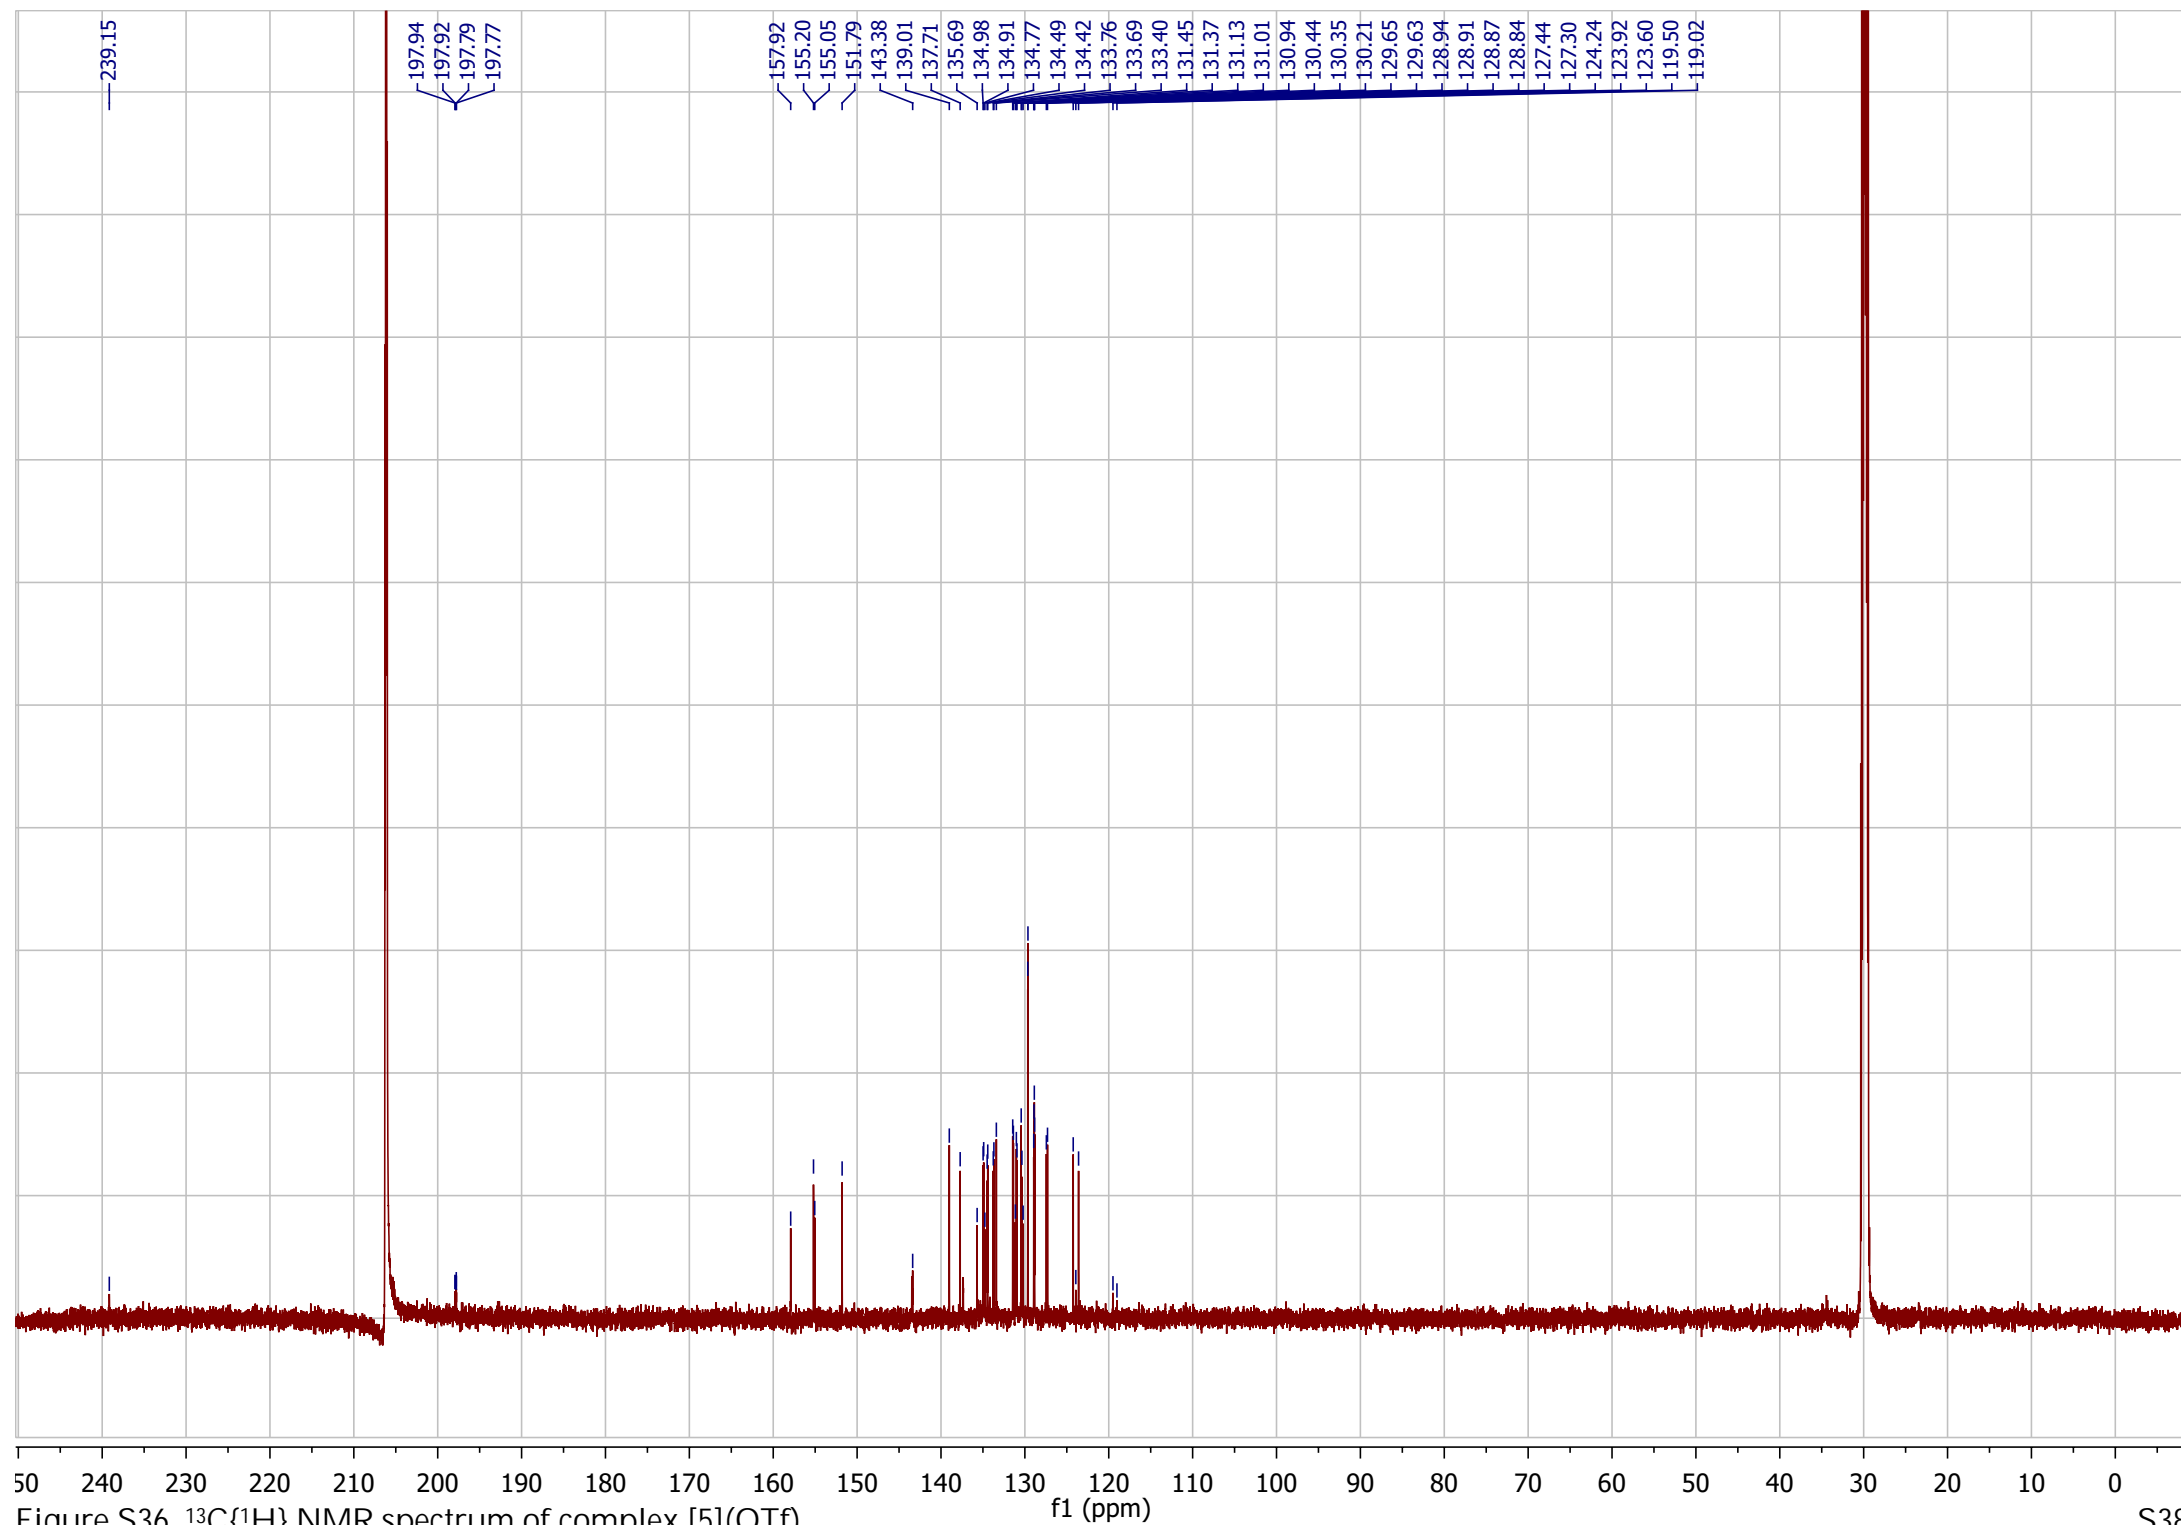

Figure S36.  $^{13}\text{C}\{^1\text{H}\}$  NMR spectrum of complex [5](OTf).

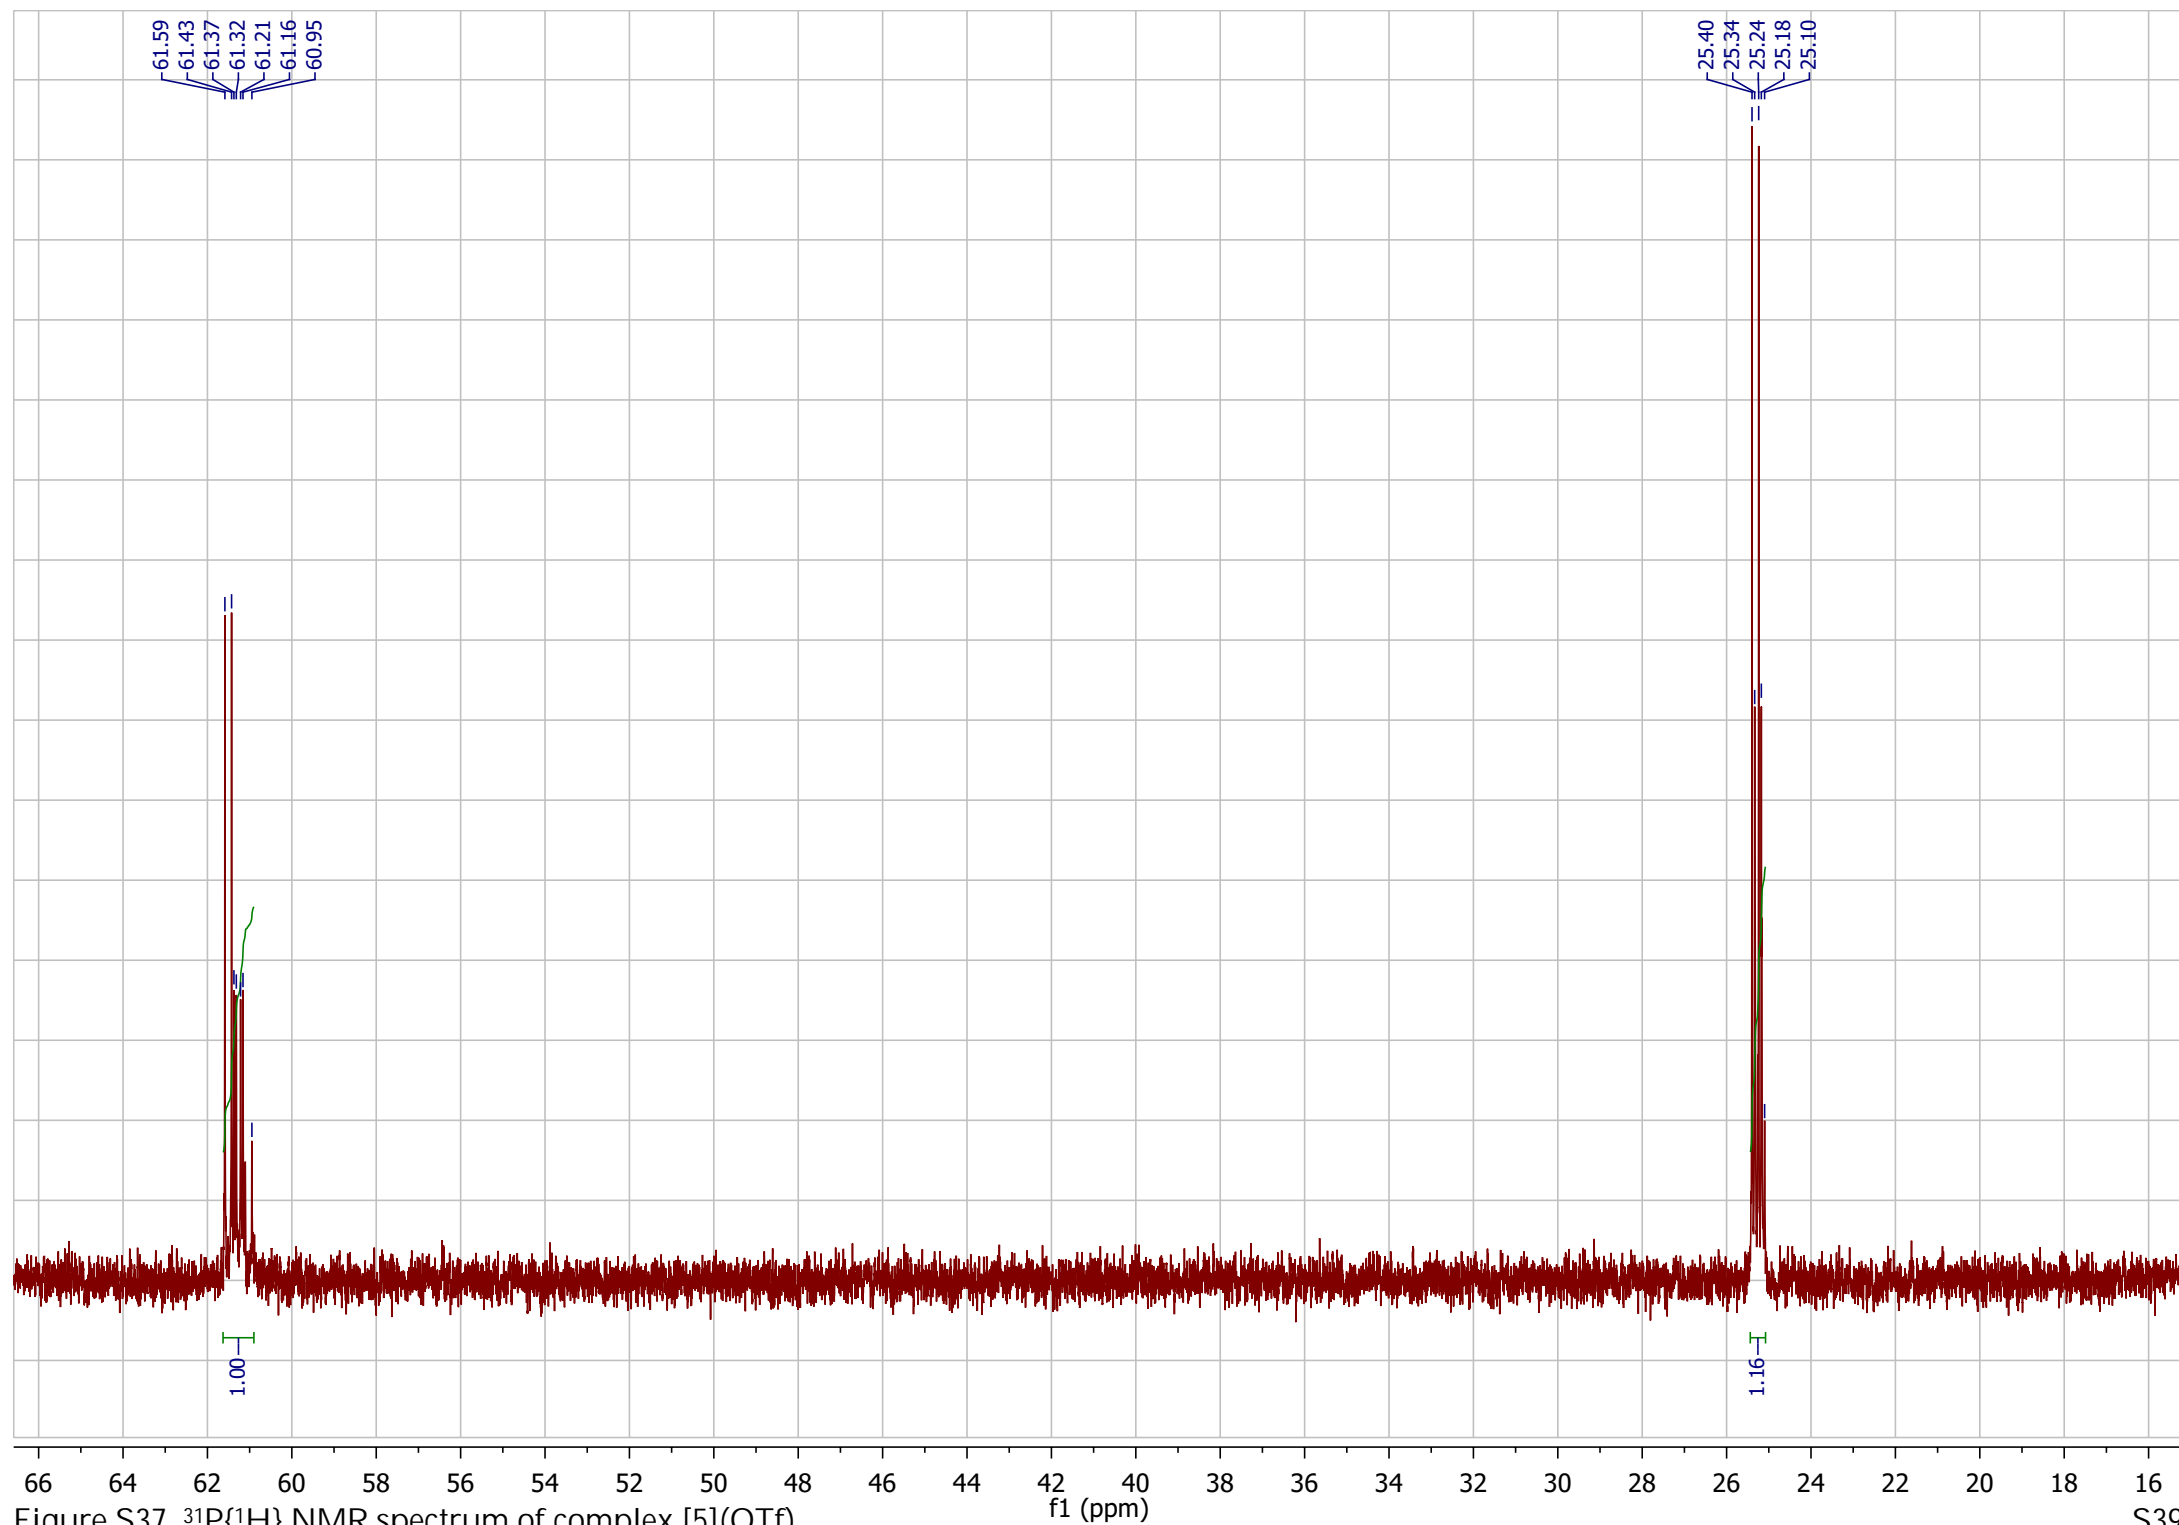

Figure S37.  $^{31}\text{P}\{^1\text{H}\}$  NMR spectrum of complex [5](OTf).

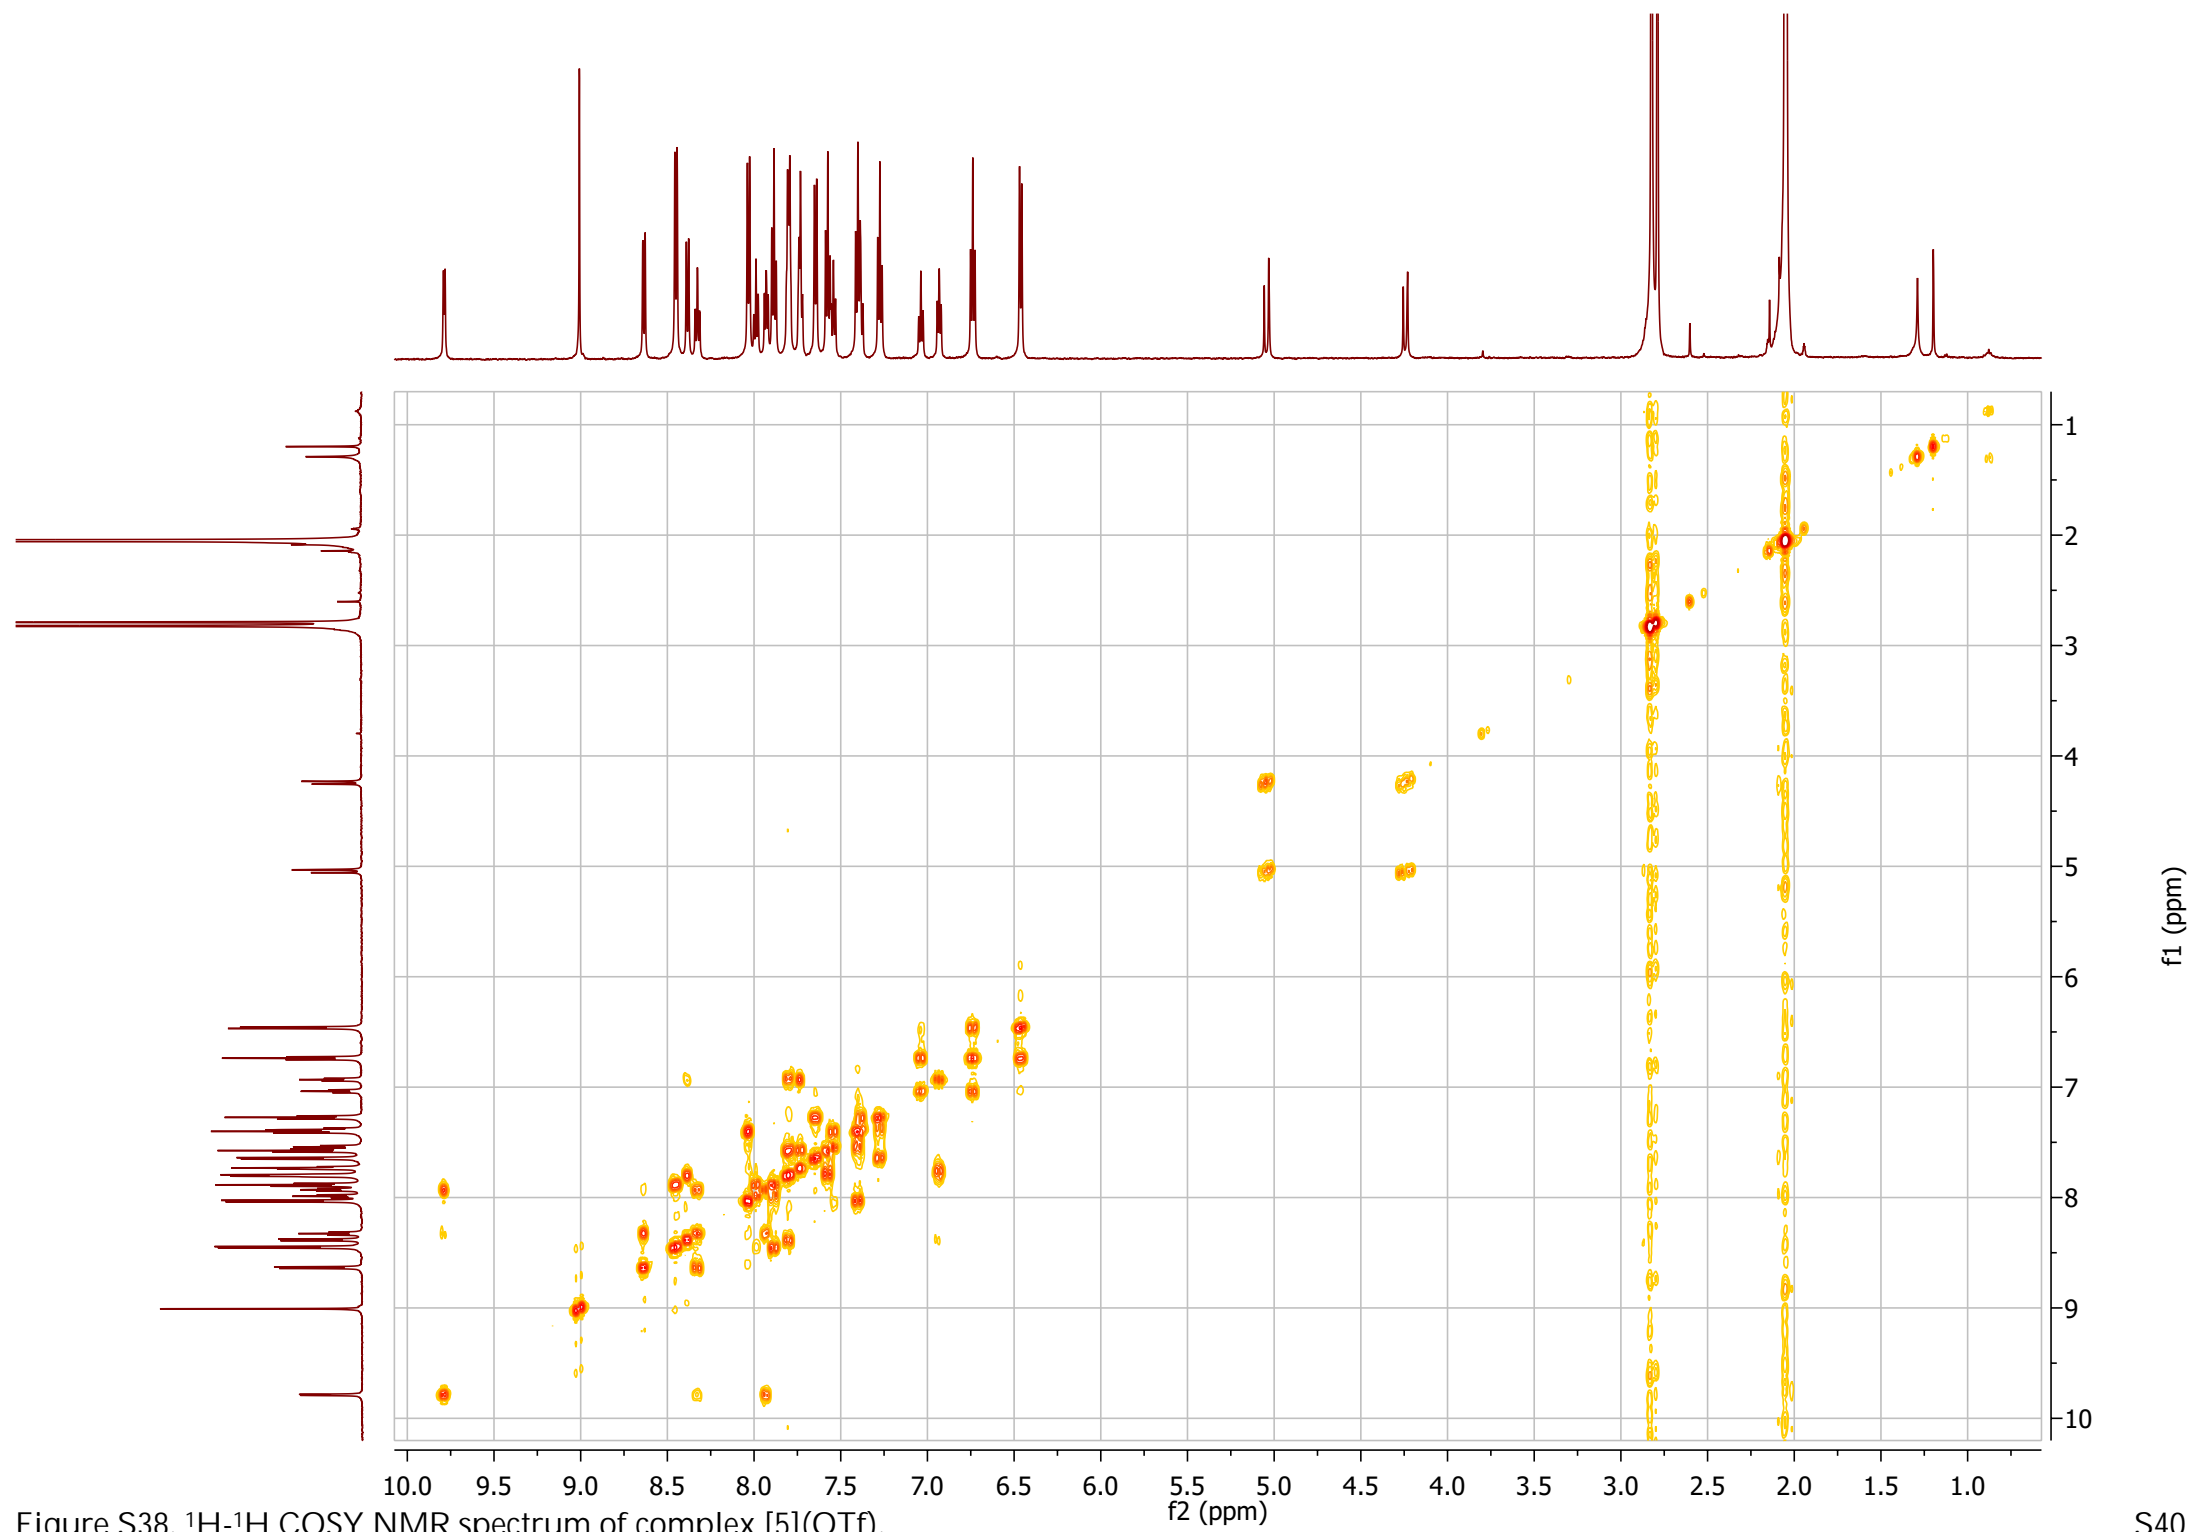

Figure S38.  $^1\text{H}$ - $^1\text{H}$  COSY NMR spectrum of complex [5](OTf).

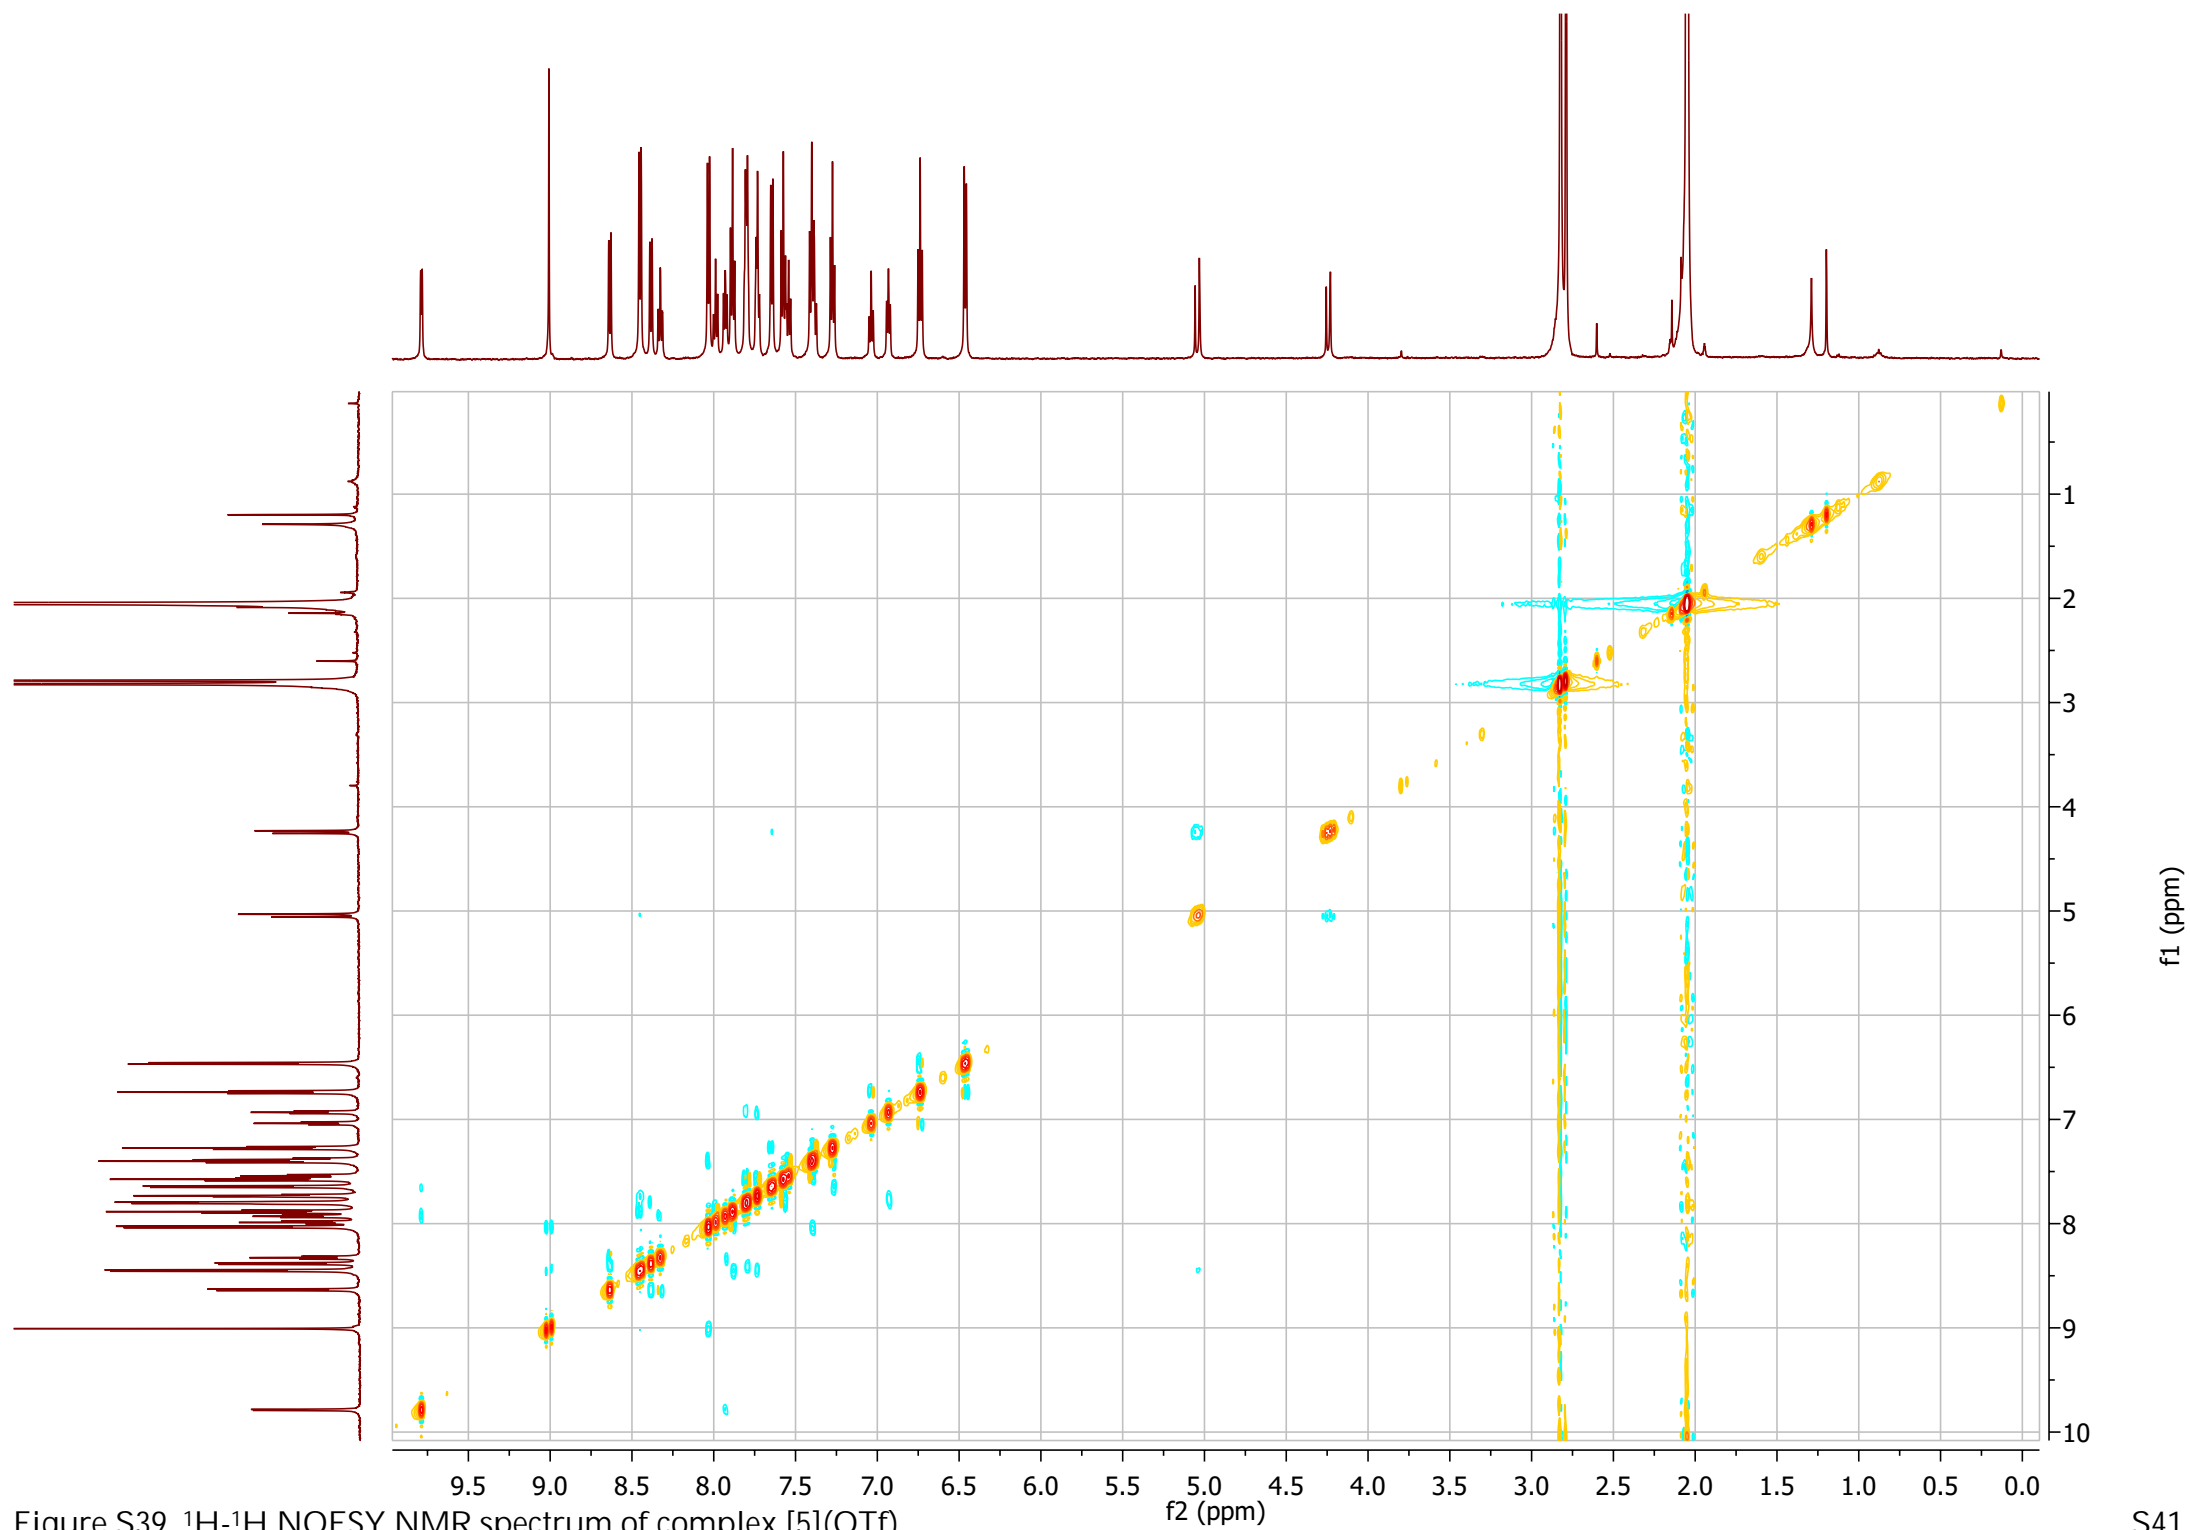

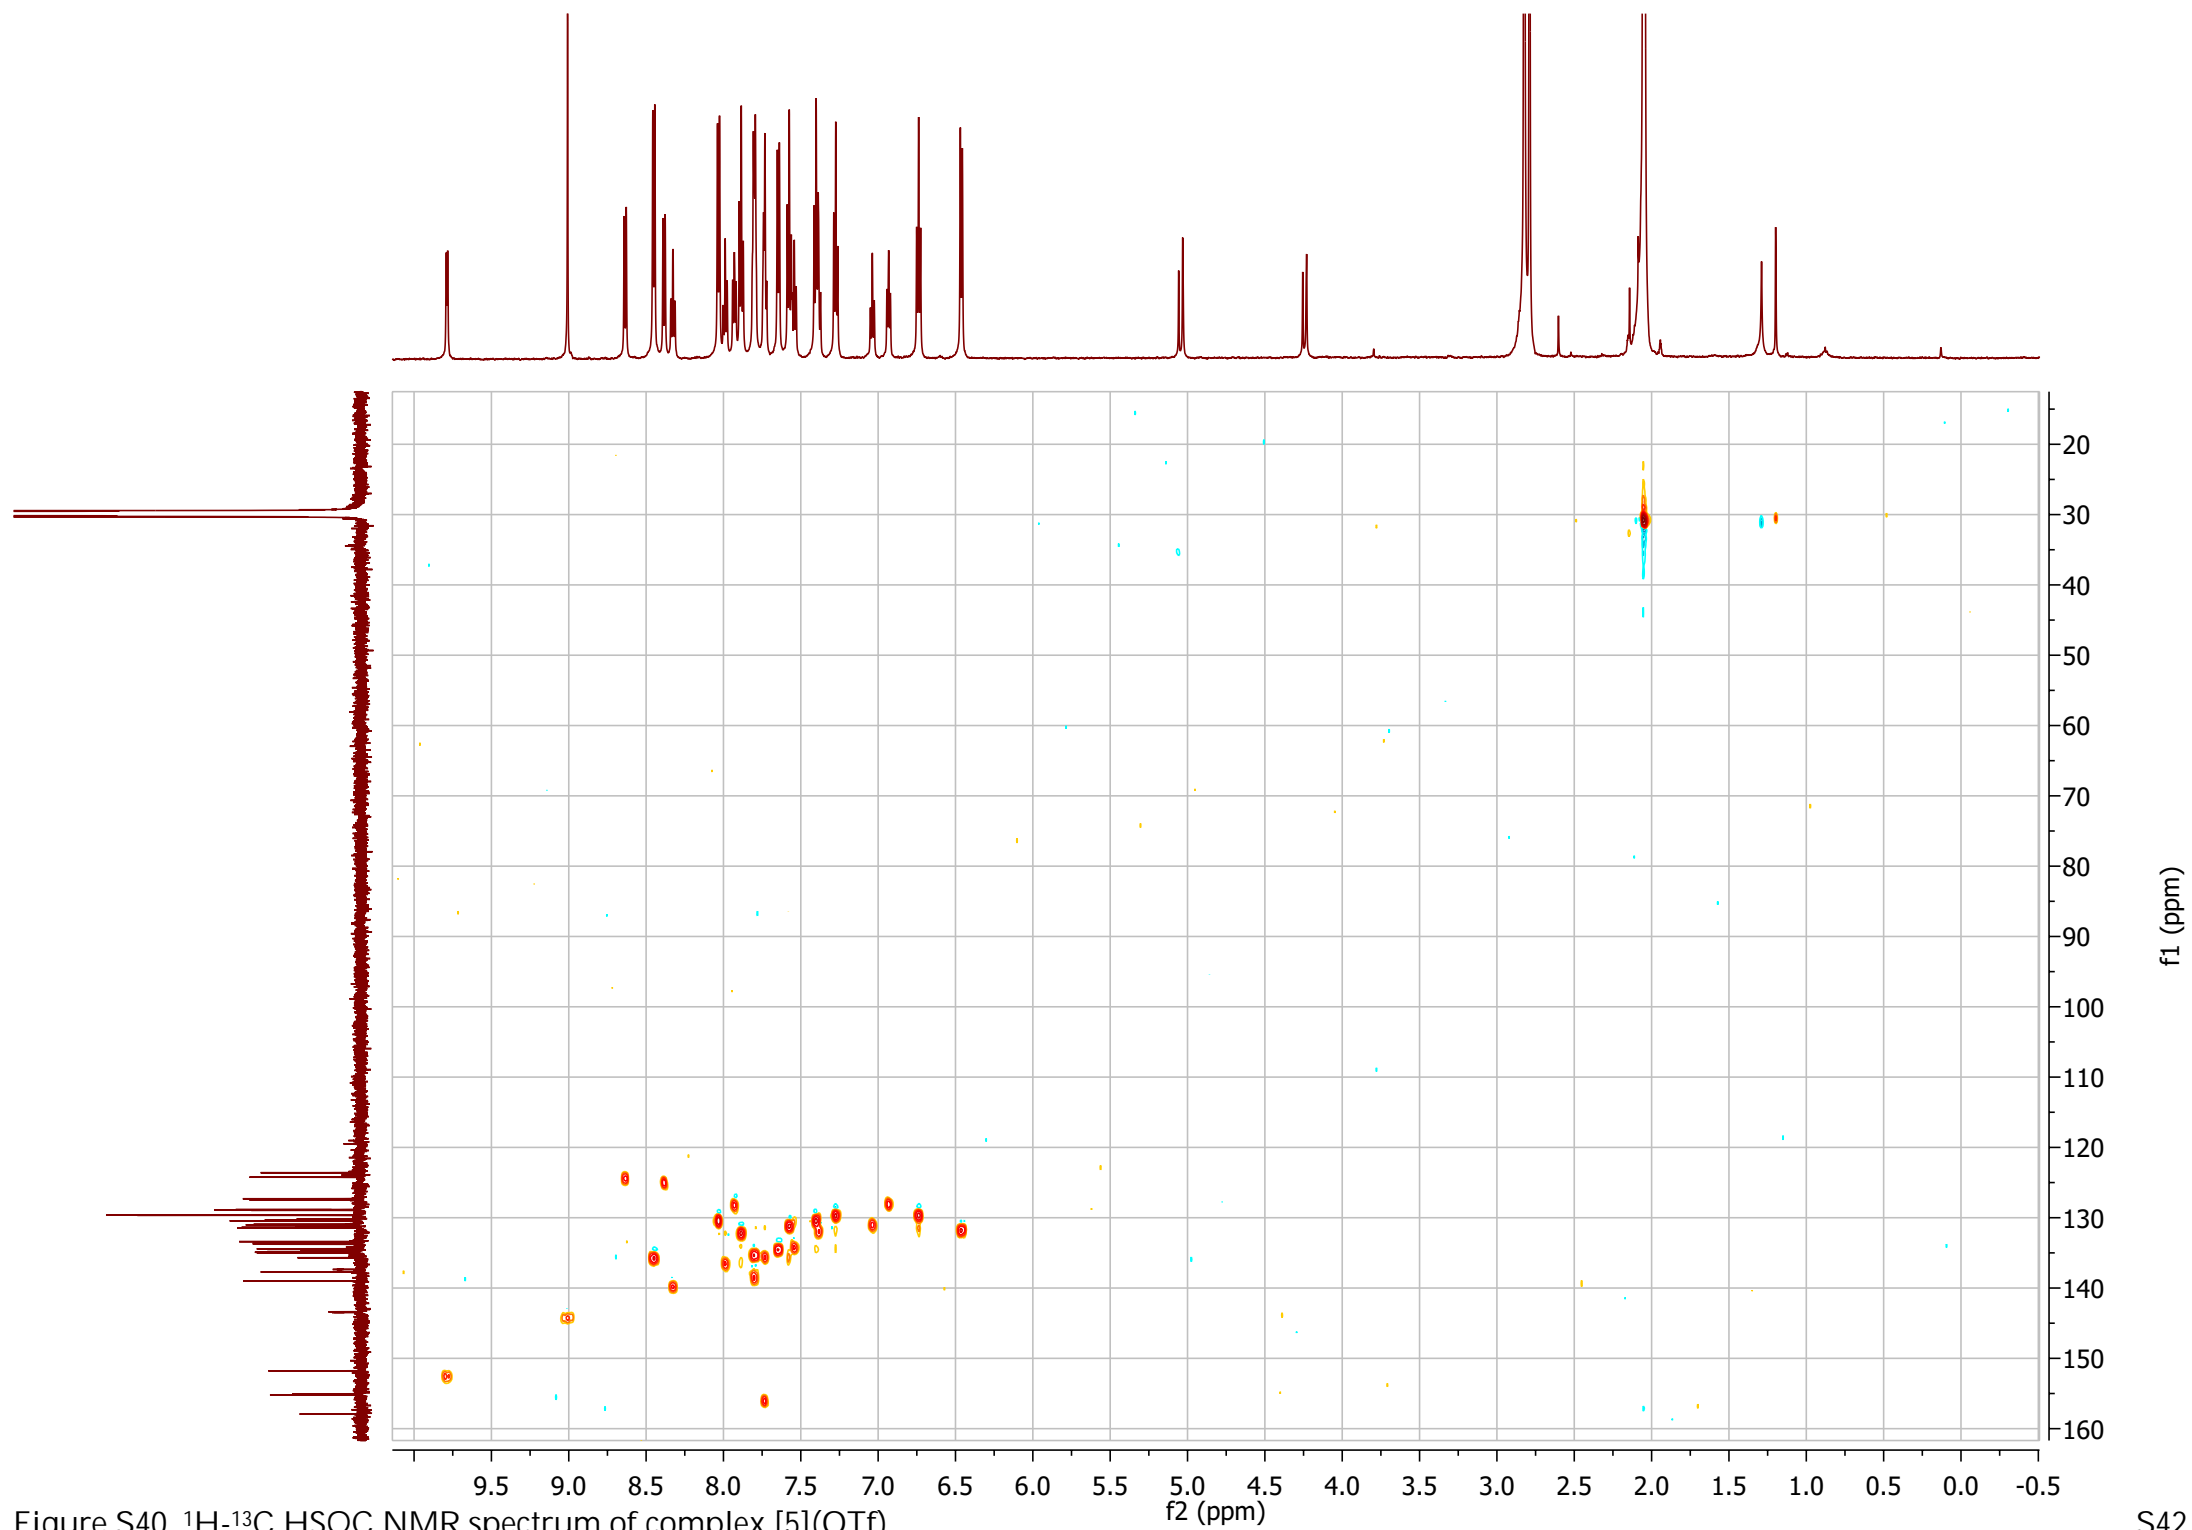

Figure S40.  $^1\text{H}$ - $^{13}\text{C}$  HSQC NMR spectrum of complex [5](OTf).

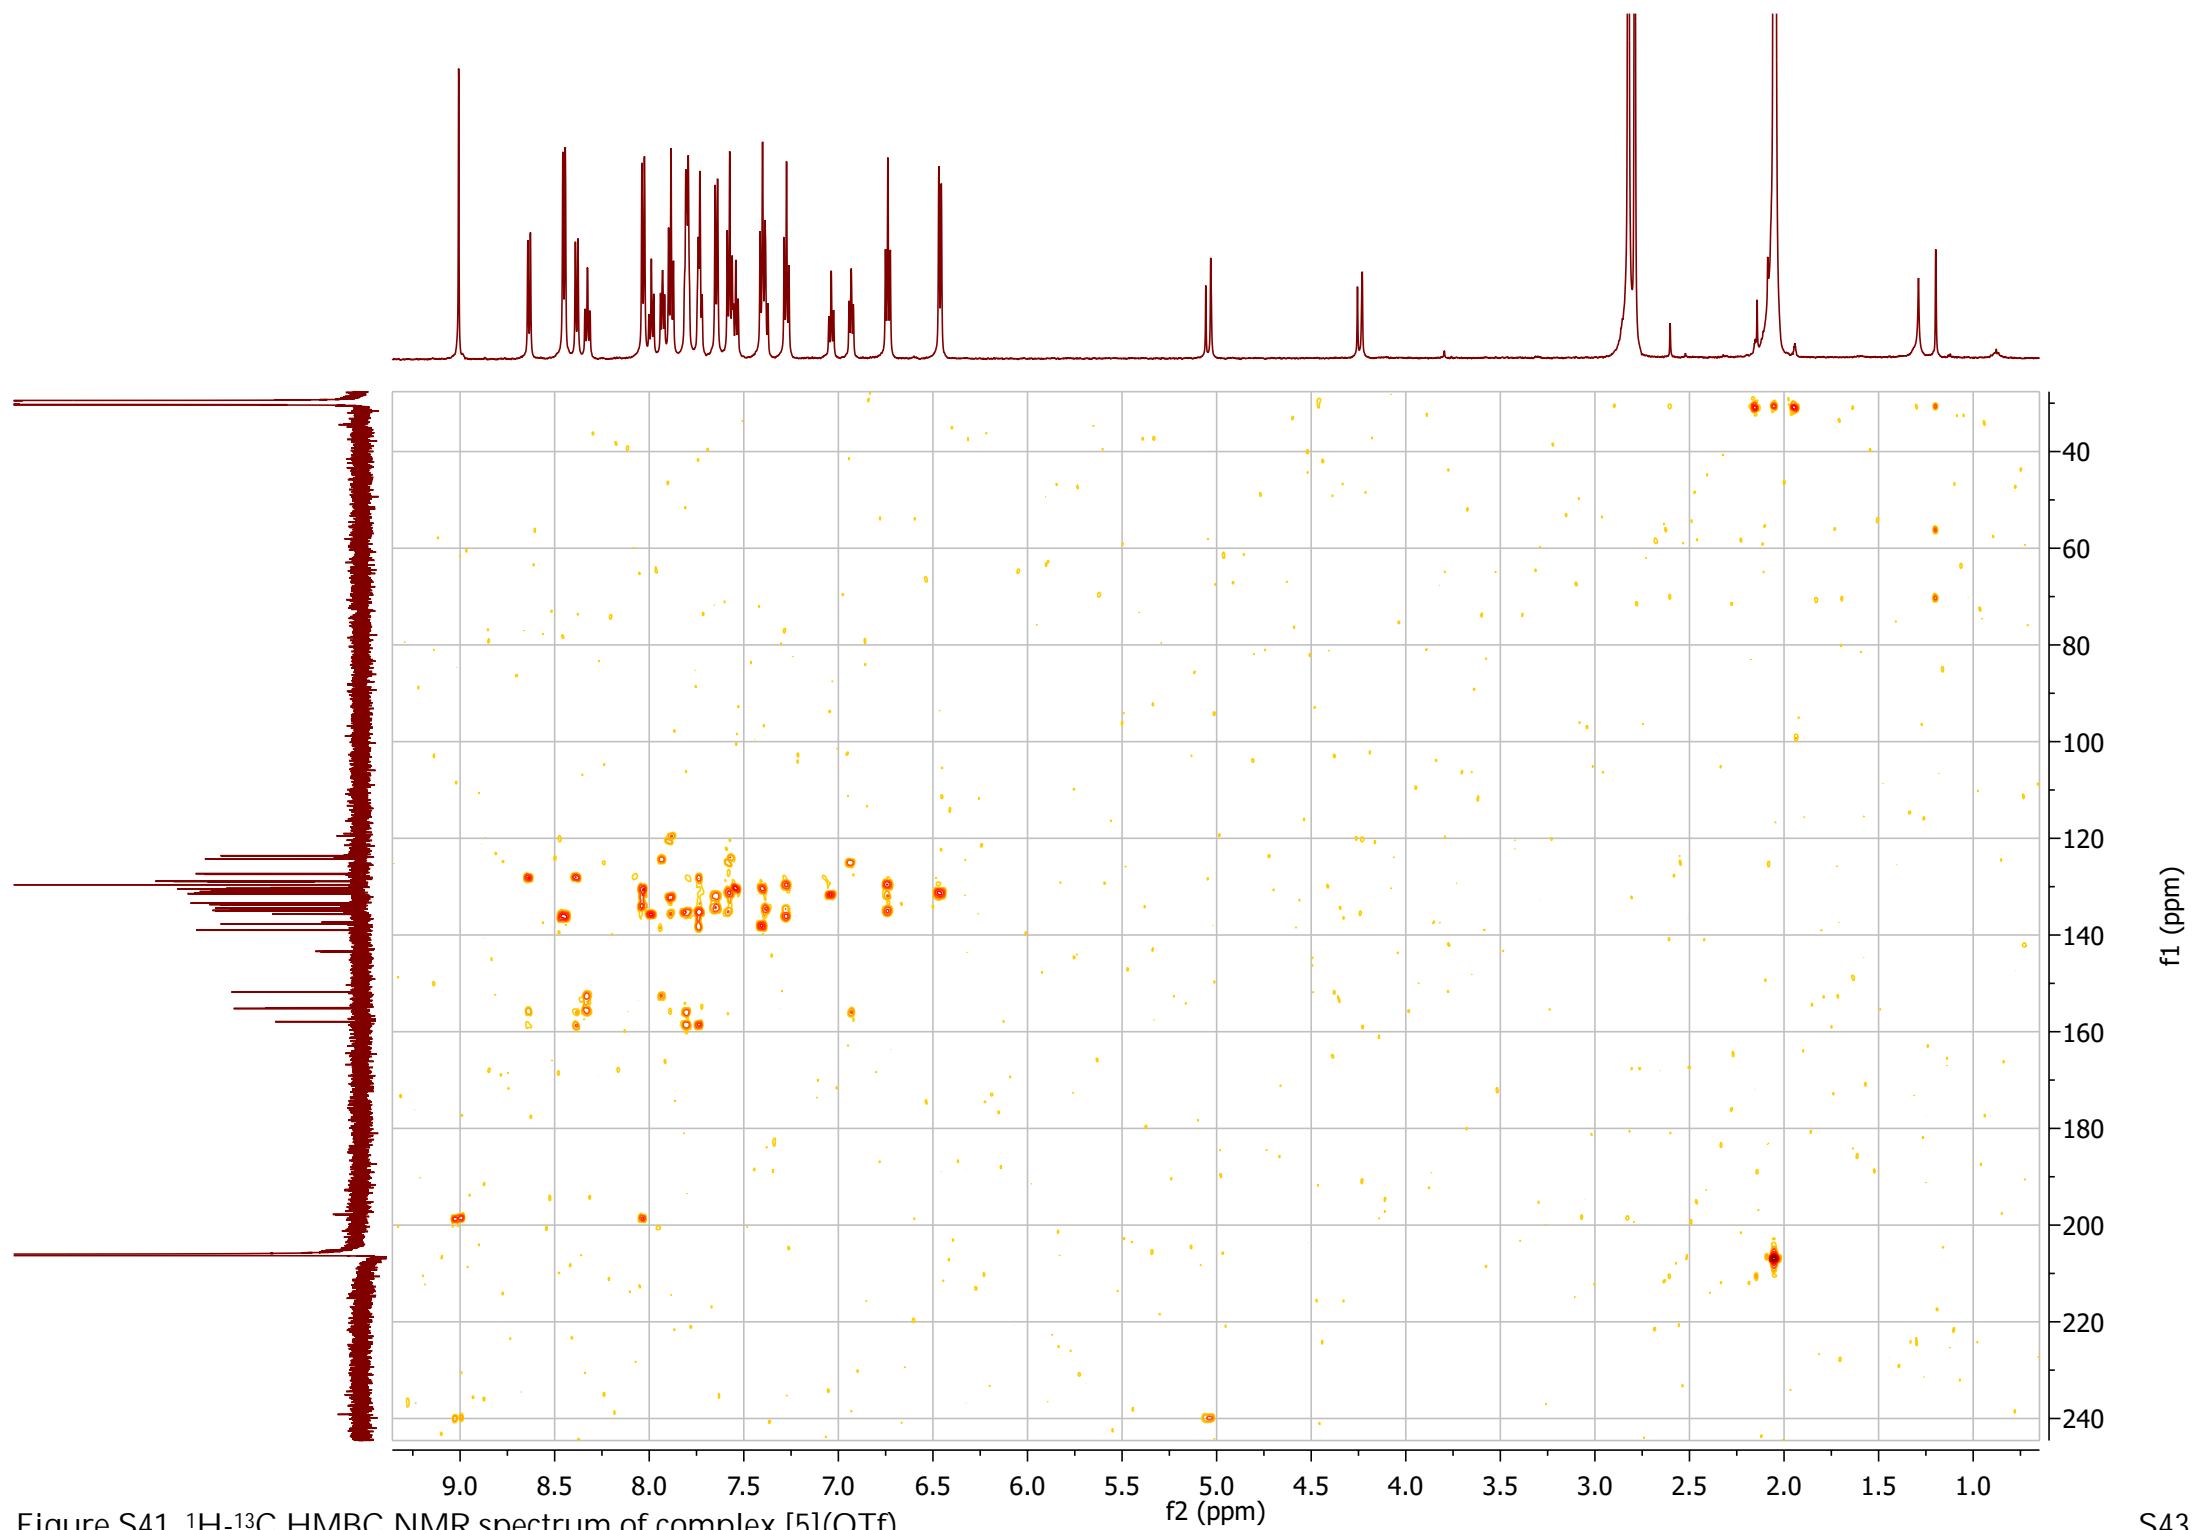

Figure S41.  $^1\text{H}$ - $^{13}\text{C}$  HMBC NMR spectrum of complex [5](OTf).

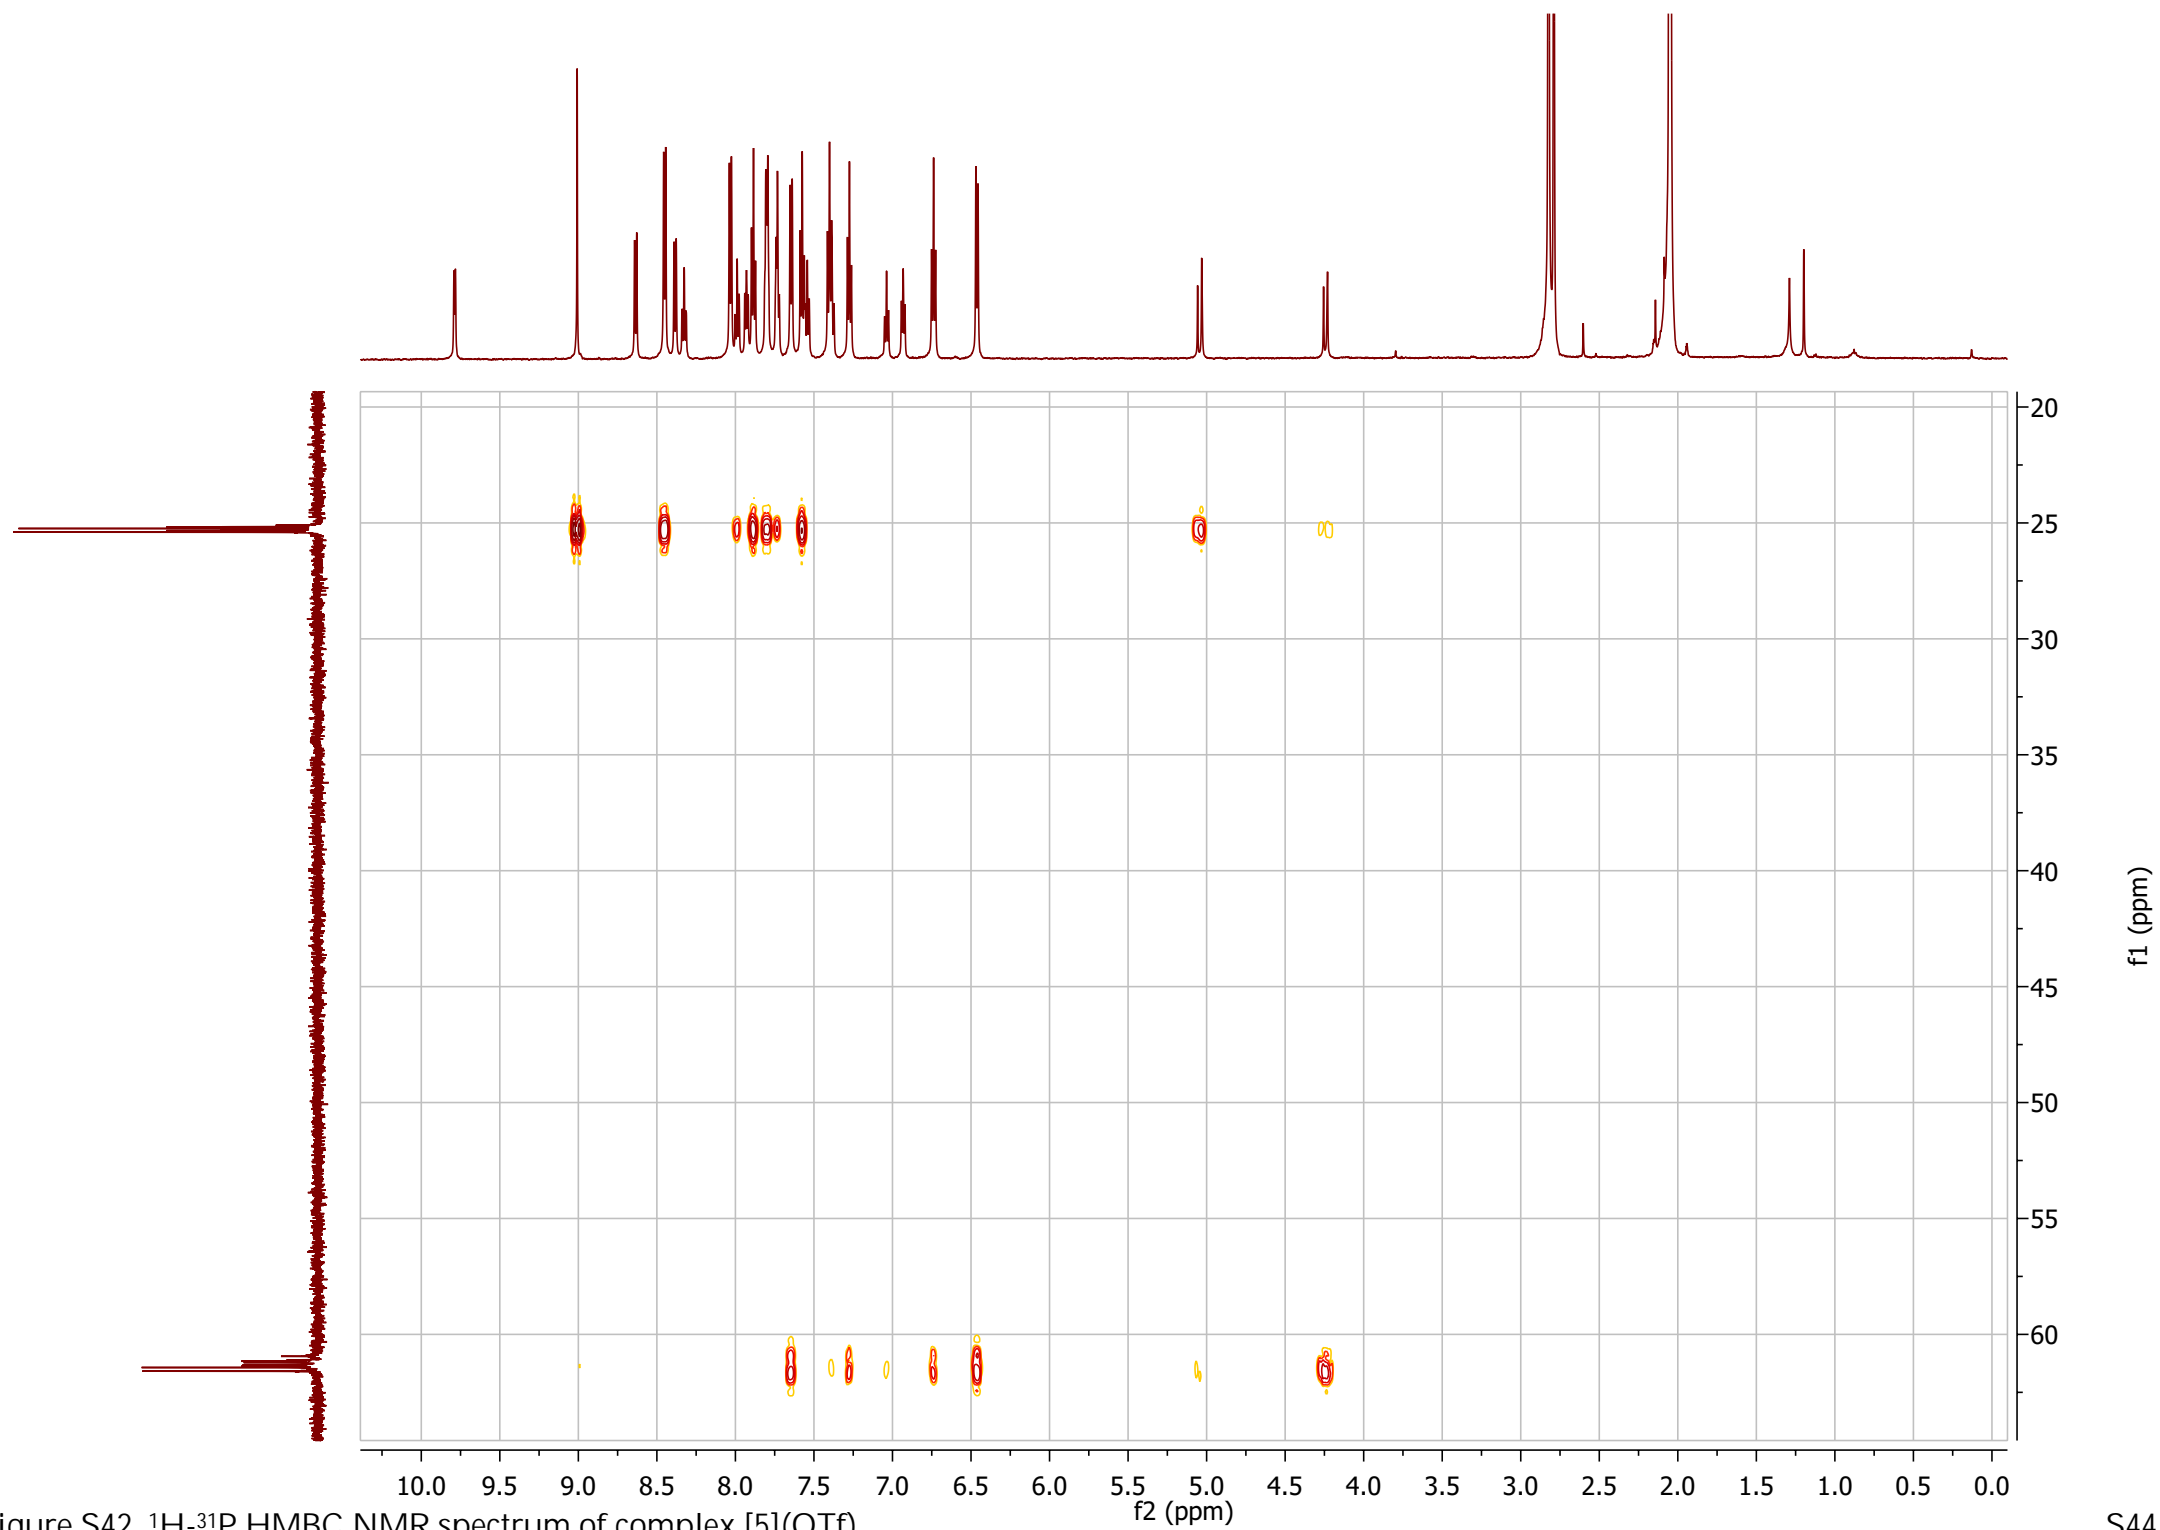

Figure S42.  $^1\text{H}$ - $^{31}\text{P}$  HMBC NMR spectrum of complex  $[5](\text{OTf})$ .



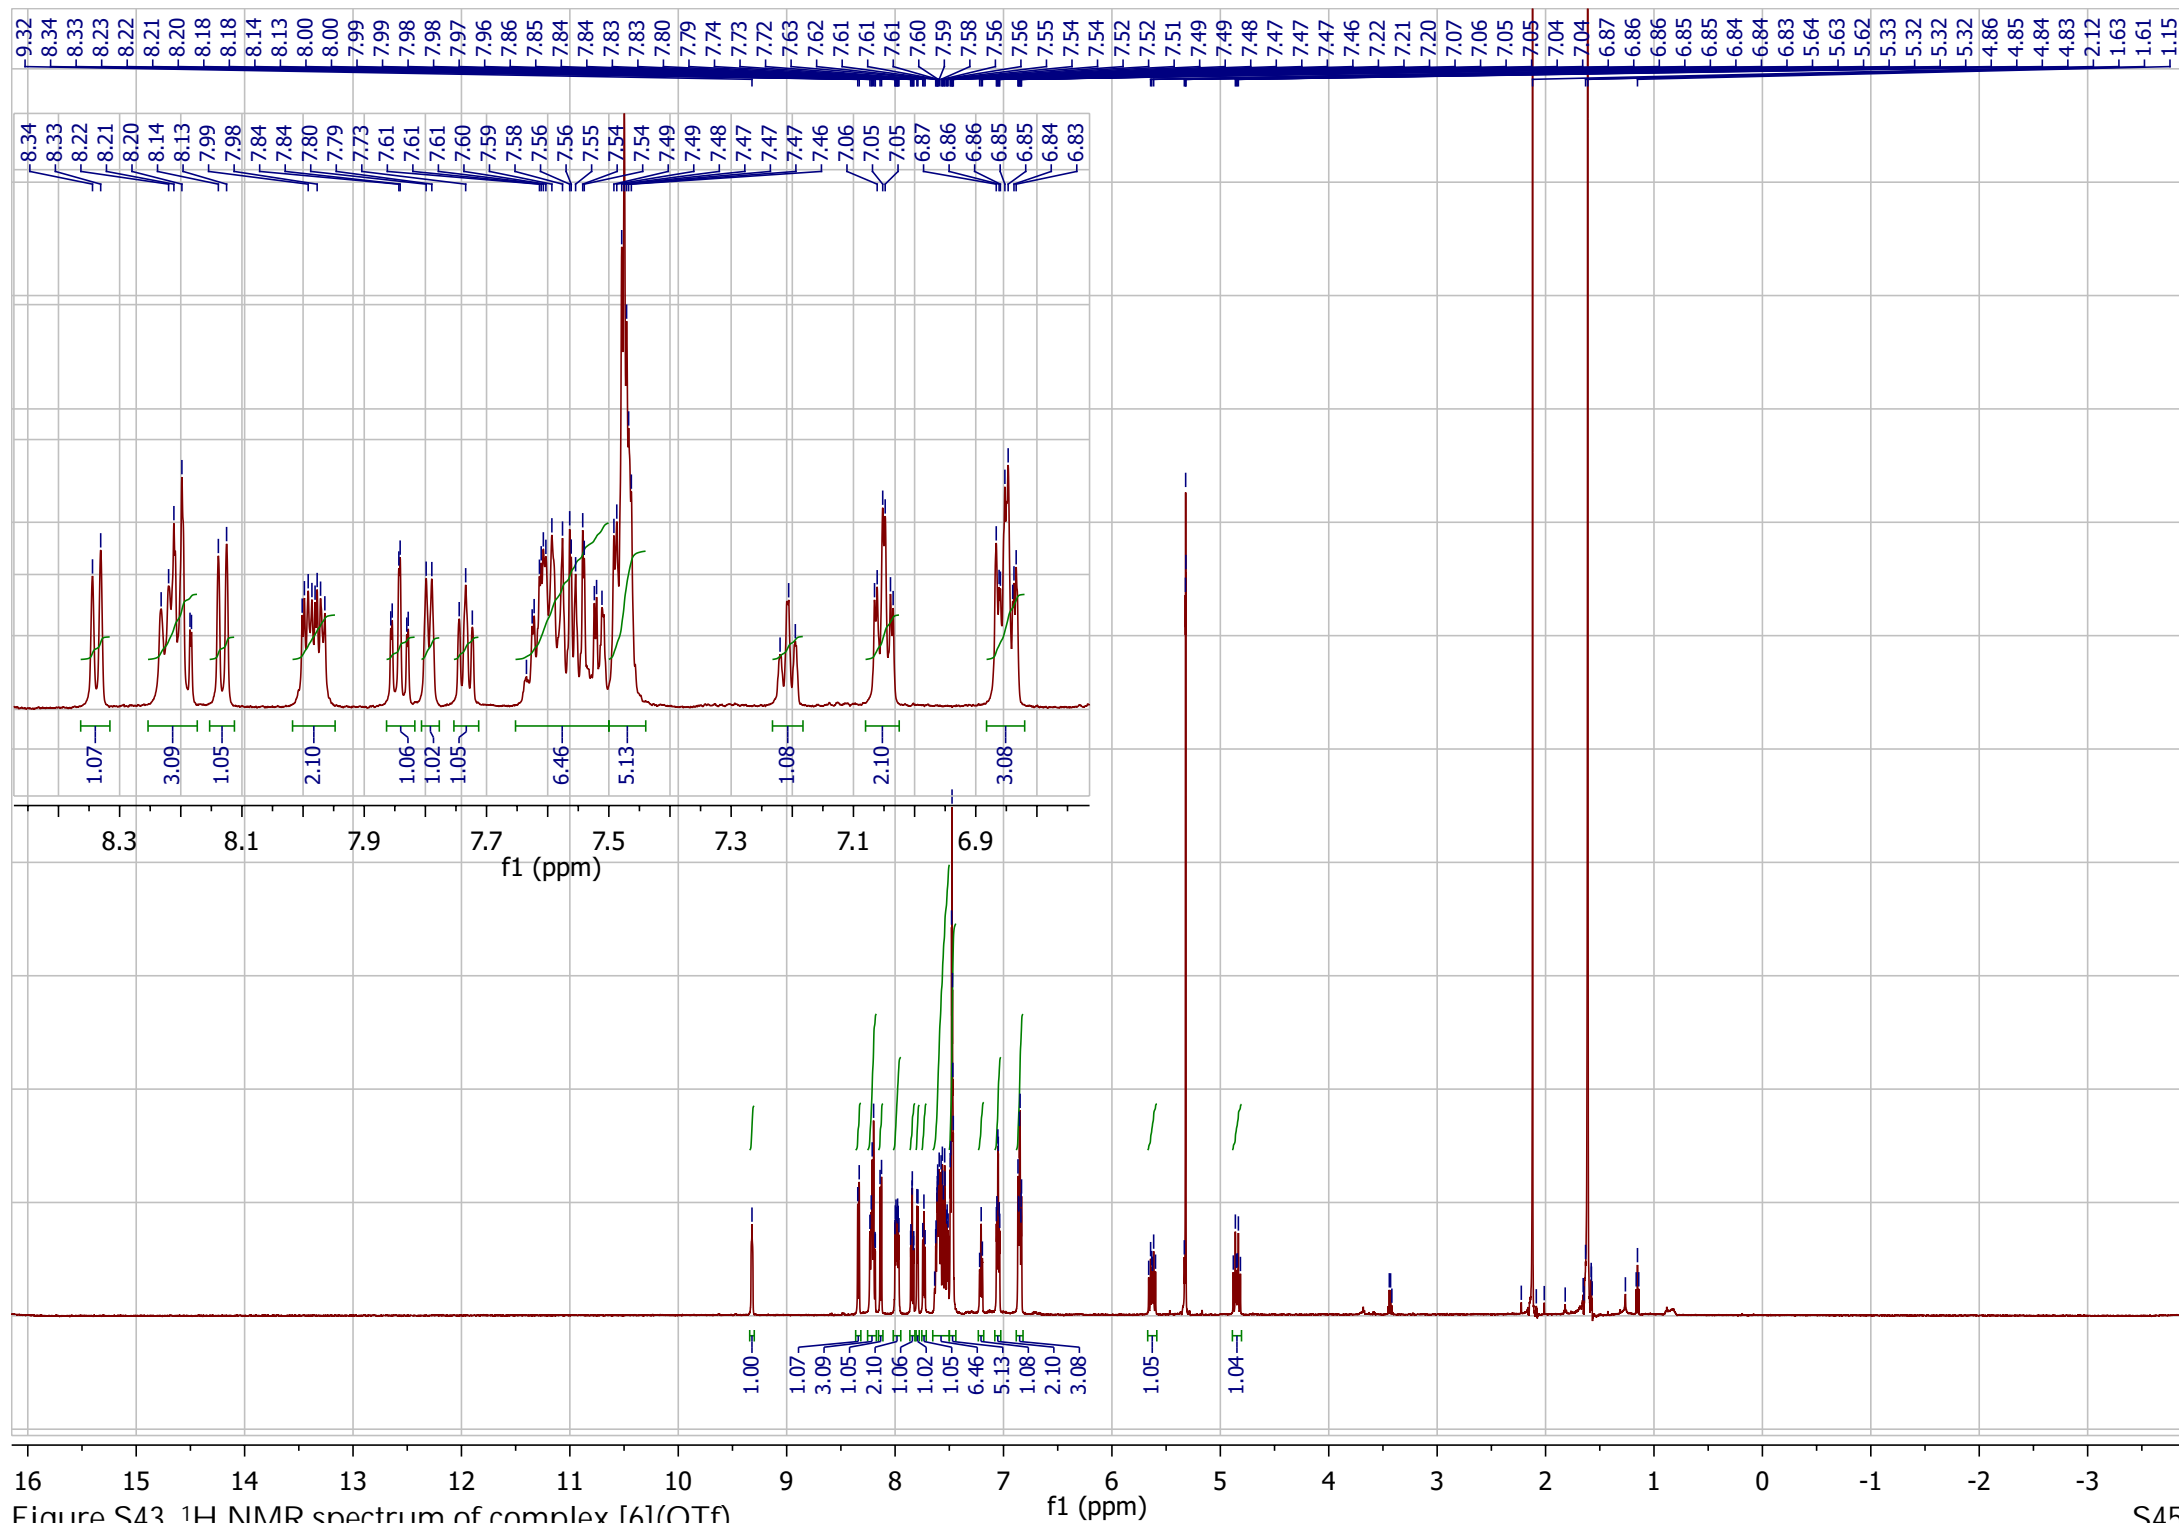

Figure S43.  $^1\text{H}$  NMR spectrum of complex  $[6](\text{OTf})$ .

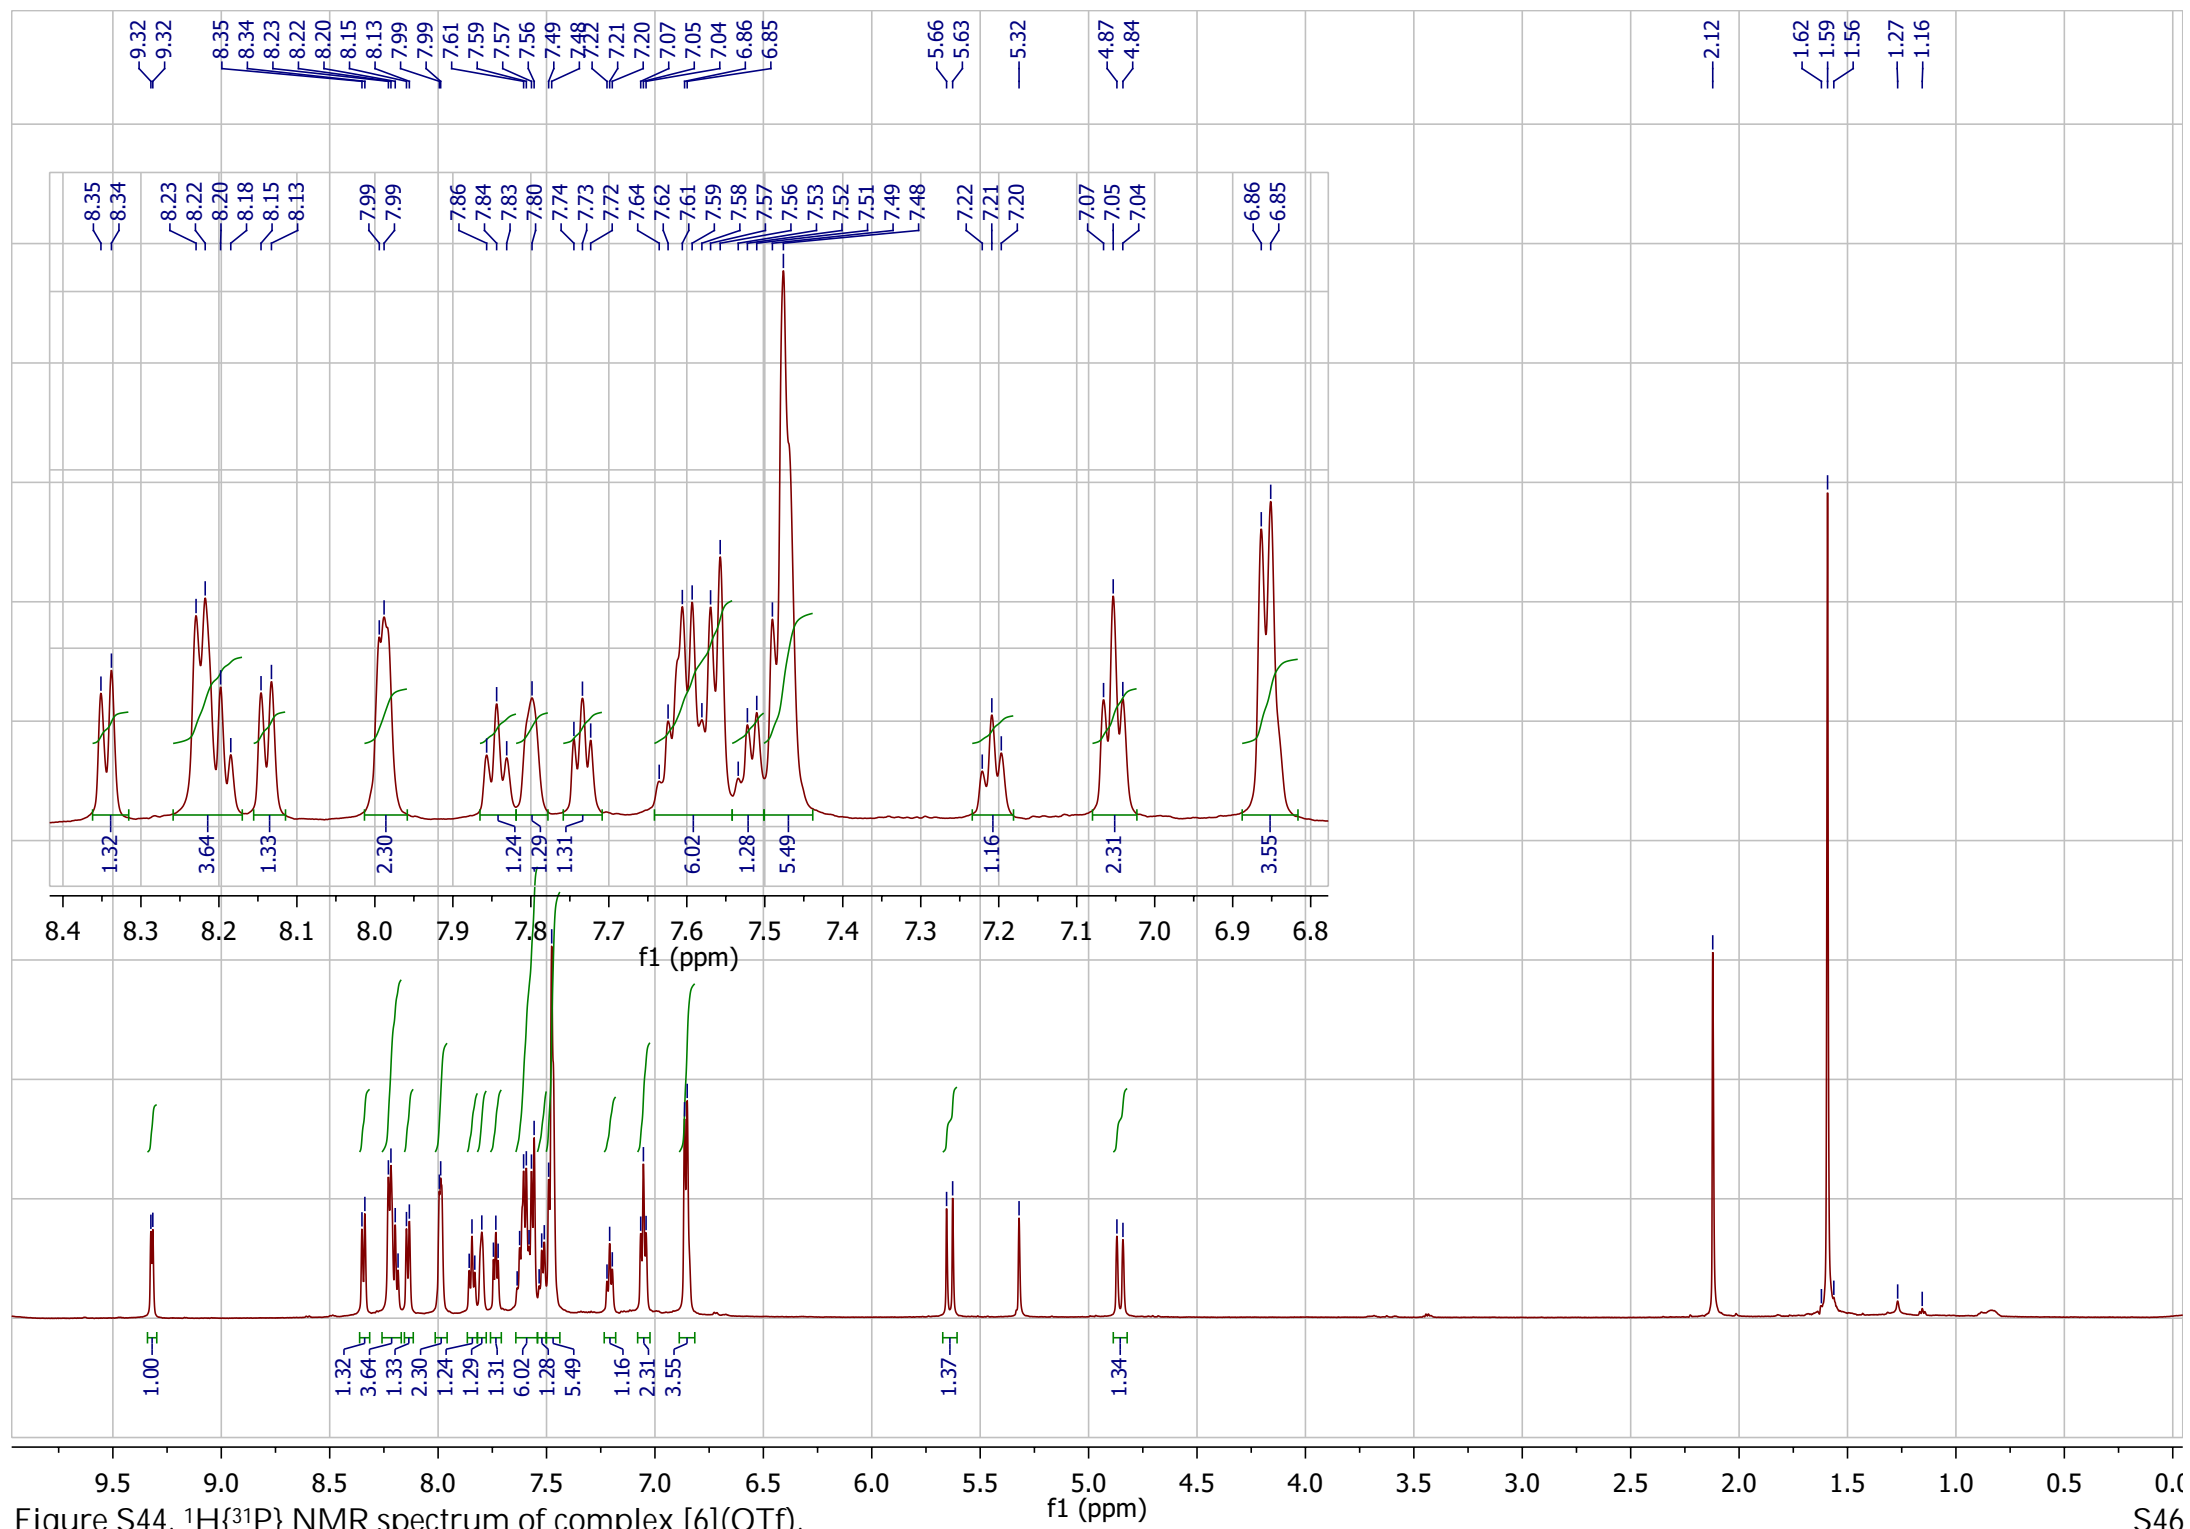

Figure S44.  $^1\text{H}\{^{31}\text{P}\}$  NMR spectrum of complex  $[6](\text{OTf})$ .

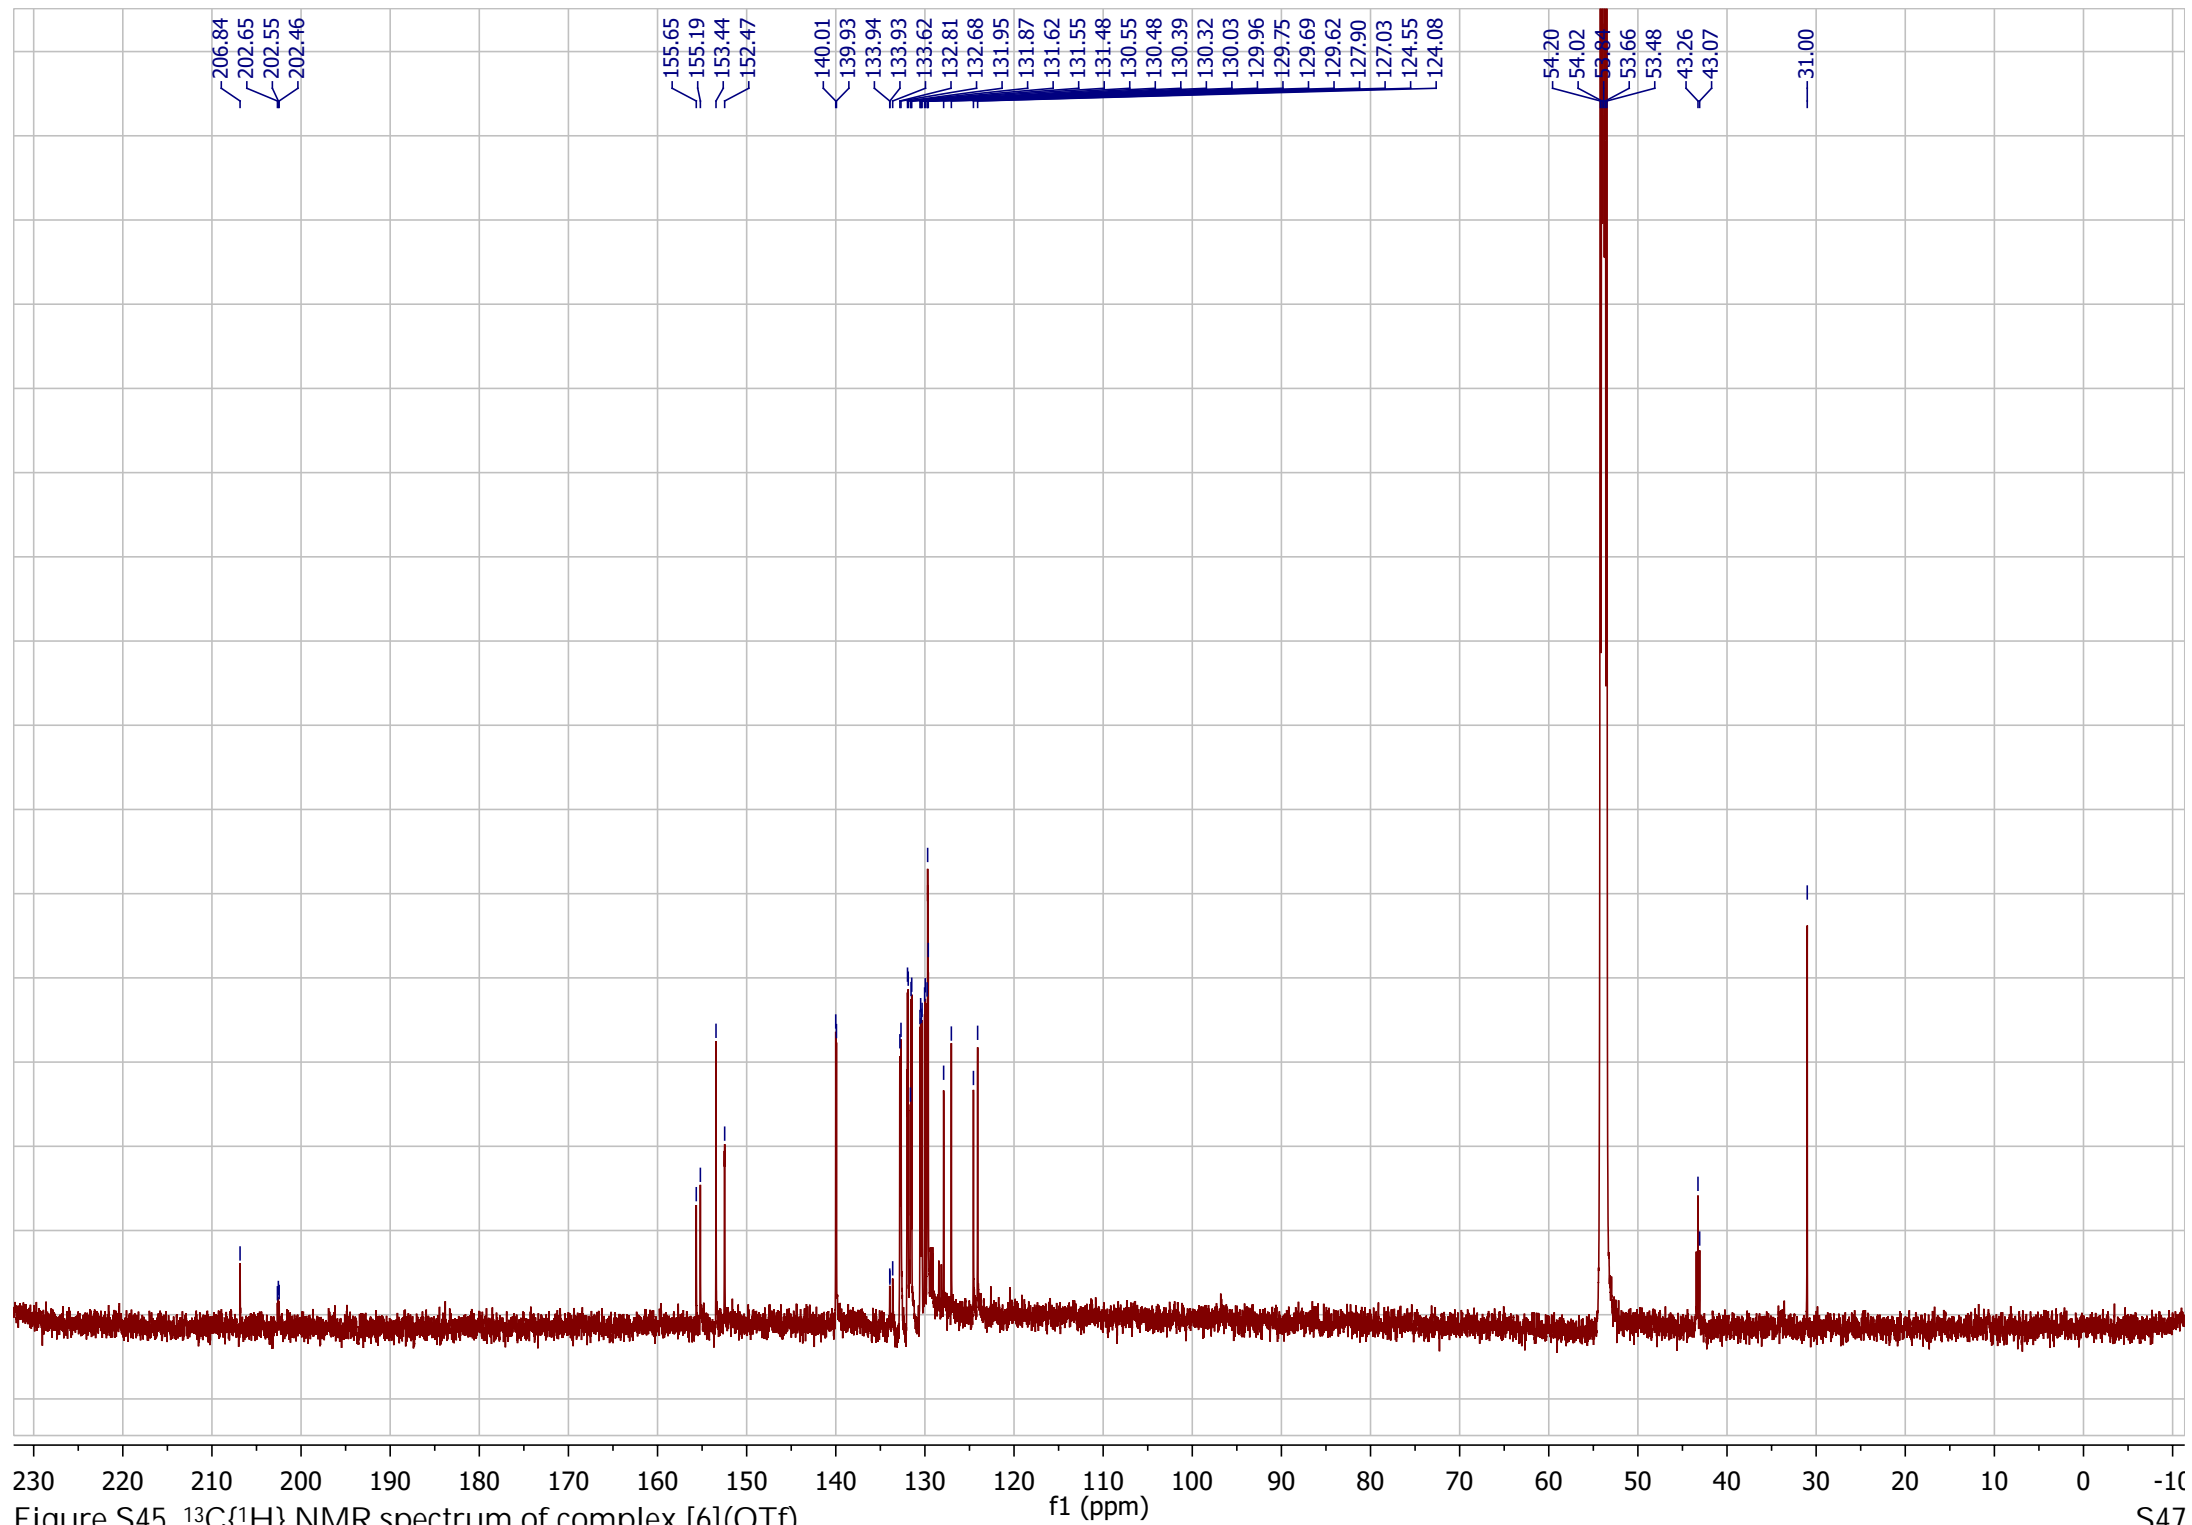

Figure S45.  $^{13}\text{C}\{^1\text{H}\}$  NMR spectrum of complex [6](OTf).

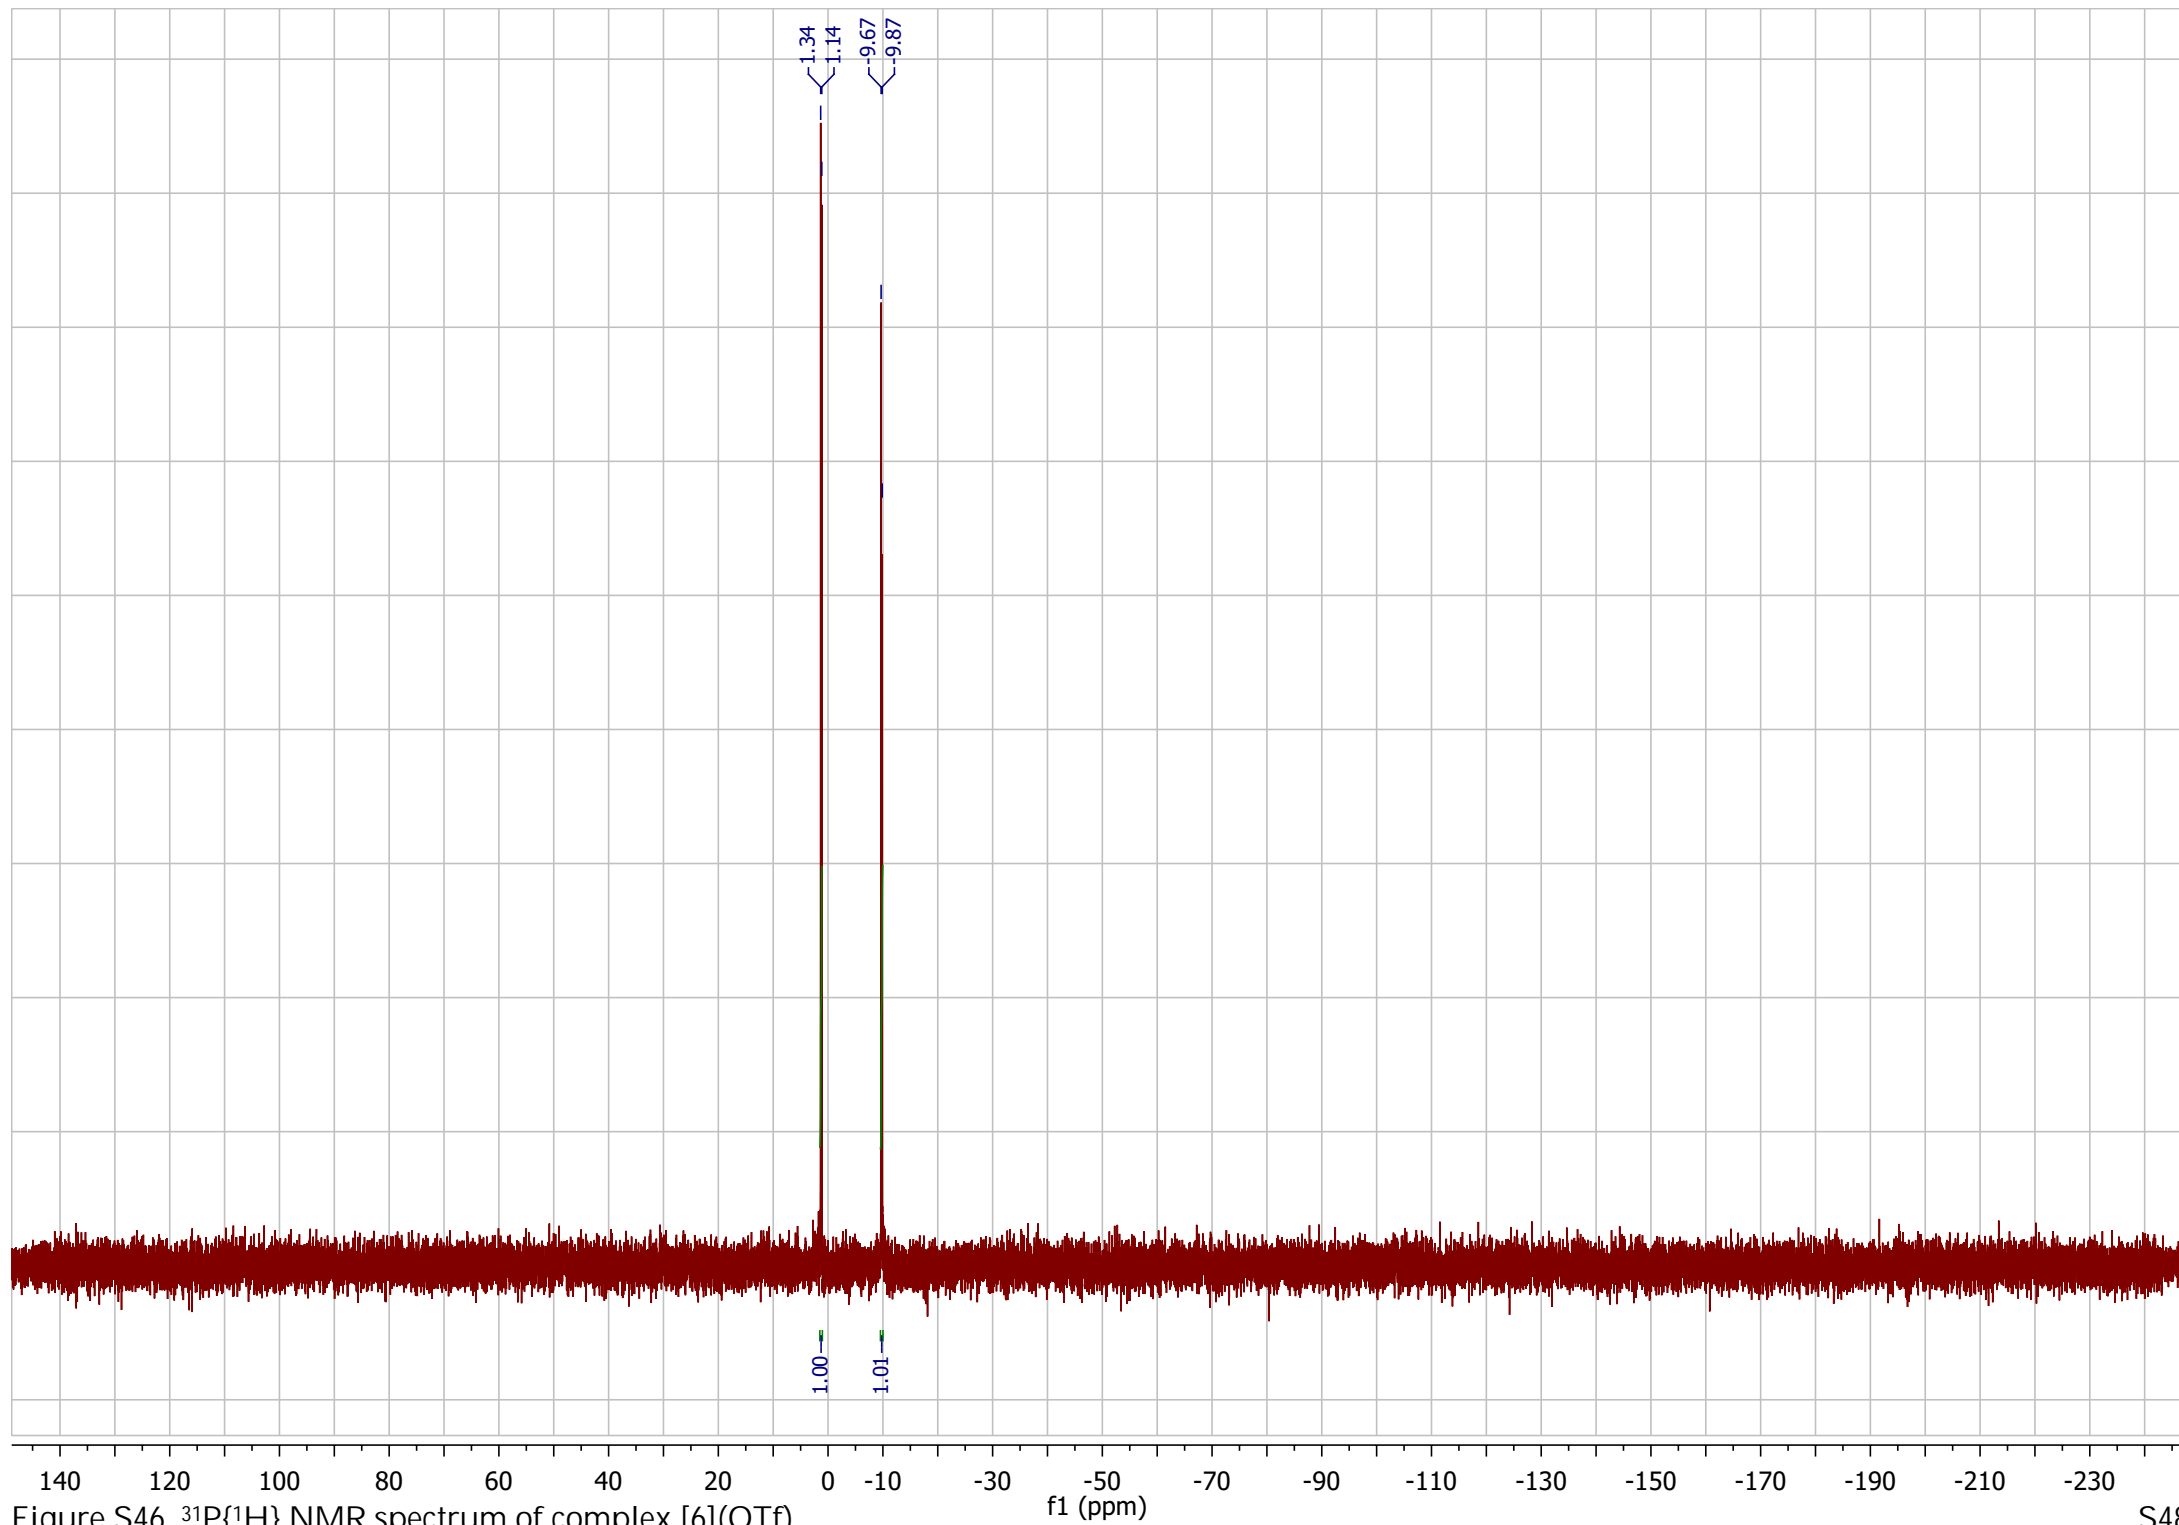

Figure S46.  $^{31}\text{P}\{^1\text{H}\}$  NMR spectrum of complex [6](OTf).

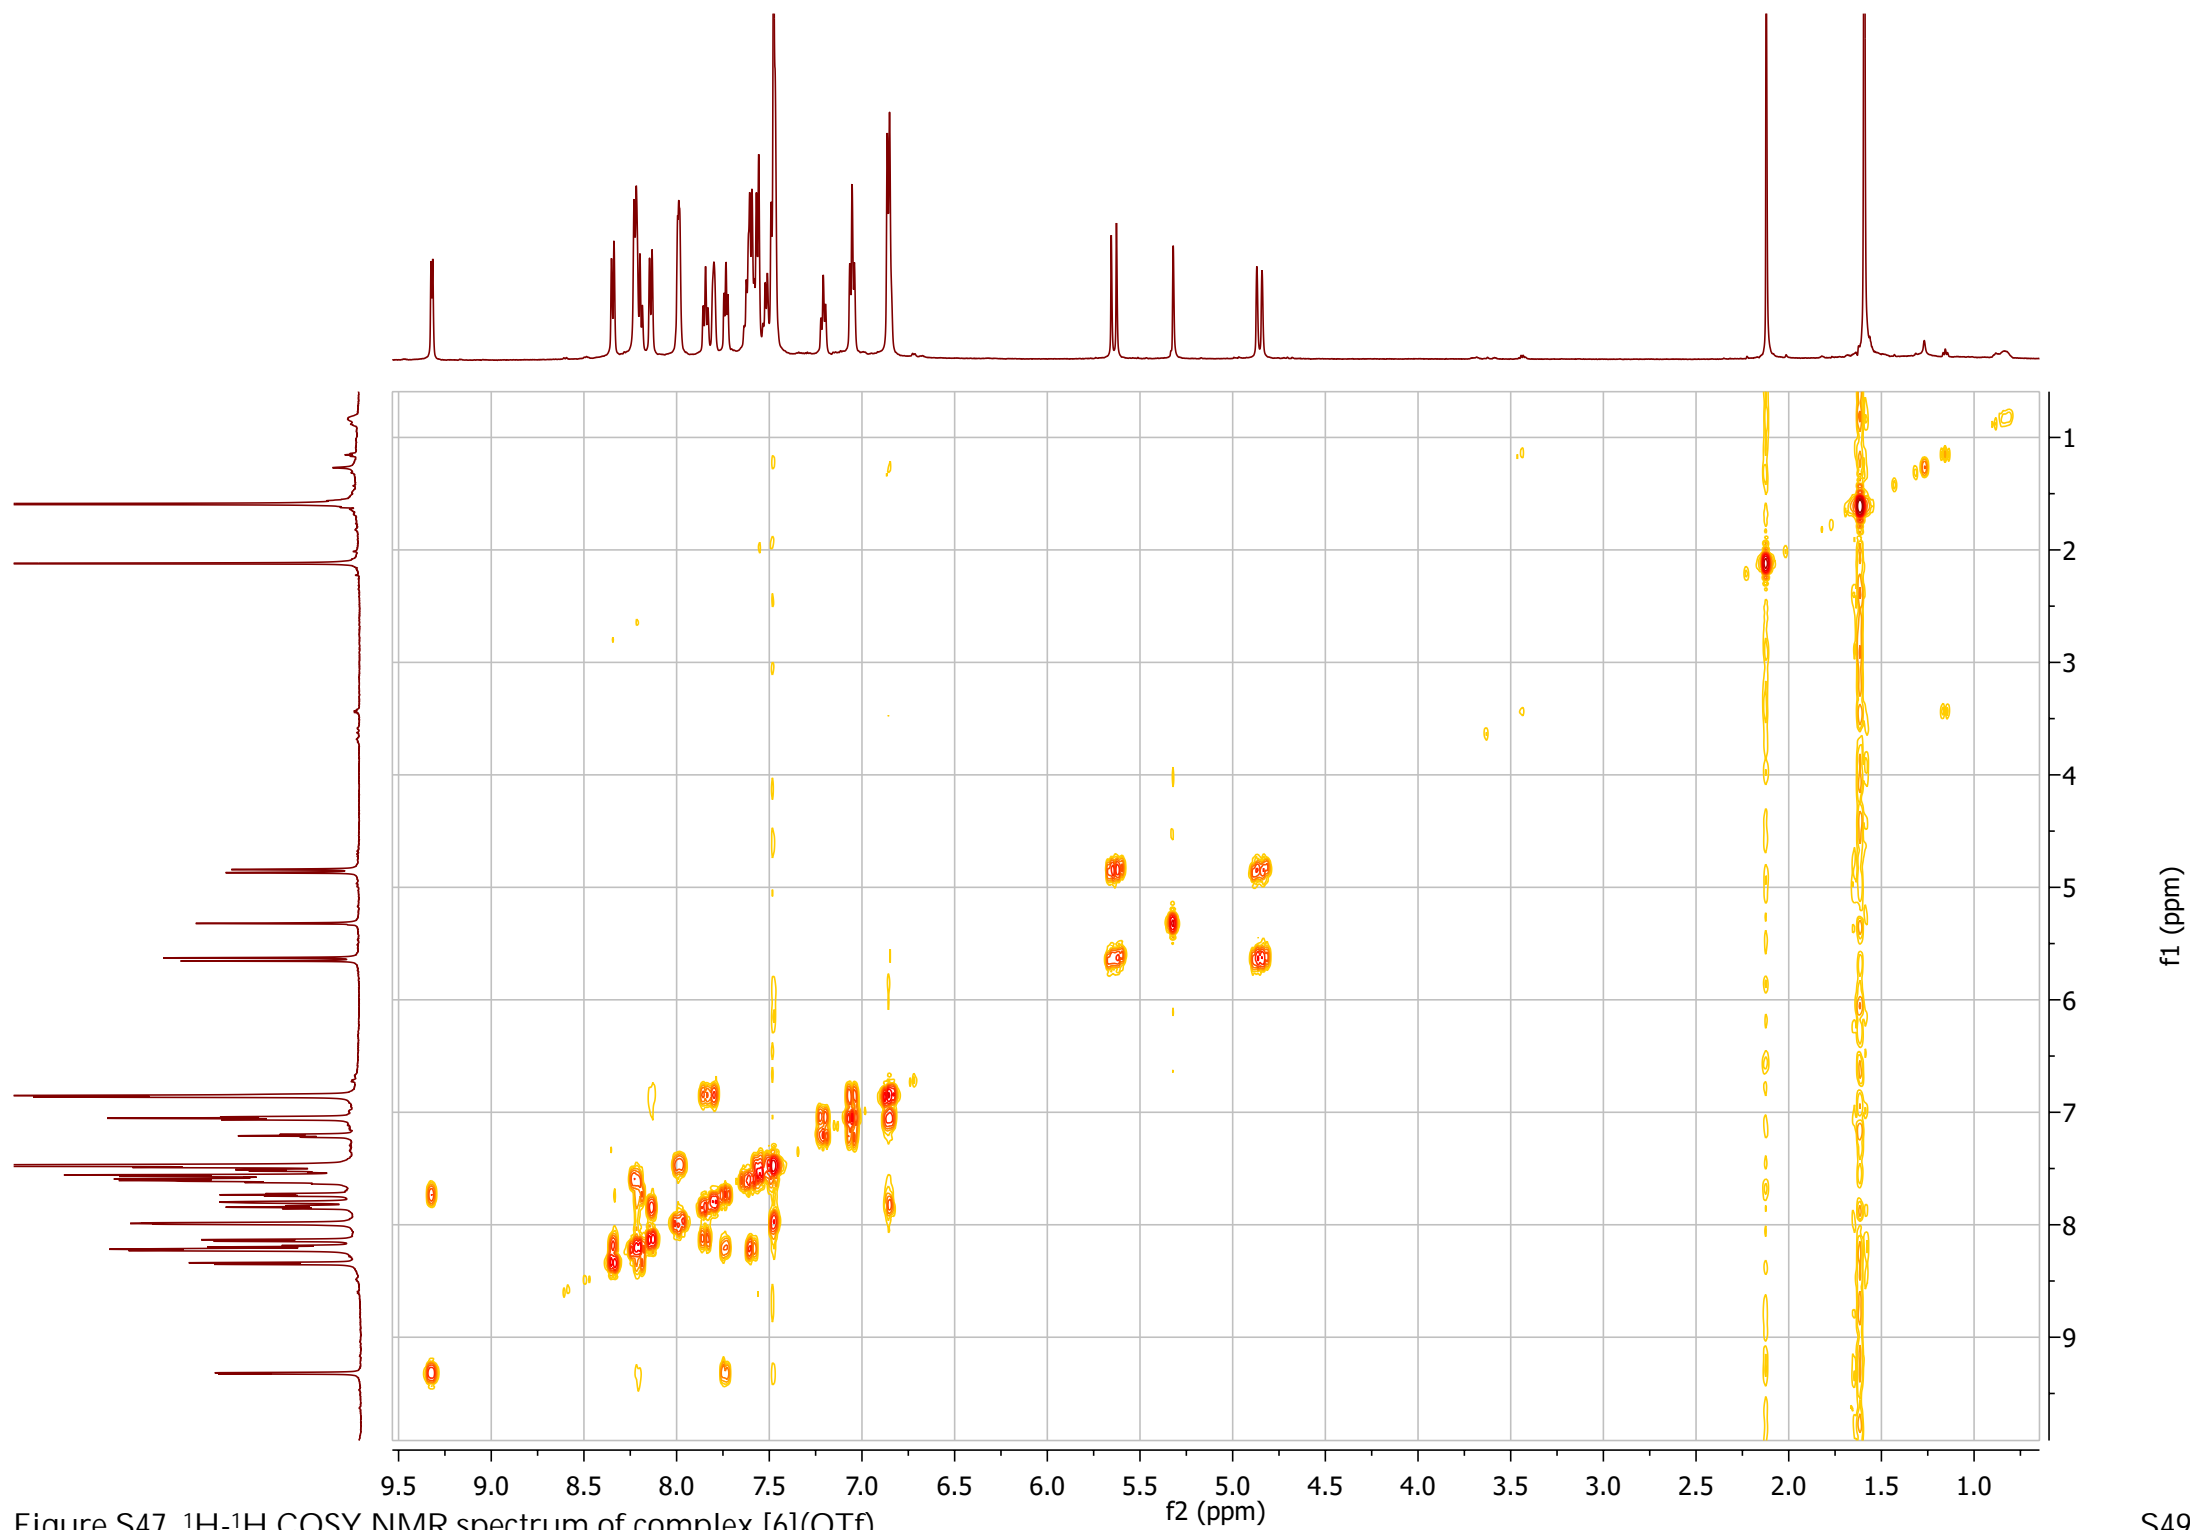

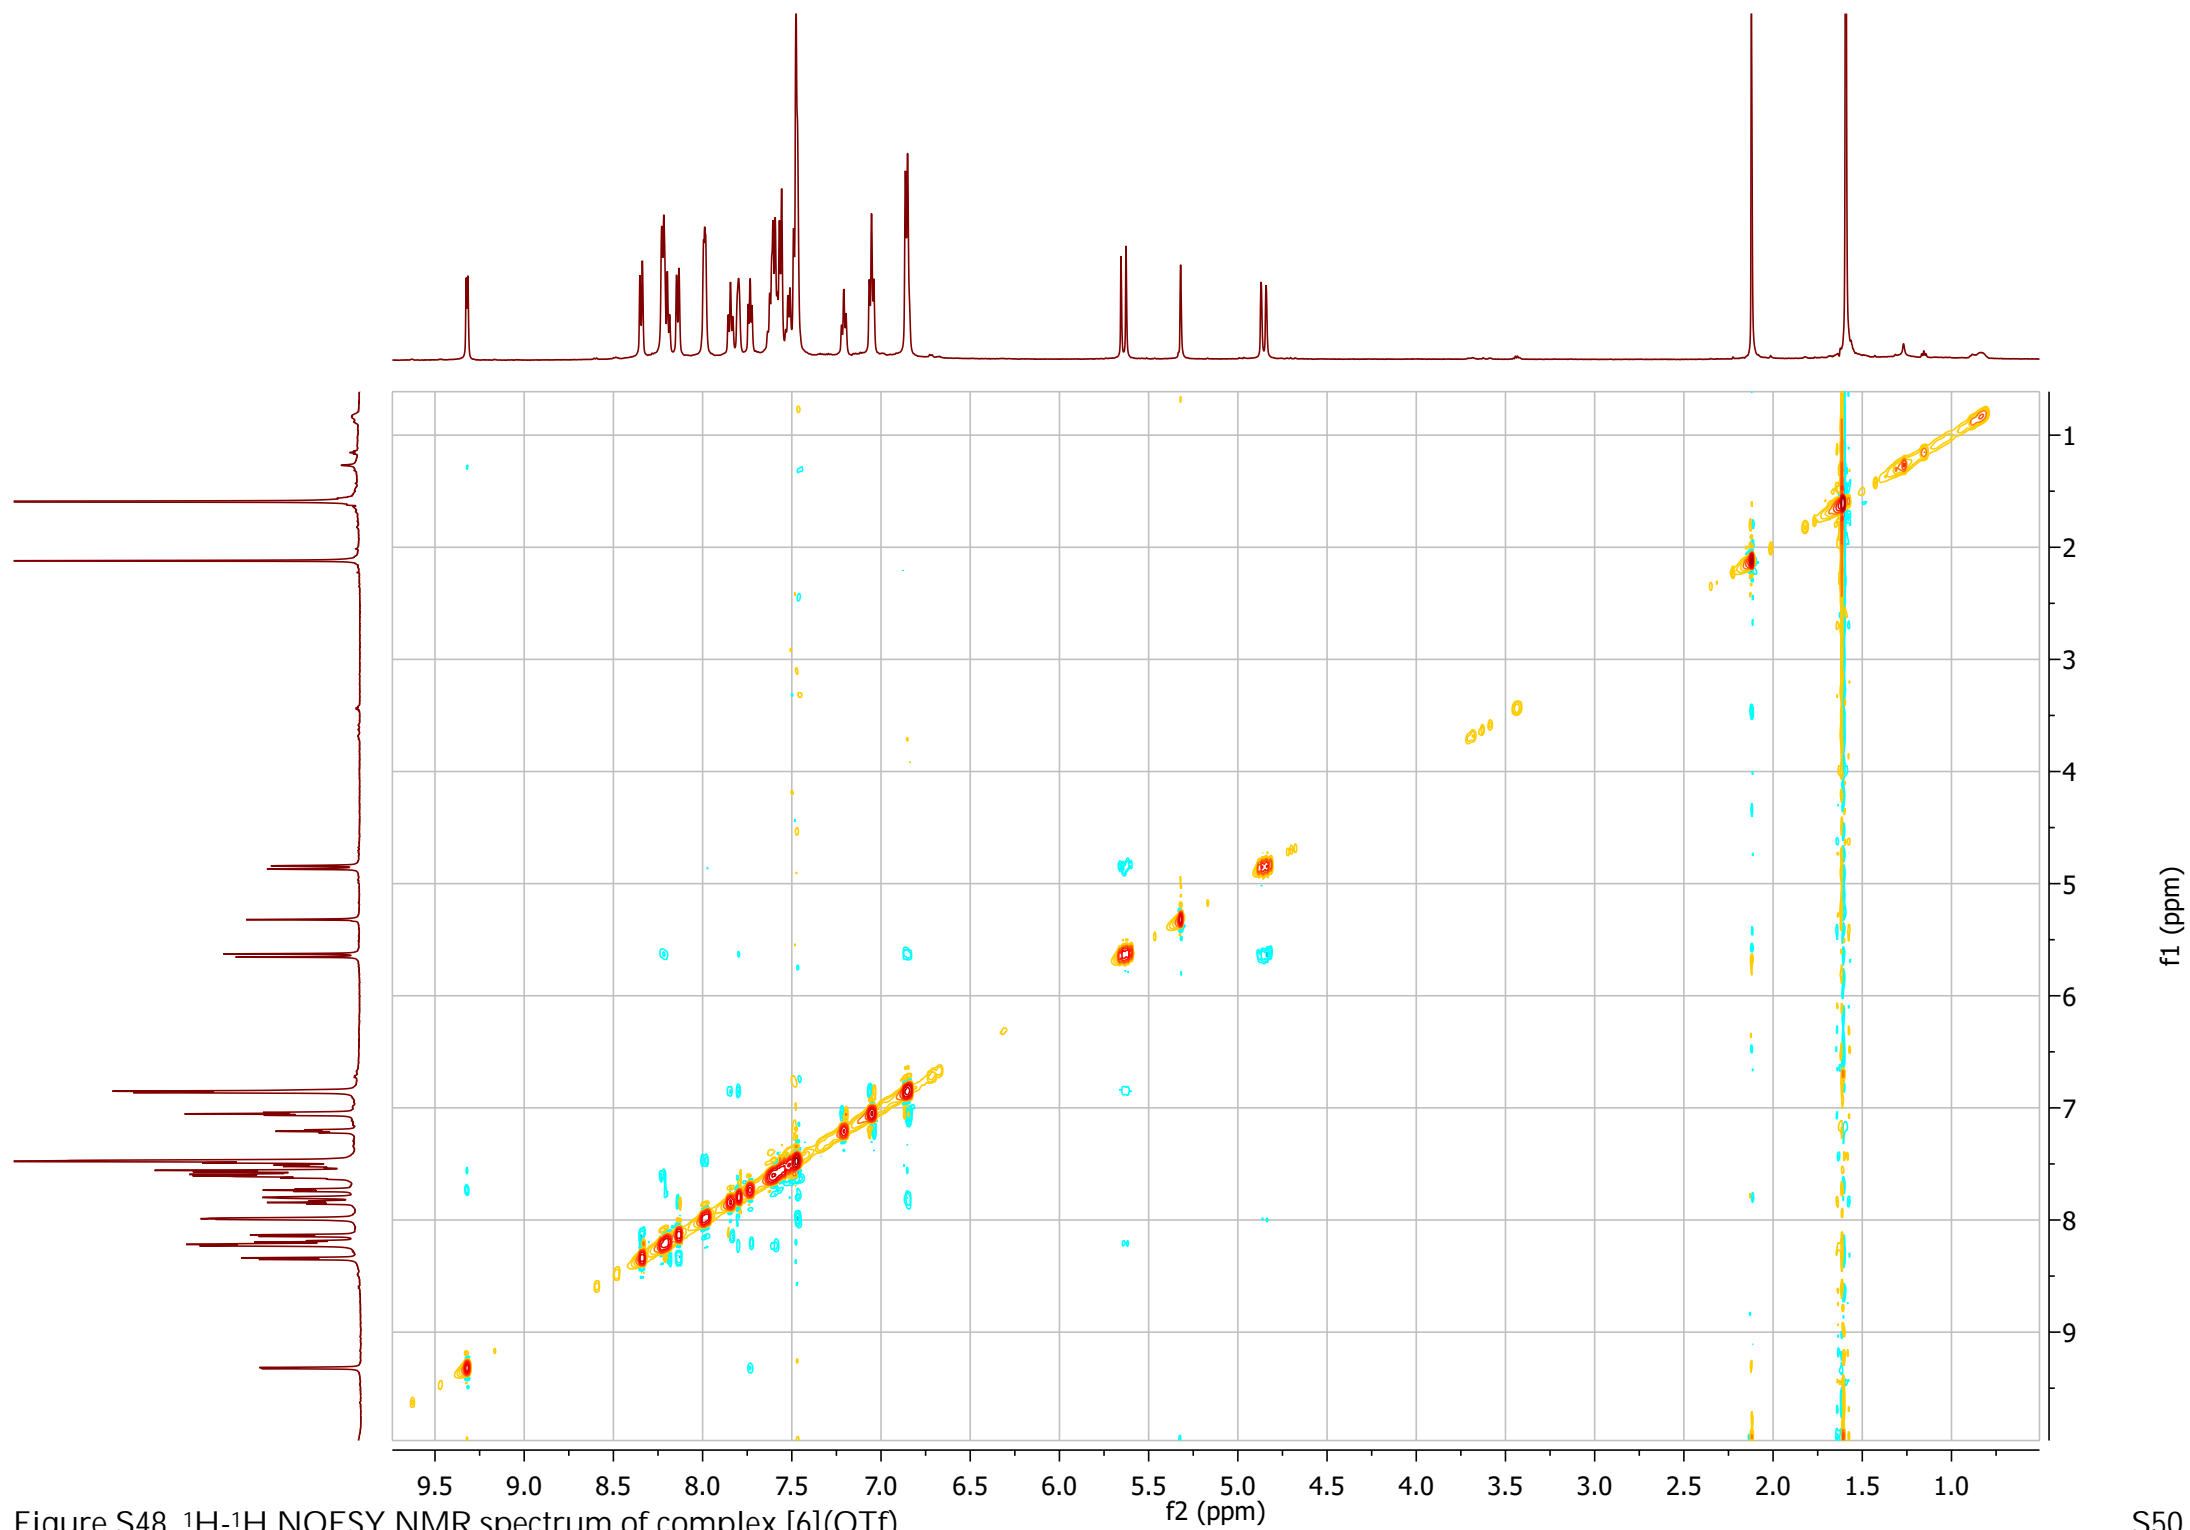

Figure S48.  $^1\text{H}$ - $^1\text{H}$  NOESY NMR spectrum of complex  $[6](\text{OTf})$ .

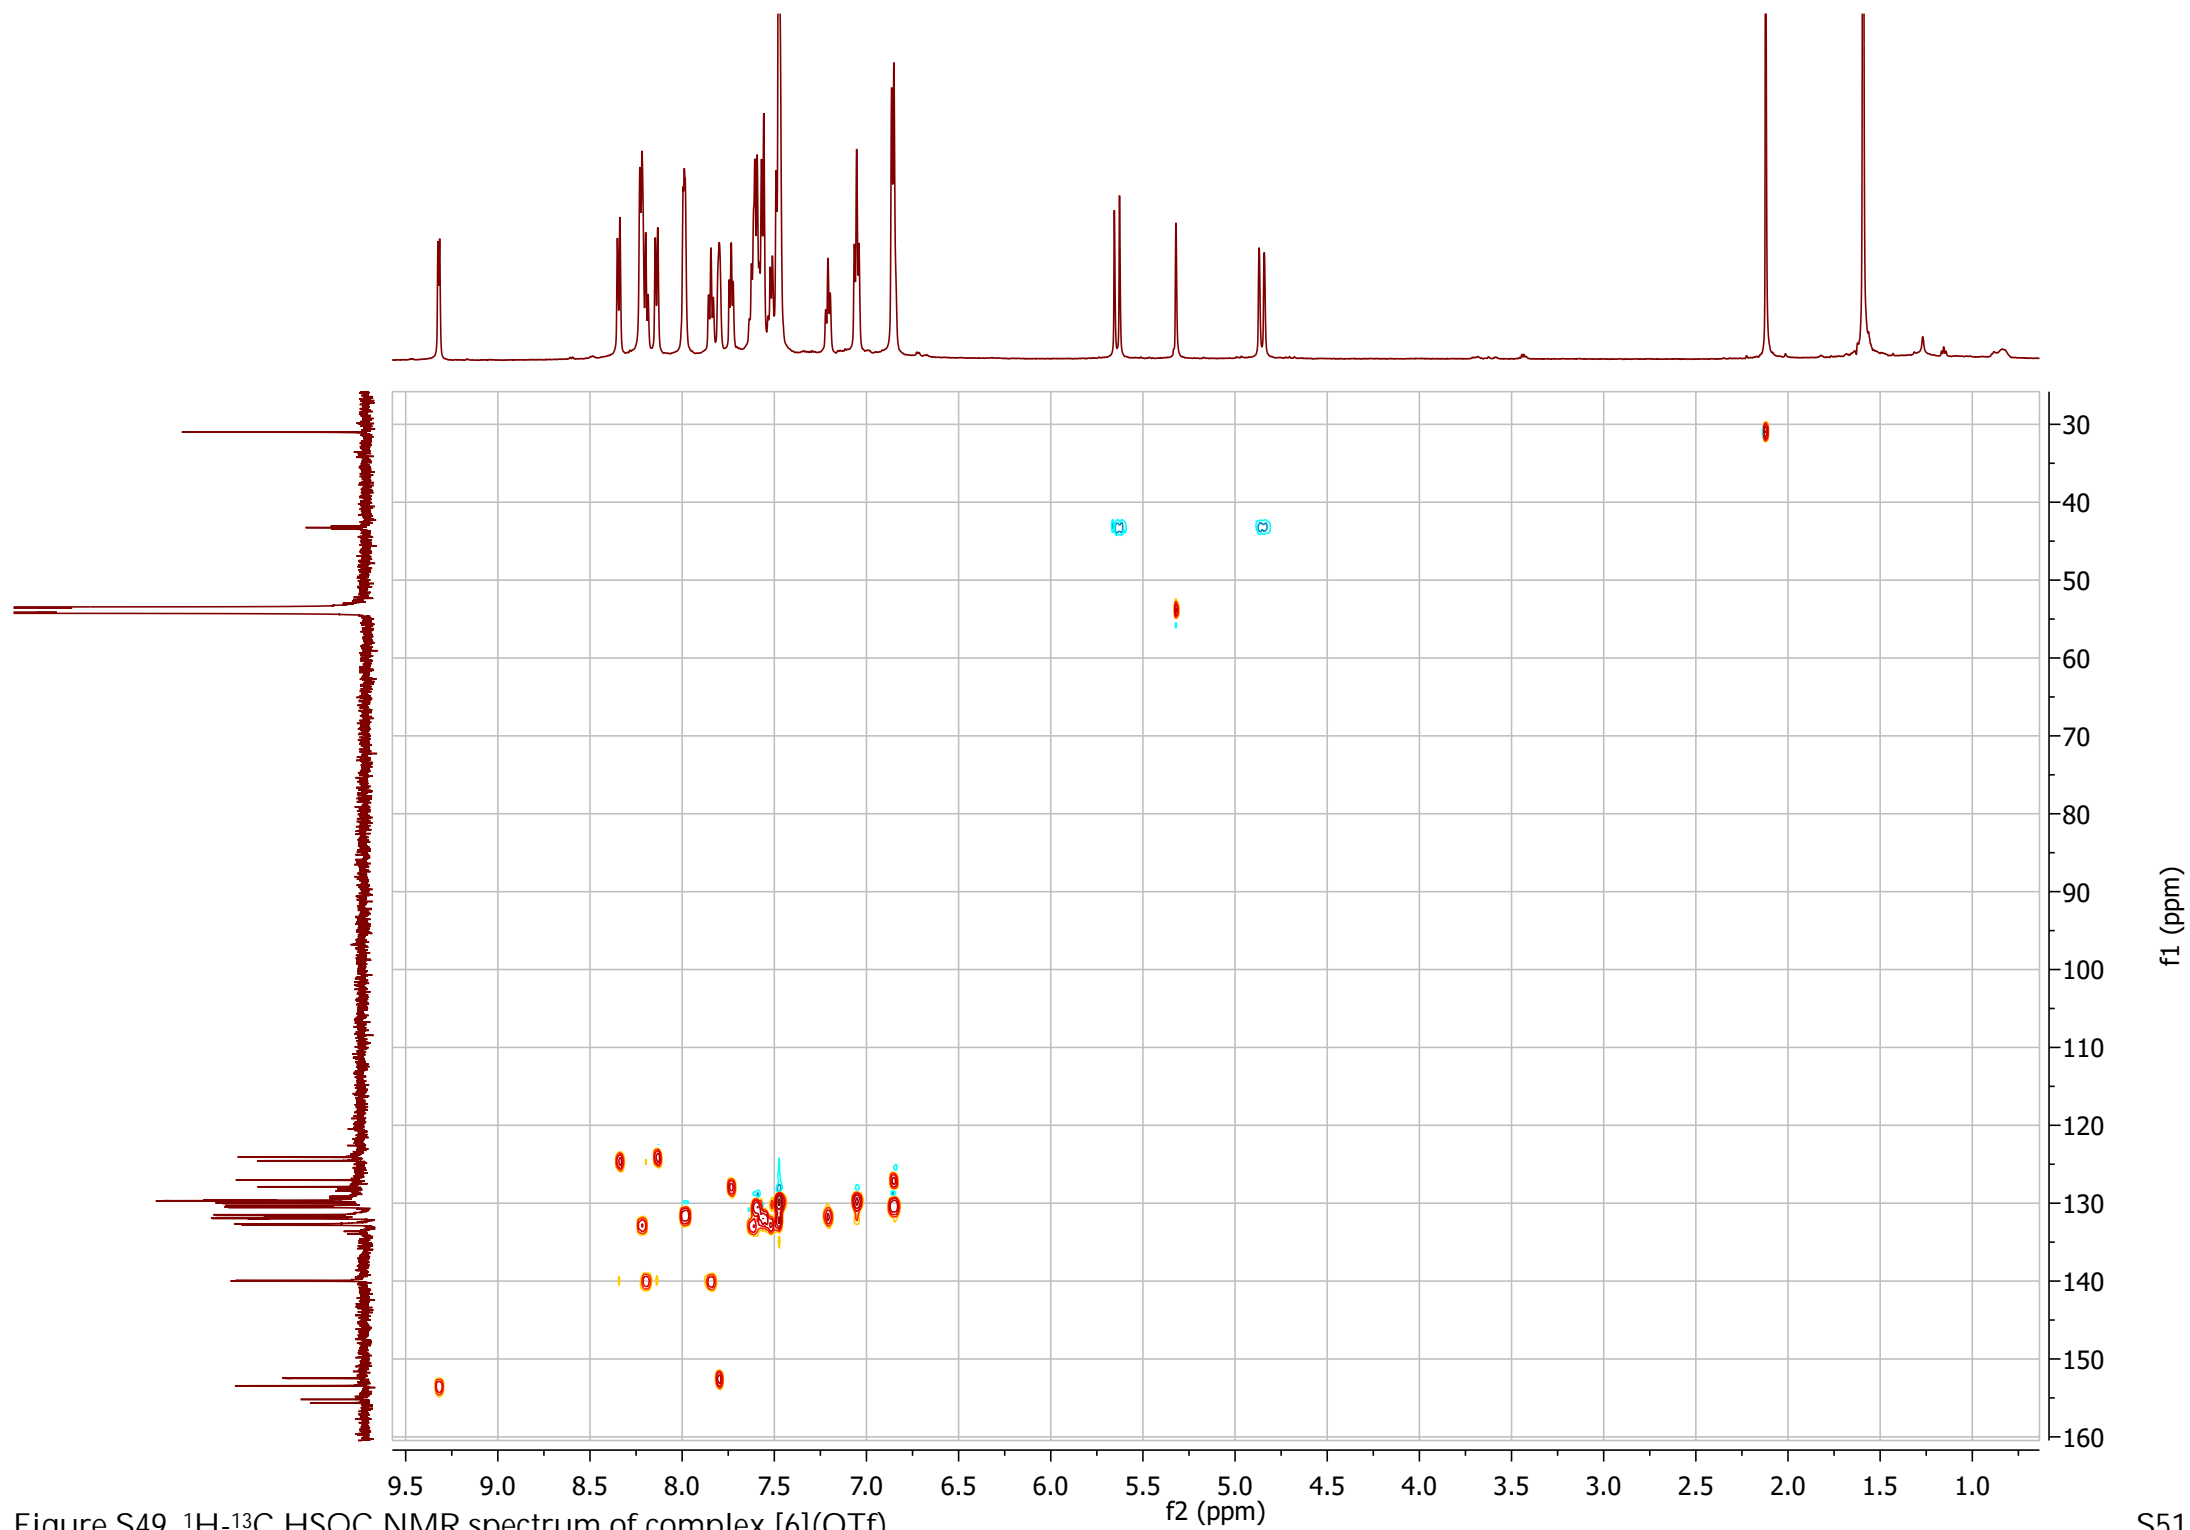

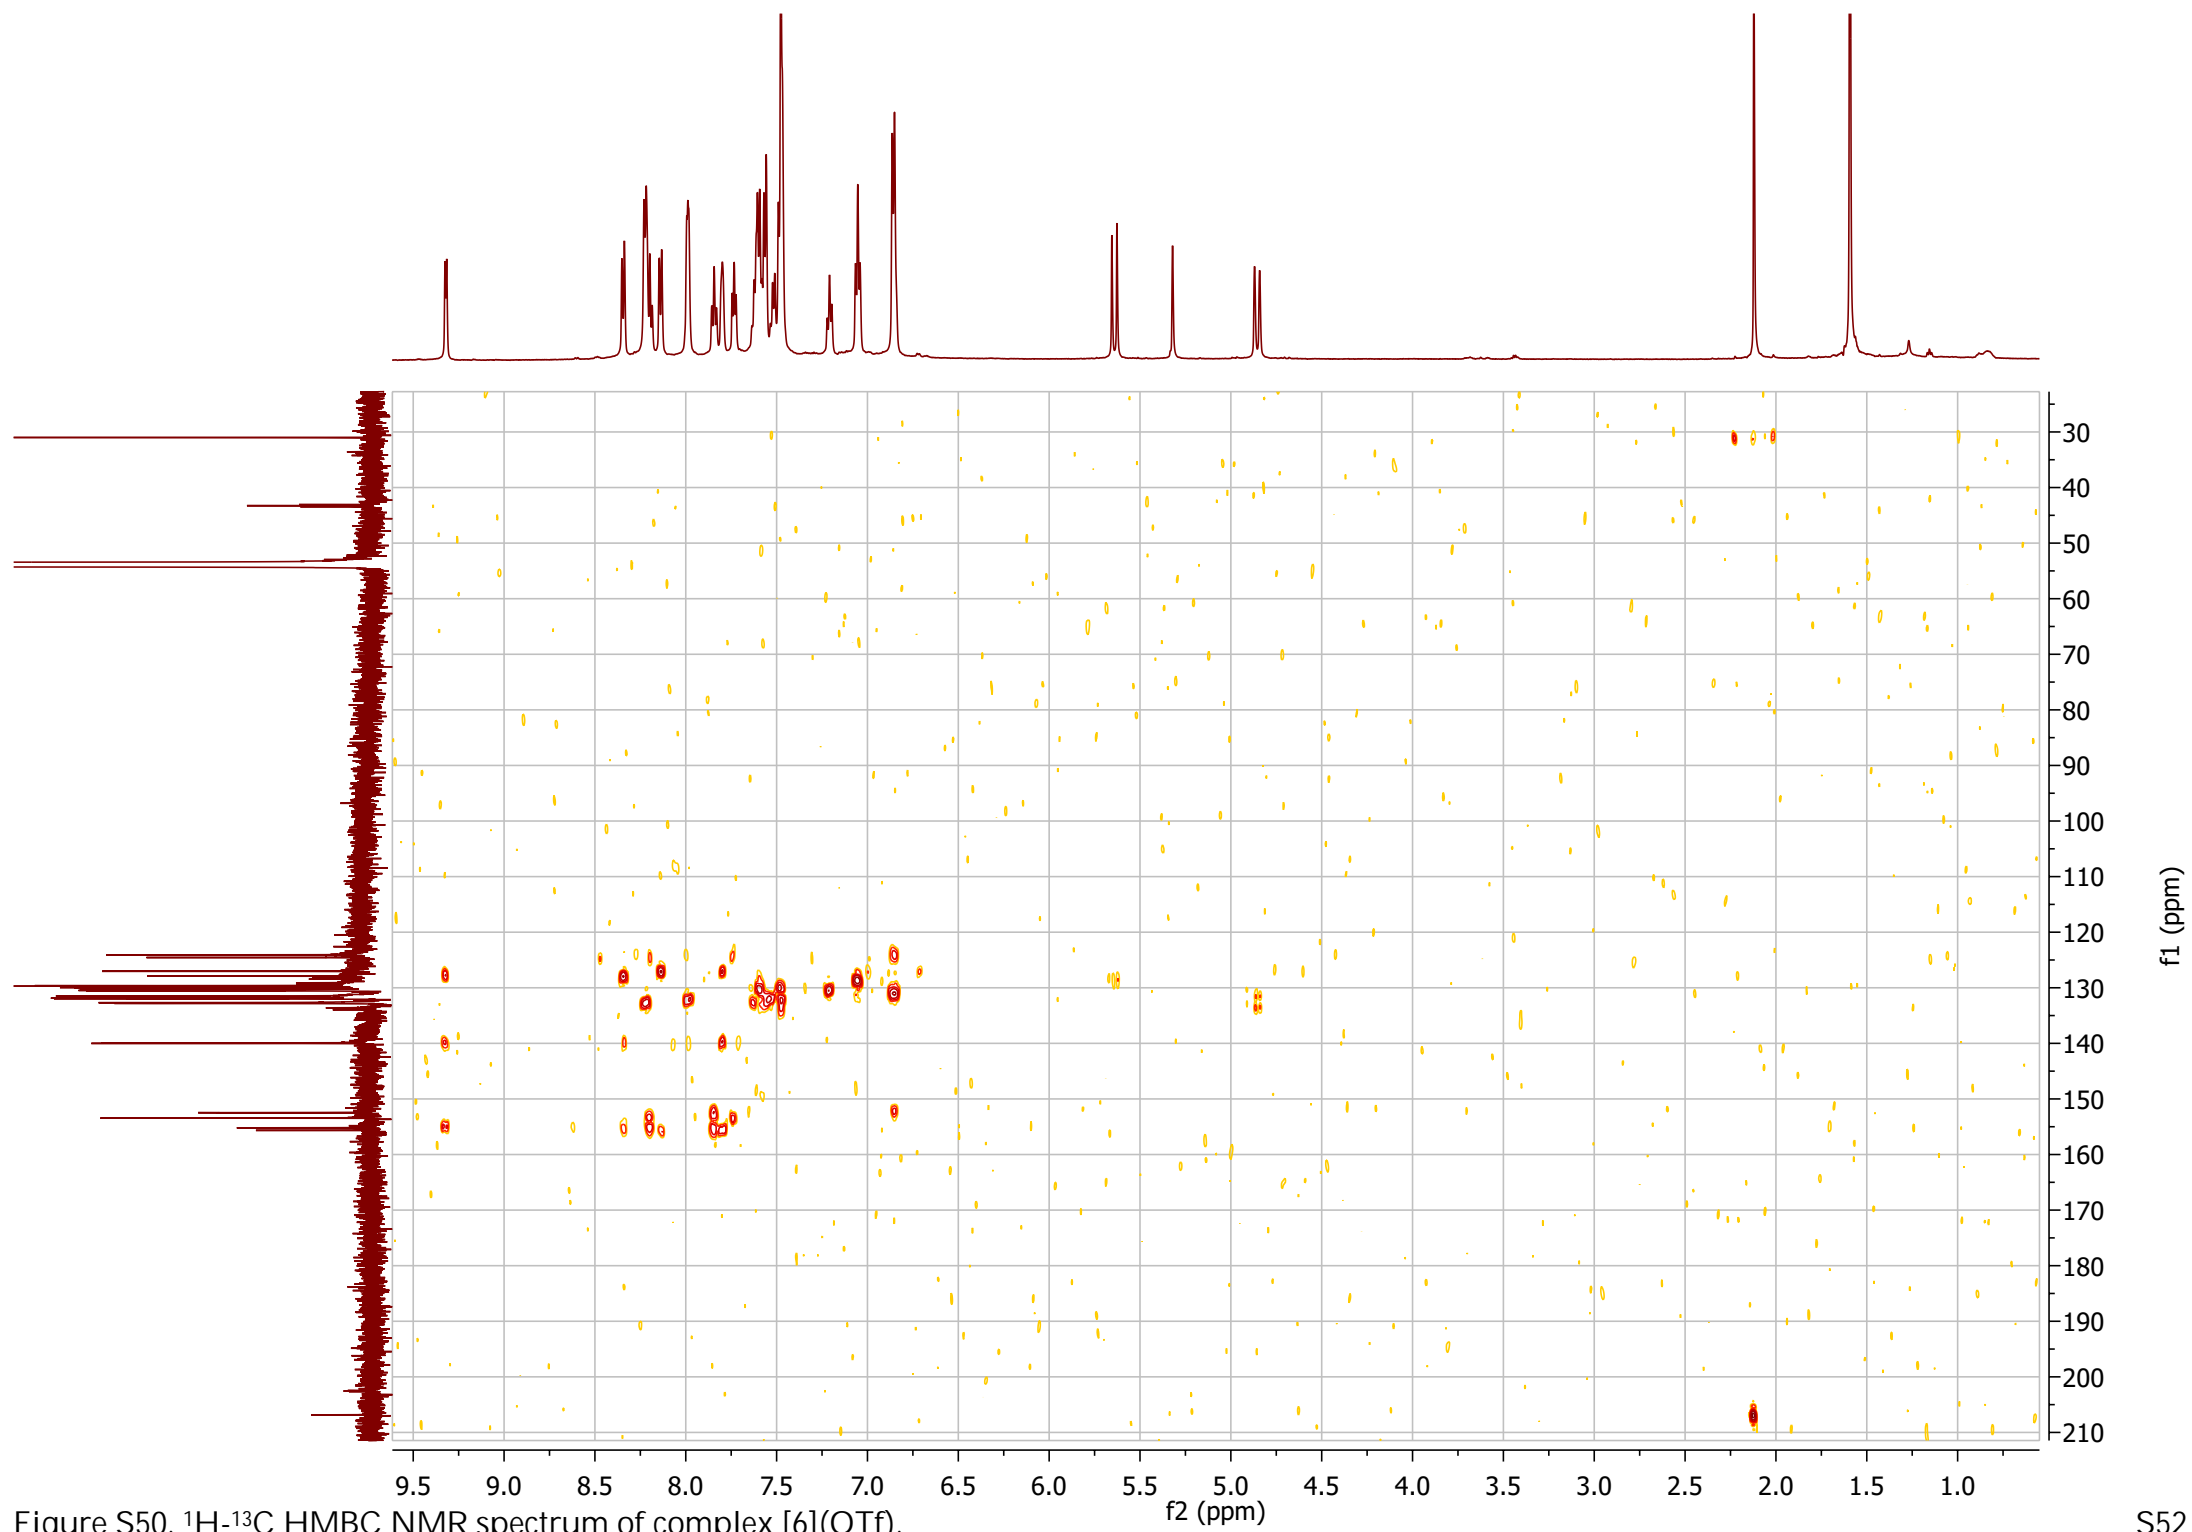



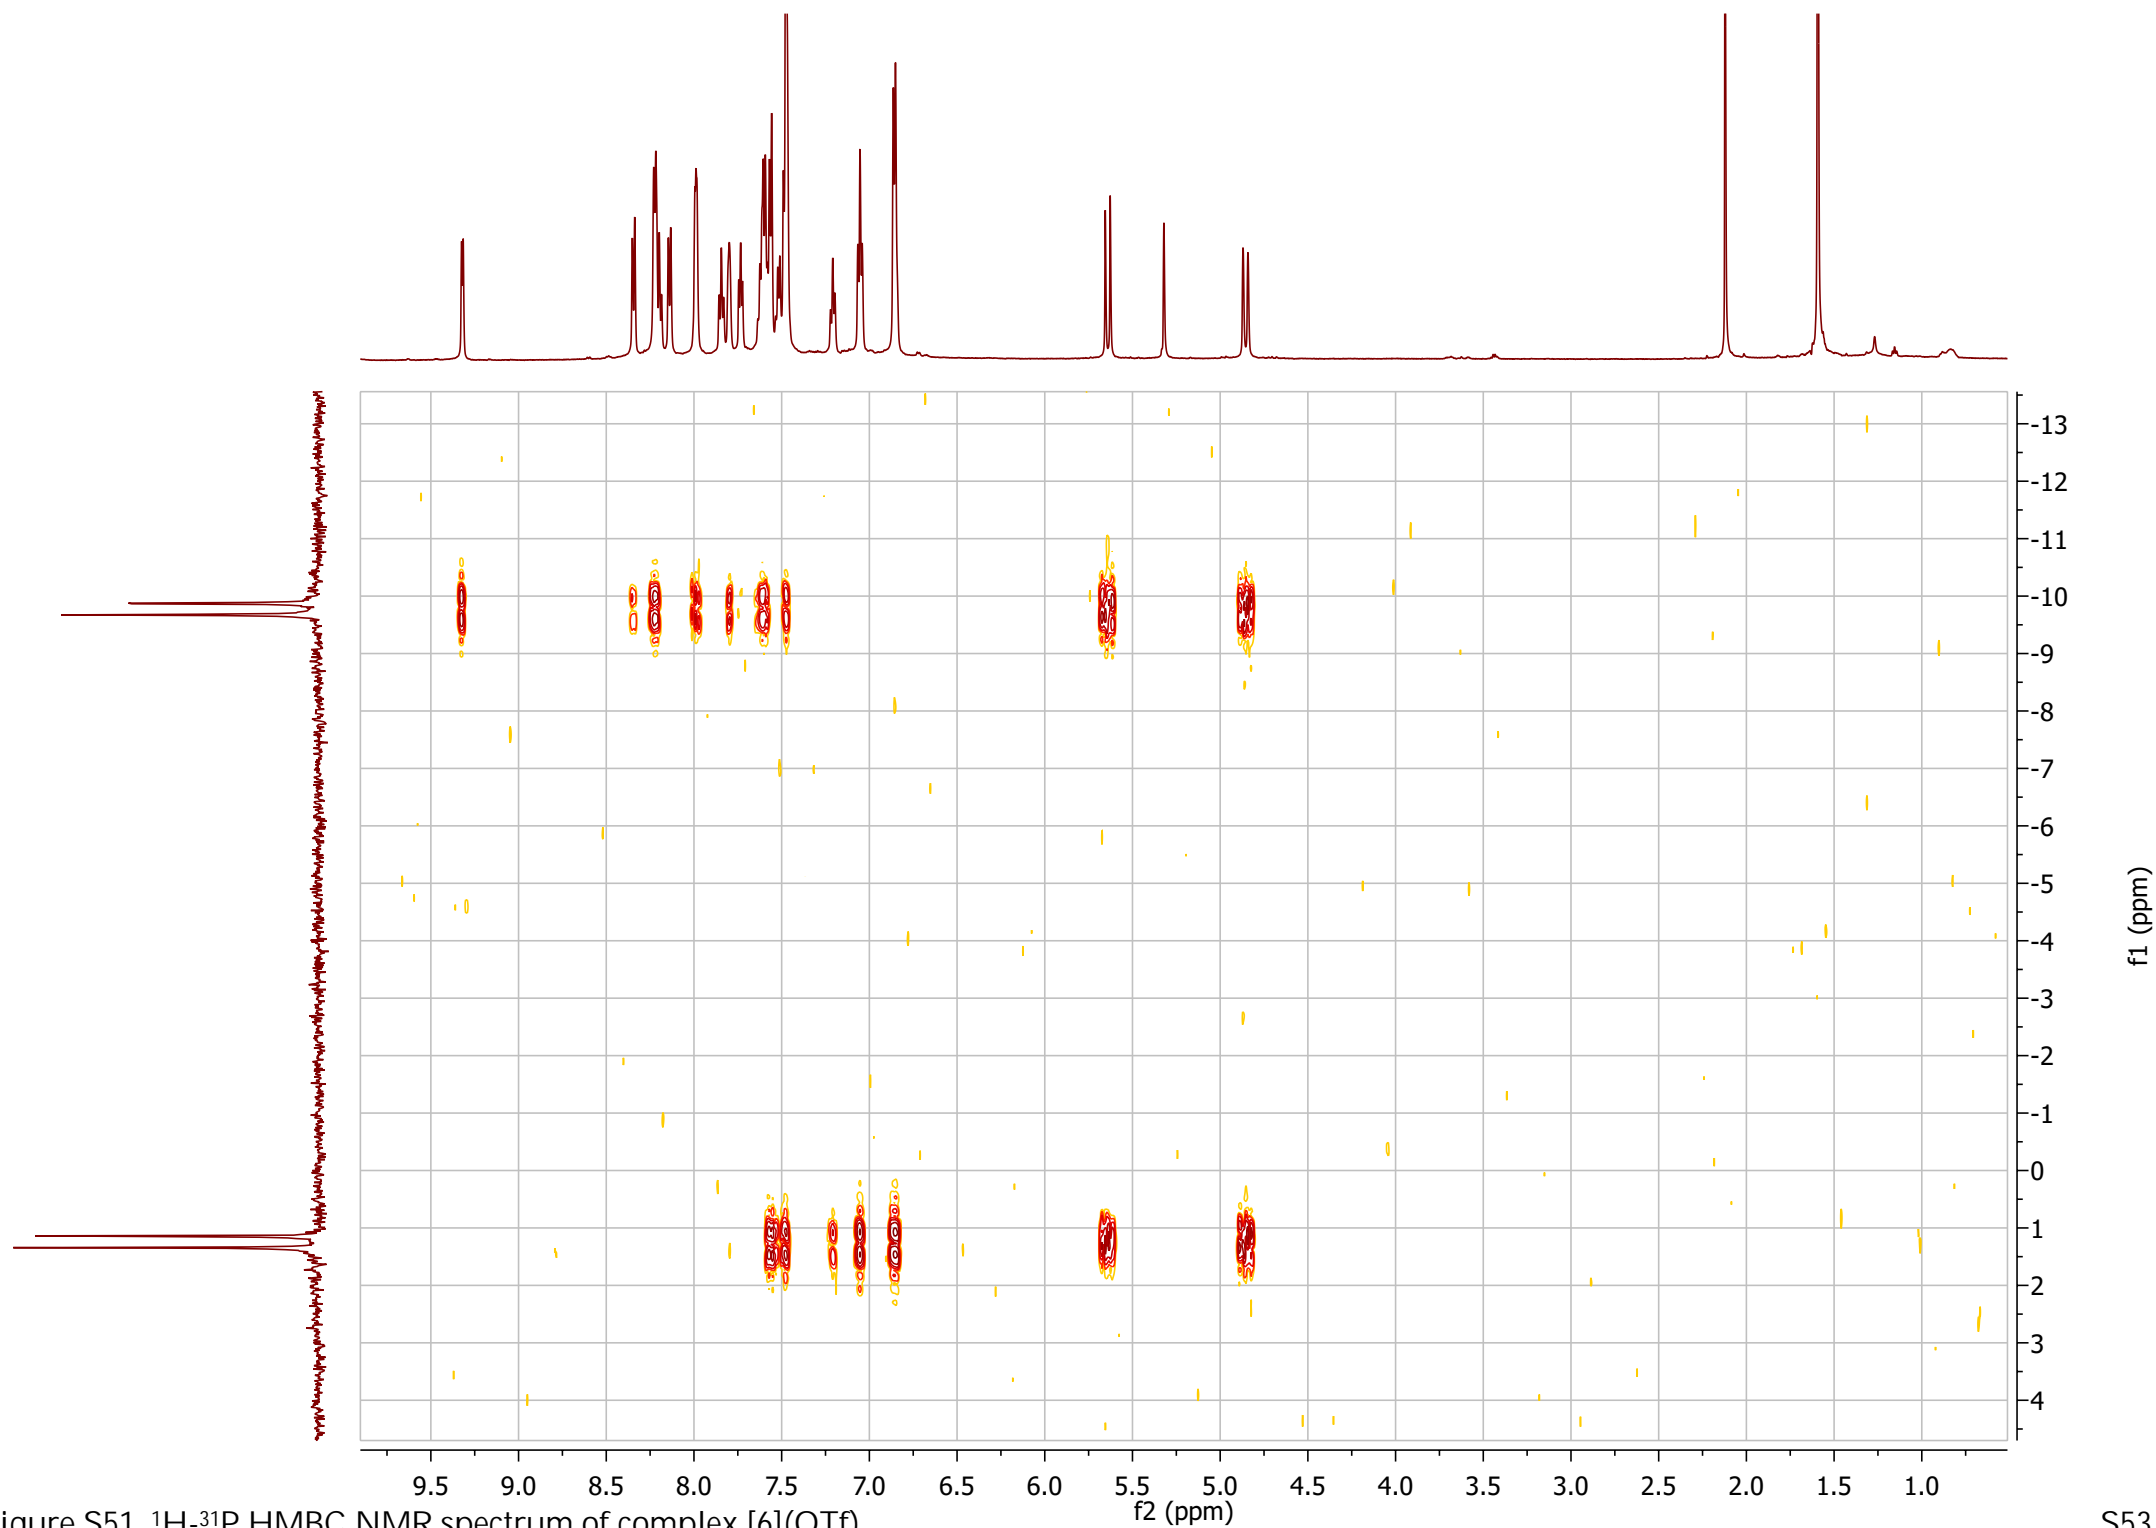

Figure S51.  $^1\text{H}$ - $^{31}\text{P}$  HMBC NMR spectrum of complex  $[6](\text{OTf})$ .

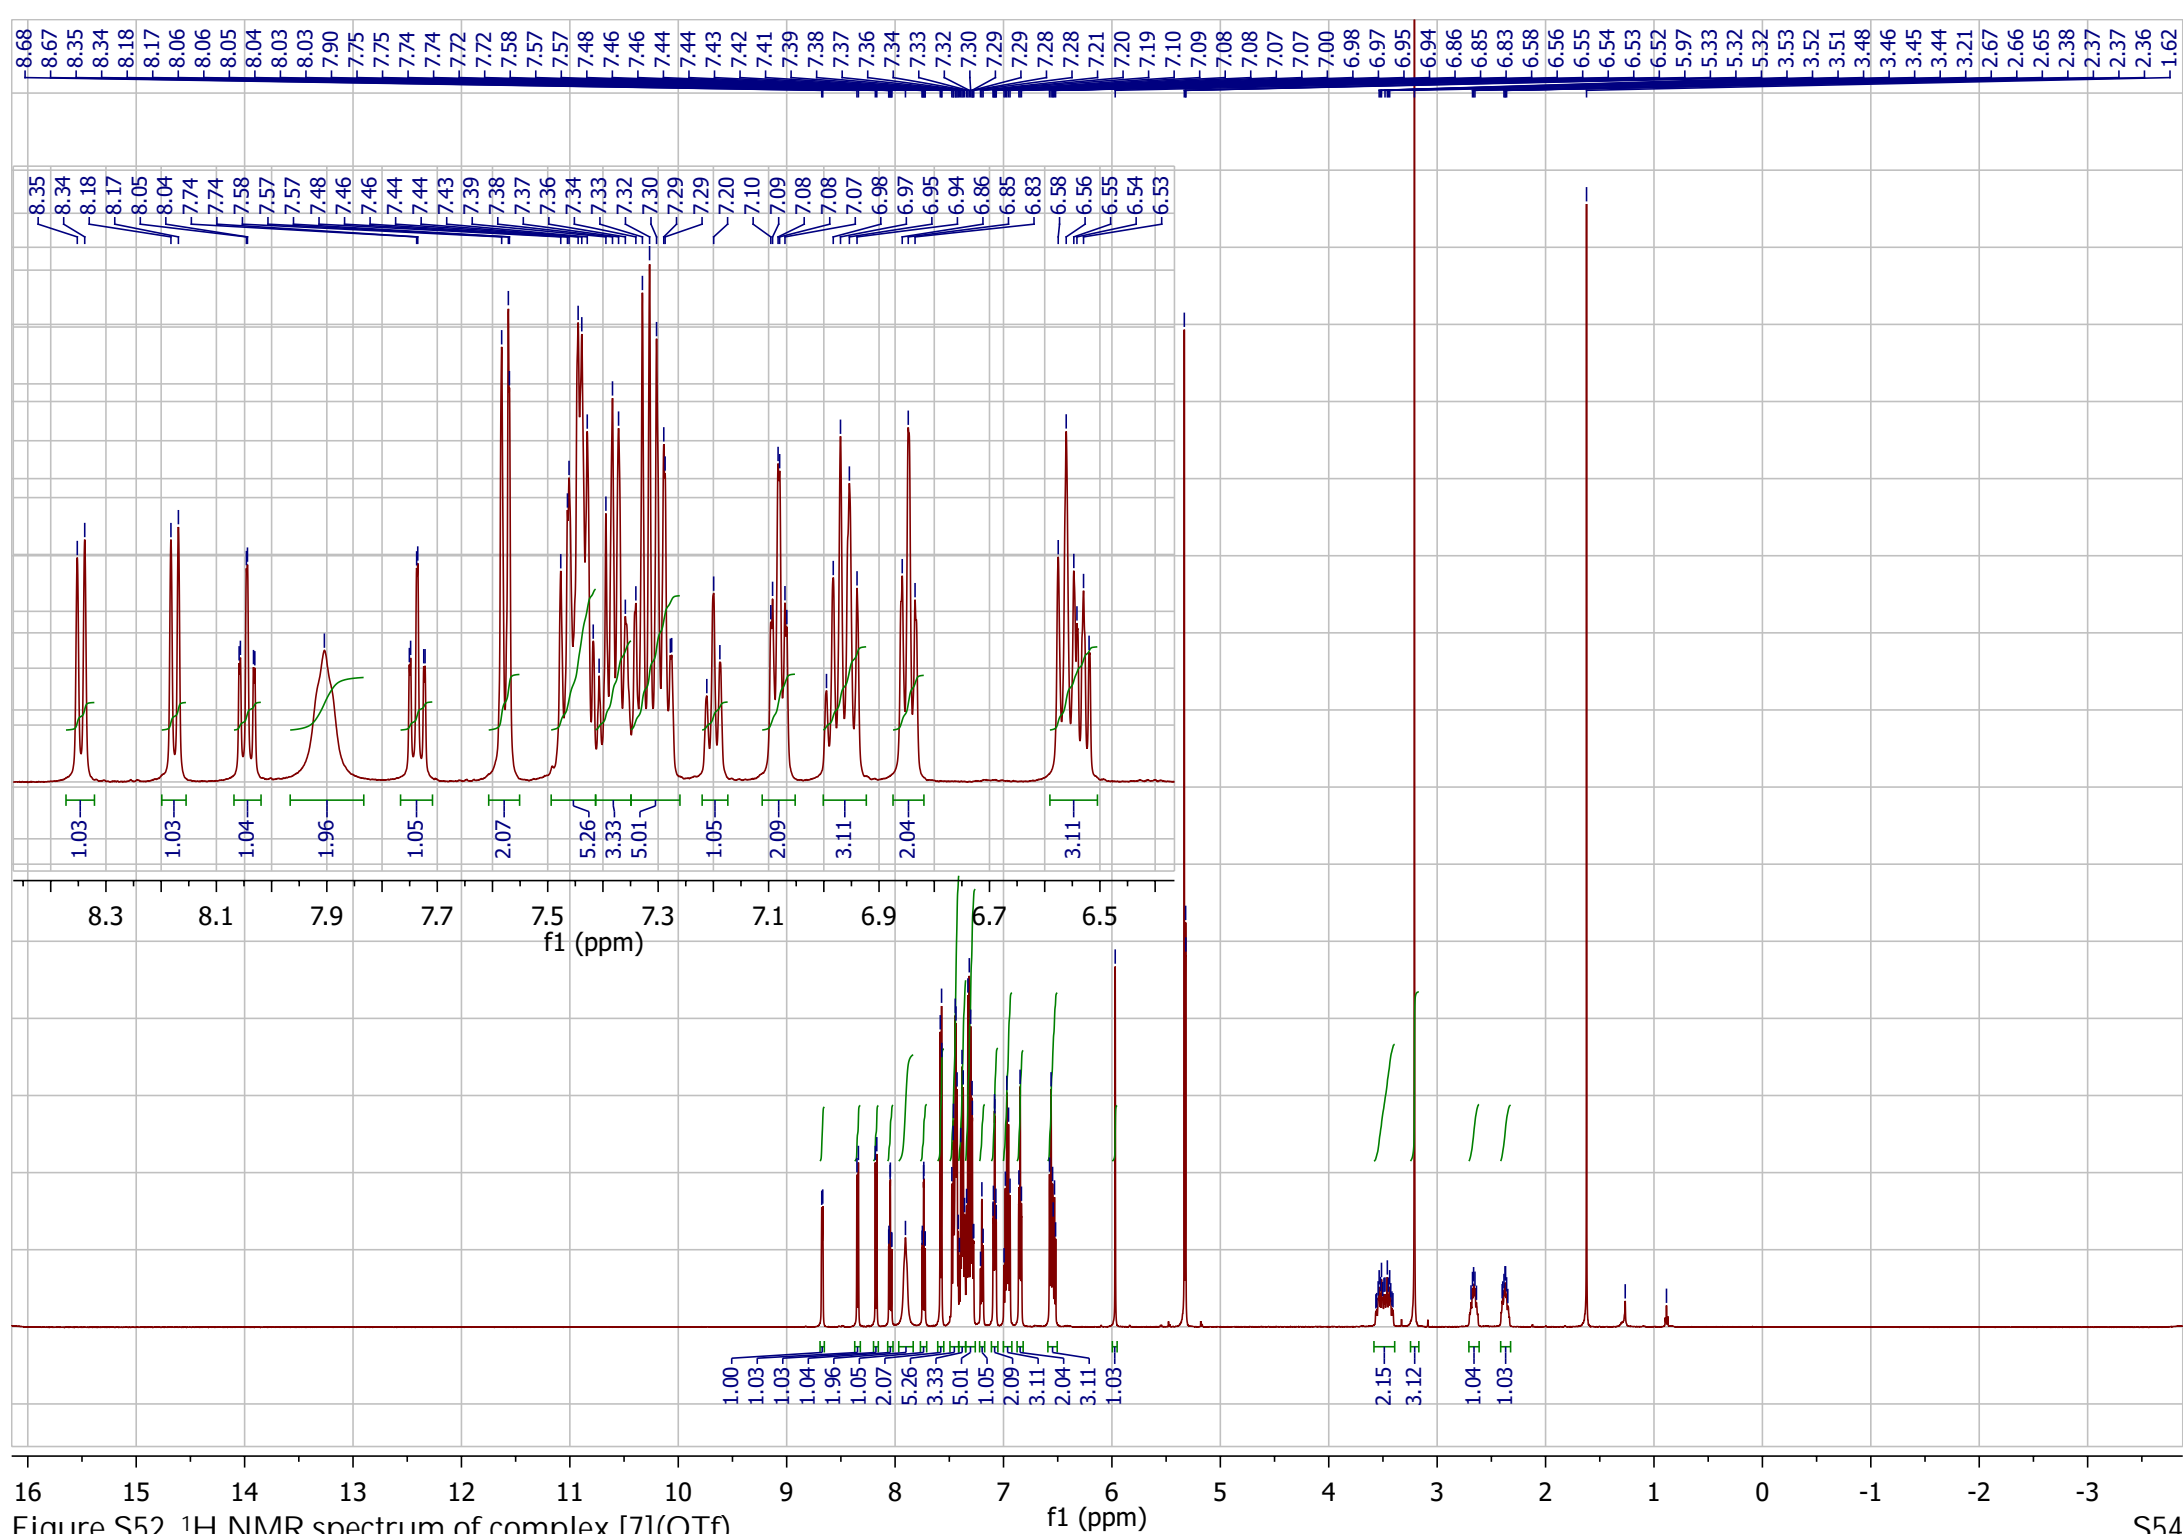

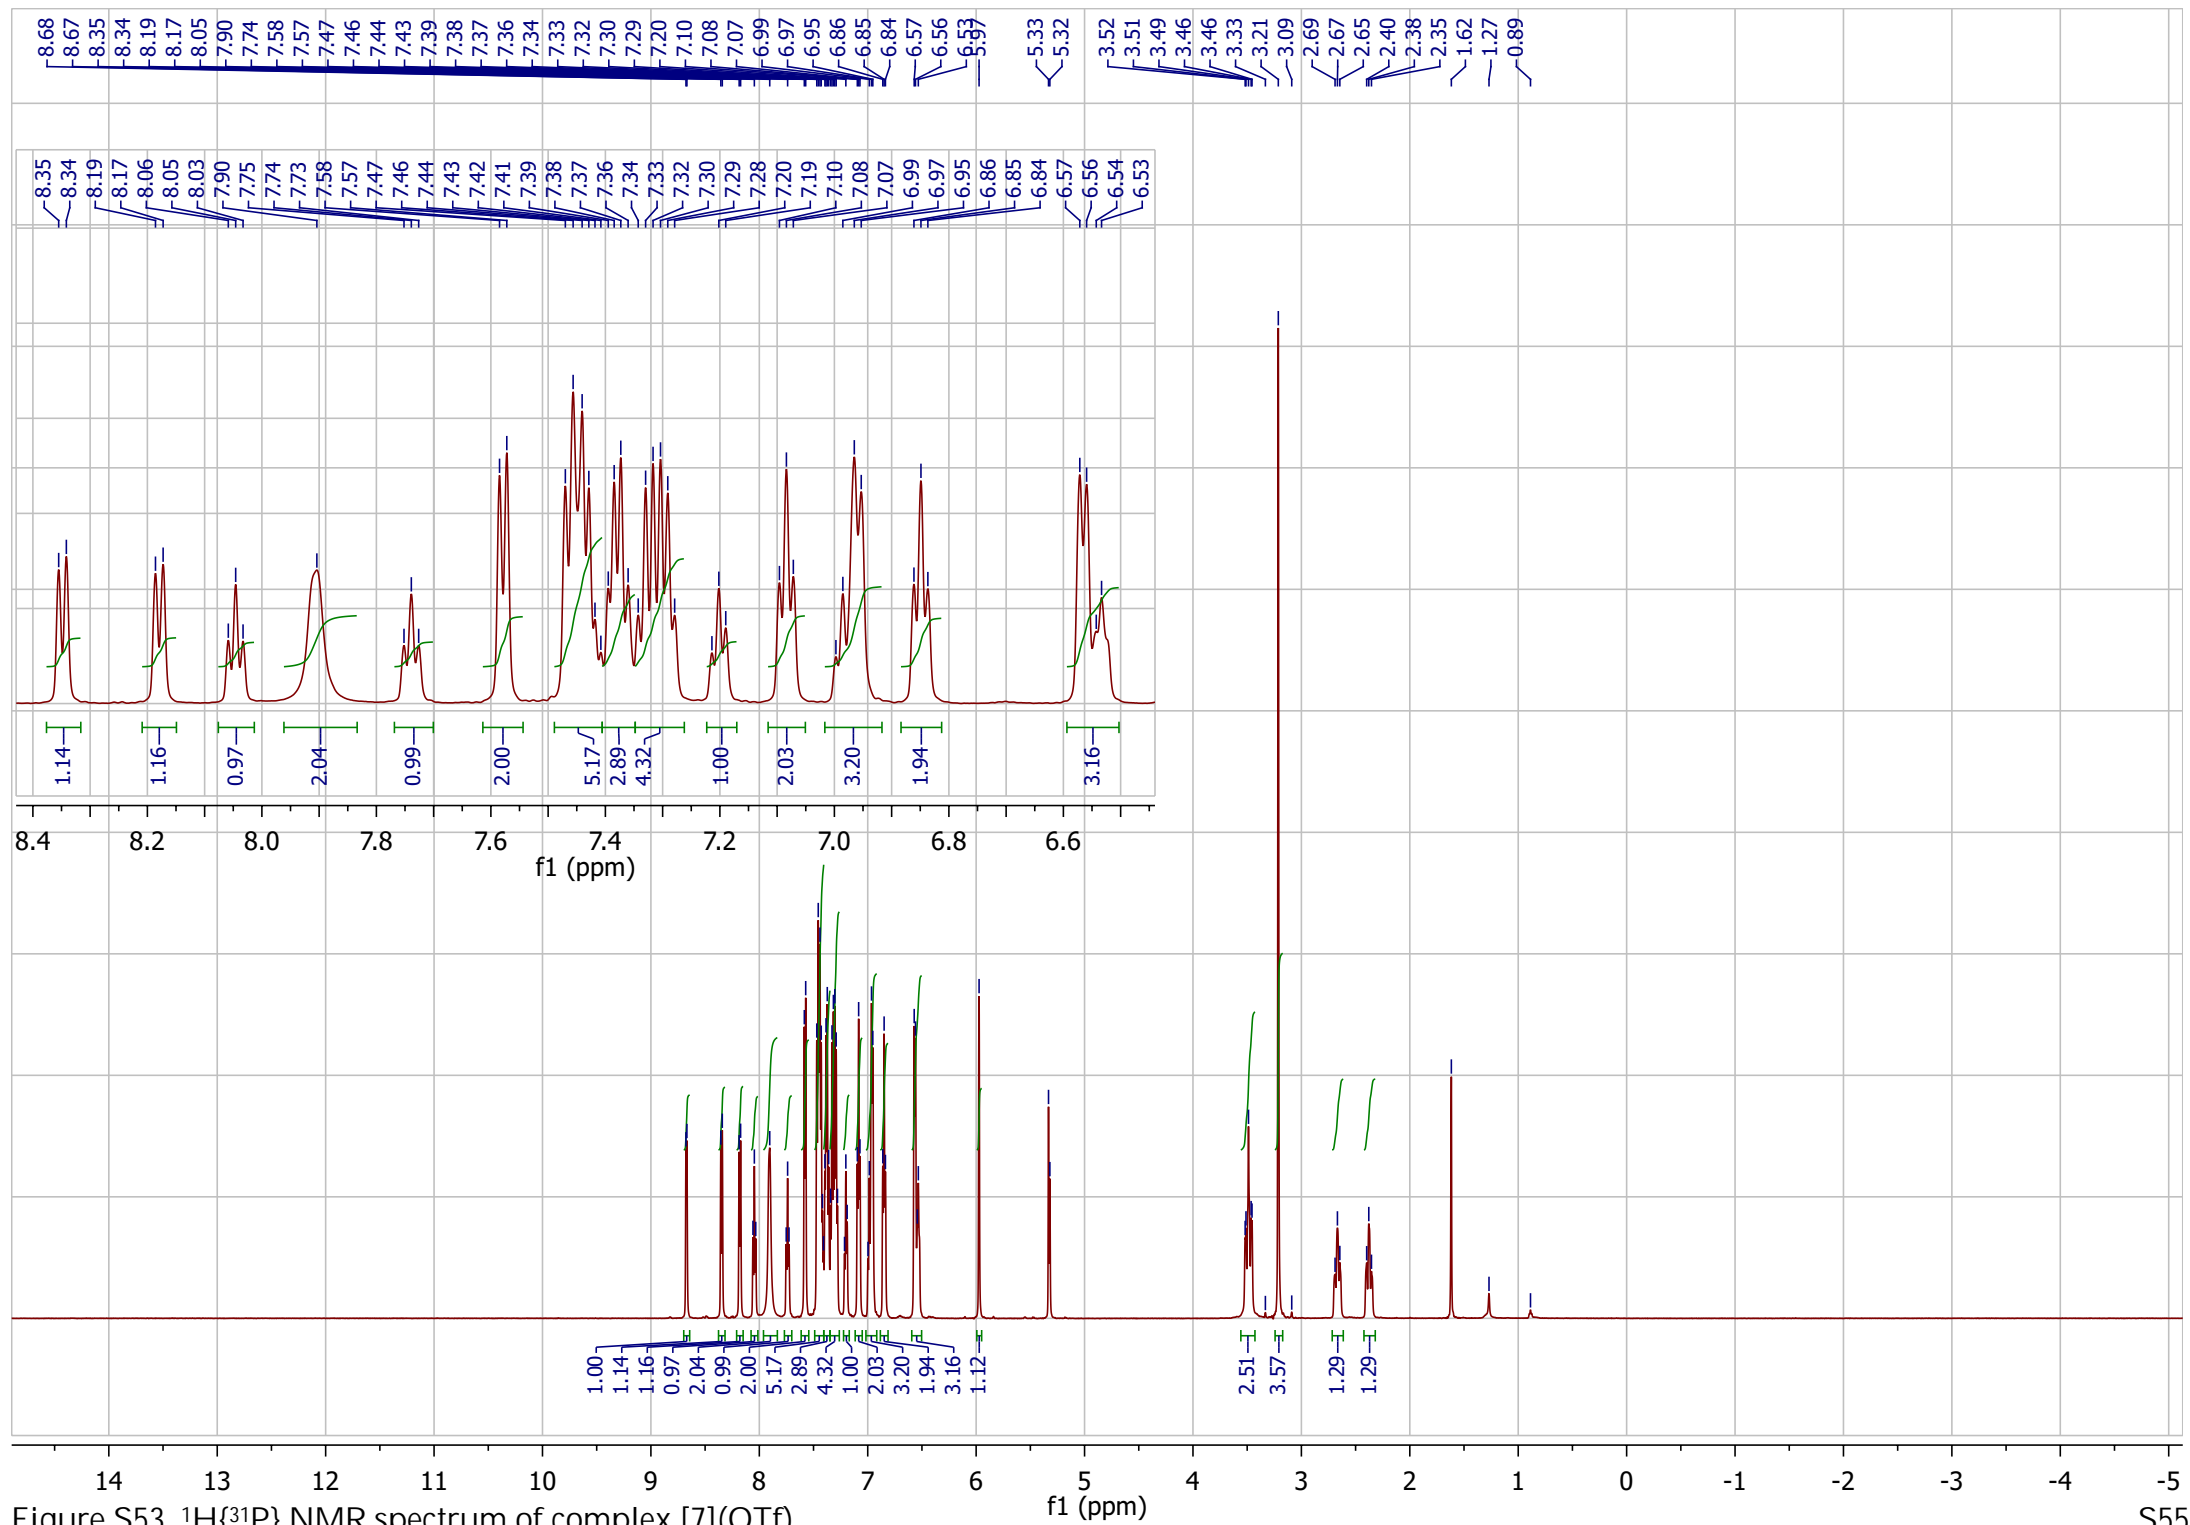

Figure S53.  $^1\text{H}\{^{31}\text{P}\}$  NMR spectrum of complex [7](OTf).

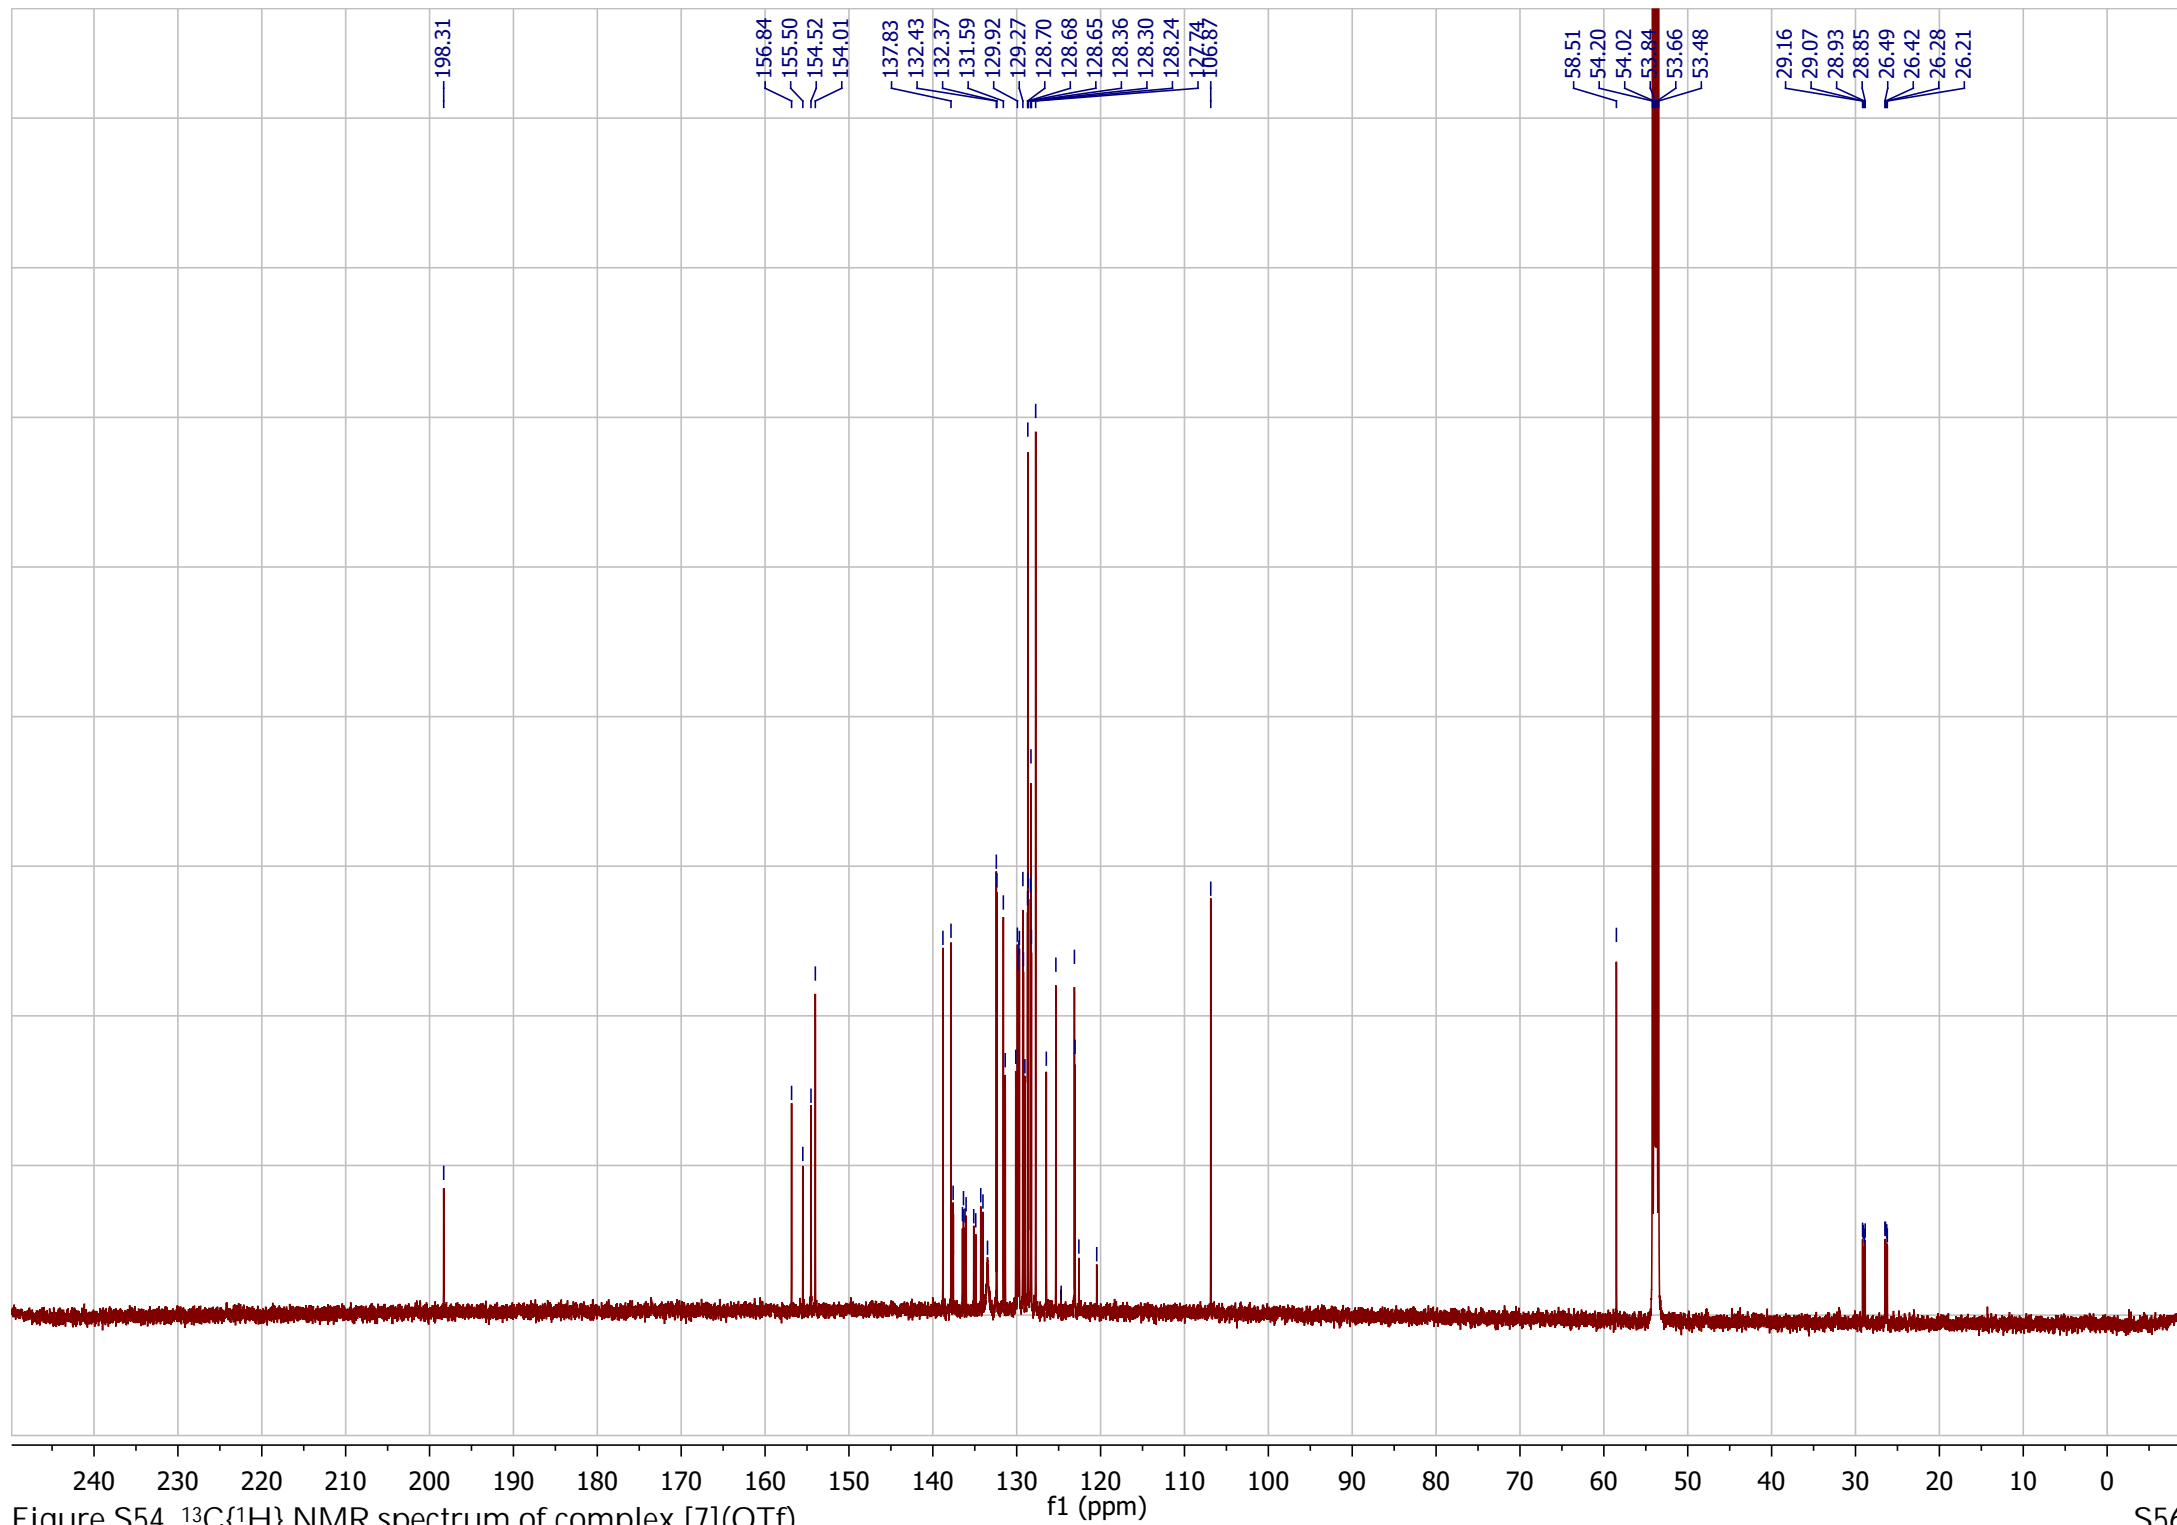

Figure S54.  $^{13}\text{C}\{^1\text{H}\}$  NMR spectrum of complex [7](OTf).

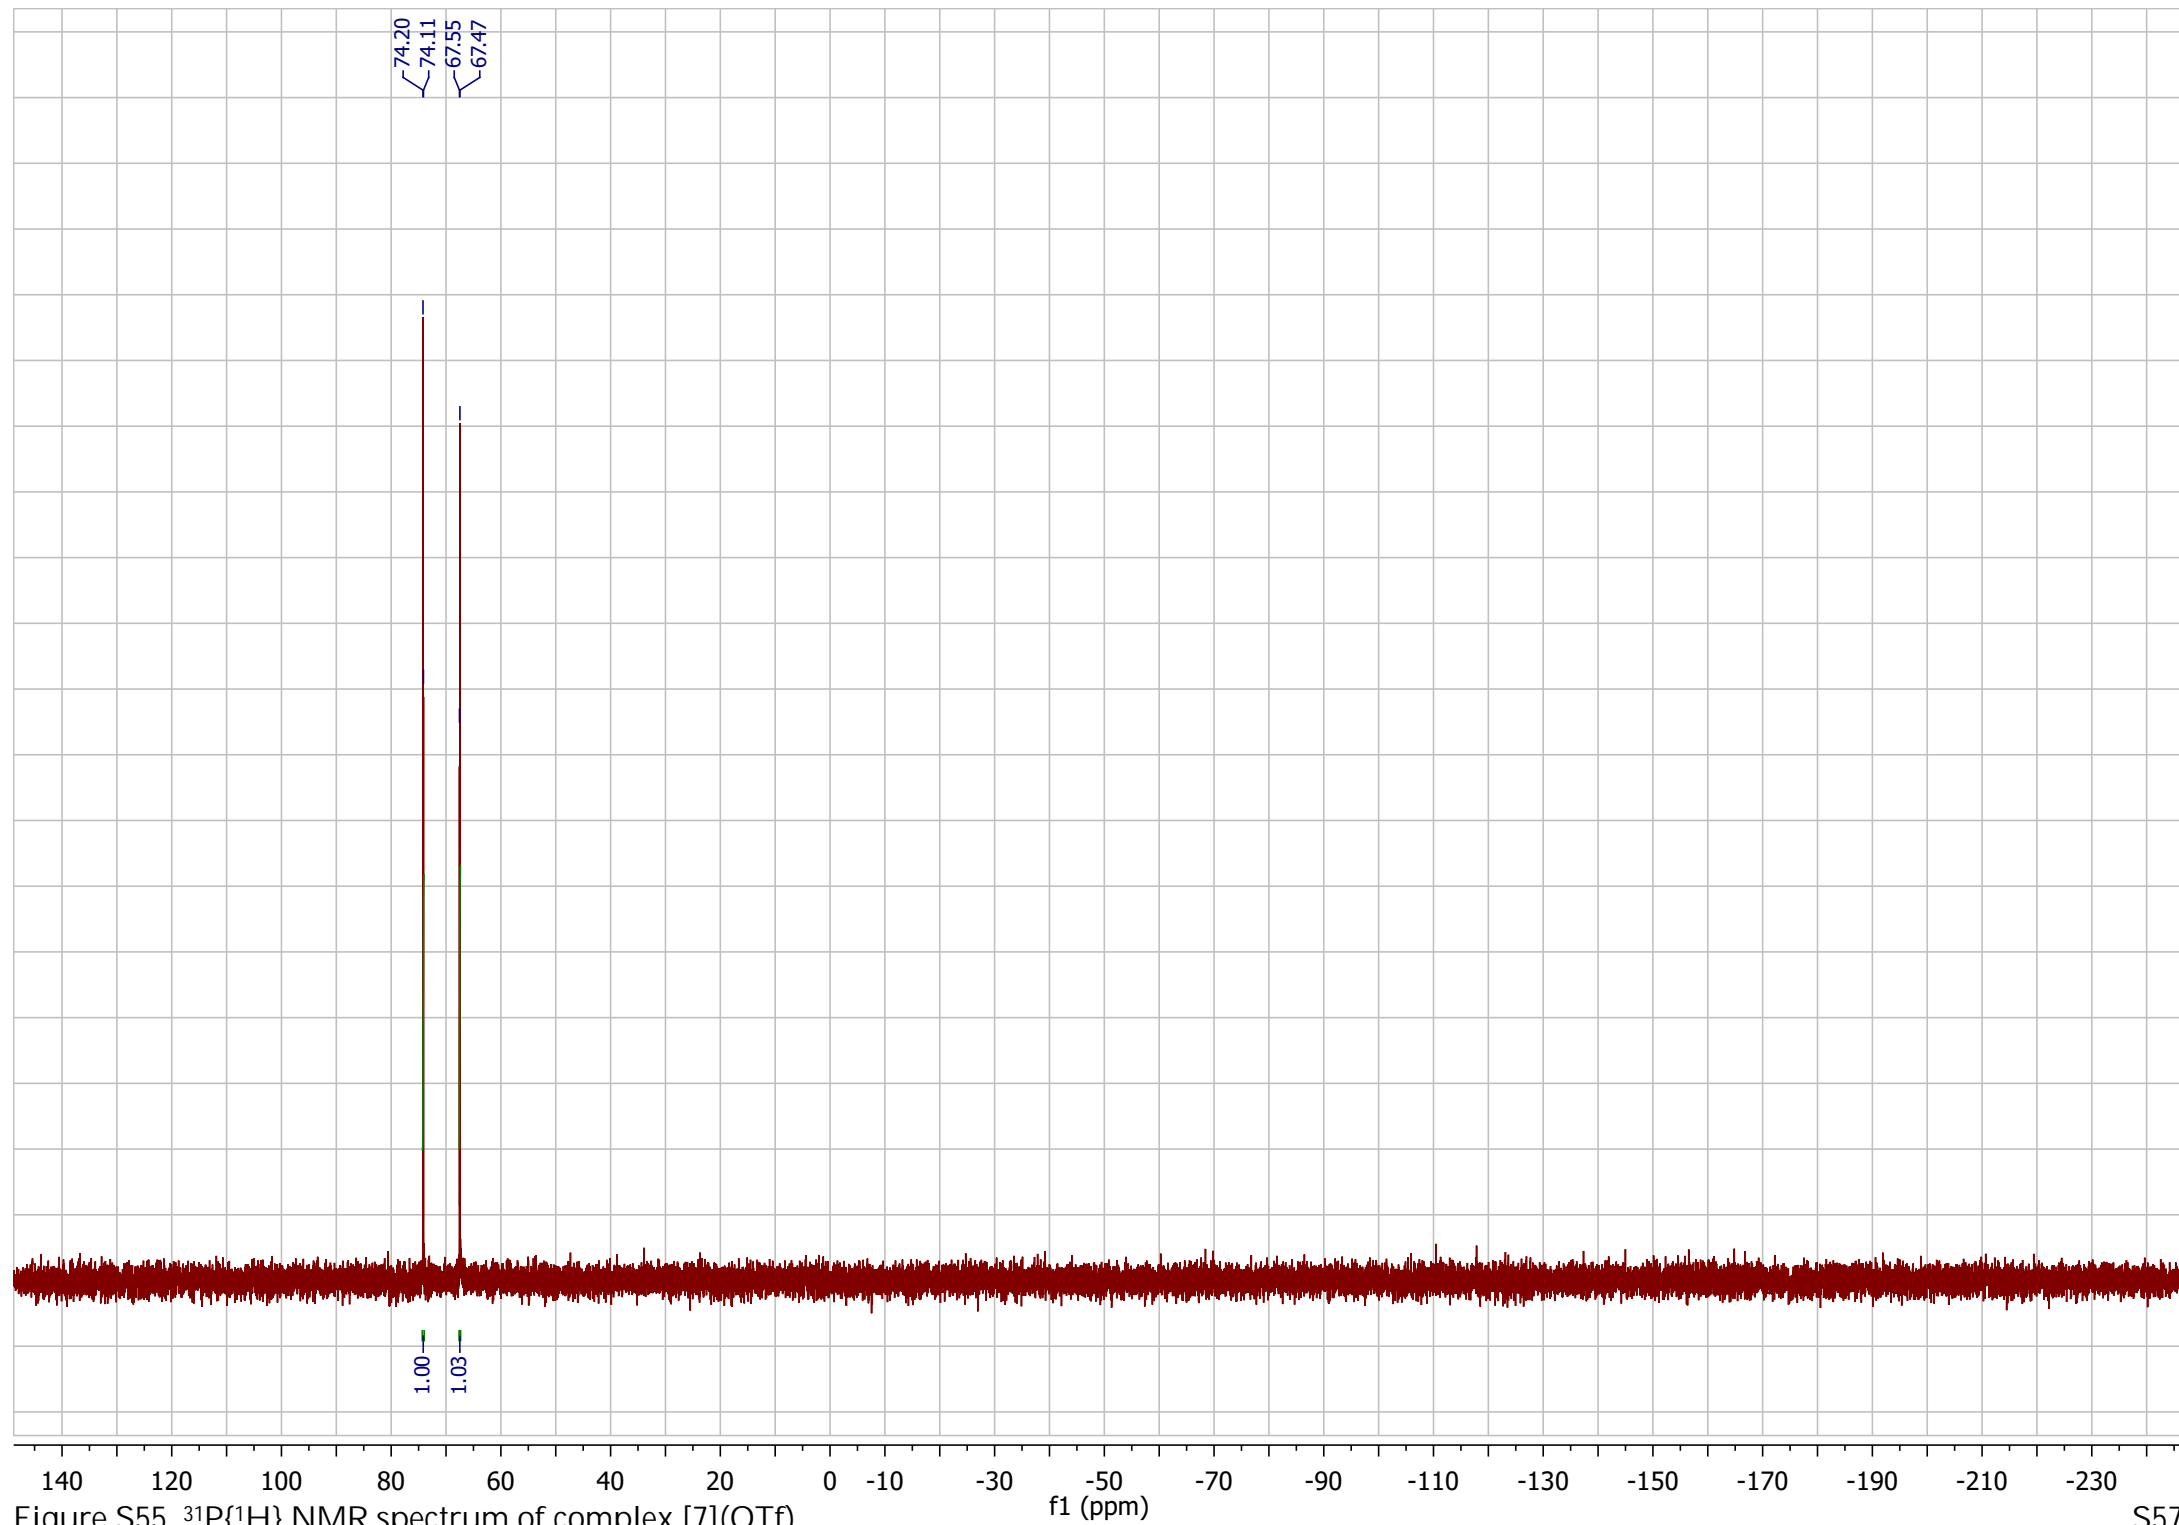

Figure S55.  $^{31}\text{P}\{^1\text{H}\}$  NMR spectrum of complex [7](OTf).

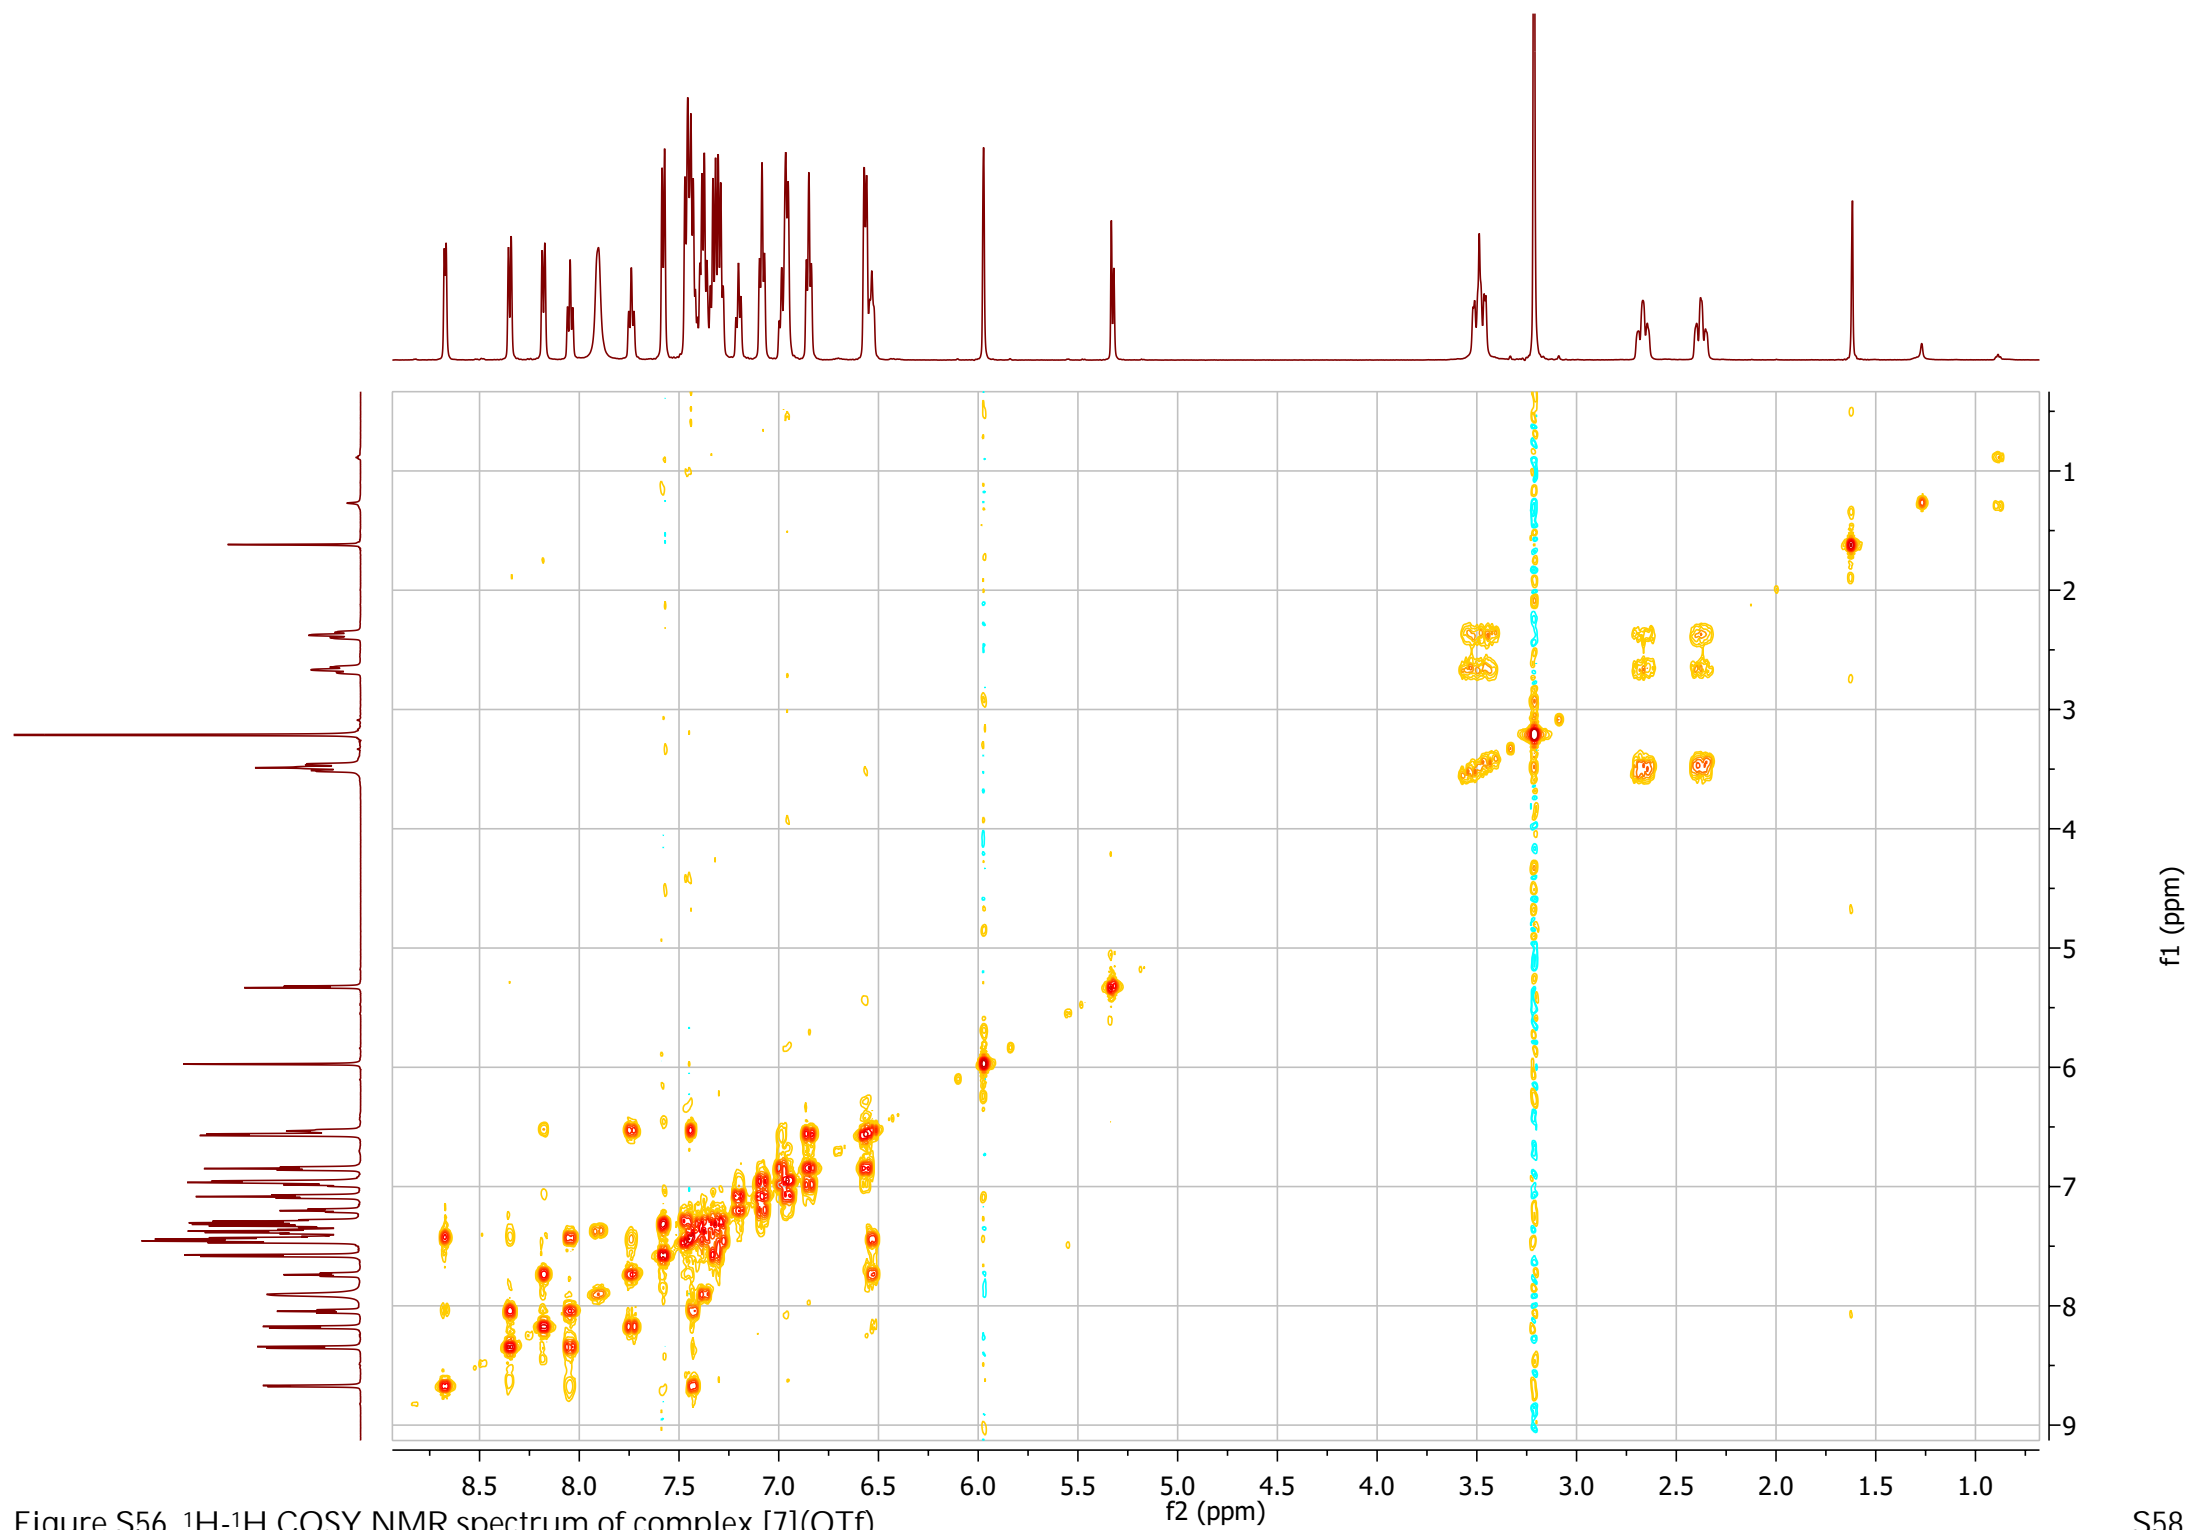

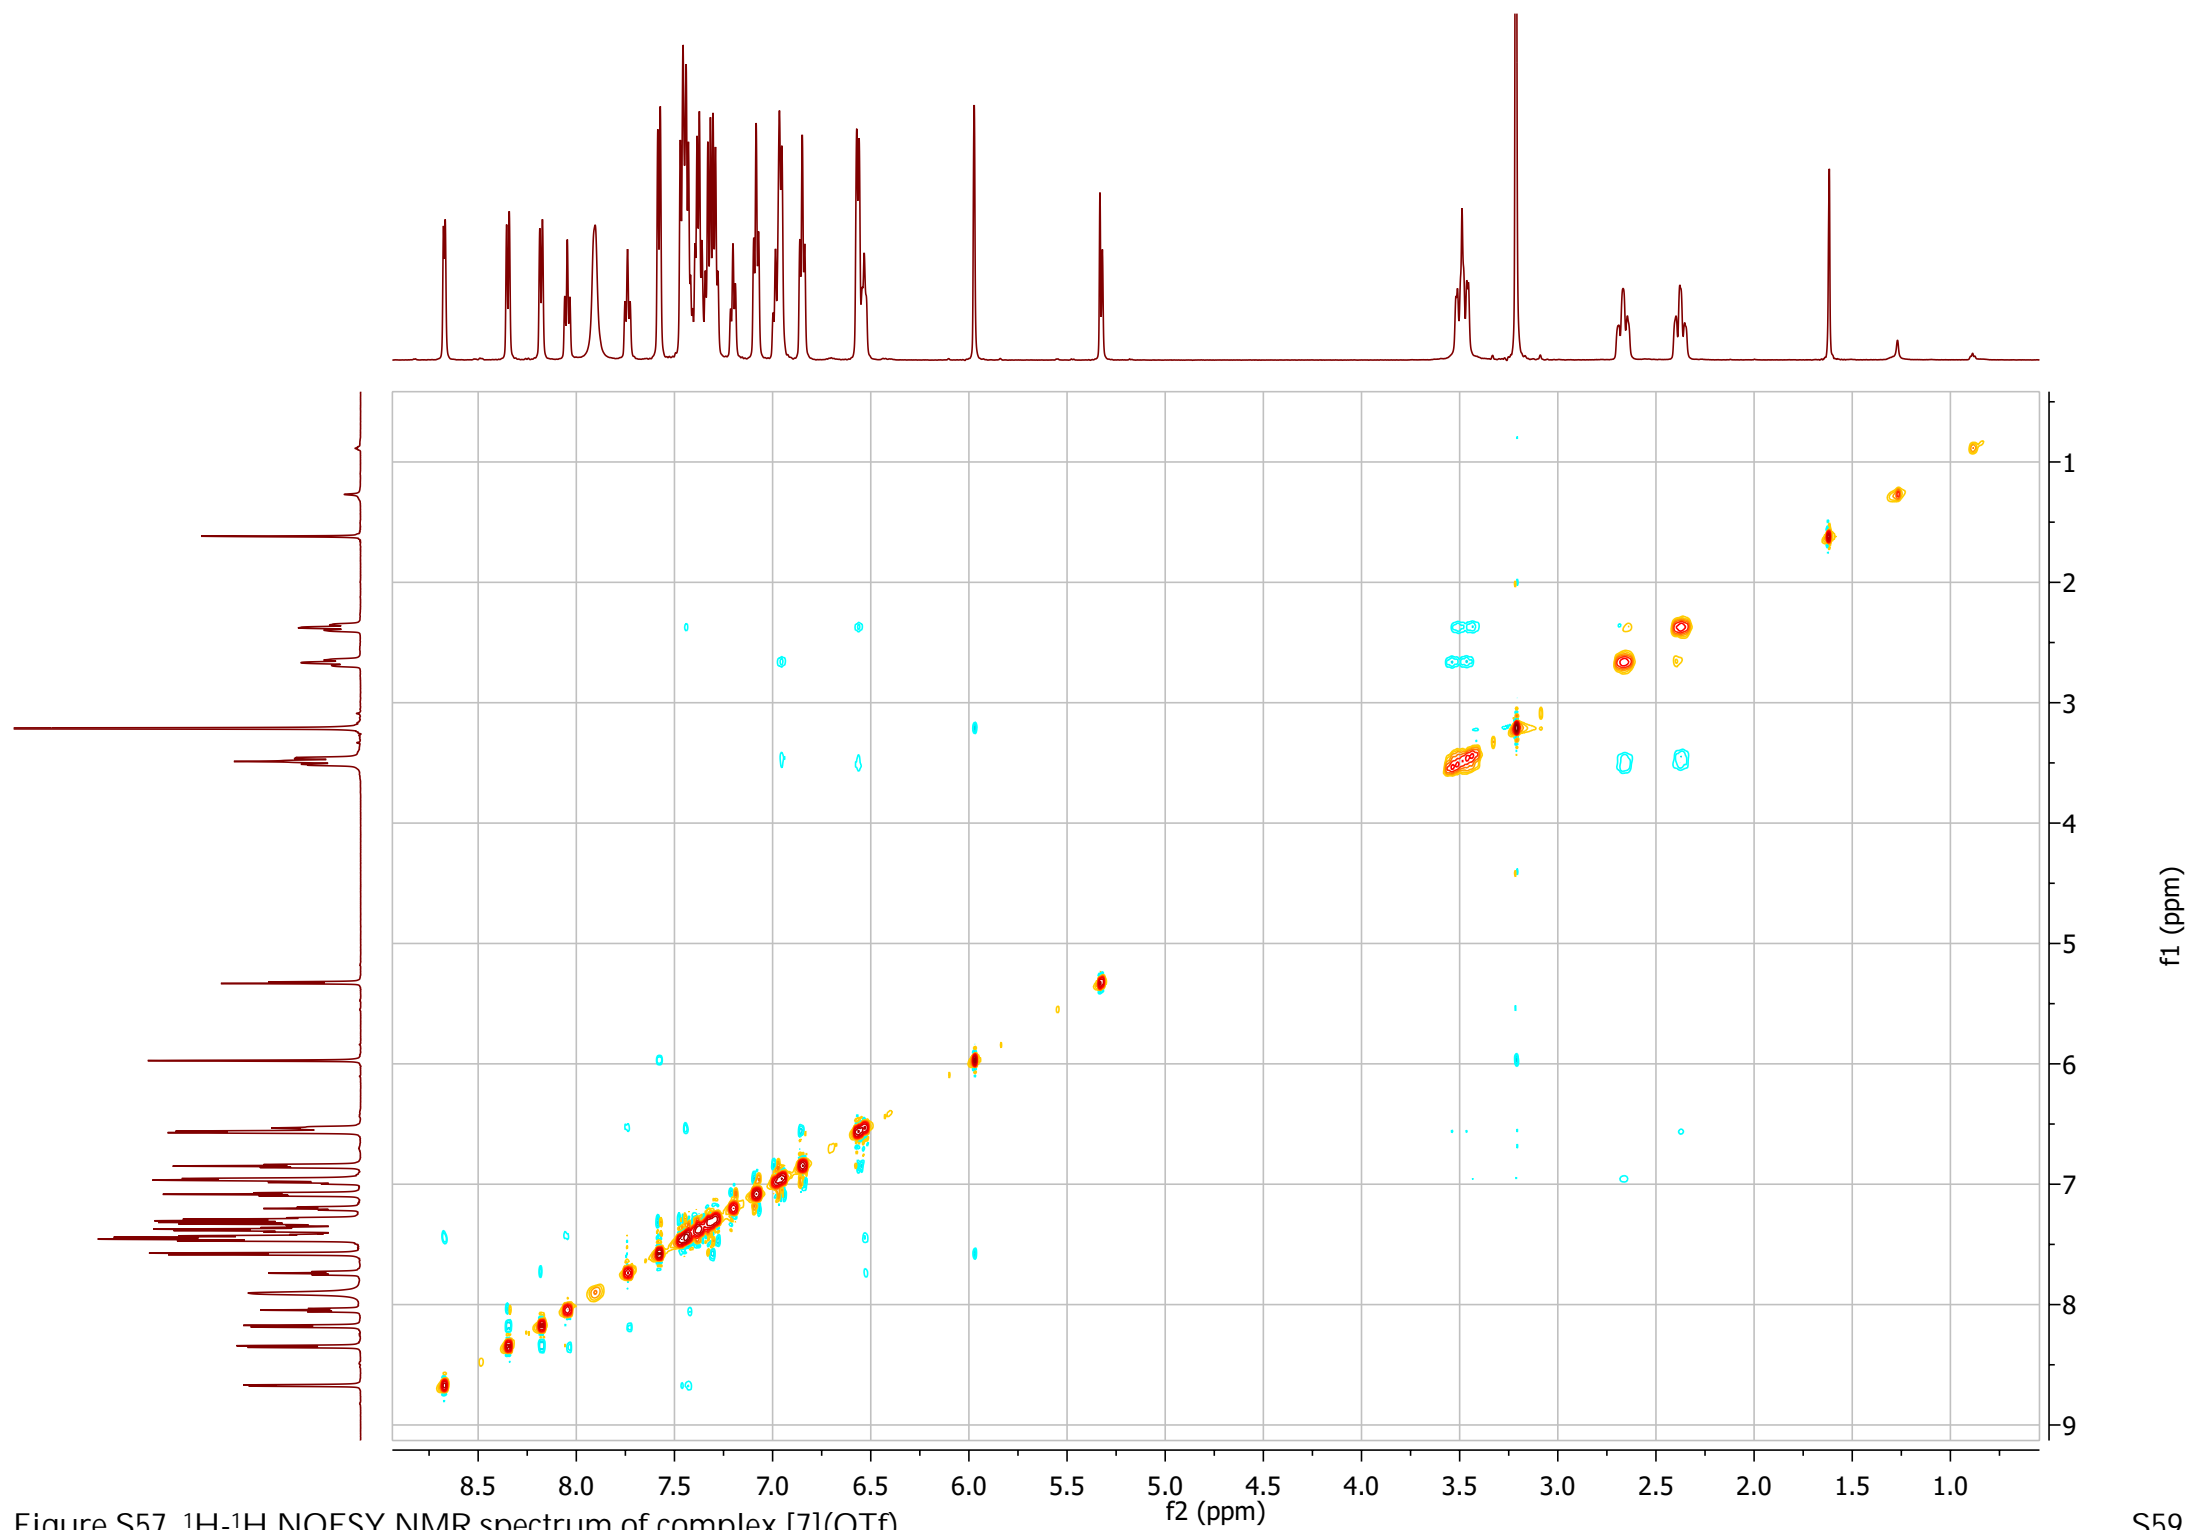

Figure S57.  $^1\text{H}$ - $^1\text{H}$  NOESY NMR spectrum of complex  $[7](\text{OTf})$ .

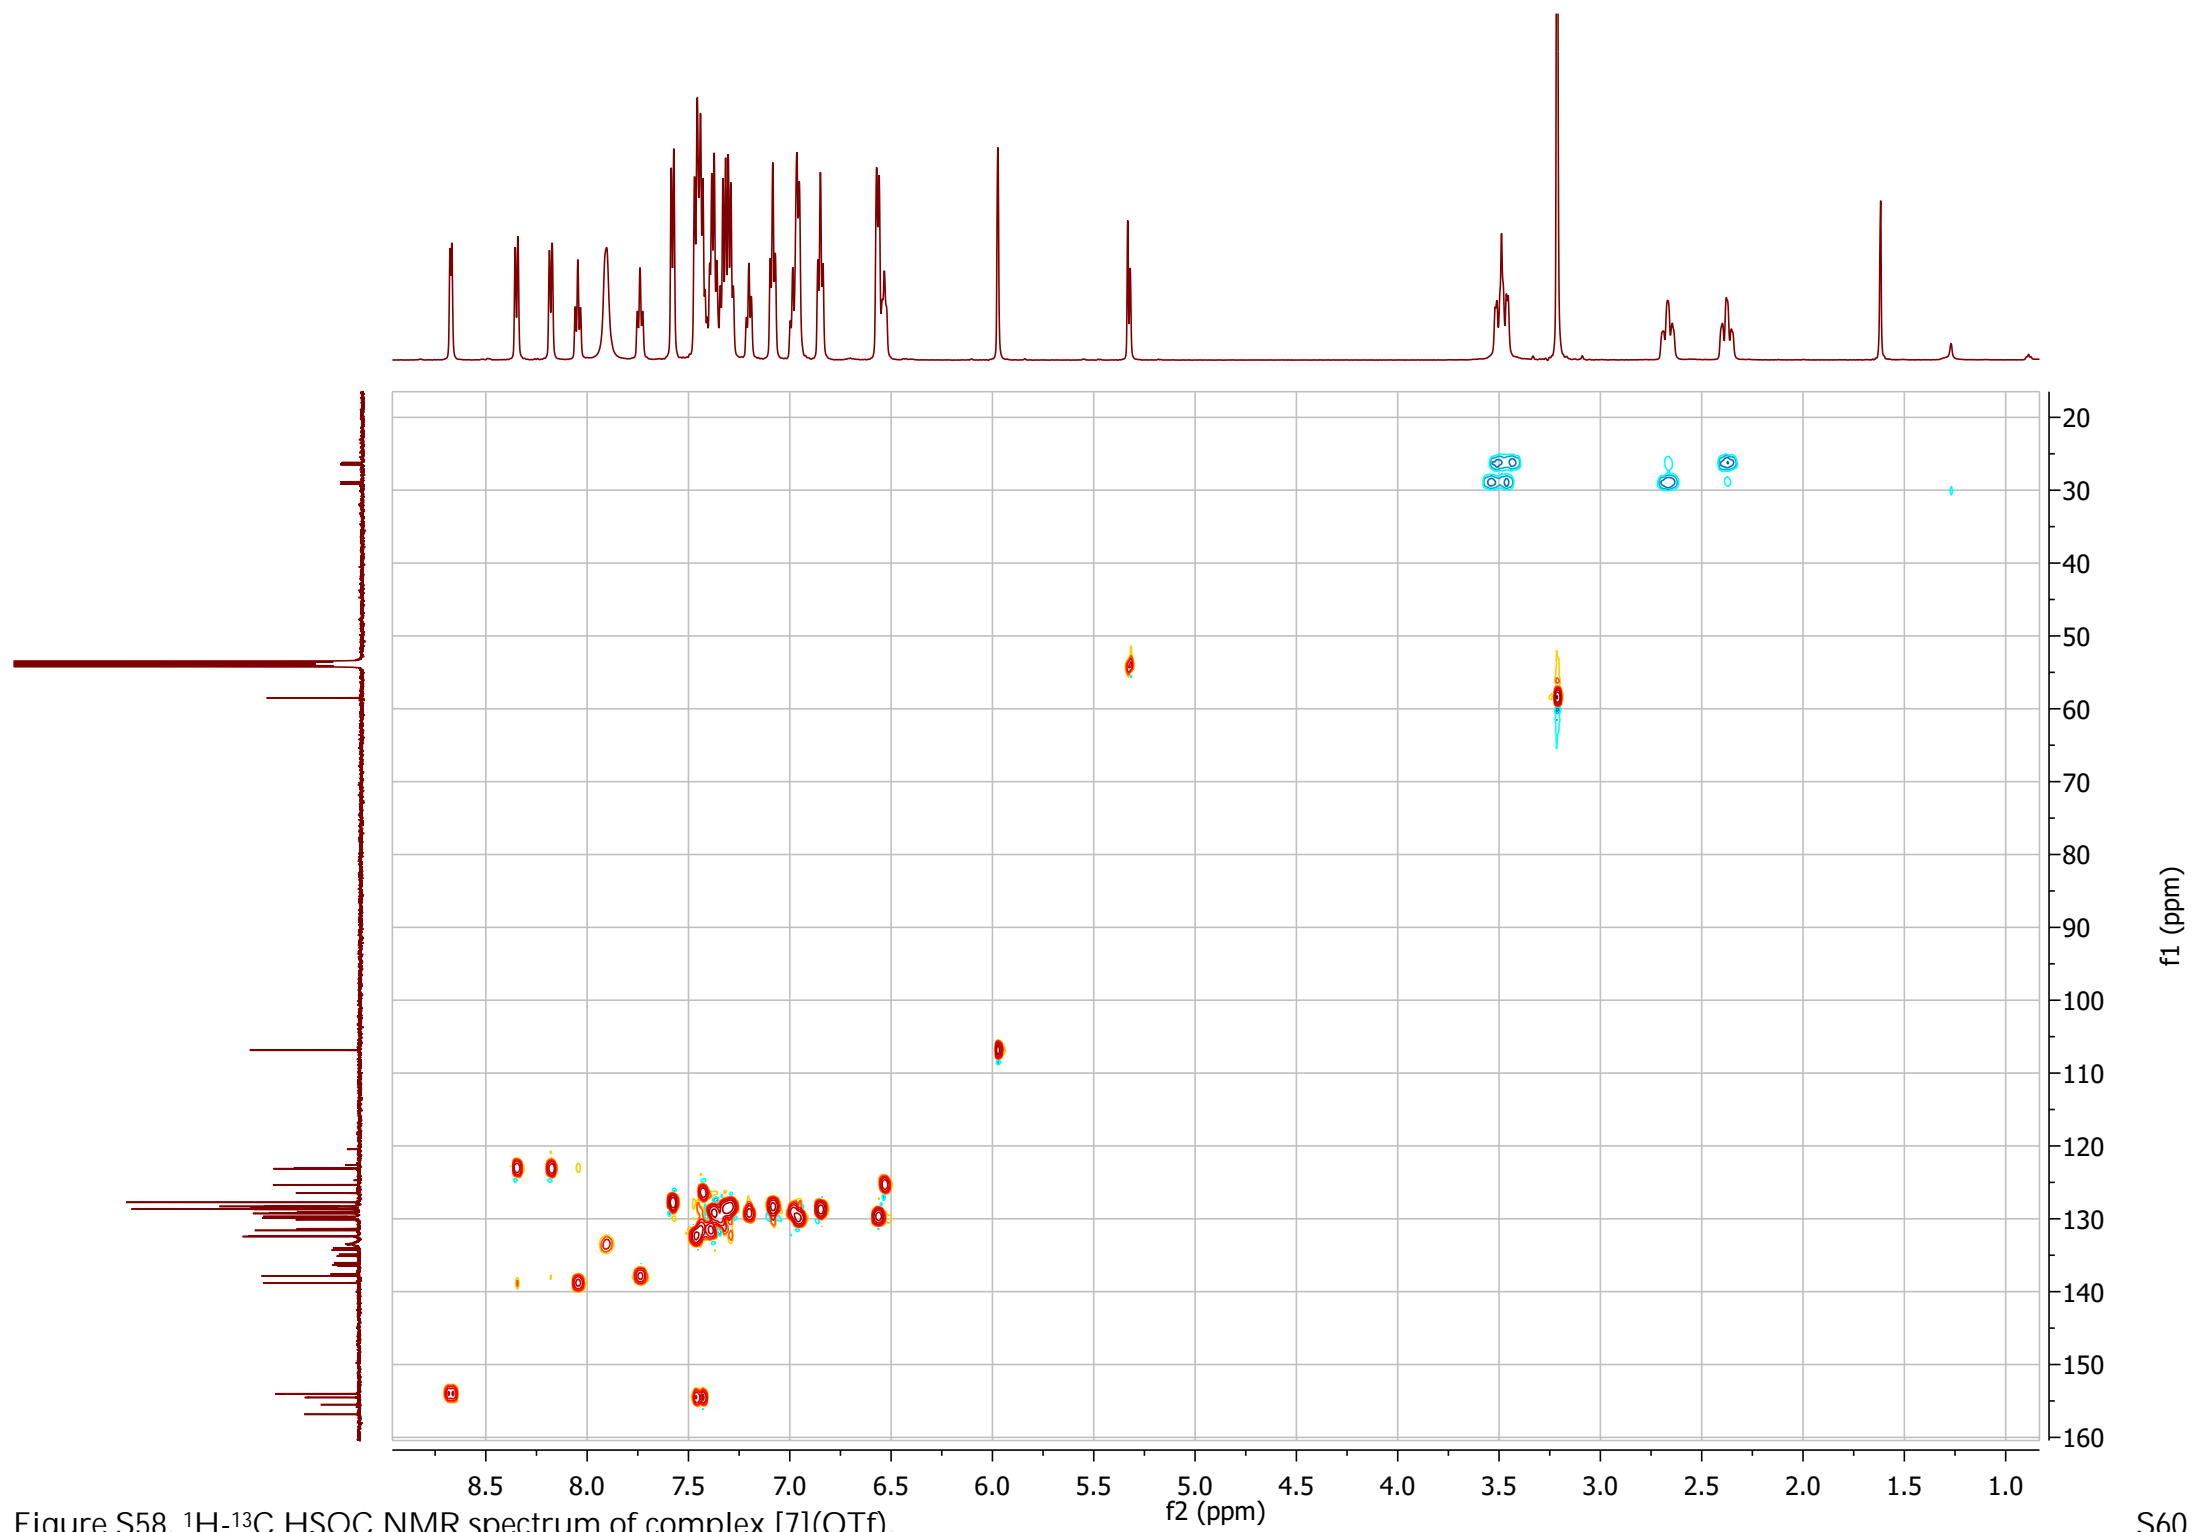

Figure S58.  $^1\text{H}$ - $^{13}\text{C}$  HSQC NMR spectrum of complex  $[7](\text{OTf})$ .



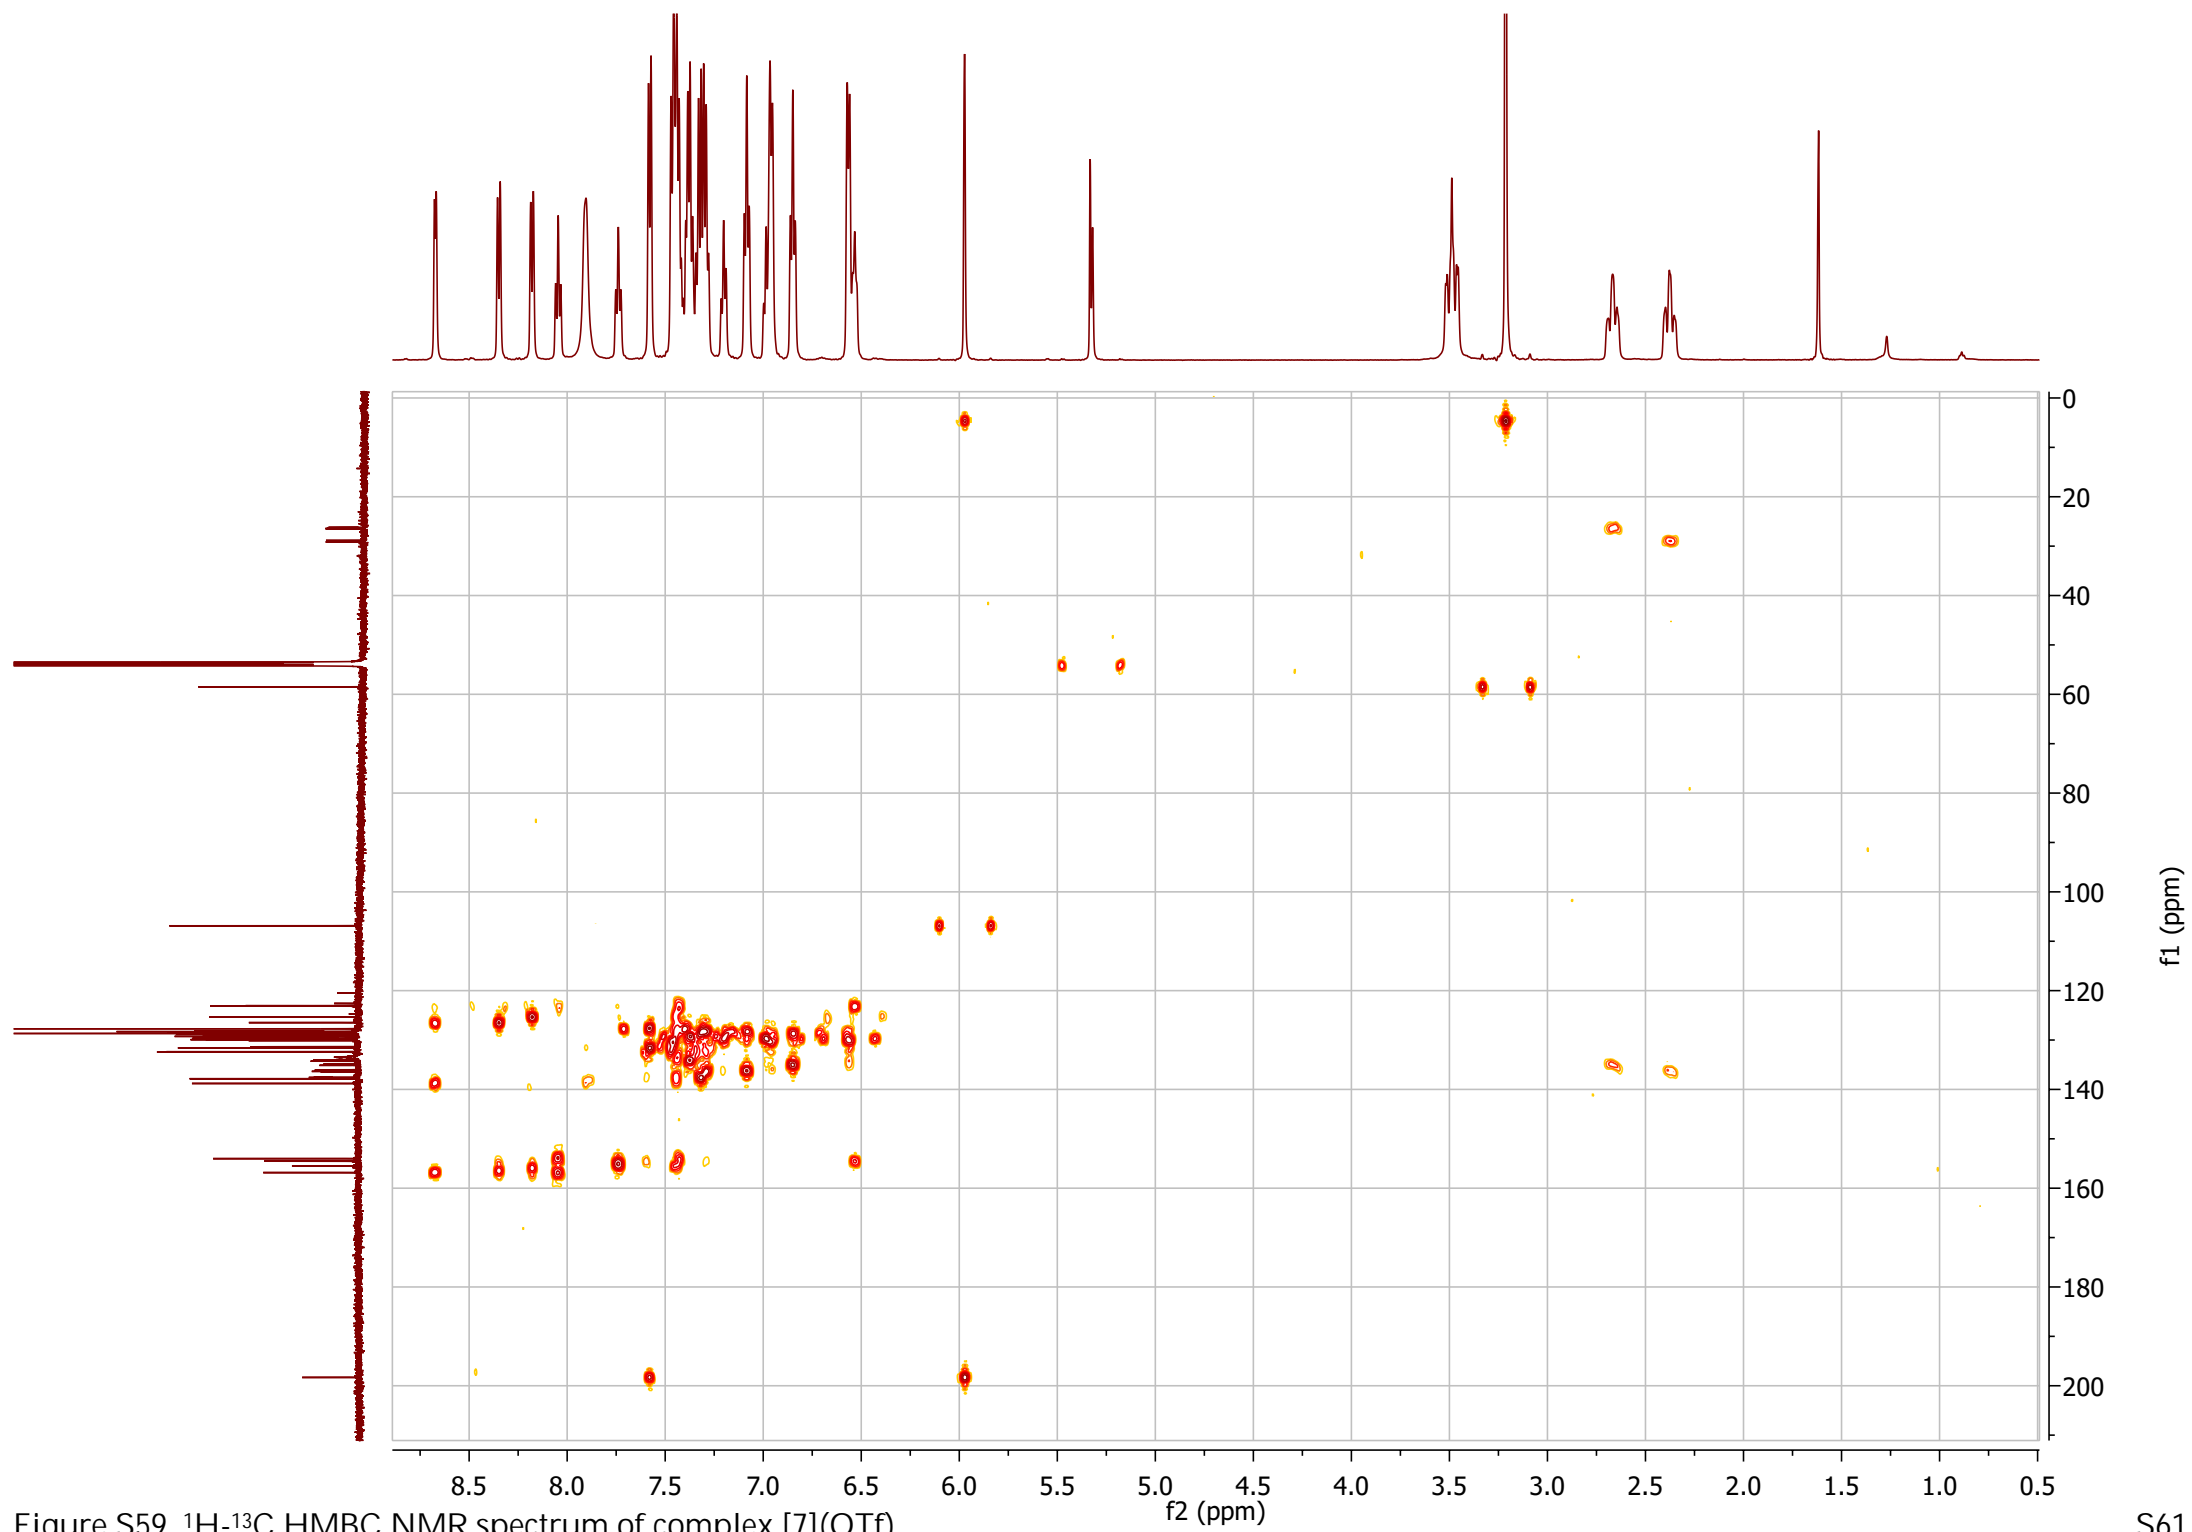

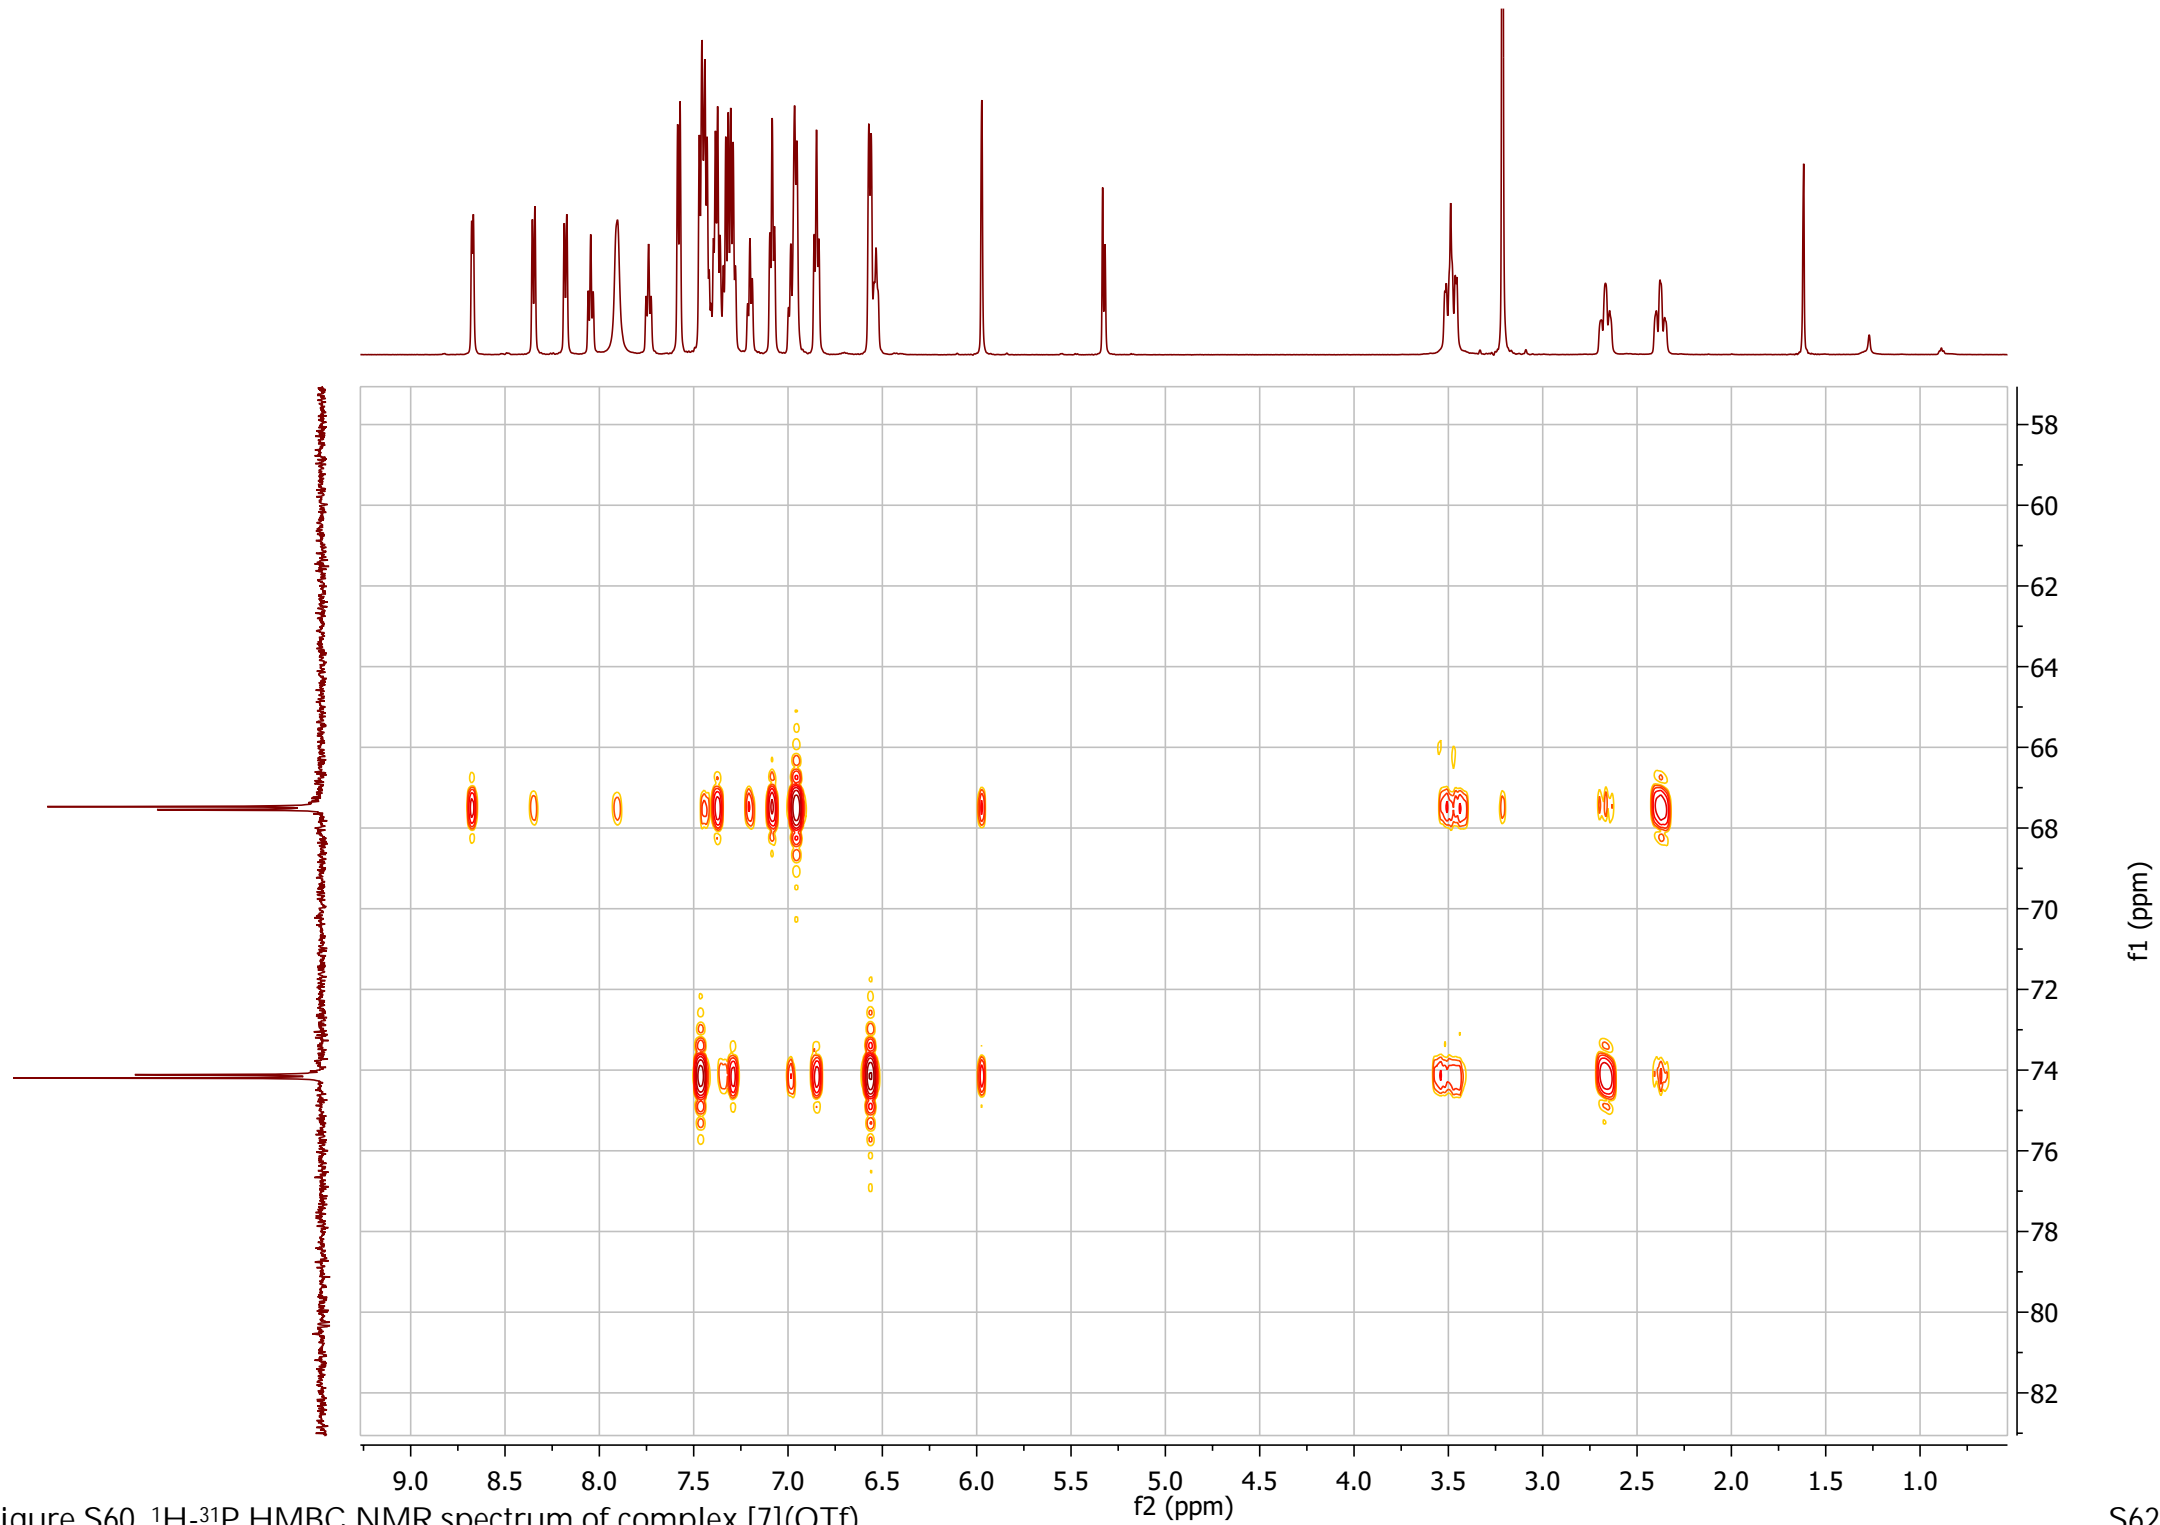

Figure S60.  $^1\text{H}$ - $^{31}\text{P}$  HMBC NMR spectrum of complex  $[7](\text{OTf})$ .

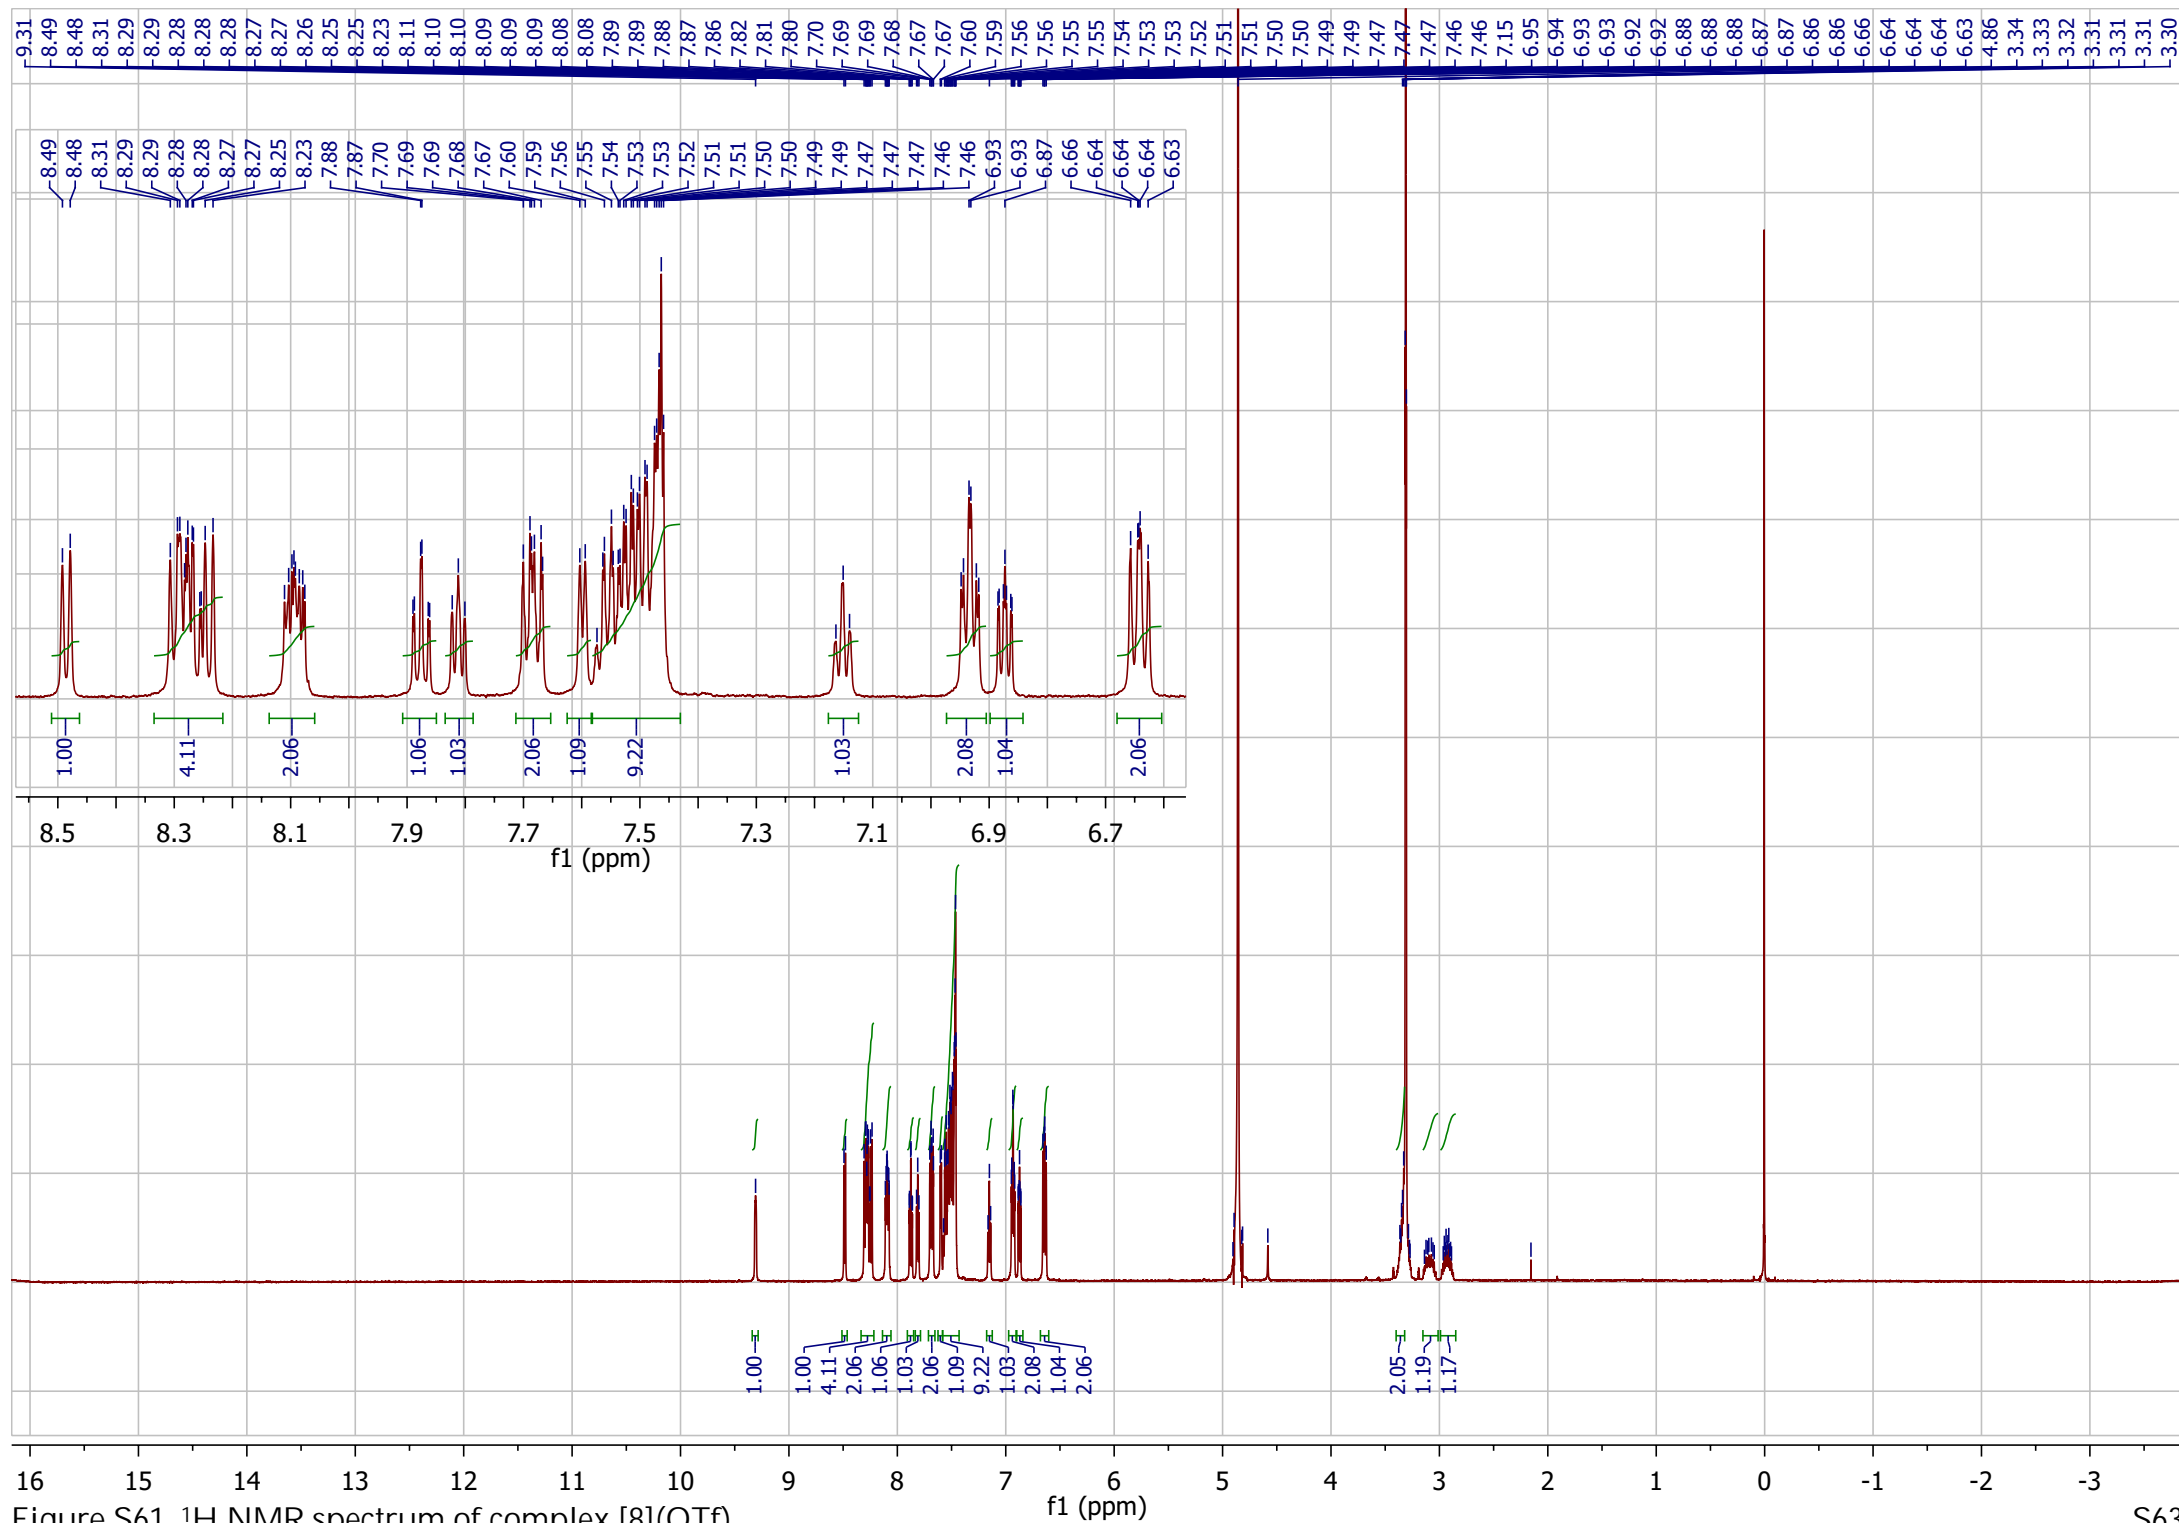

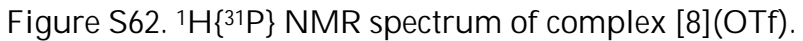

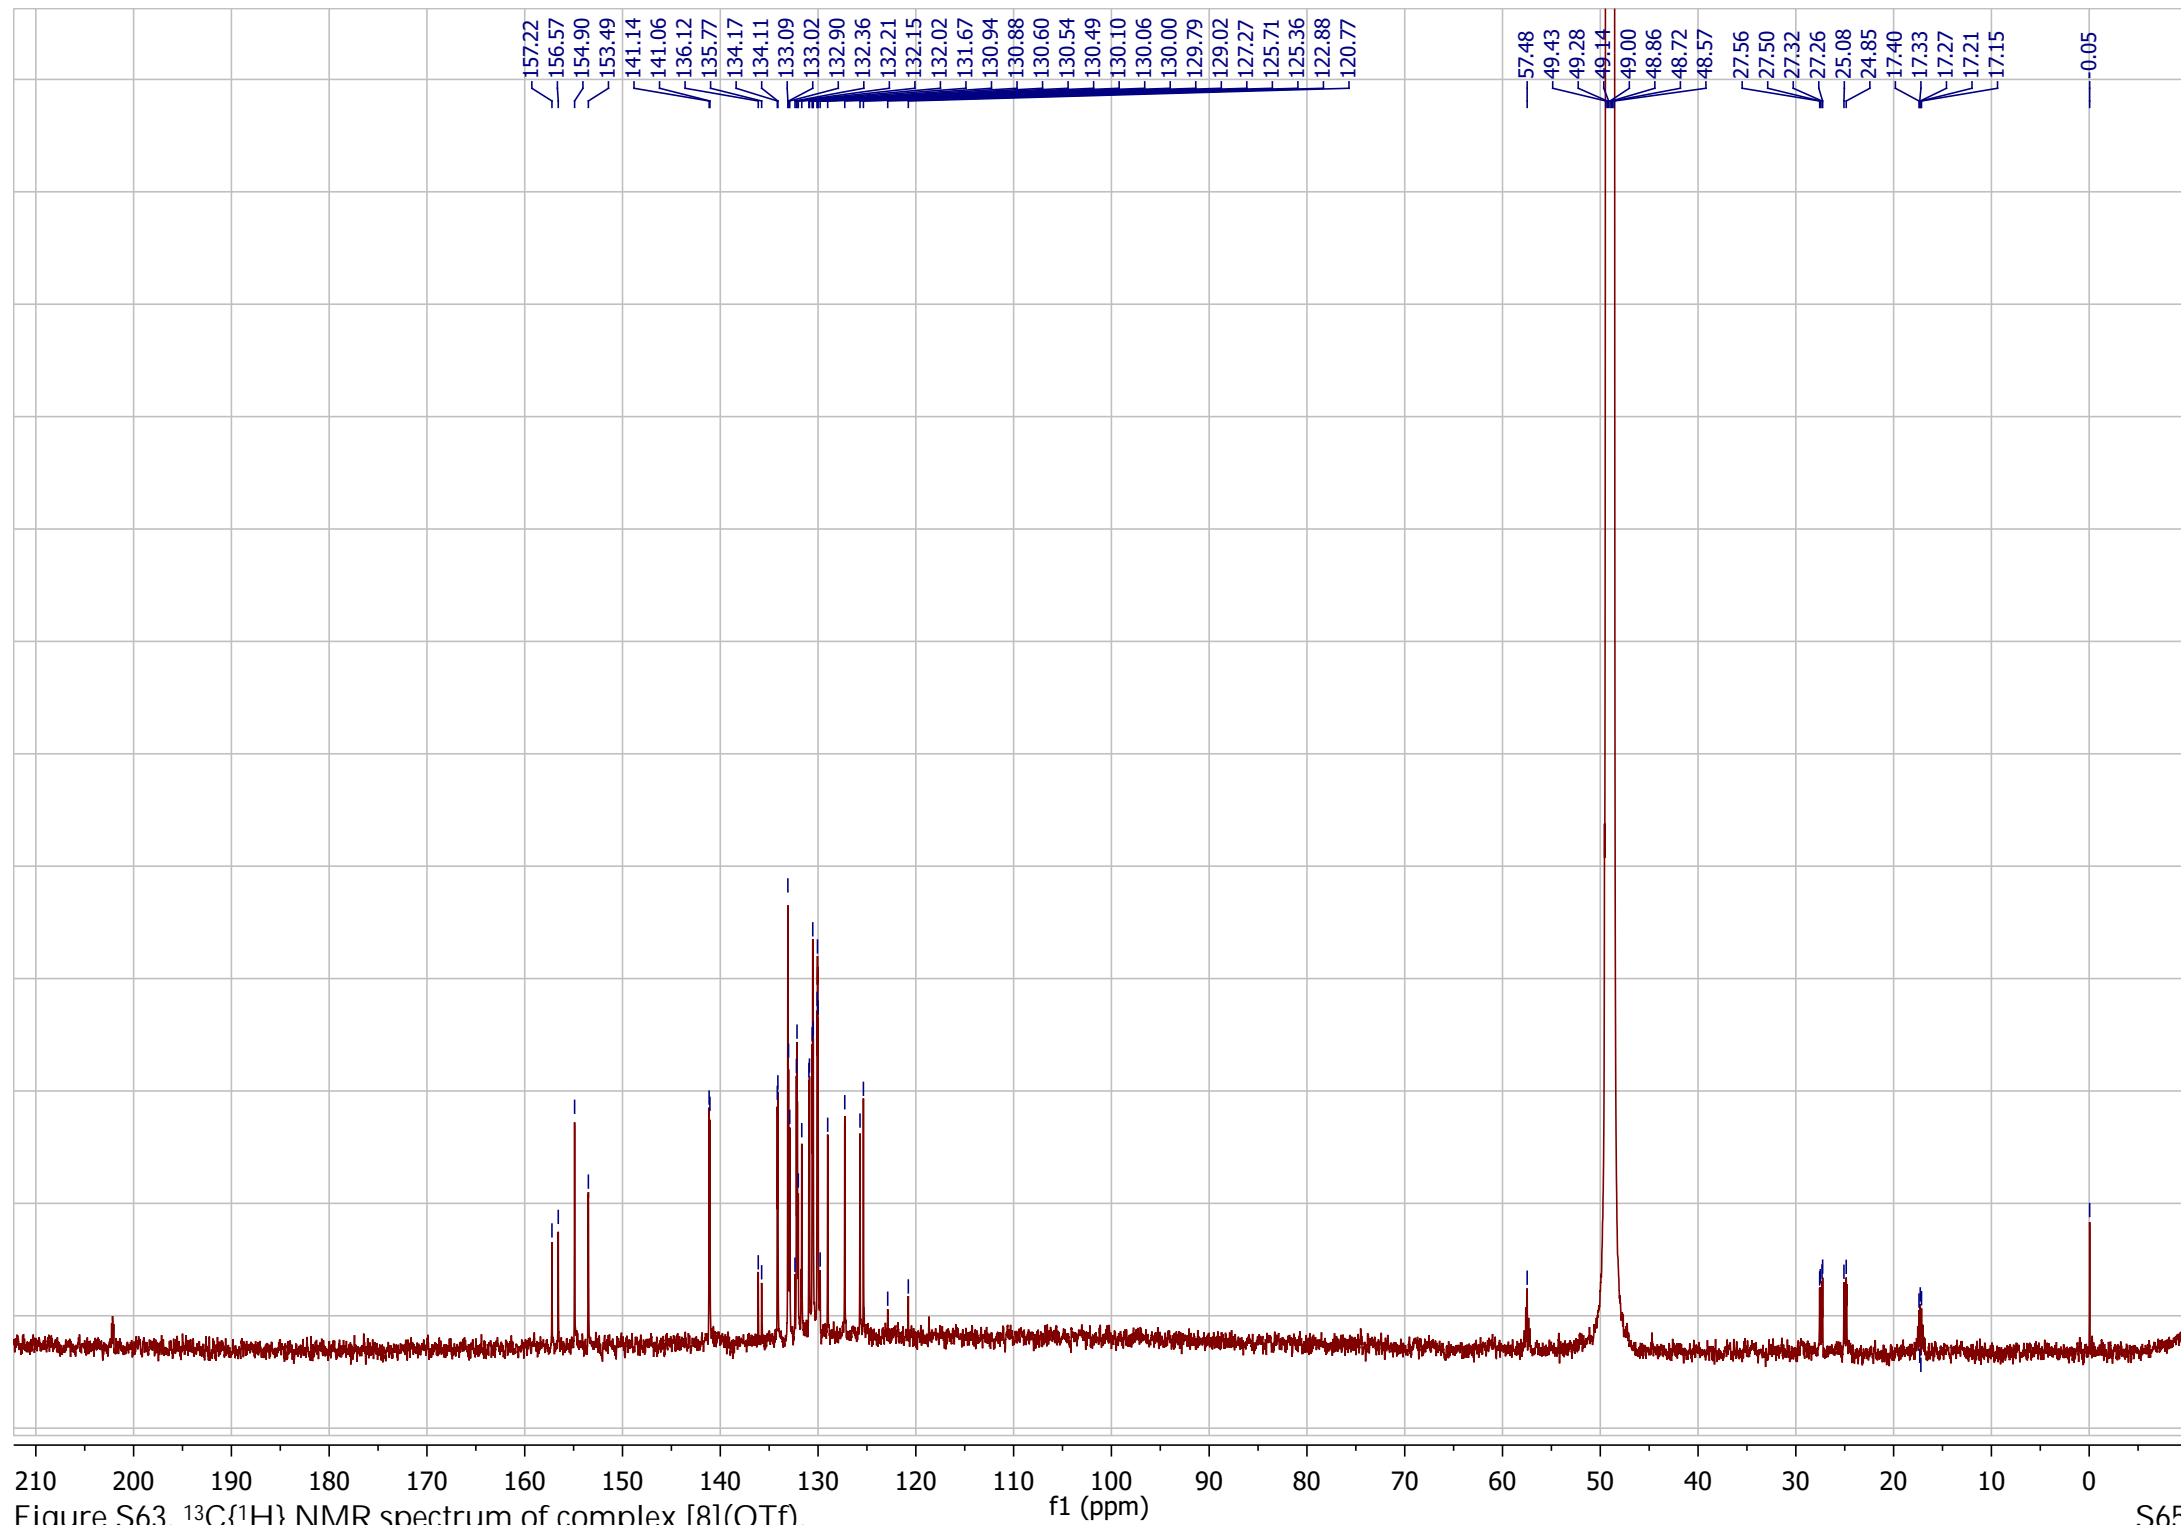

Figure S63.  $^{13}\text{C}\{^1\text{H}\}$  NMR spectrum of complex [8](OTf).

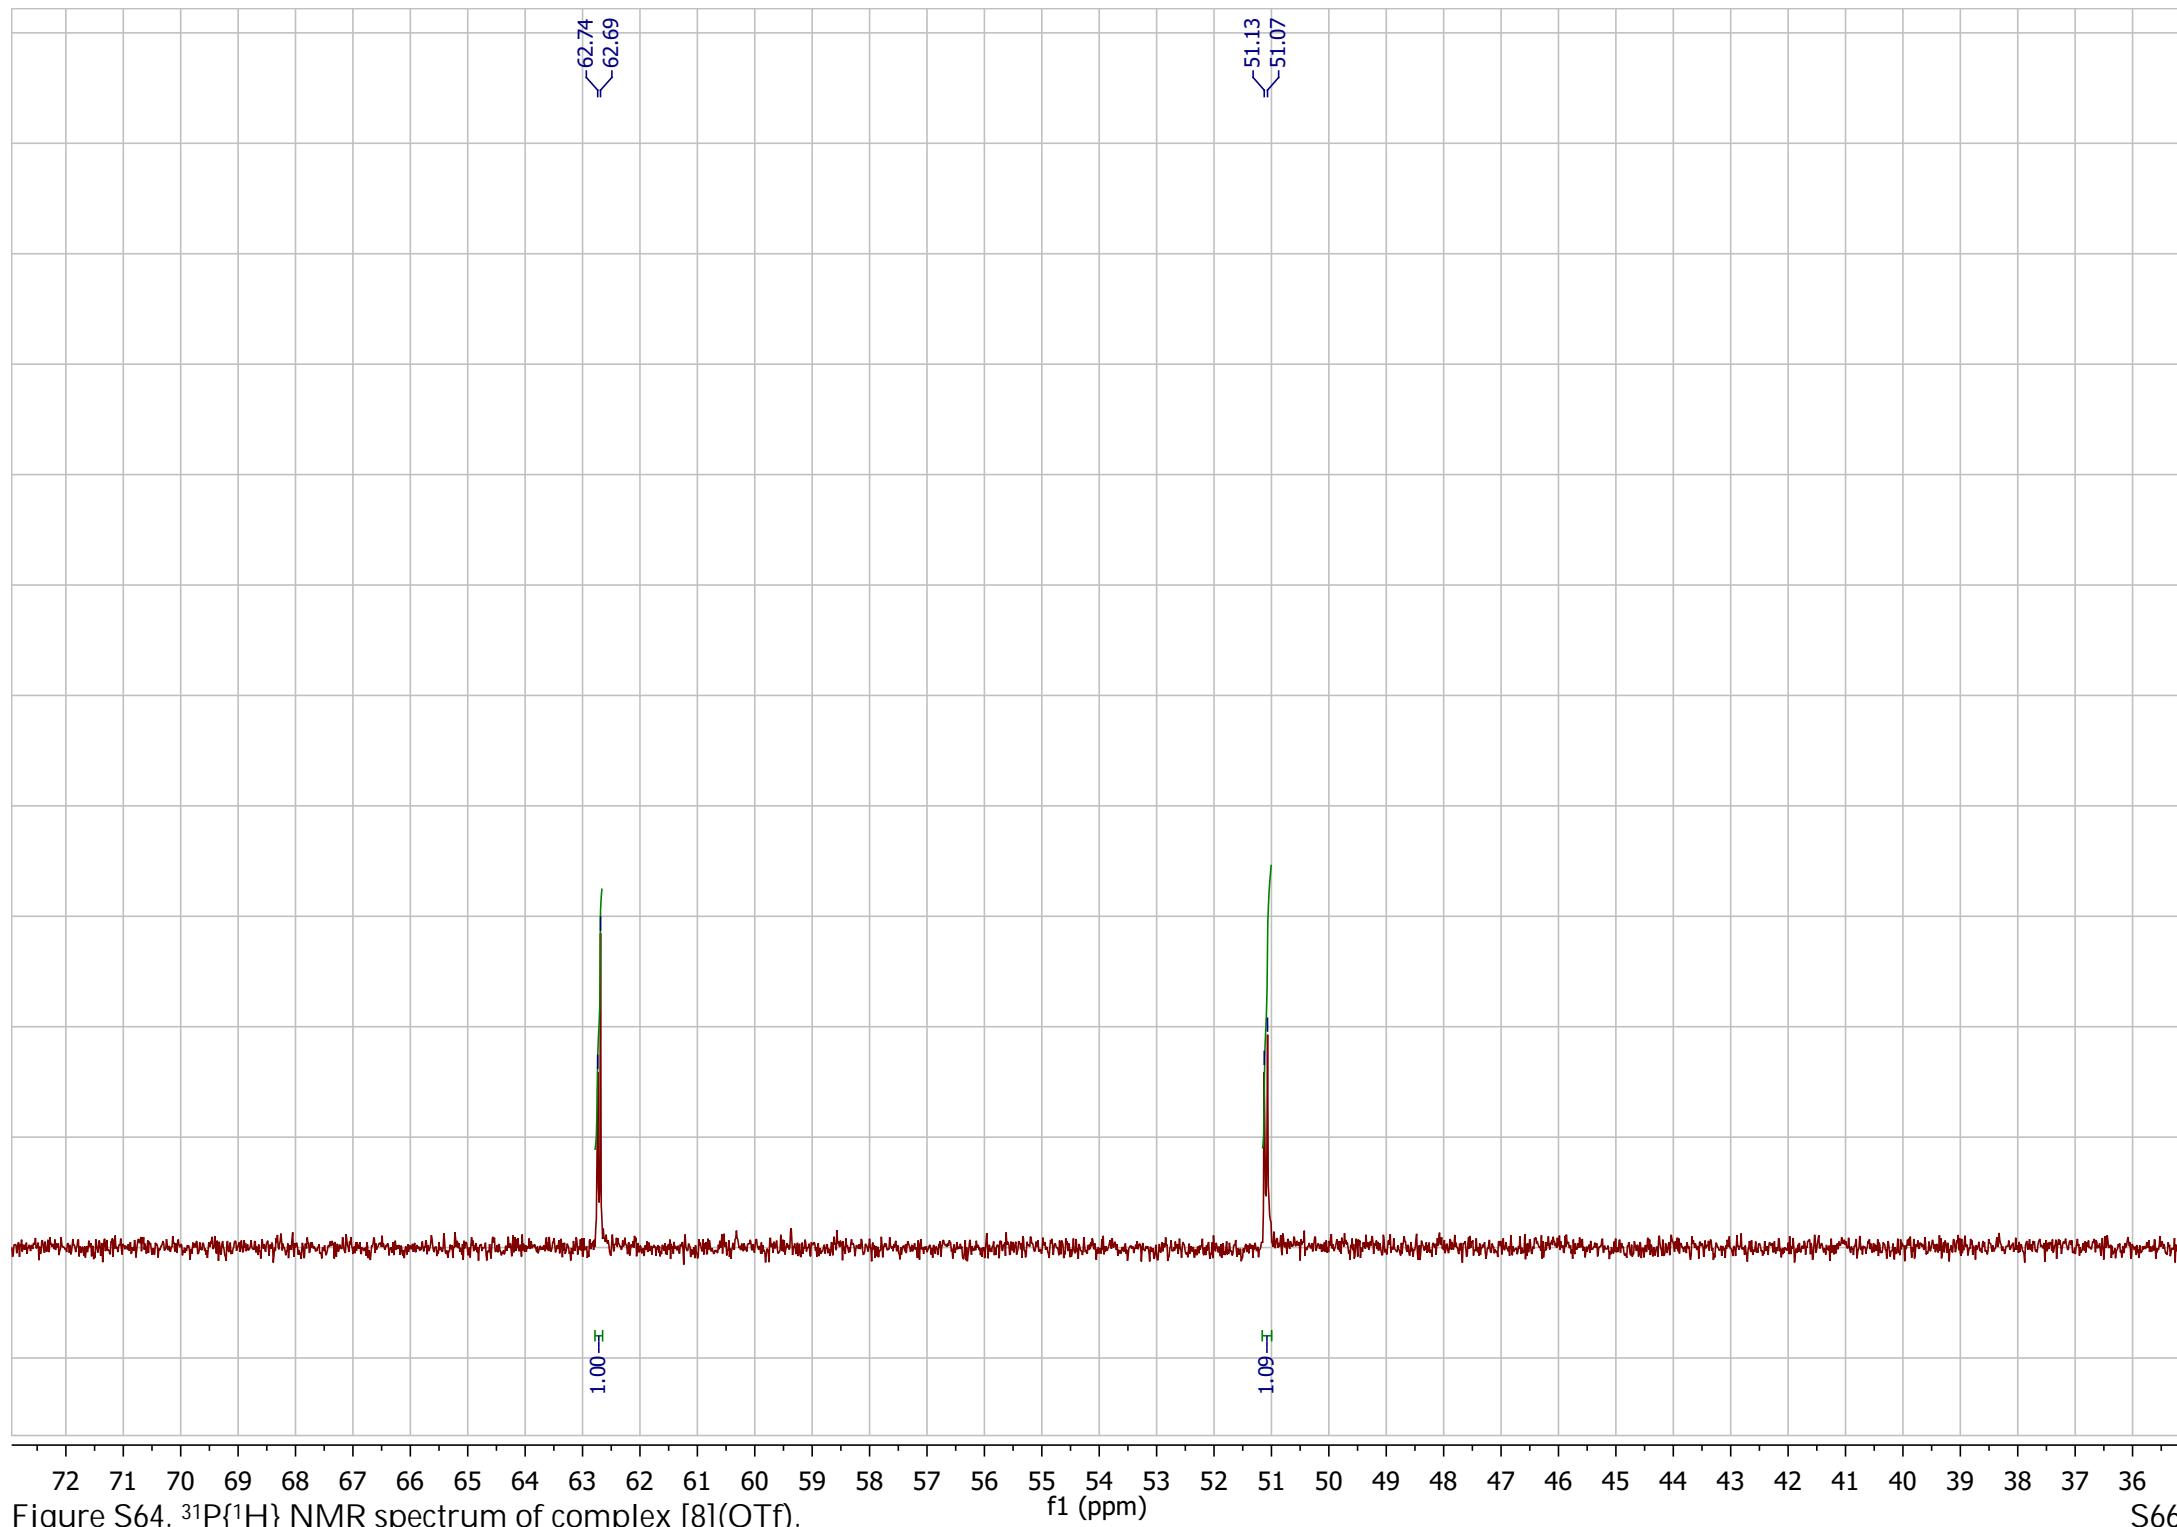

Figure S64.  $^{31}\text{P}\{^1\text{H}\}$  NMR spectrum of complex [8](OTf).

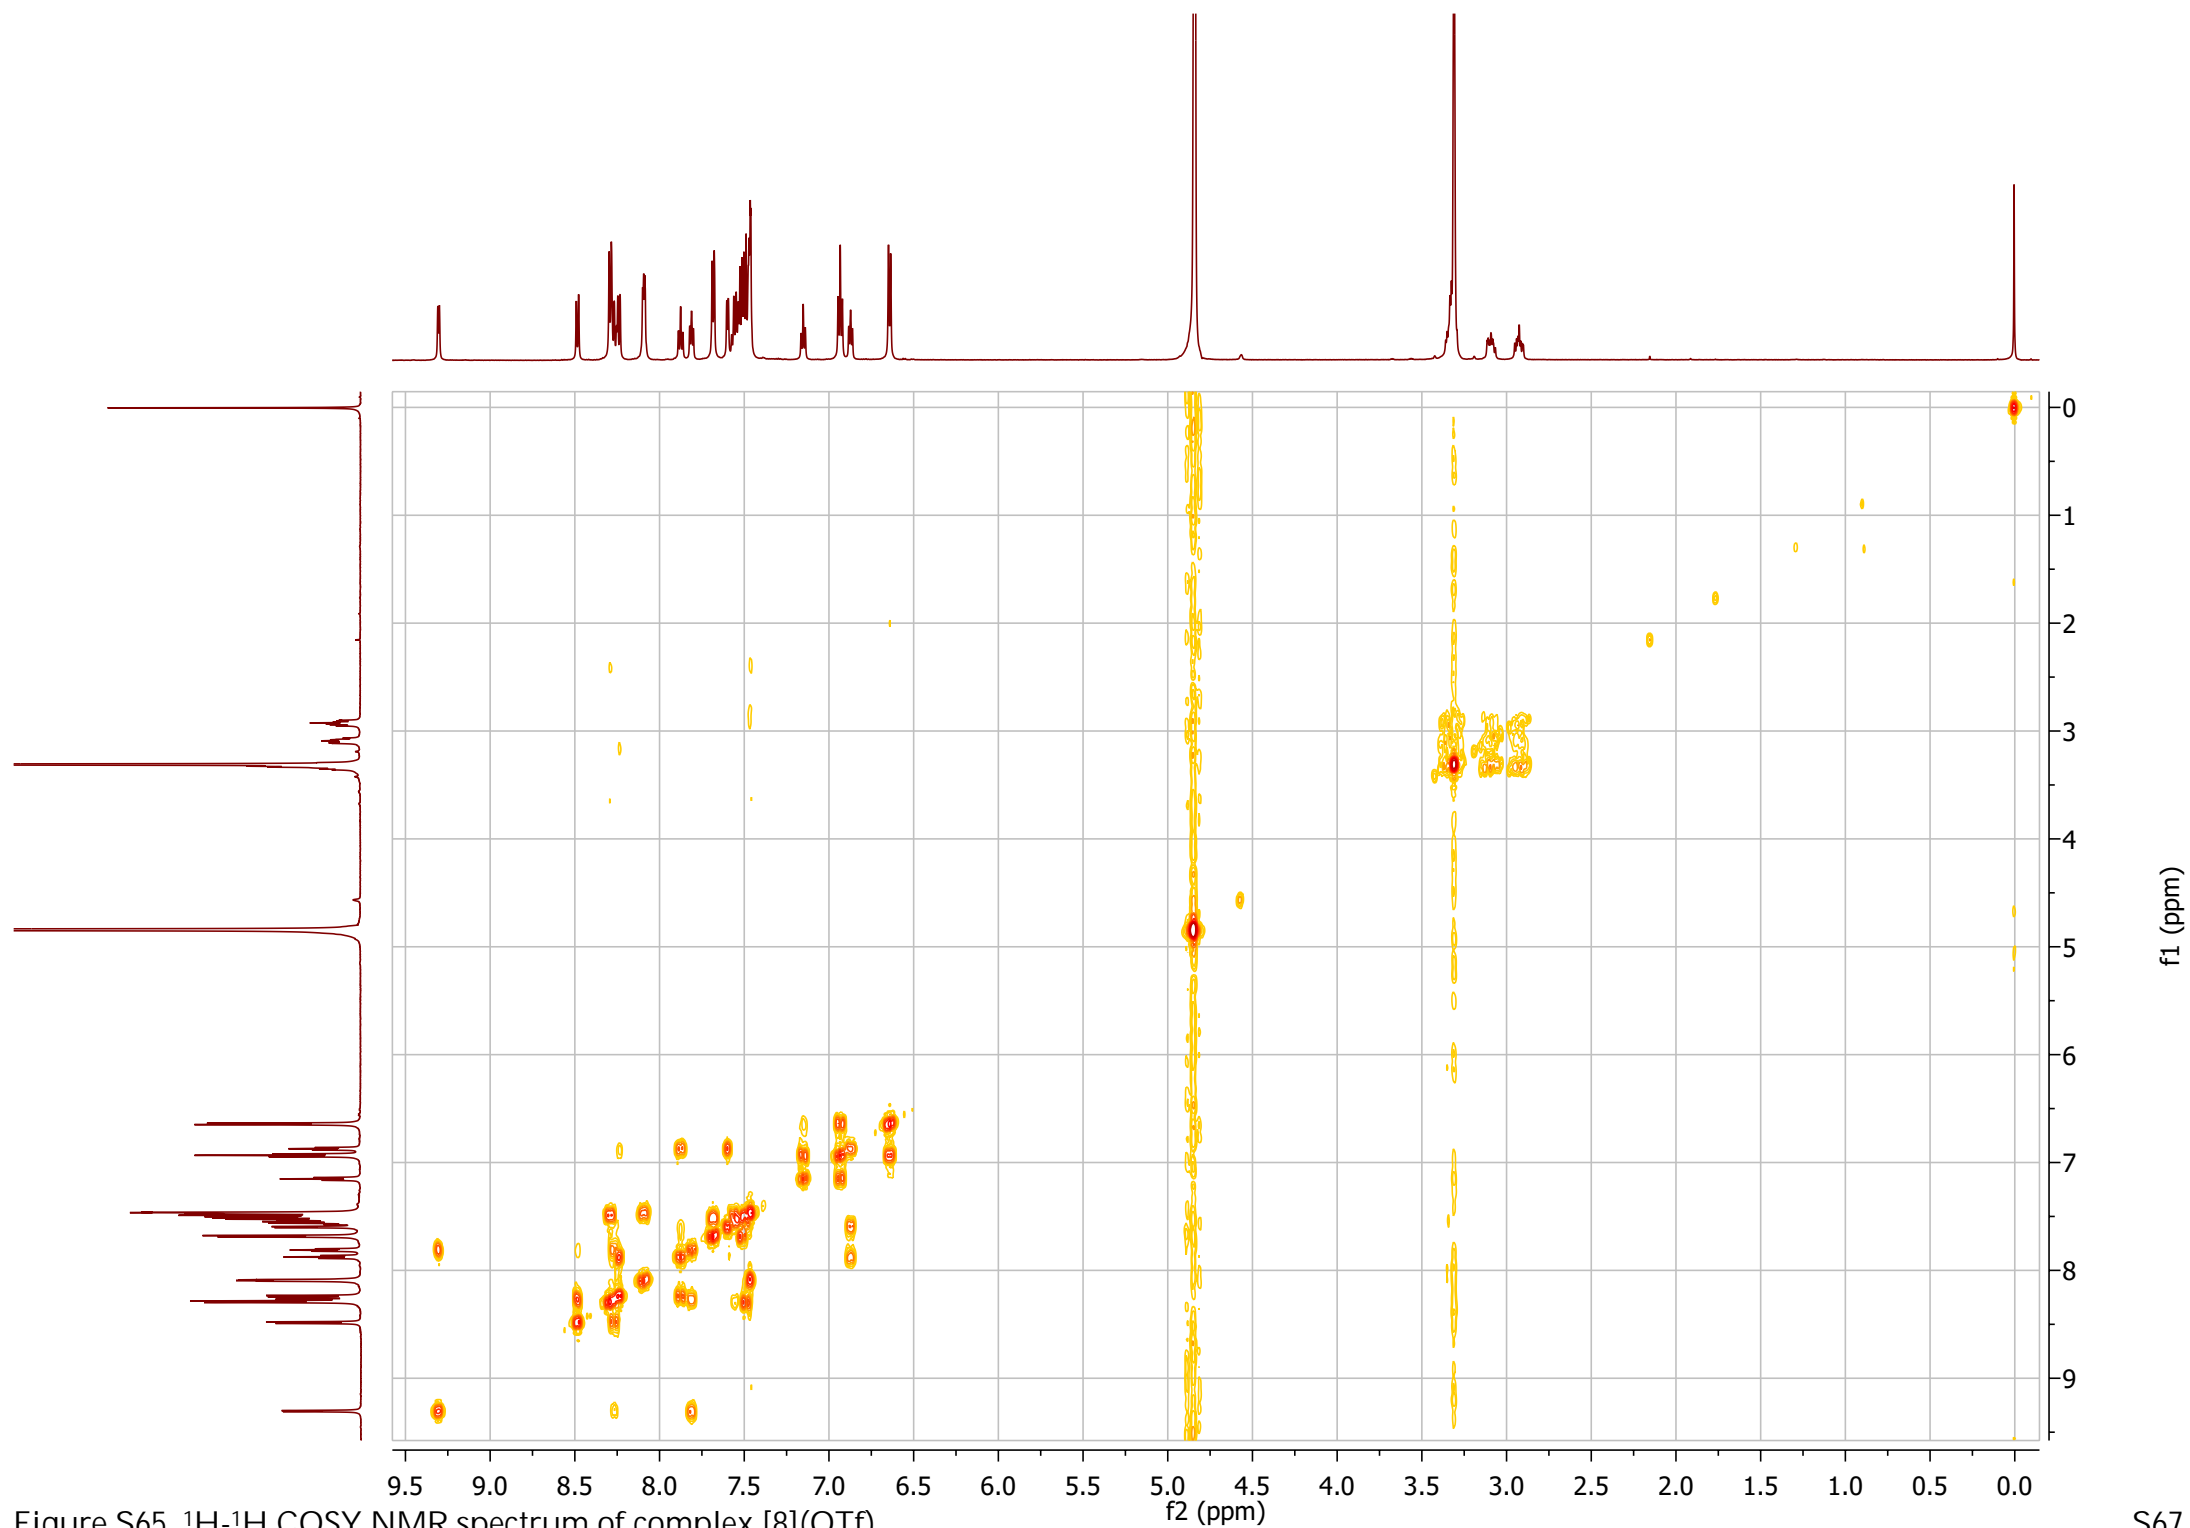

Figure S65.  $^1\text{H}$ - $^1\text{H}$  COSY NMR spectrum of complex [8](OTf).

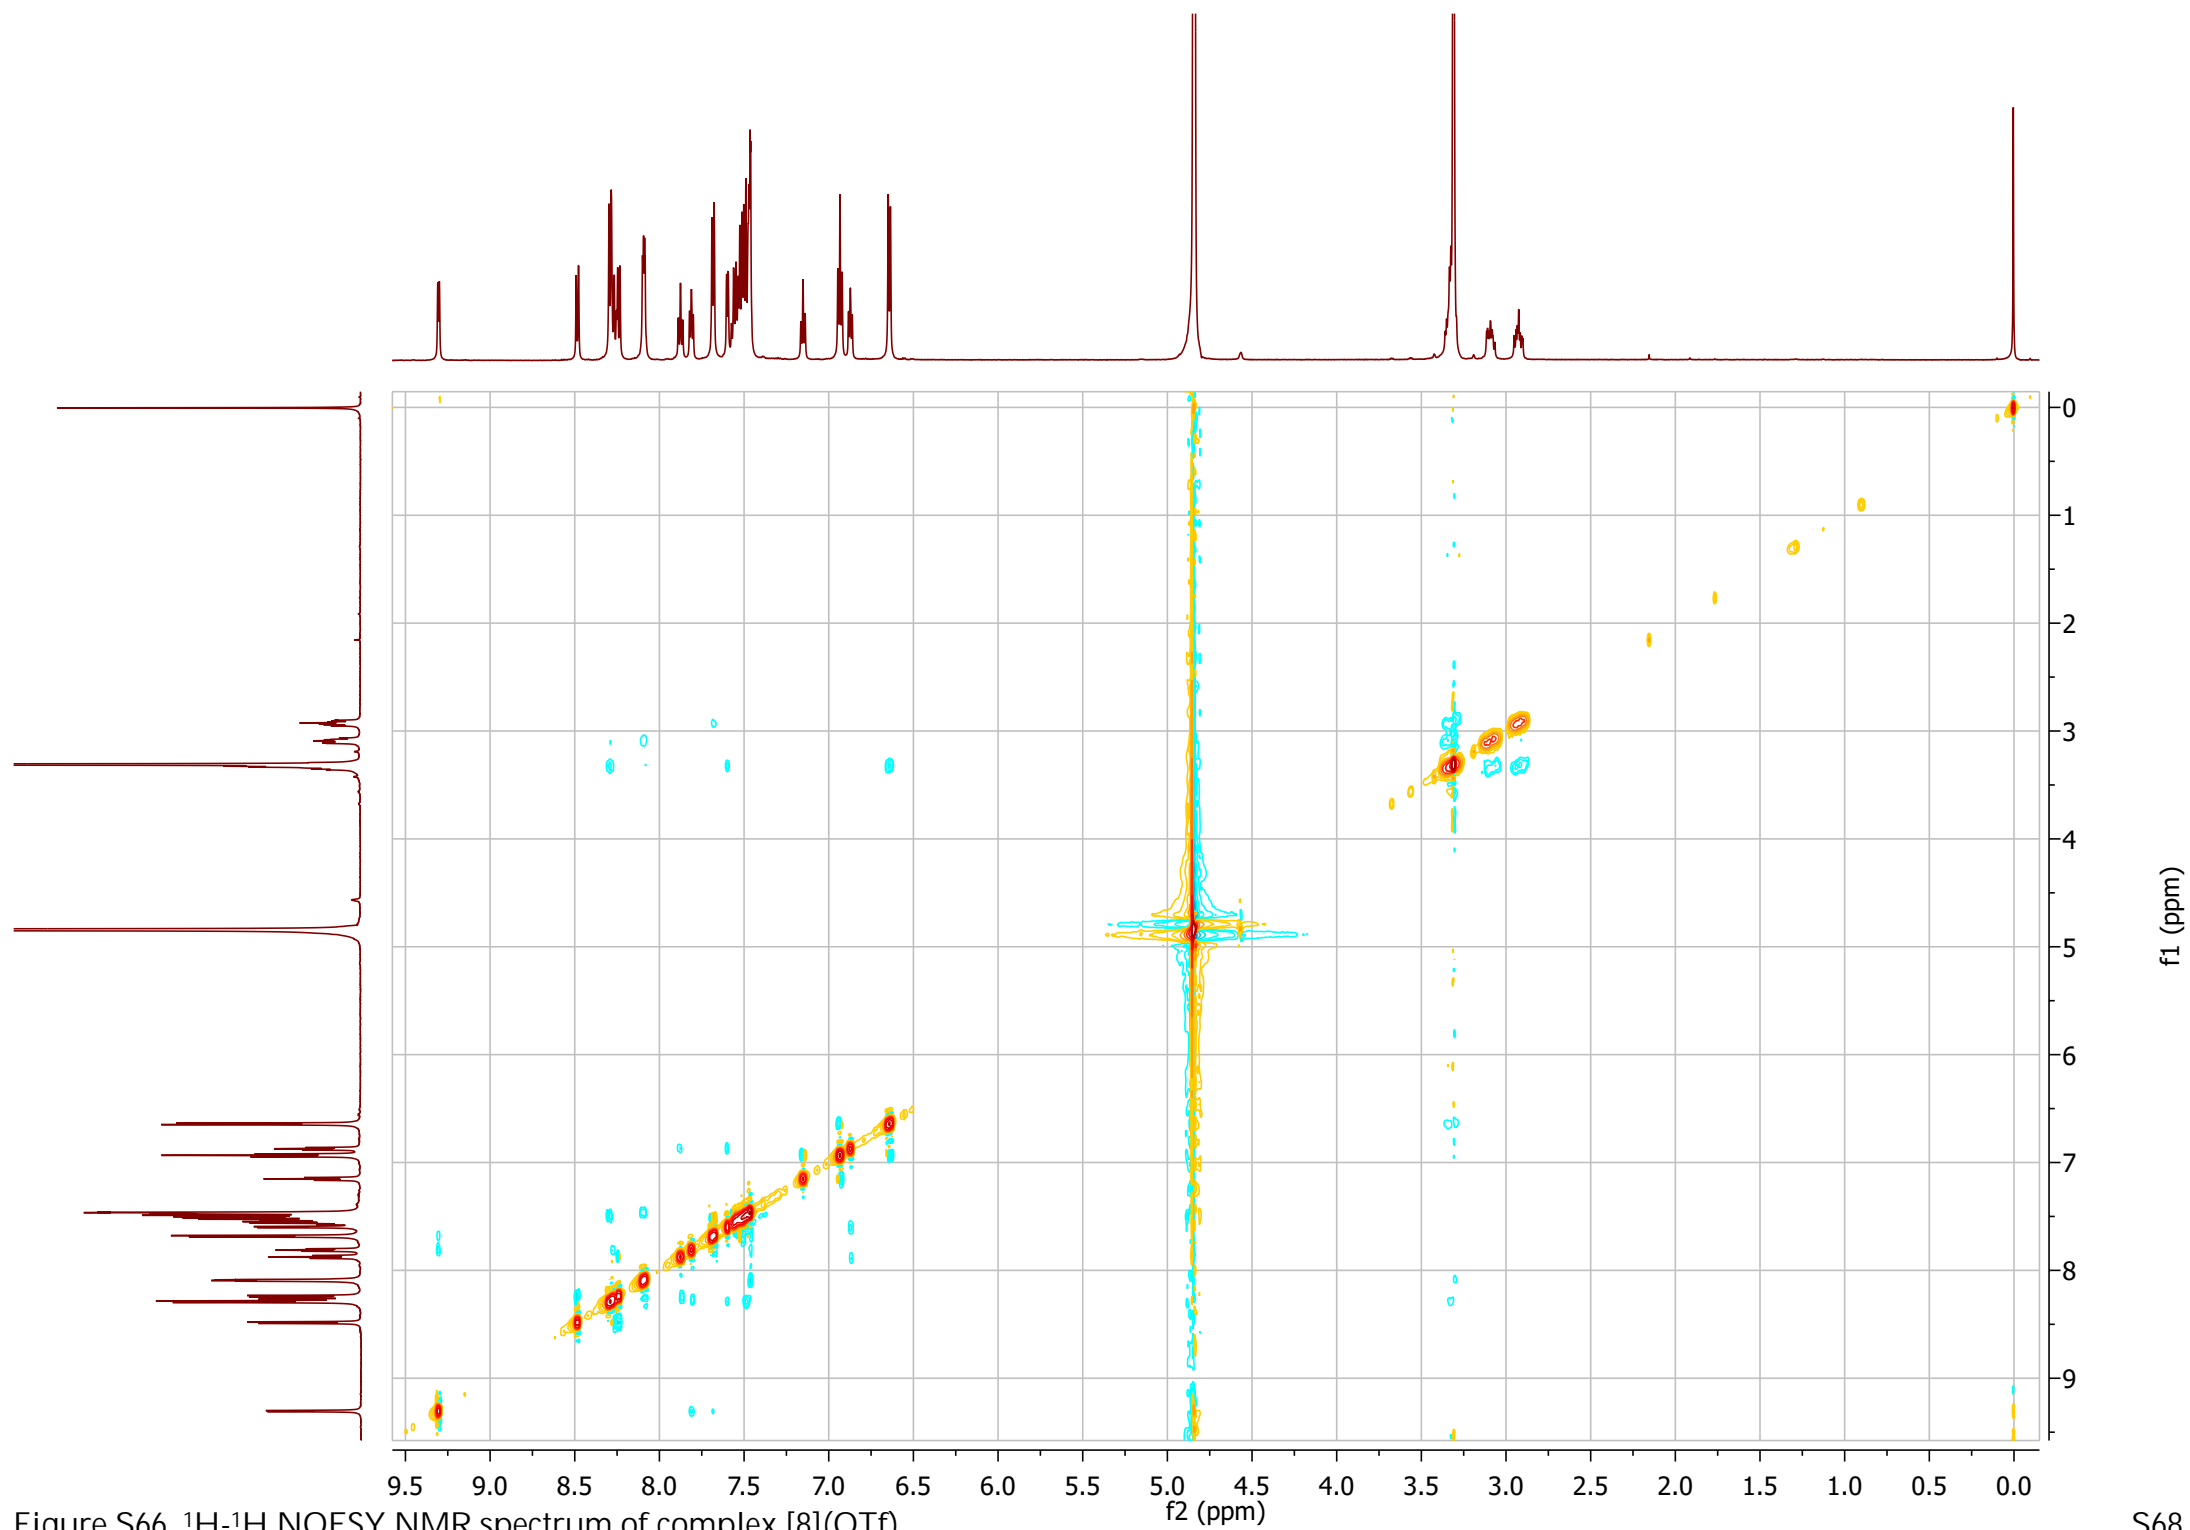



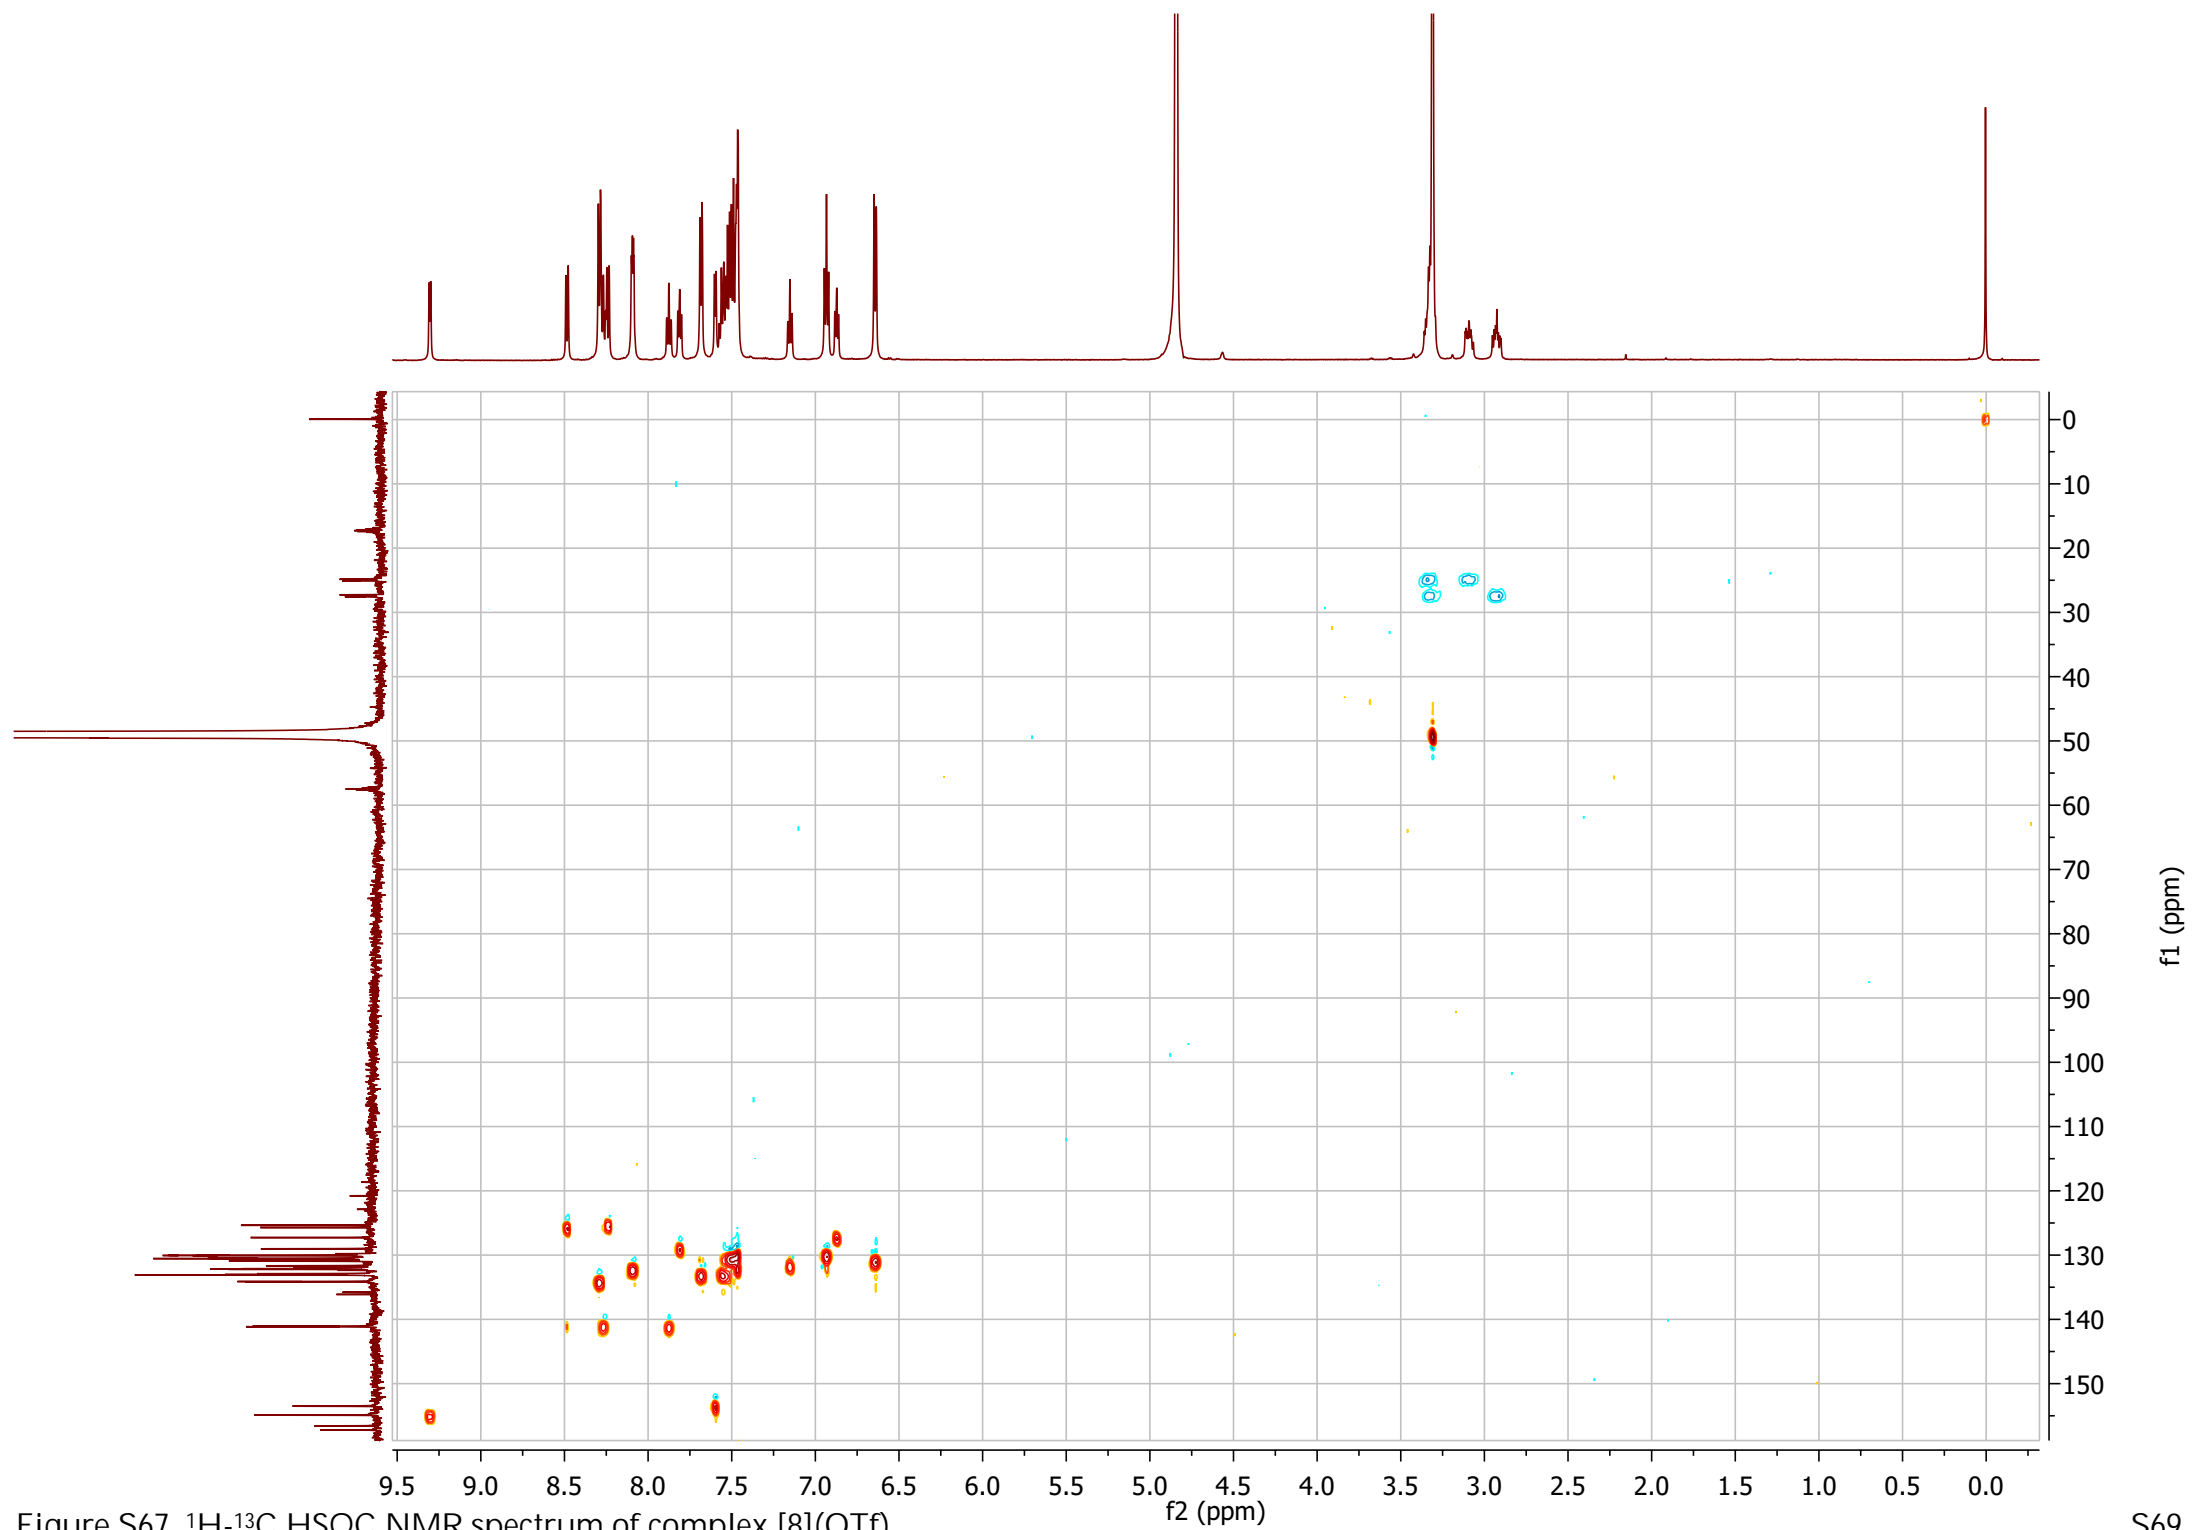

Figure S67.  $^1\text{H}$ - $^{13}\text{C}$  HSQC NMR spectrum of complex  $[8](\text{OTf})$ .

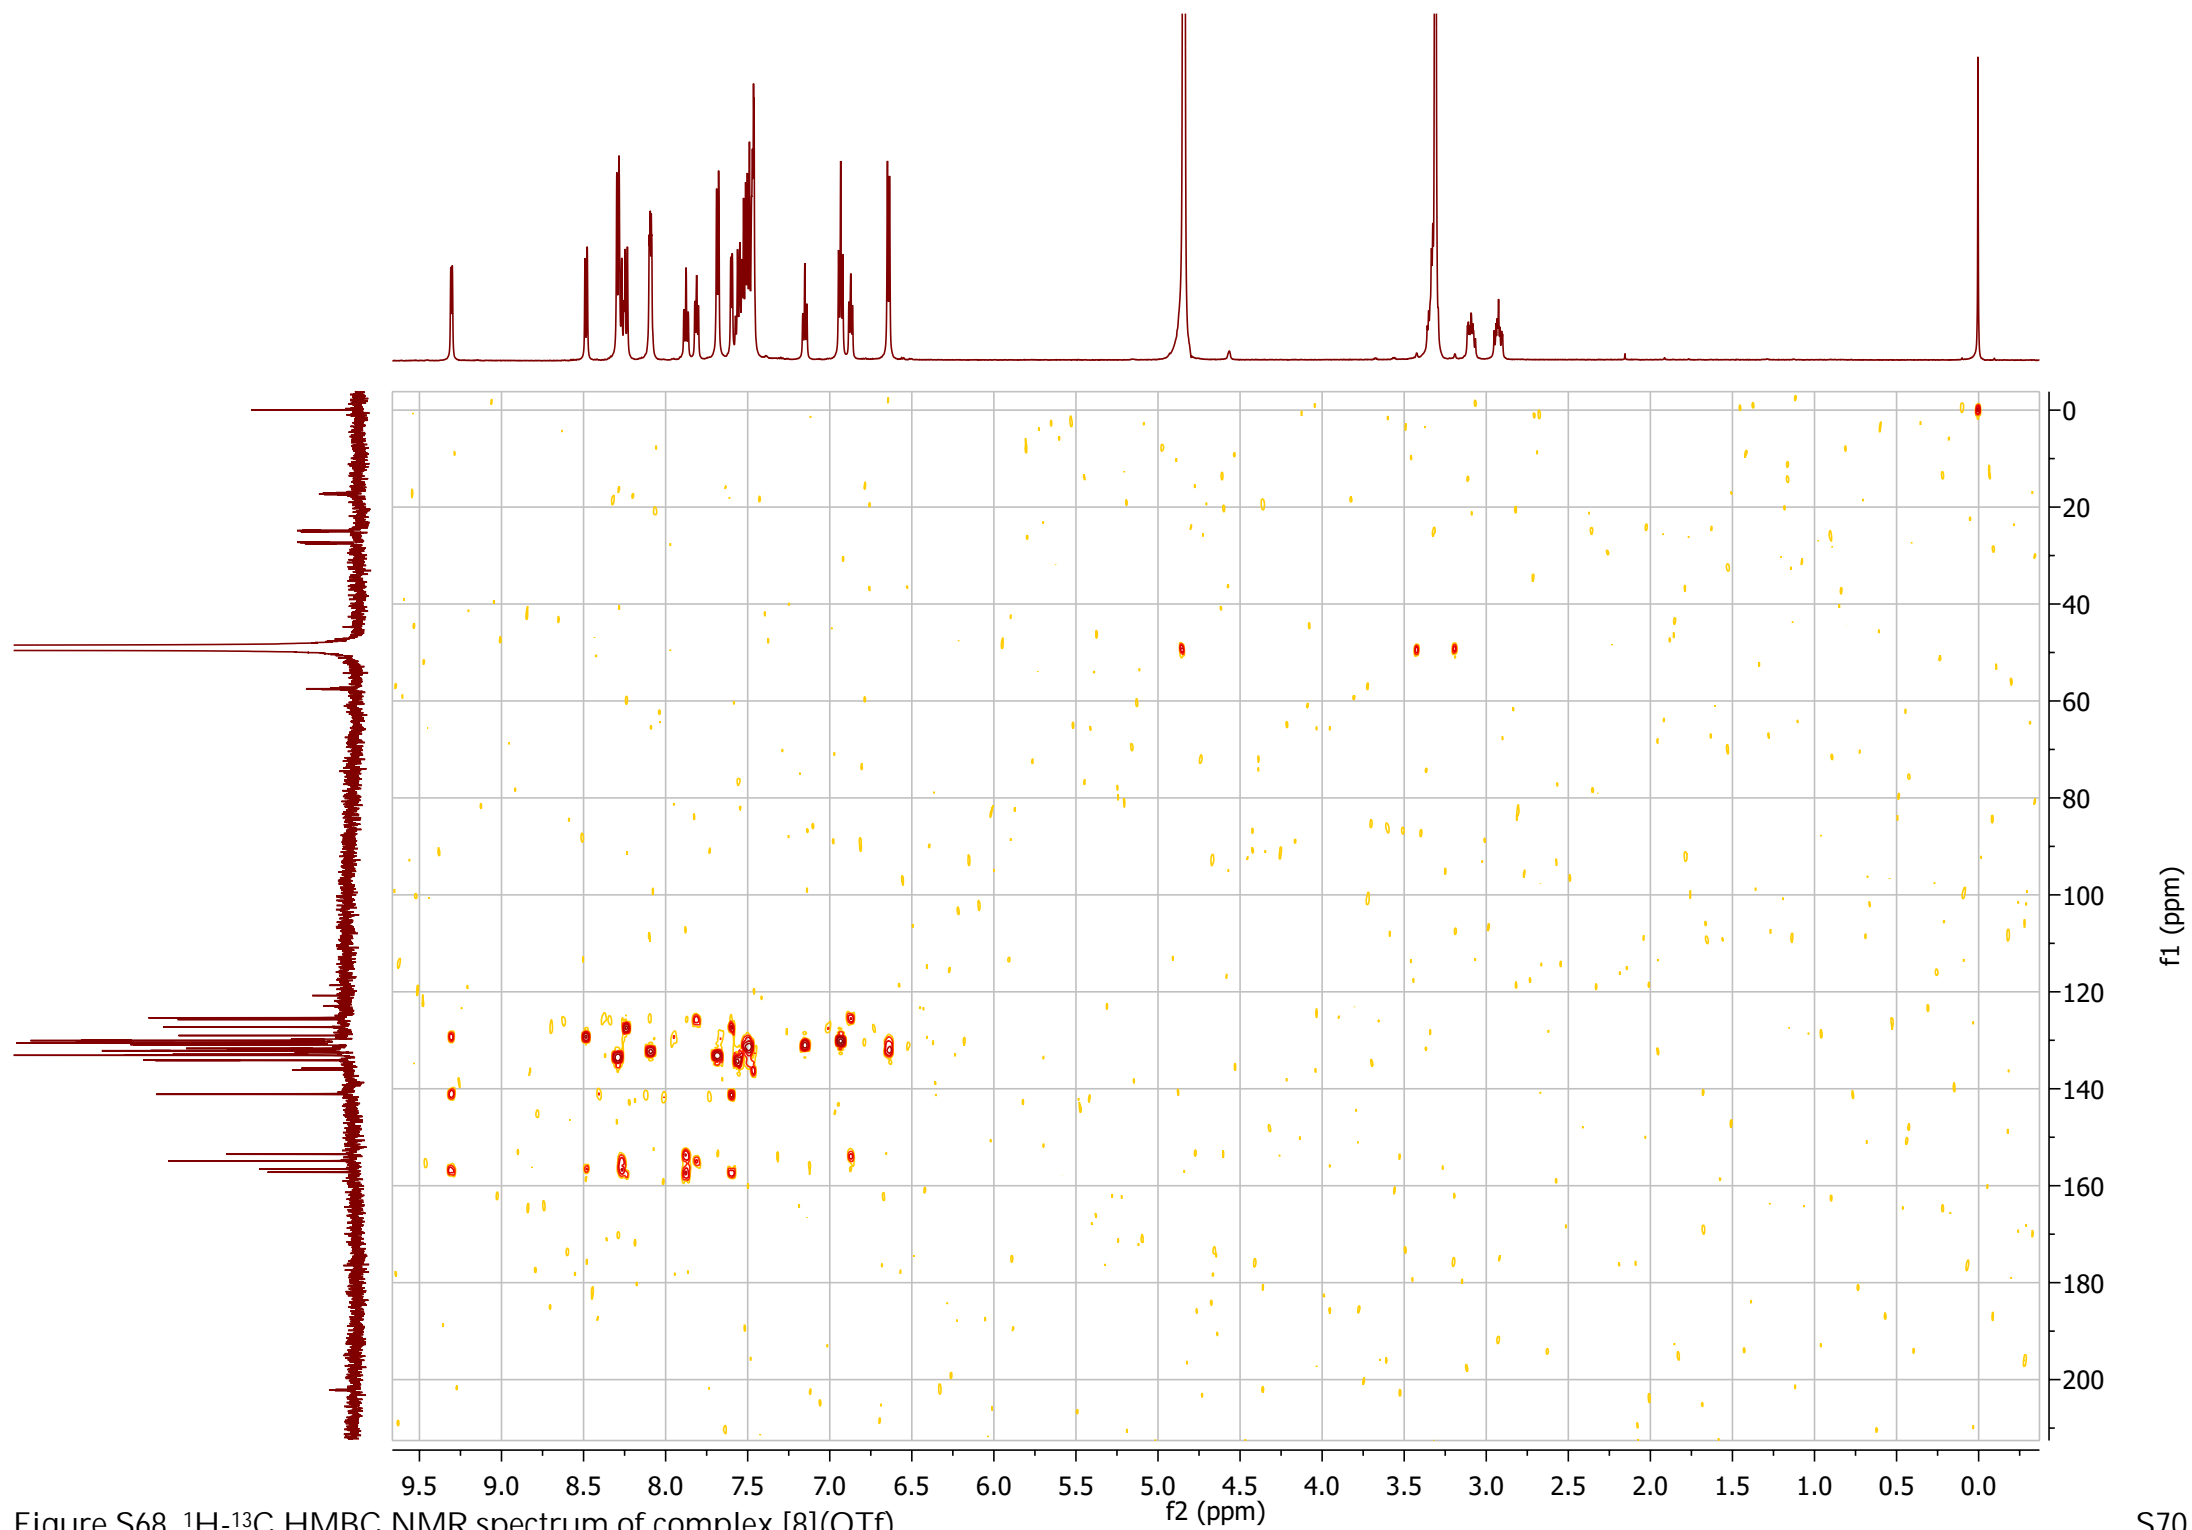

Figure S68.  $^1\text{H}$ - $^{13}\text{C}$  HMBC NMR spectrum of complex  $[8](\text{OTf})$ .

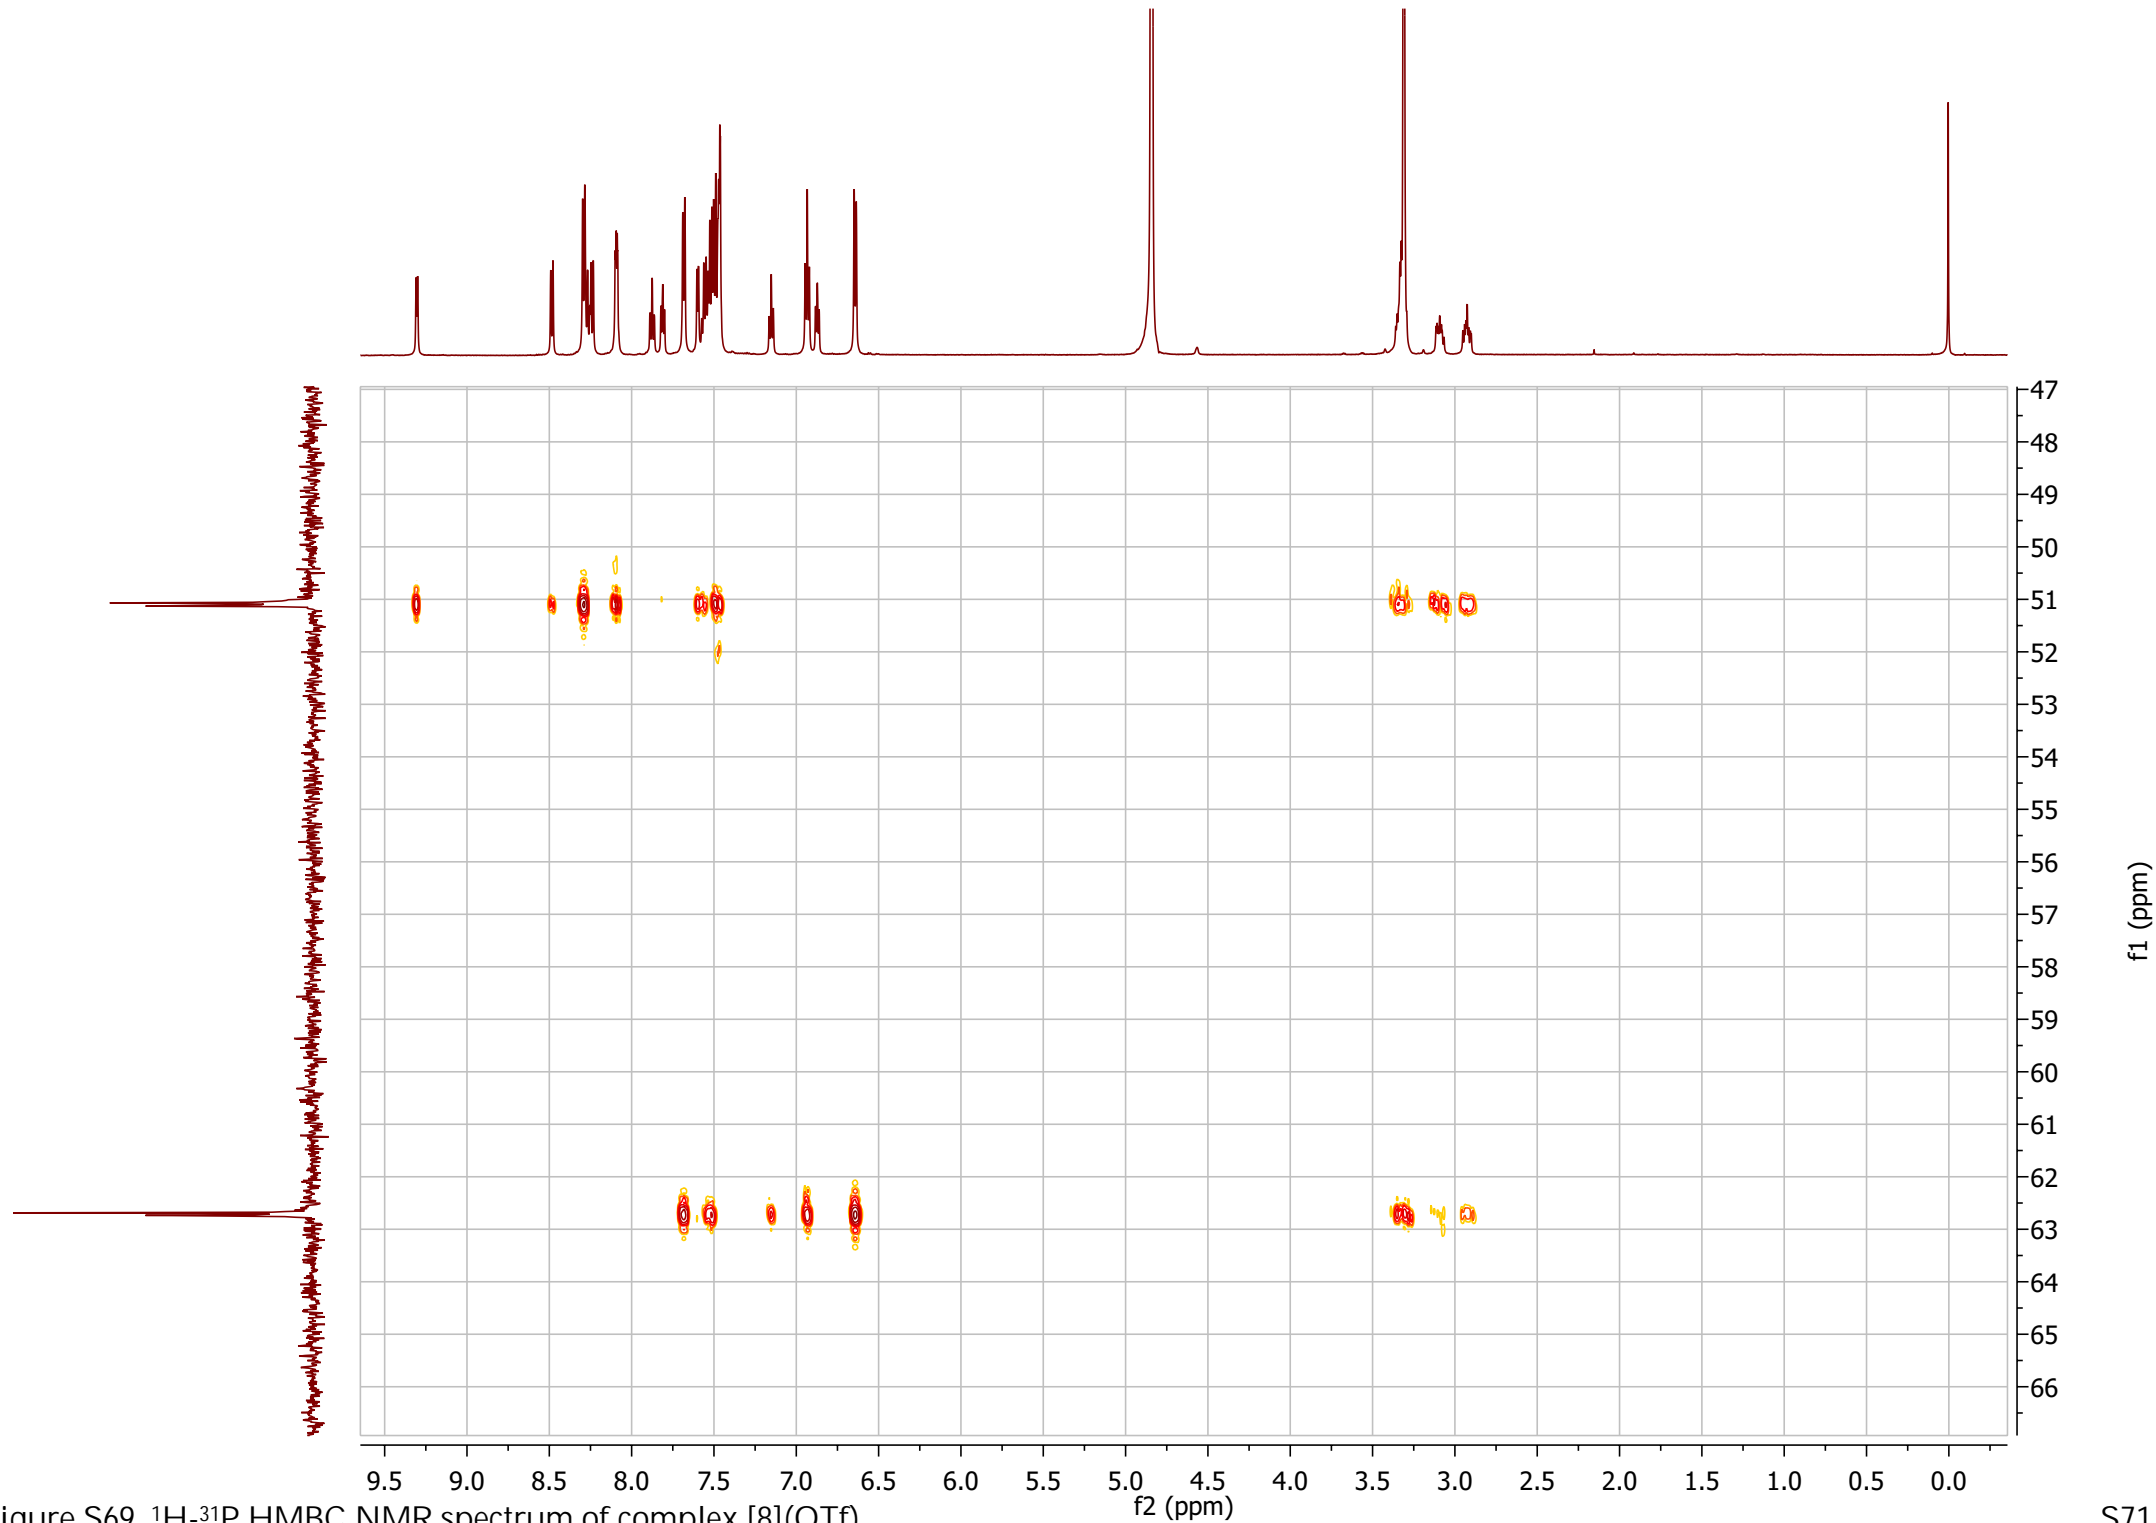

Figure S69.  $^1\text{H}$ - $^{31}\text{P}$  HMBC NMR spectrum of complex  $[8](\text{OTf})$ .

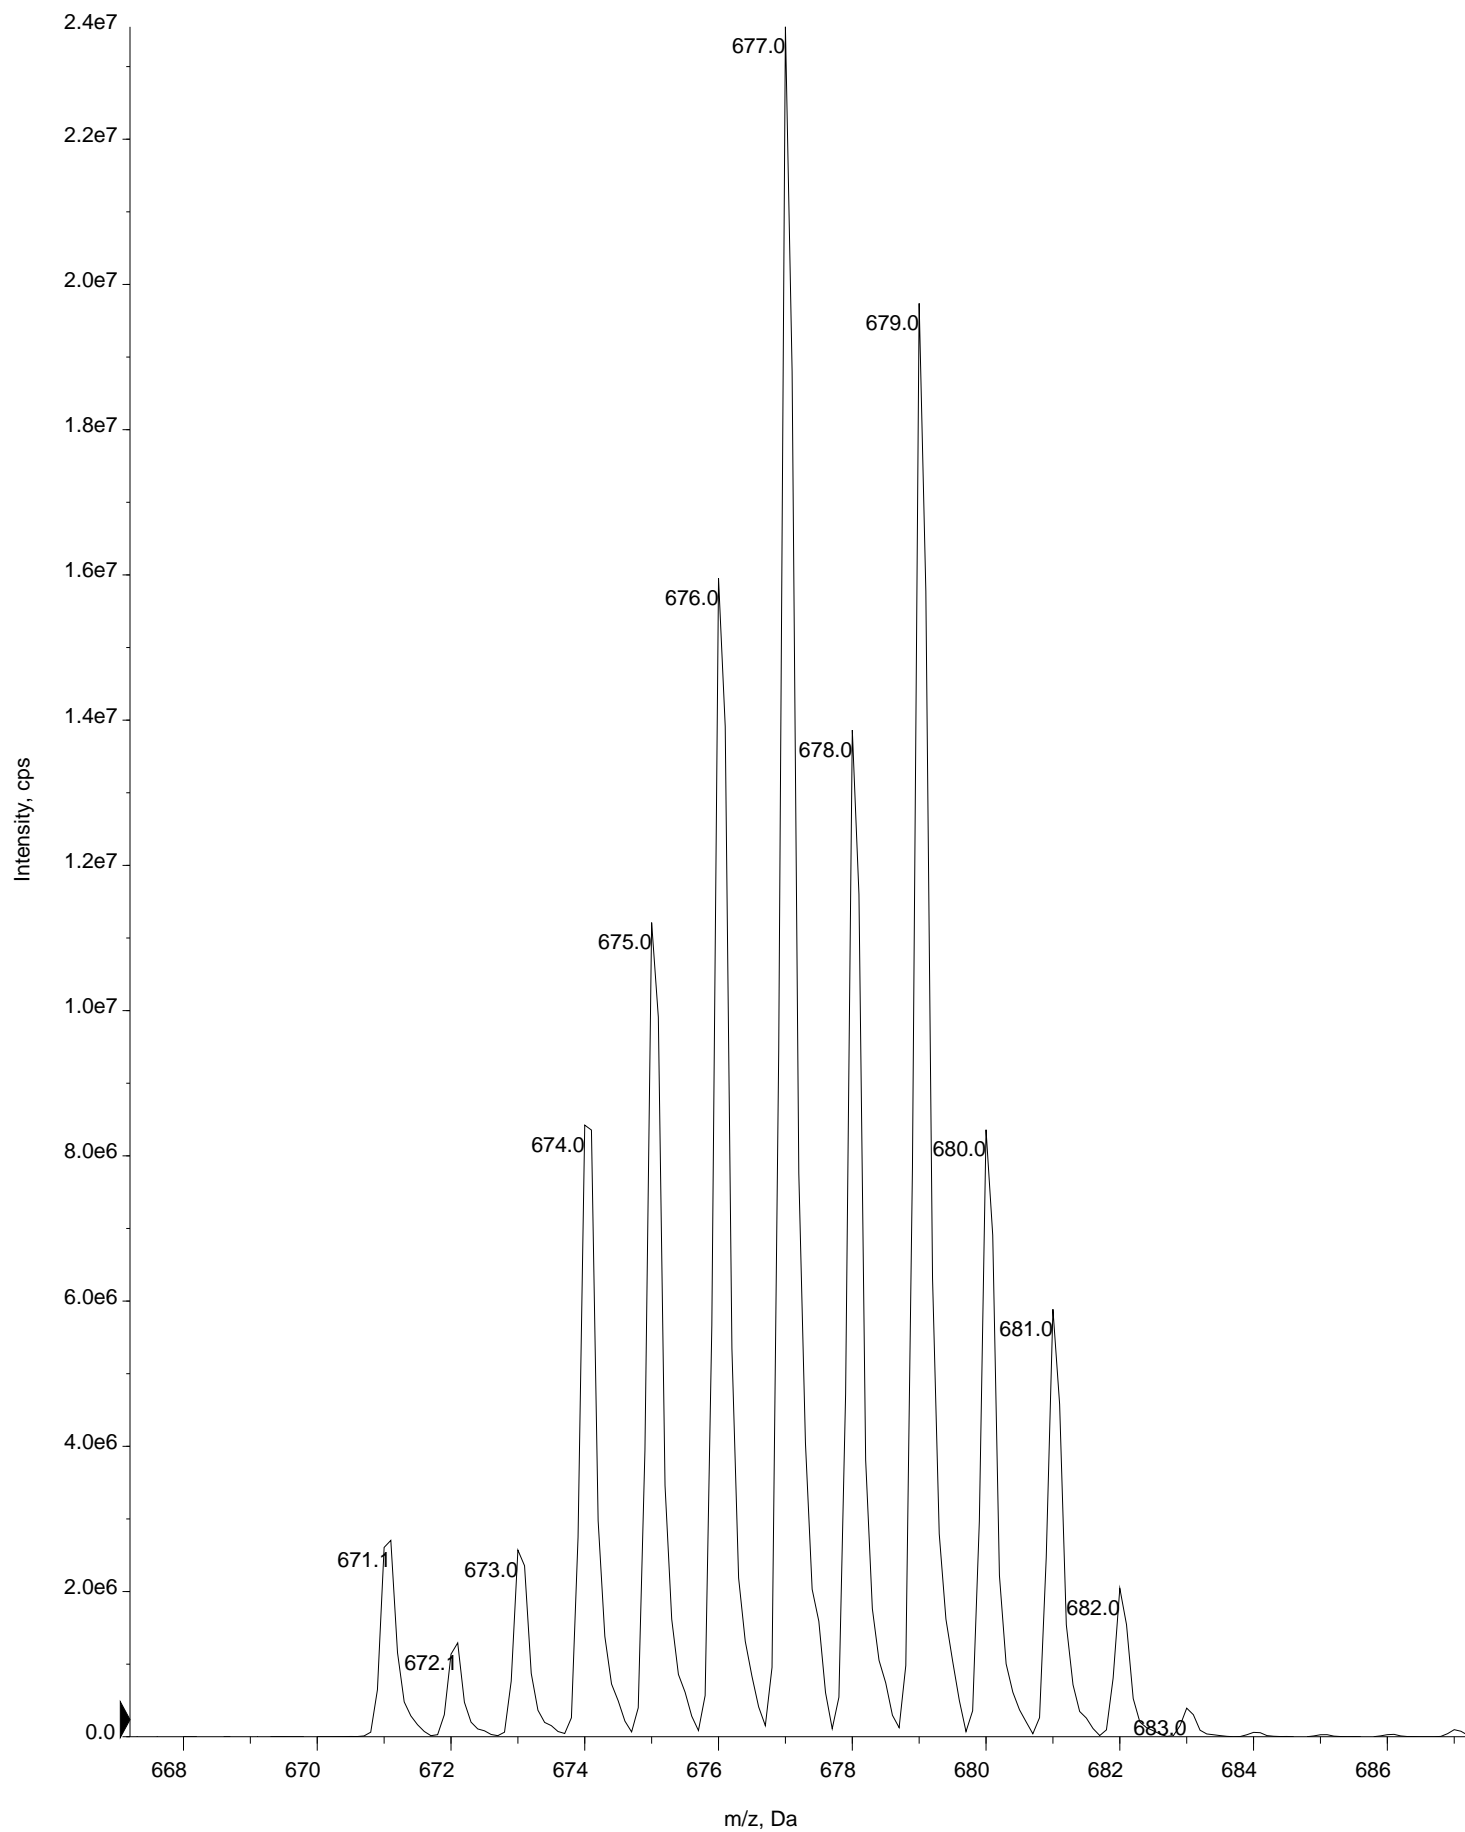

Figure S70. Experimental ESI mass spectrum of  $[1\text{-Cl}]^+$  in methanol (positive mode).

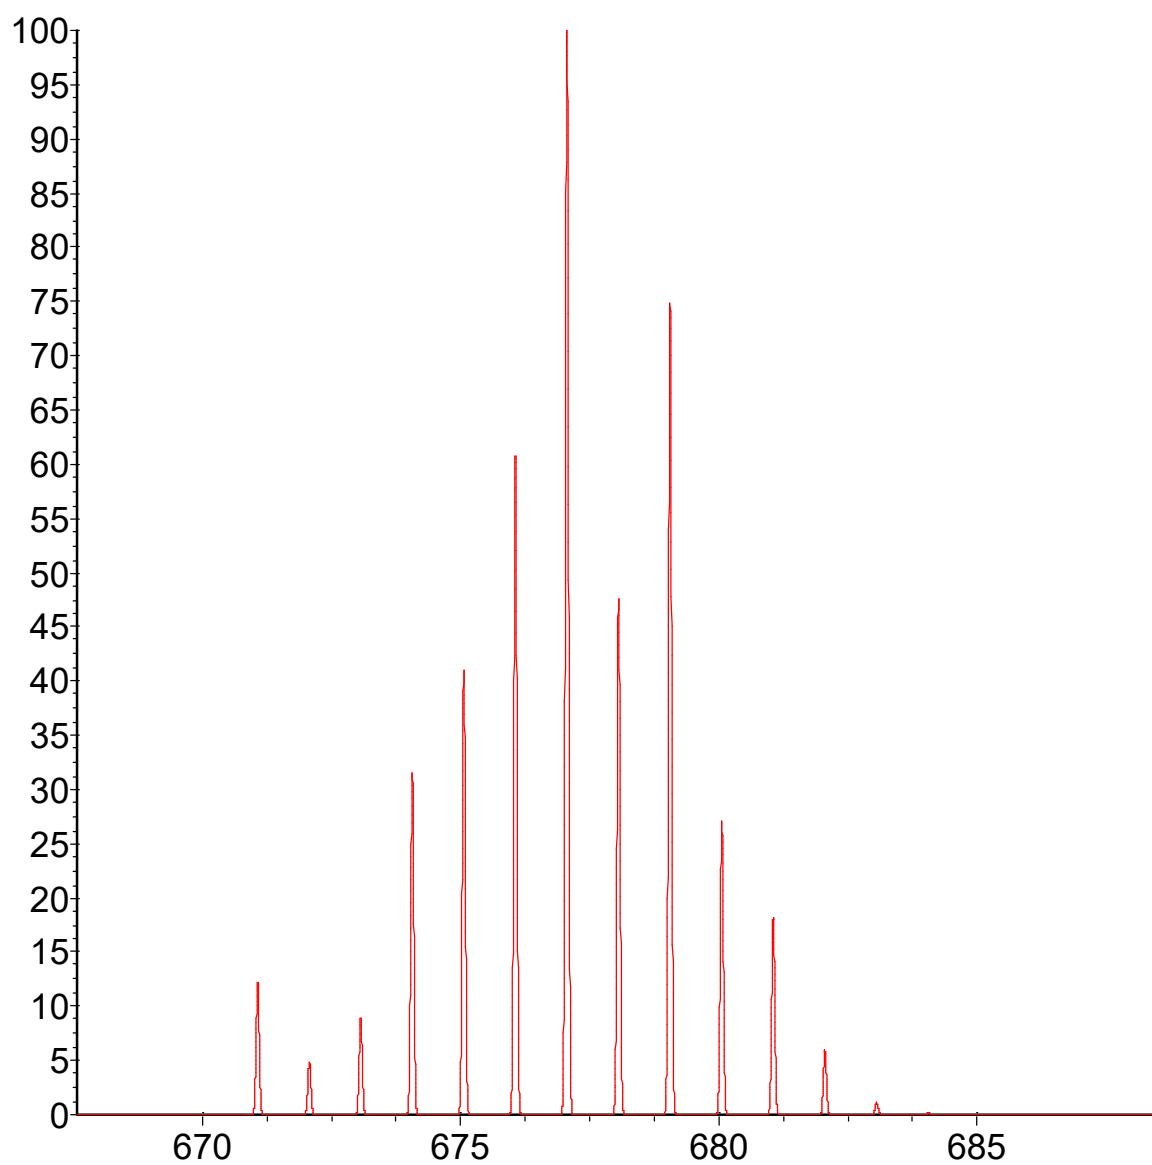

Figure S71. Simulated isotopic distribution pattern of  $[1\text{-Cl}]^+$ .

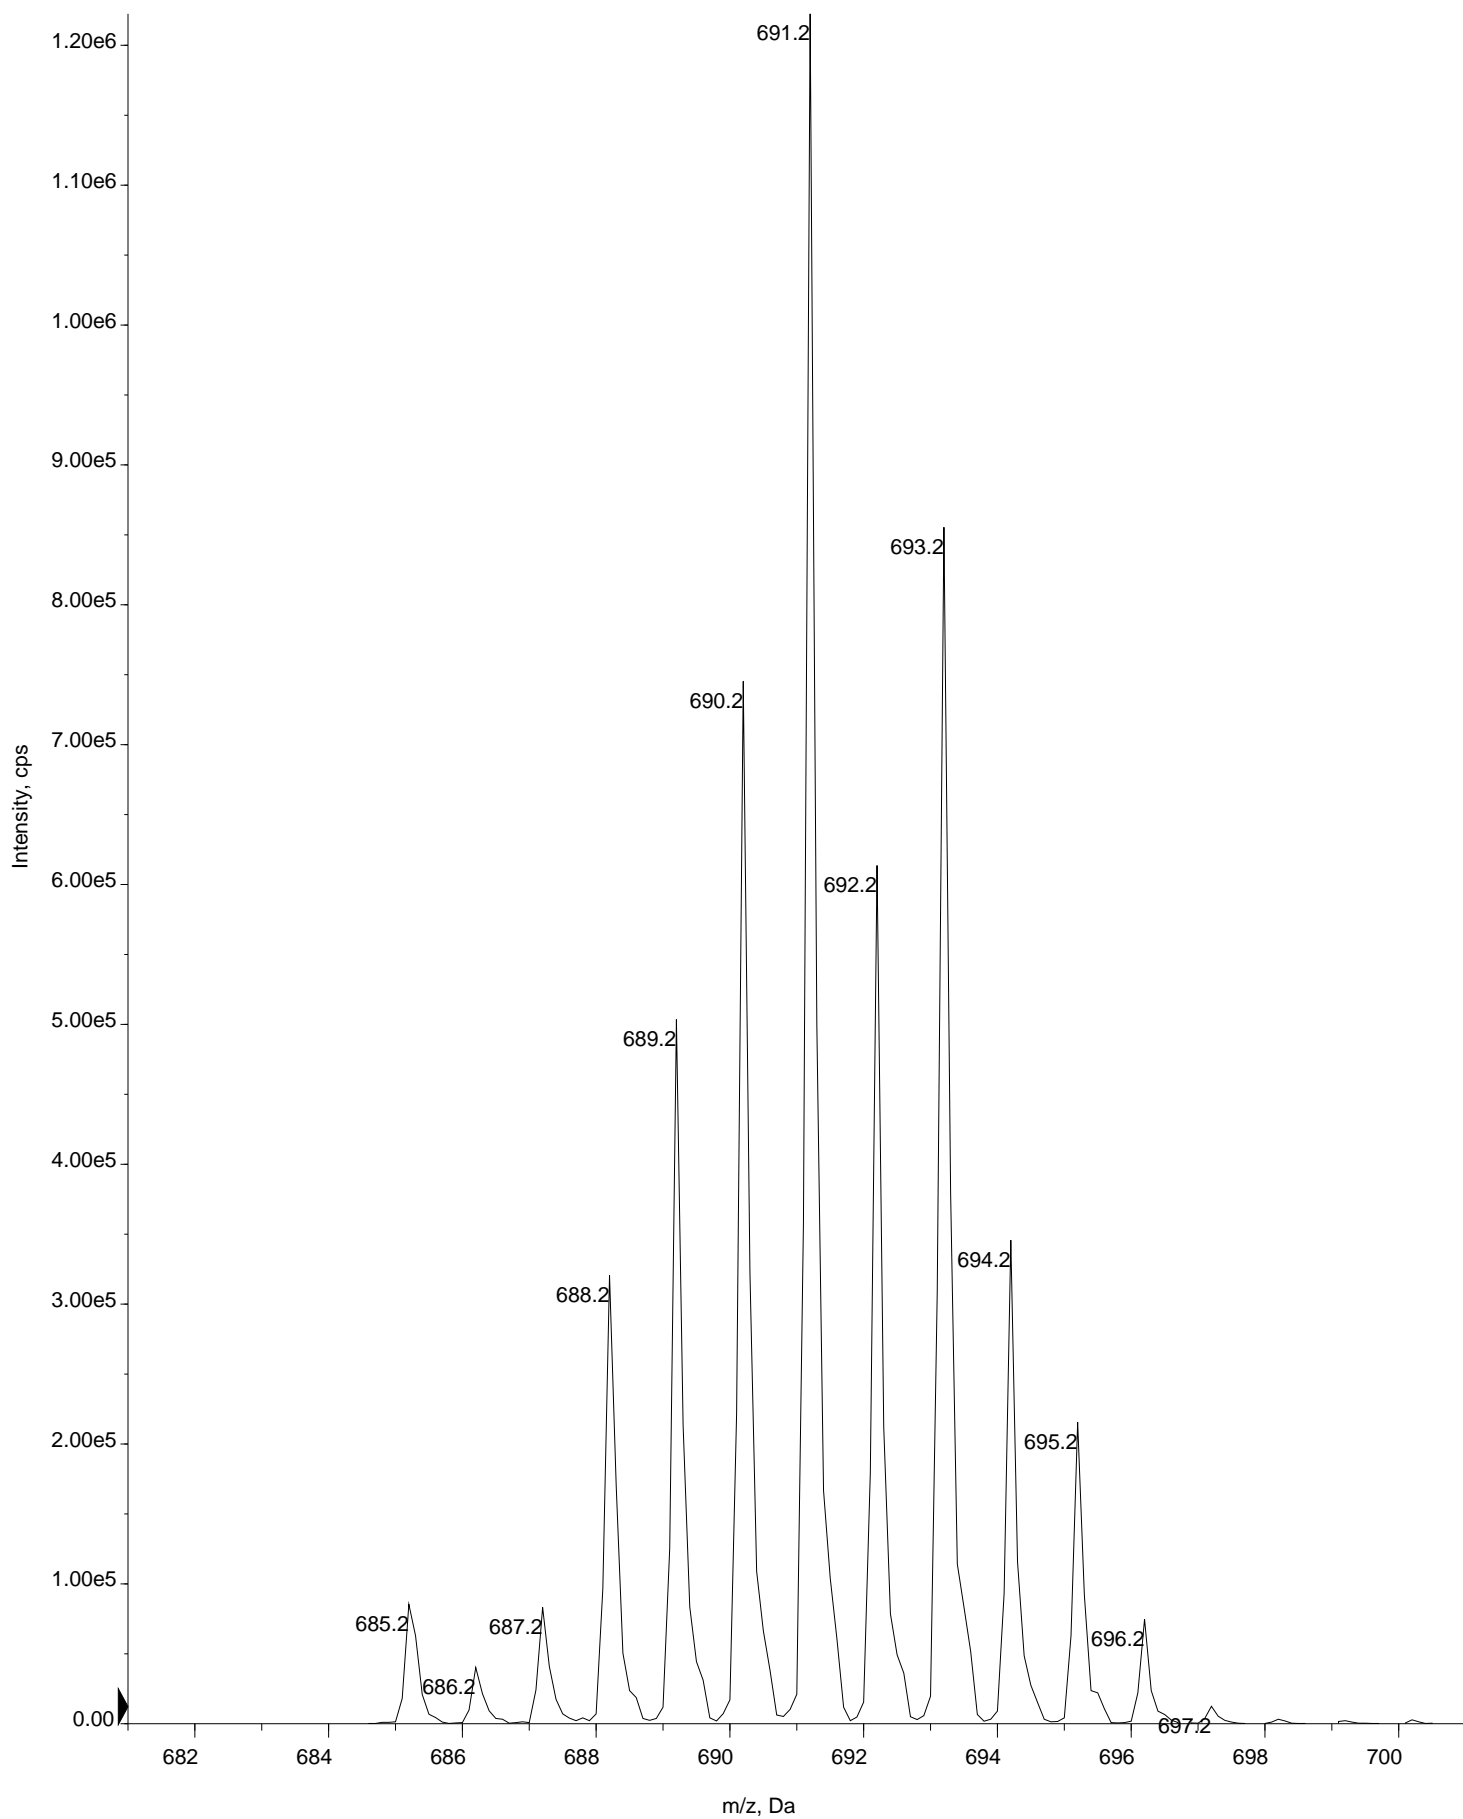

Figure S72. Experimental ESI mass spectrum of  $[2\text{-Cl}]^+$  in methanol (positive mode).

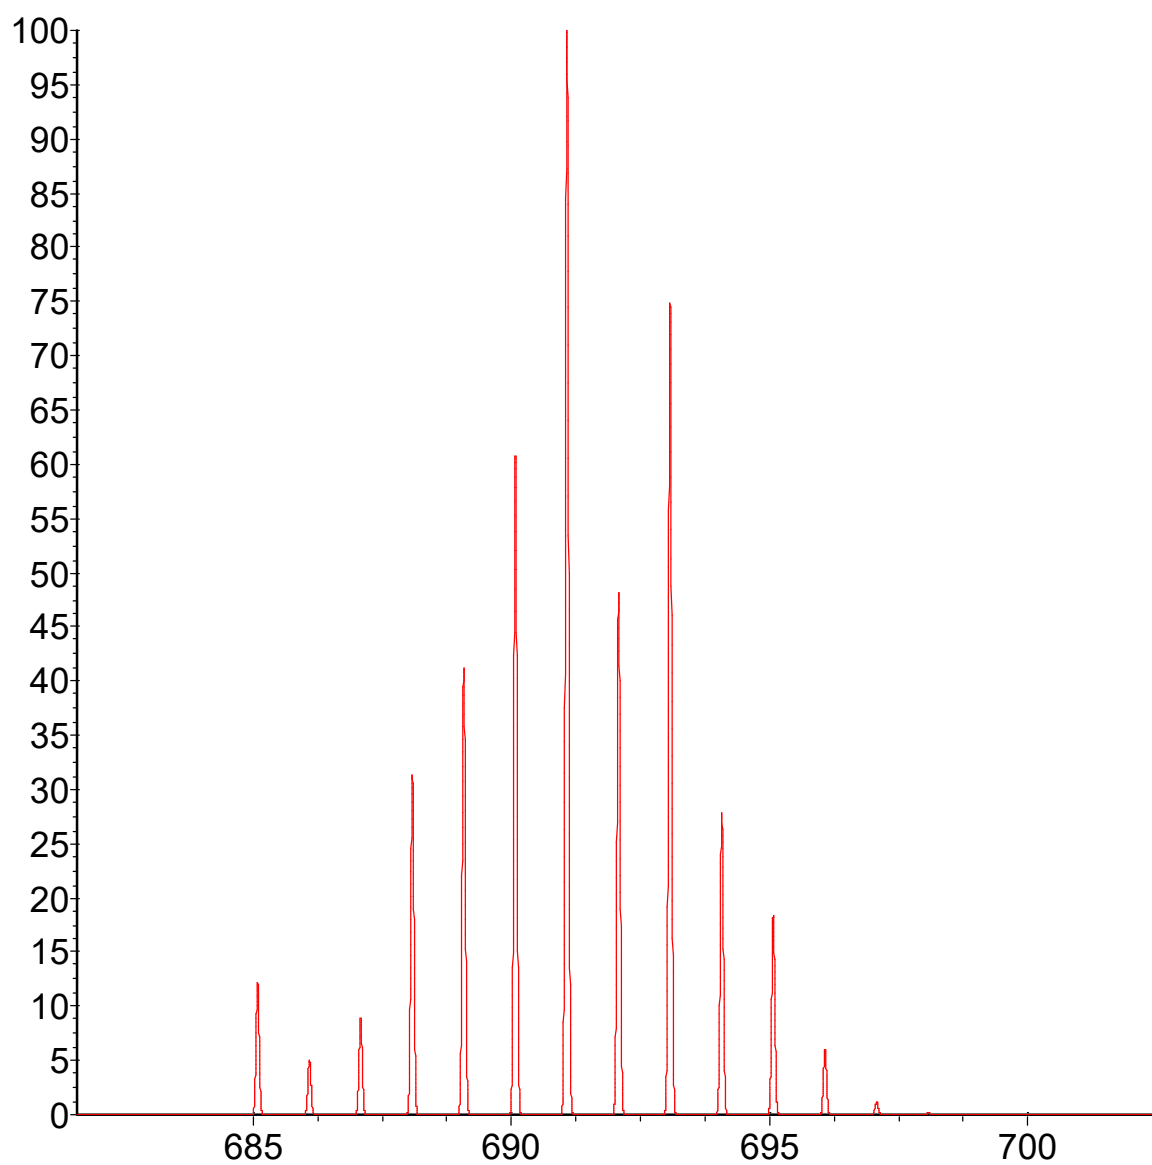

Figure S73. Simulated isotopic distribution pattern of  $[2\text{-Cl}]^+$ .

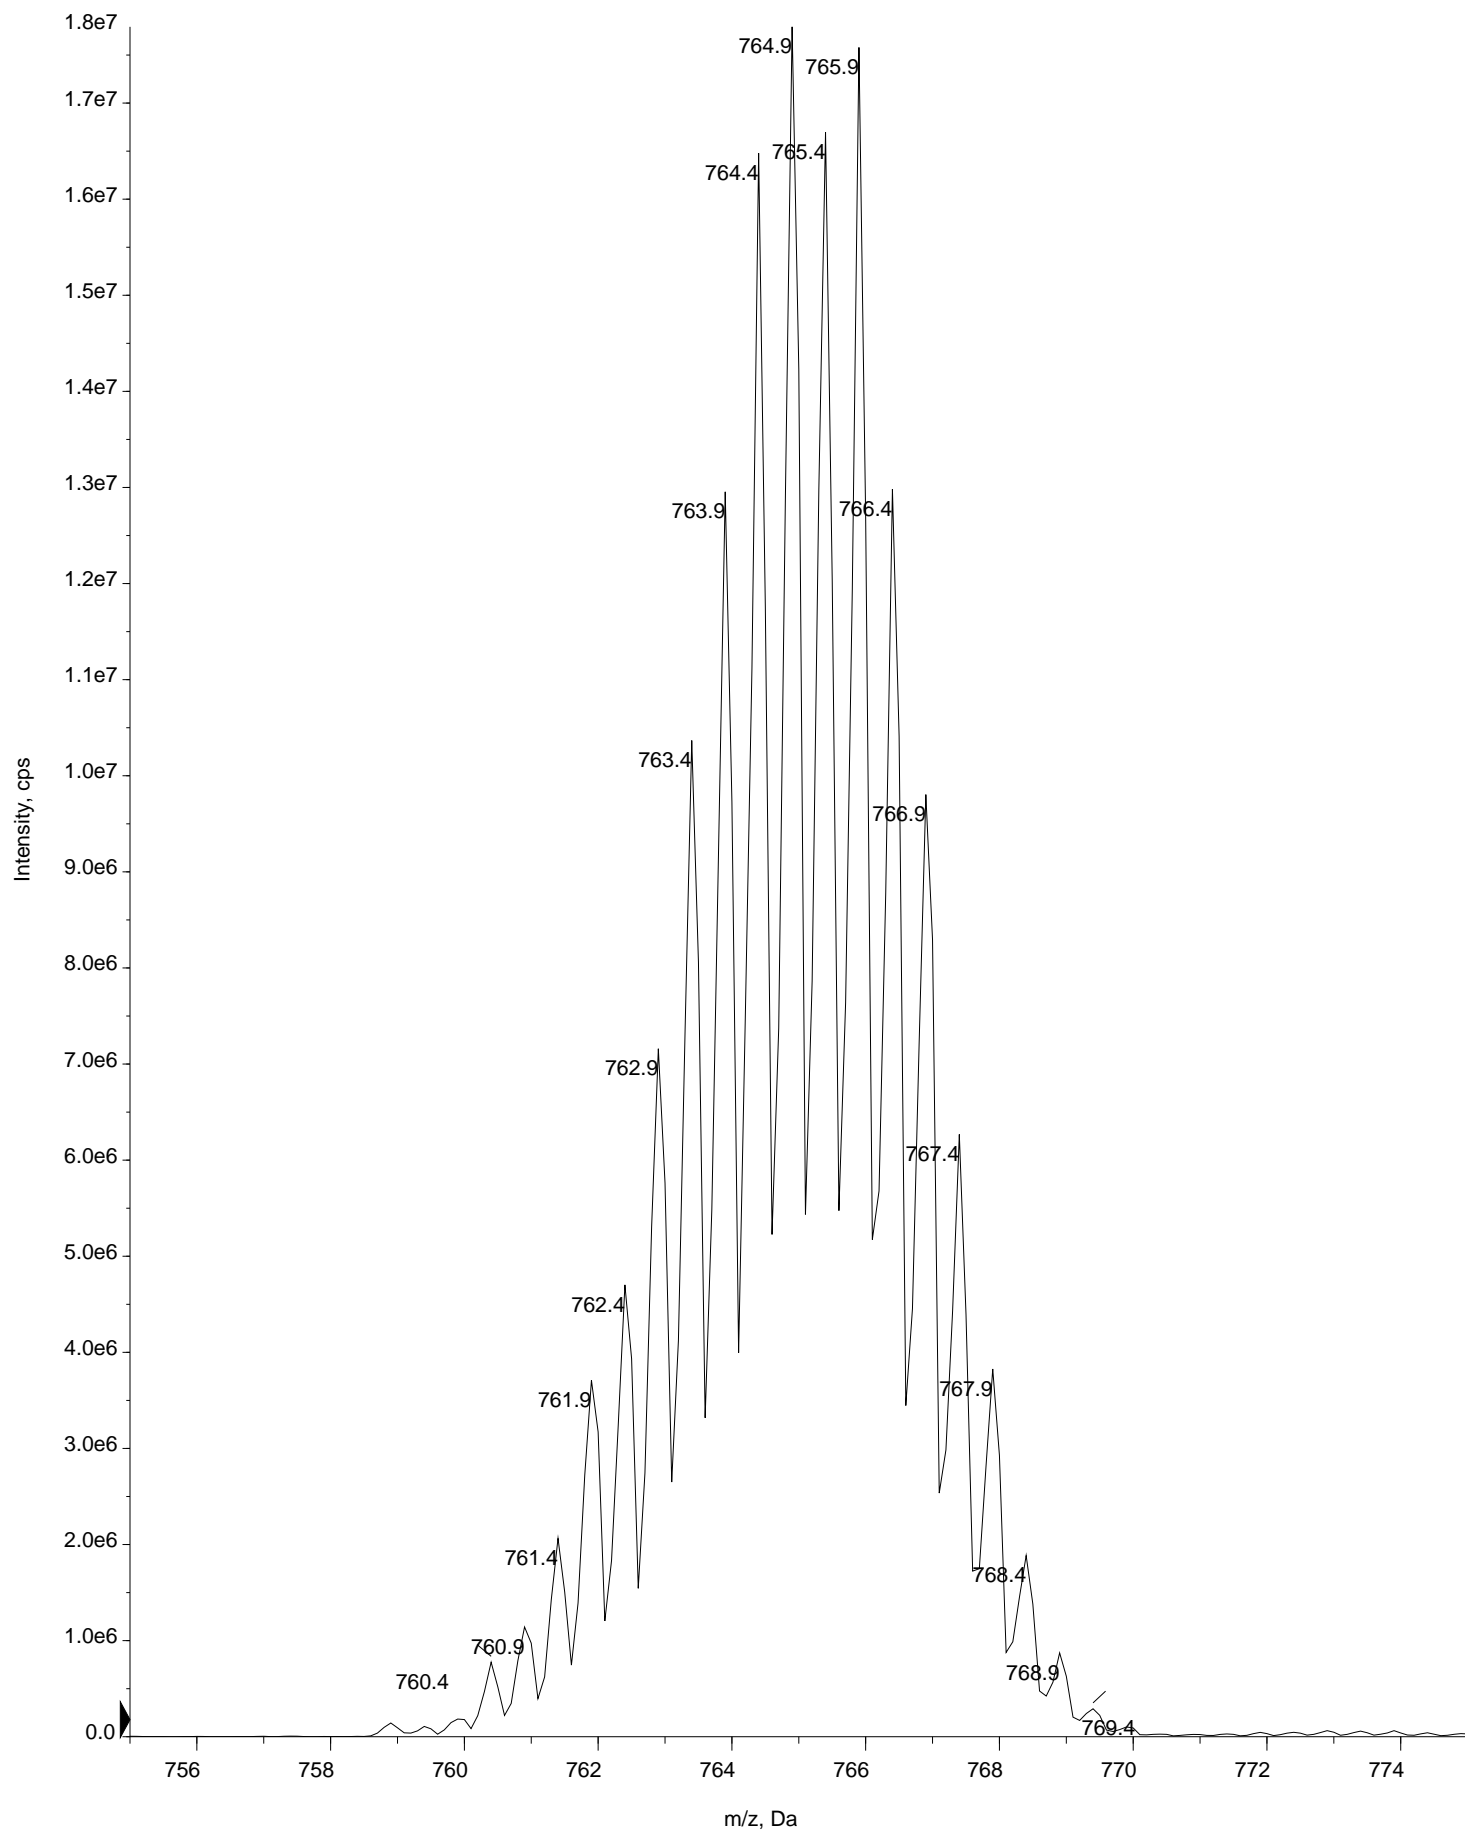

Figure S74. Experimental ESI mass spectrum of  $[3]^{2+}$  in methanol (positive mode).



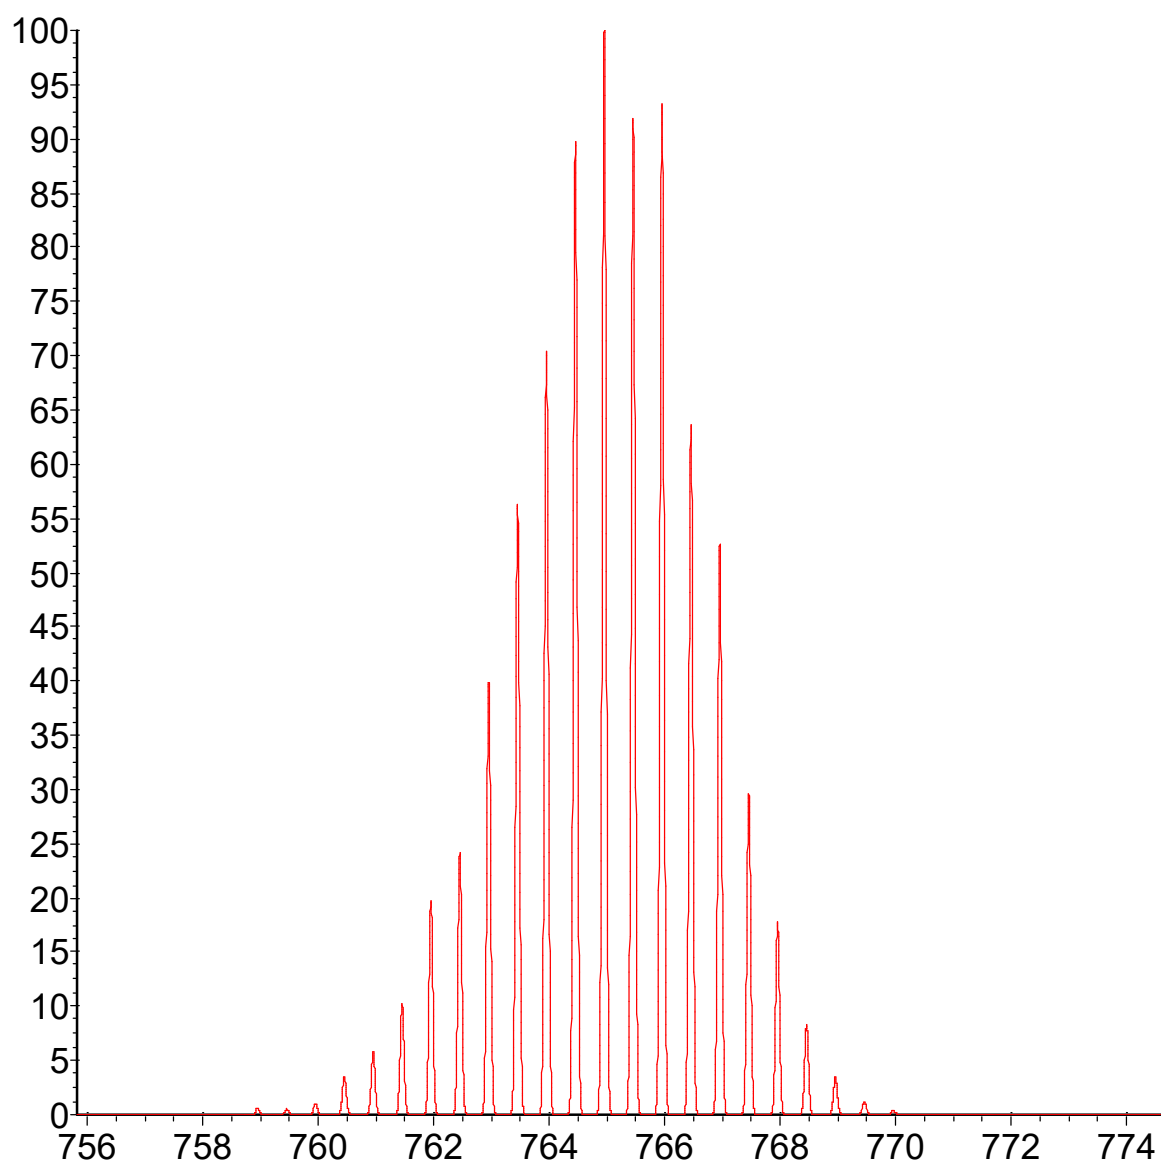

Figure S75. Simulated isotopic distribution pattern of  $[3]^{2+}$ .

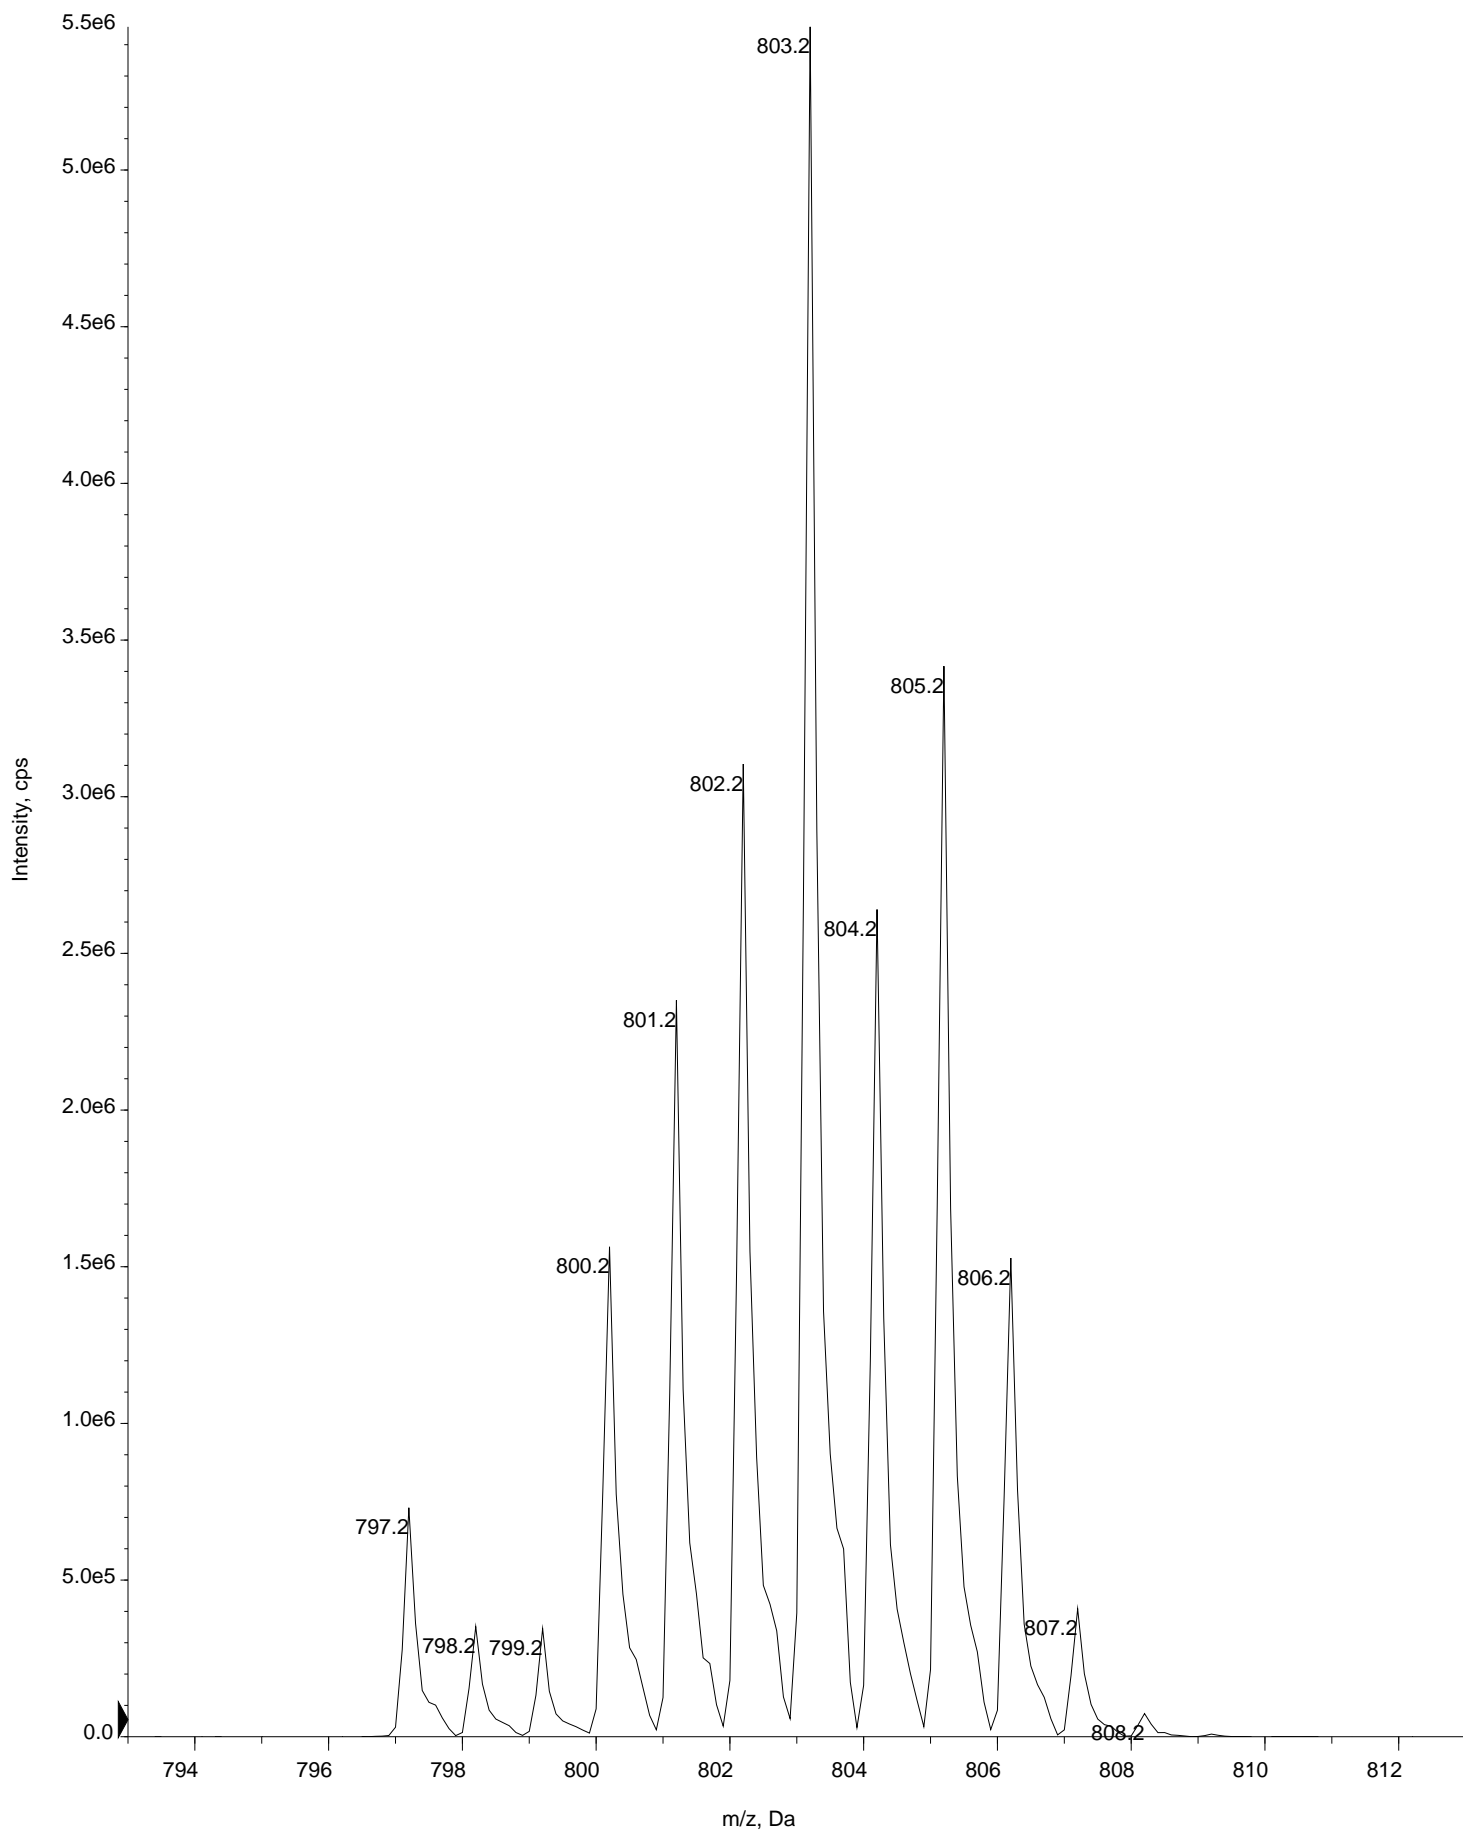

Figure S76. Experimental ESI mass spectrum of [4]<sup>+</sup> in methanol (positive mode).

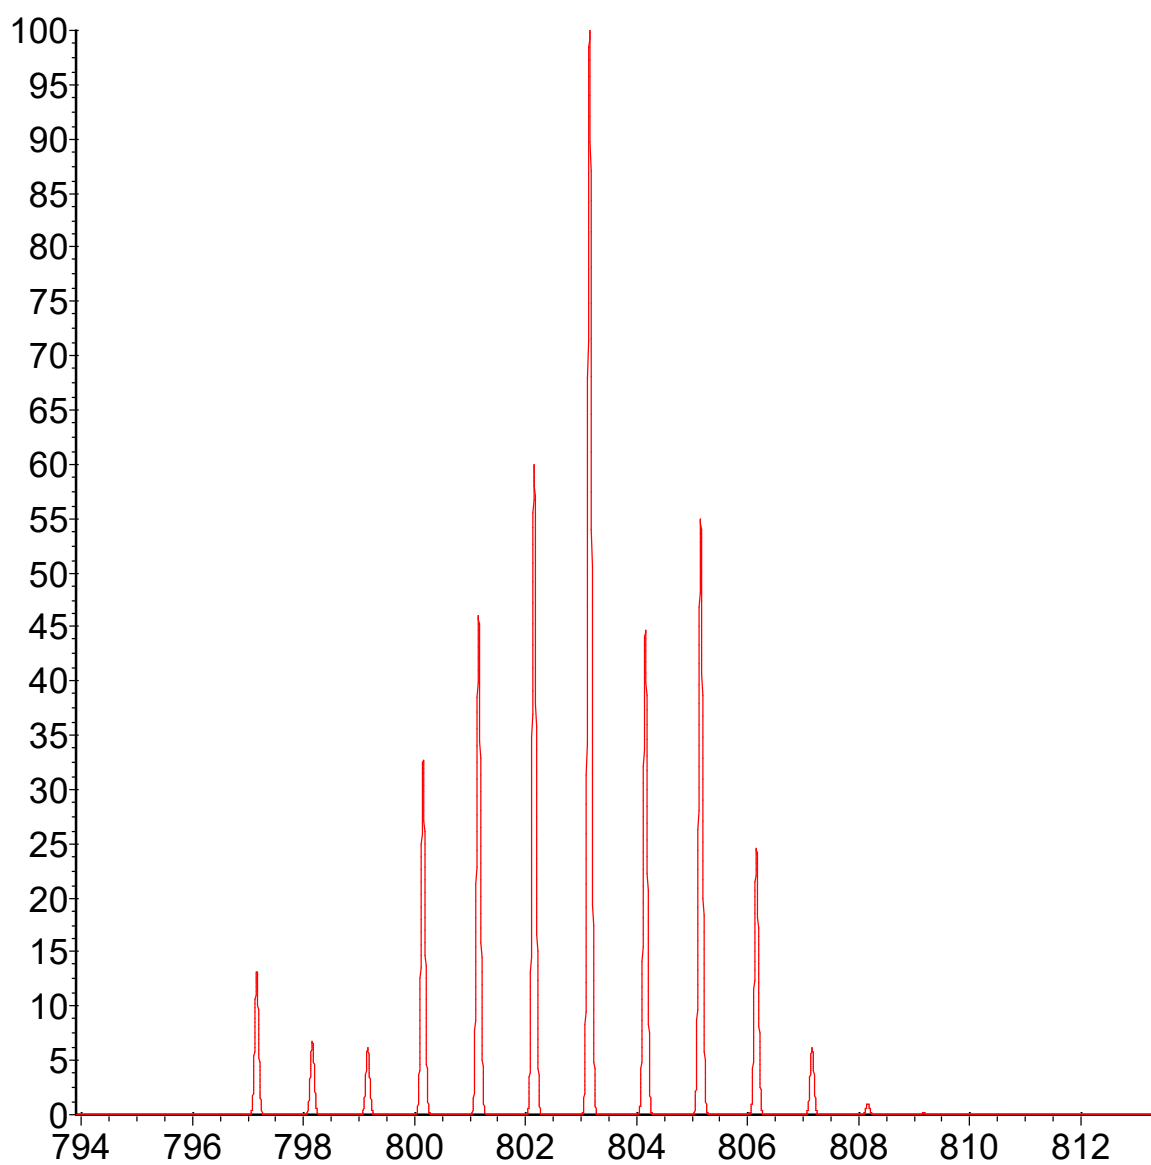

Figure S77. Simulated isotopic distribution pattern of [4]<sup>+</sup>.

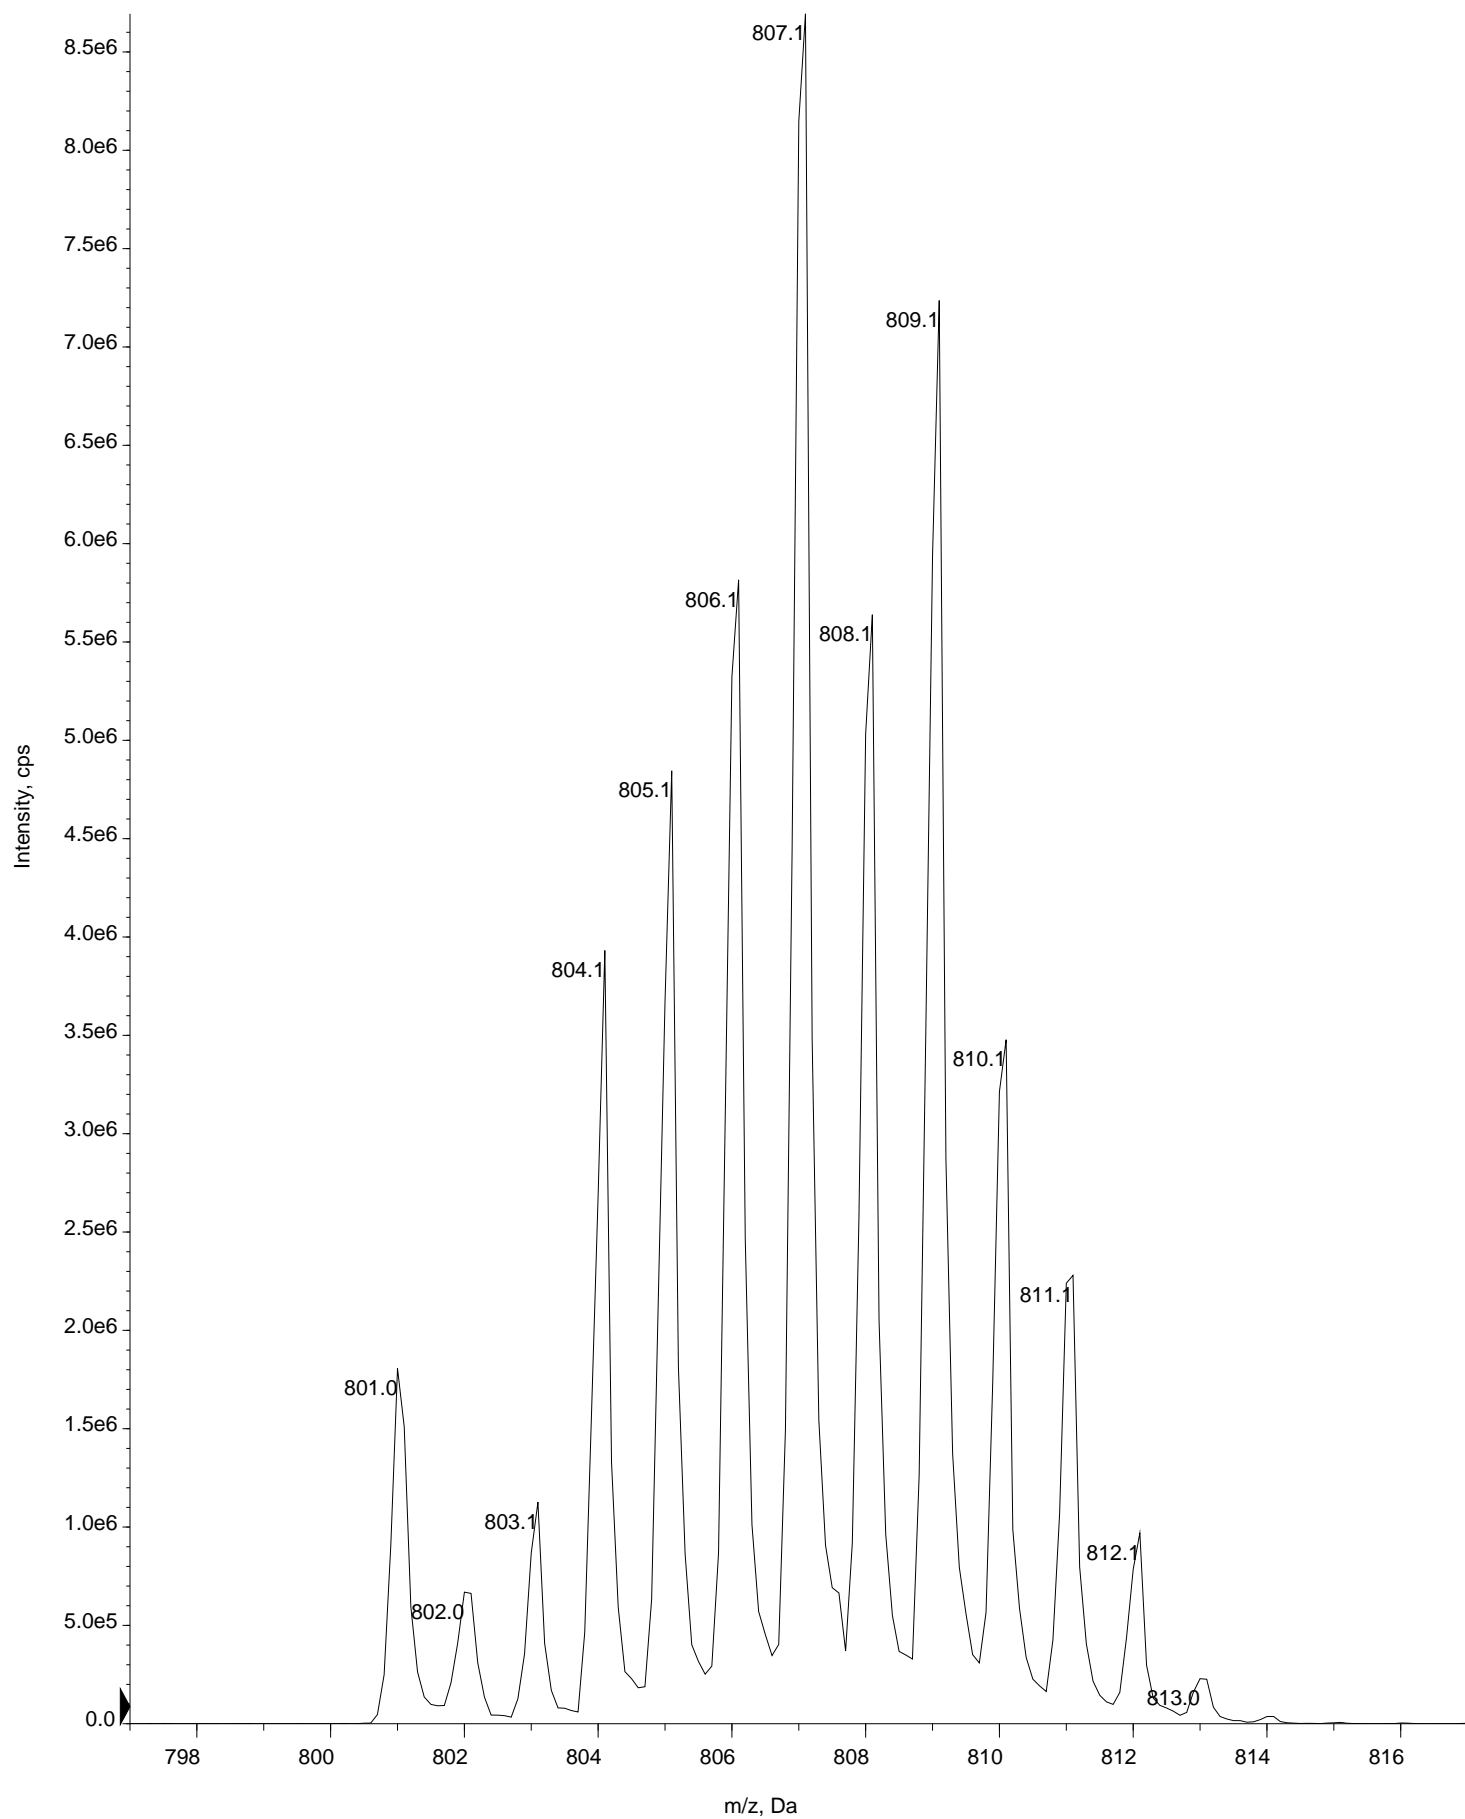

Figure S78. Experimental ESI mass spectrum of  $[5]^+$  in methanol (positive mode).

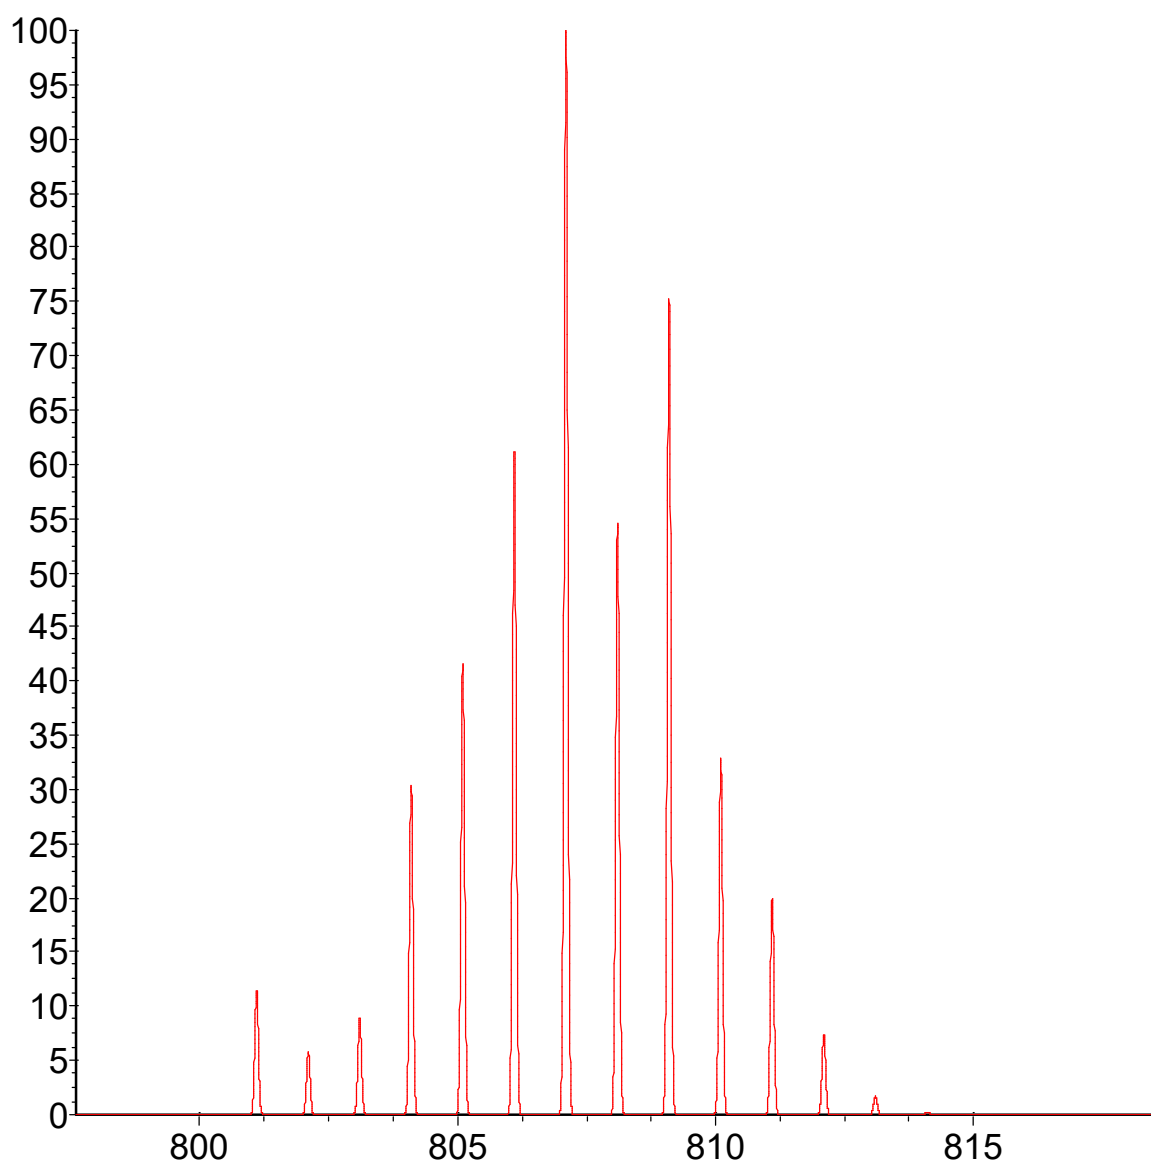

Figure S79. Simulated isotopic distribution pattern of  $[5]^+$ .

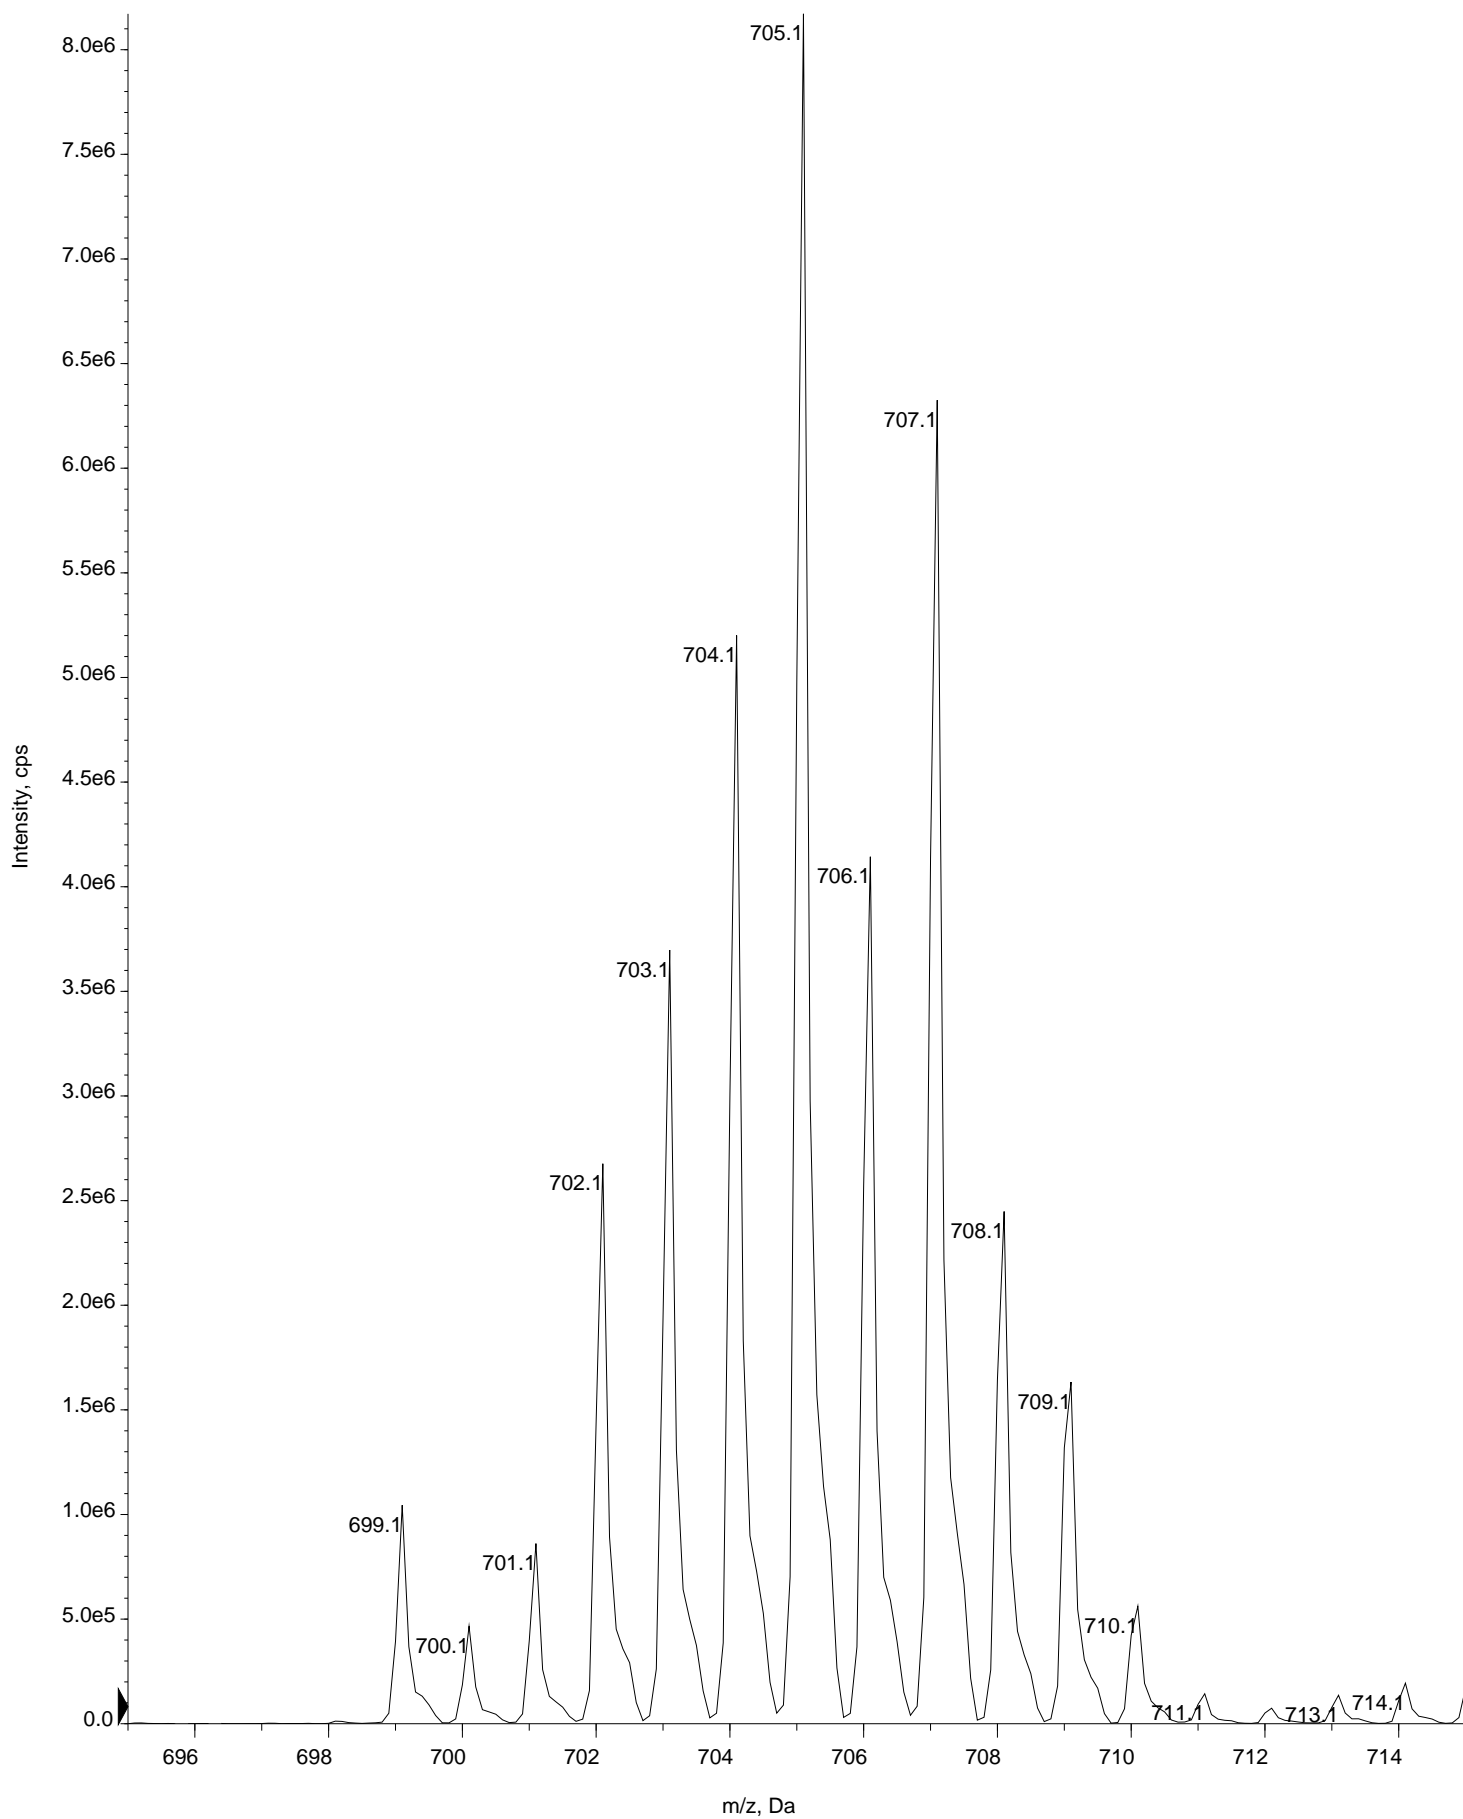

Figure S80. Experimental ESI mass spectrum of  $[6]^+$  in methanol (positive mode).

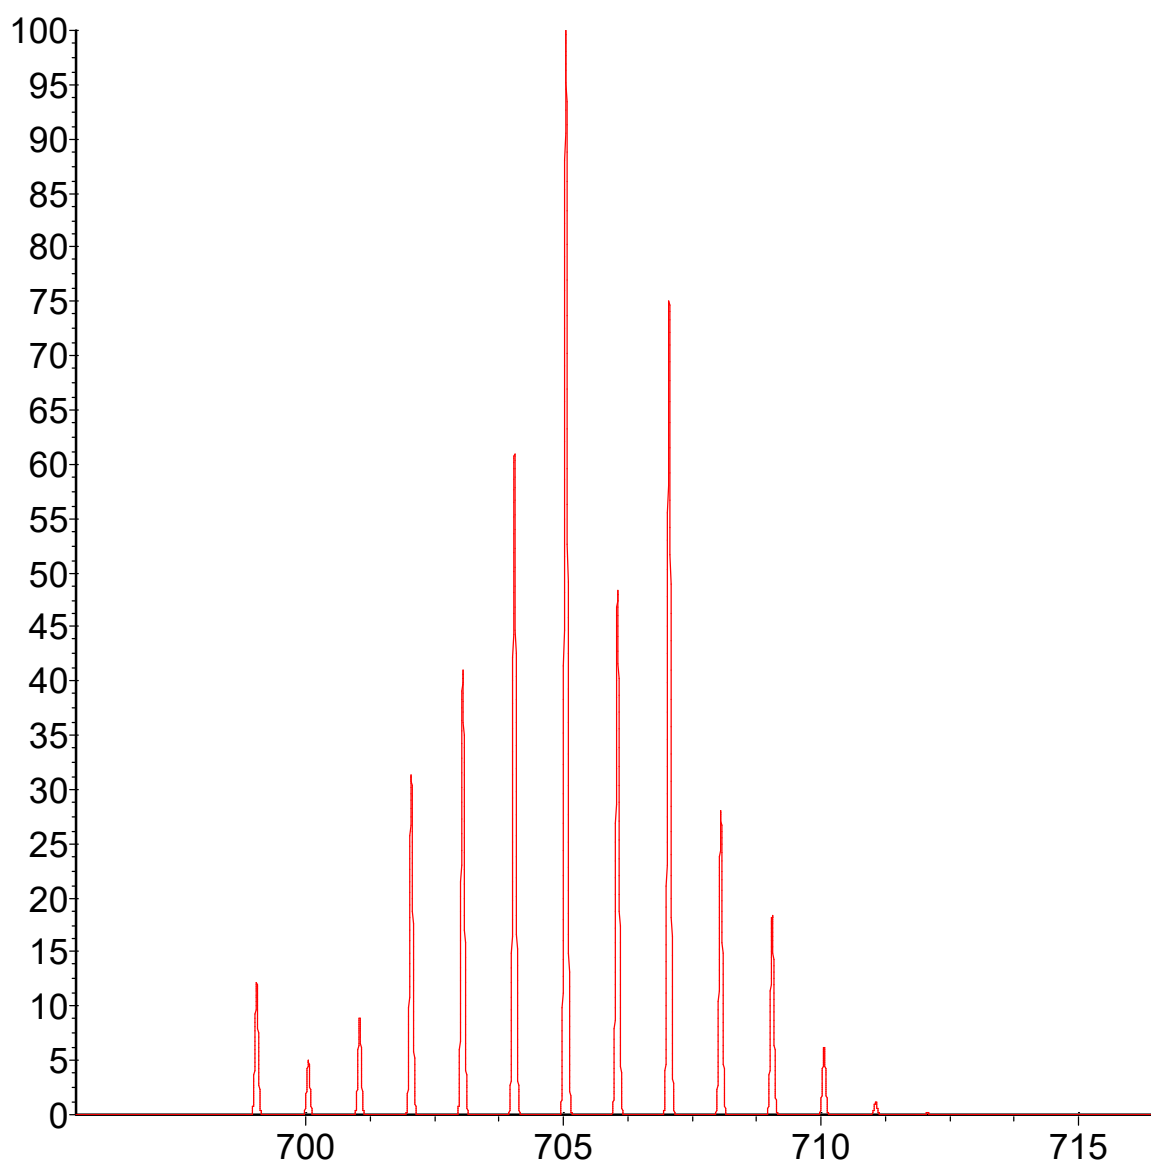

Figure S81. Simulated isotopic distribution pattern of  $[6]^+$ .

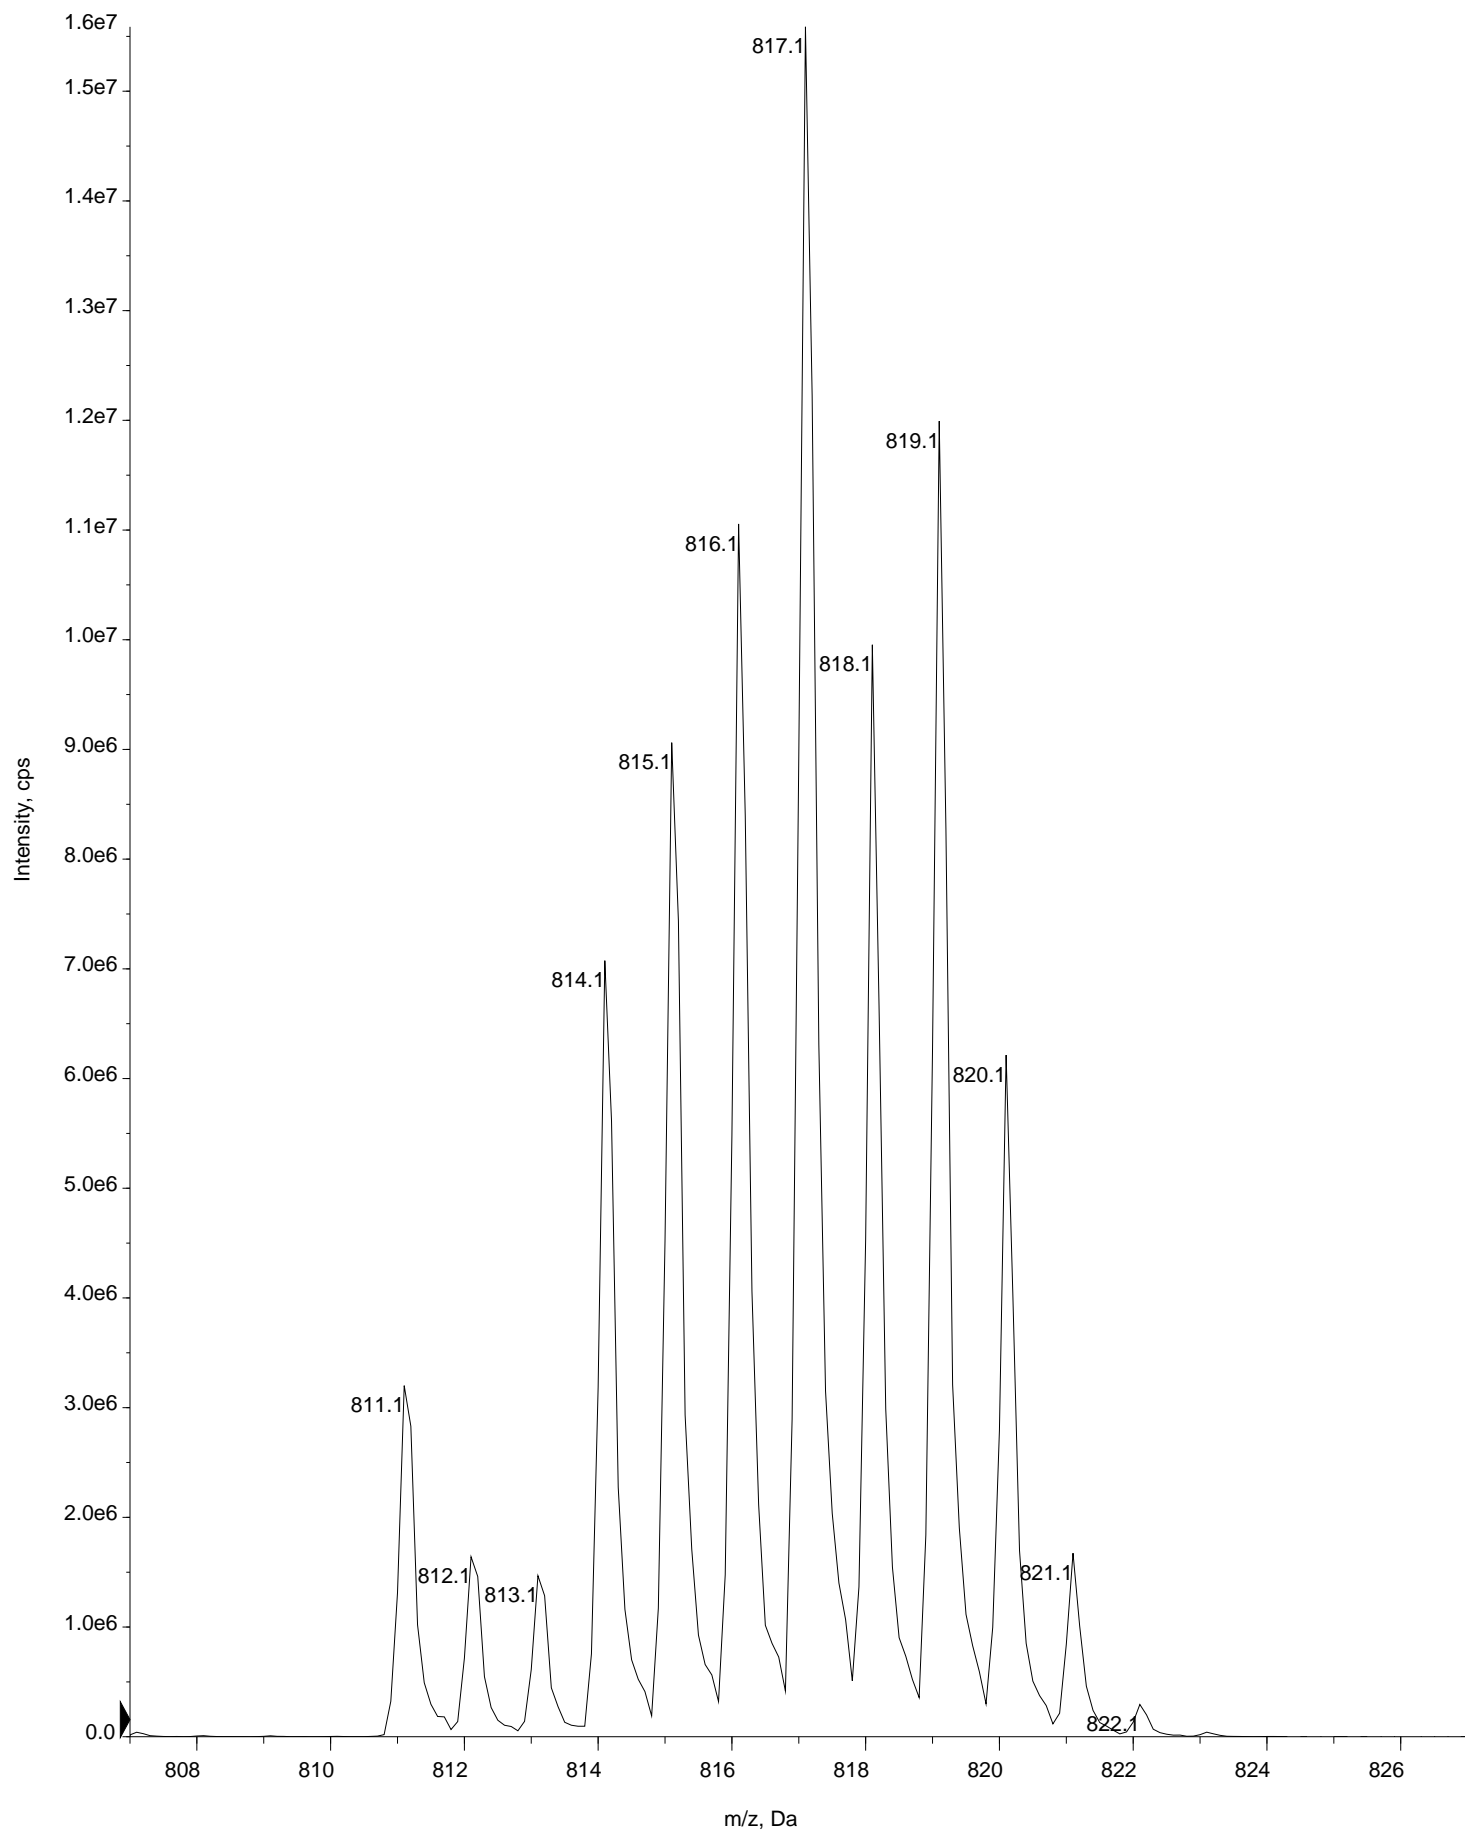

Figure S82. Experimental ESI mass spectrum of  $[7]^+$  in methanol (positive mode).





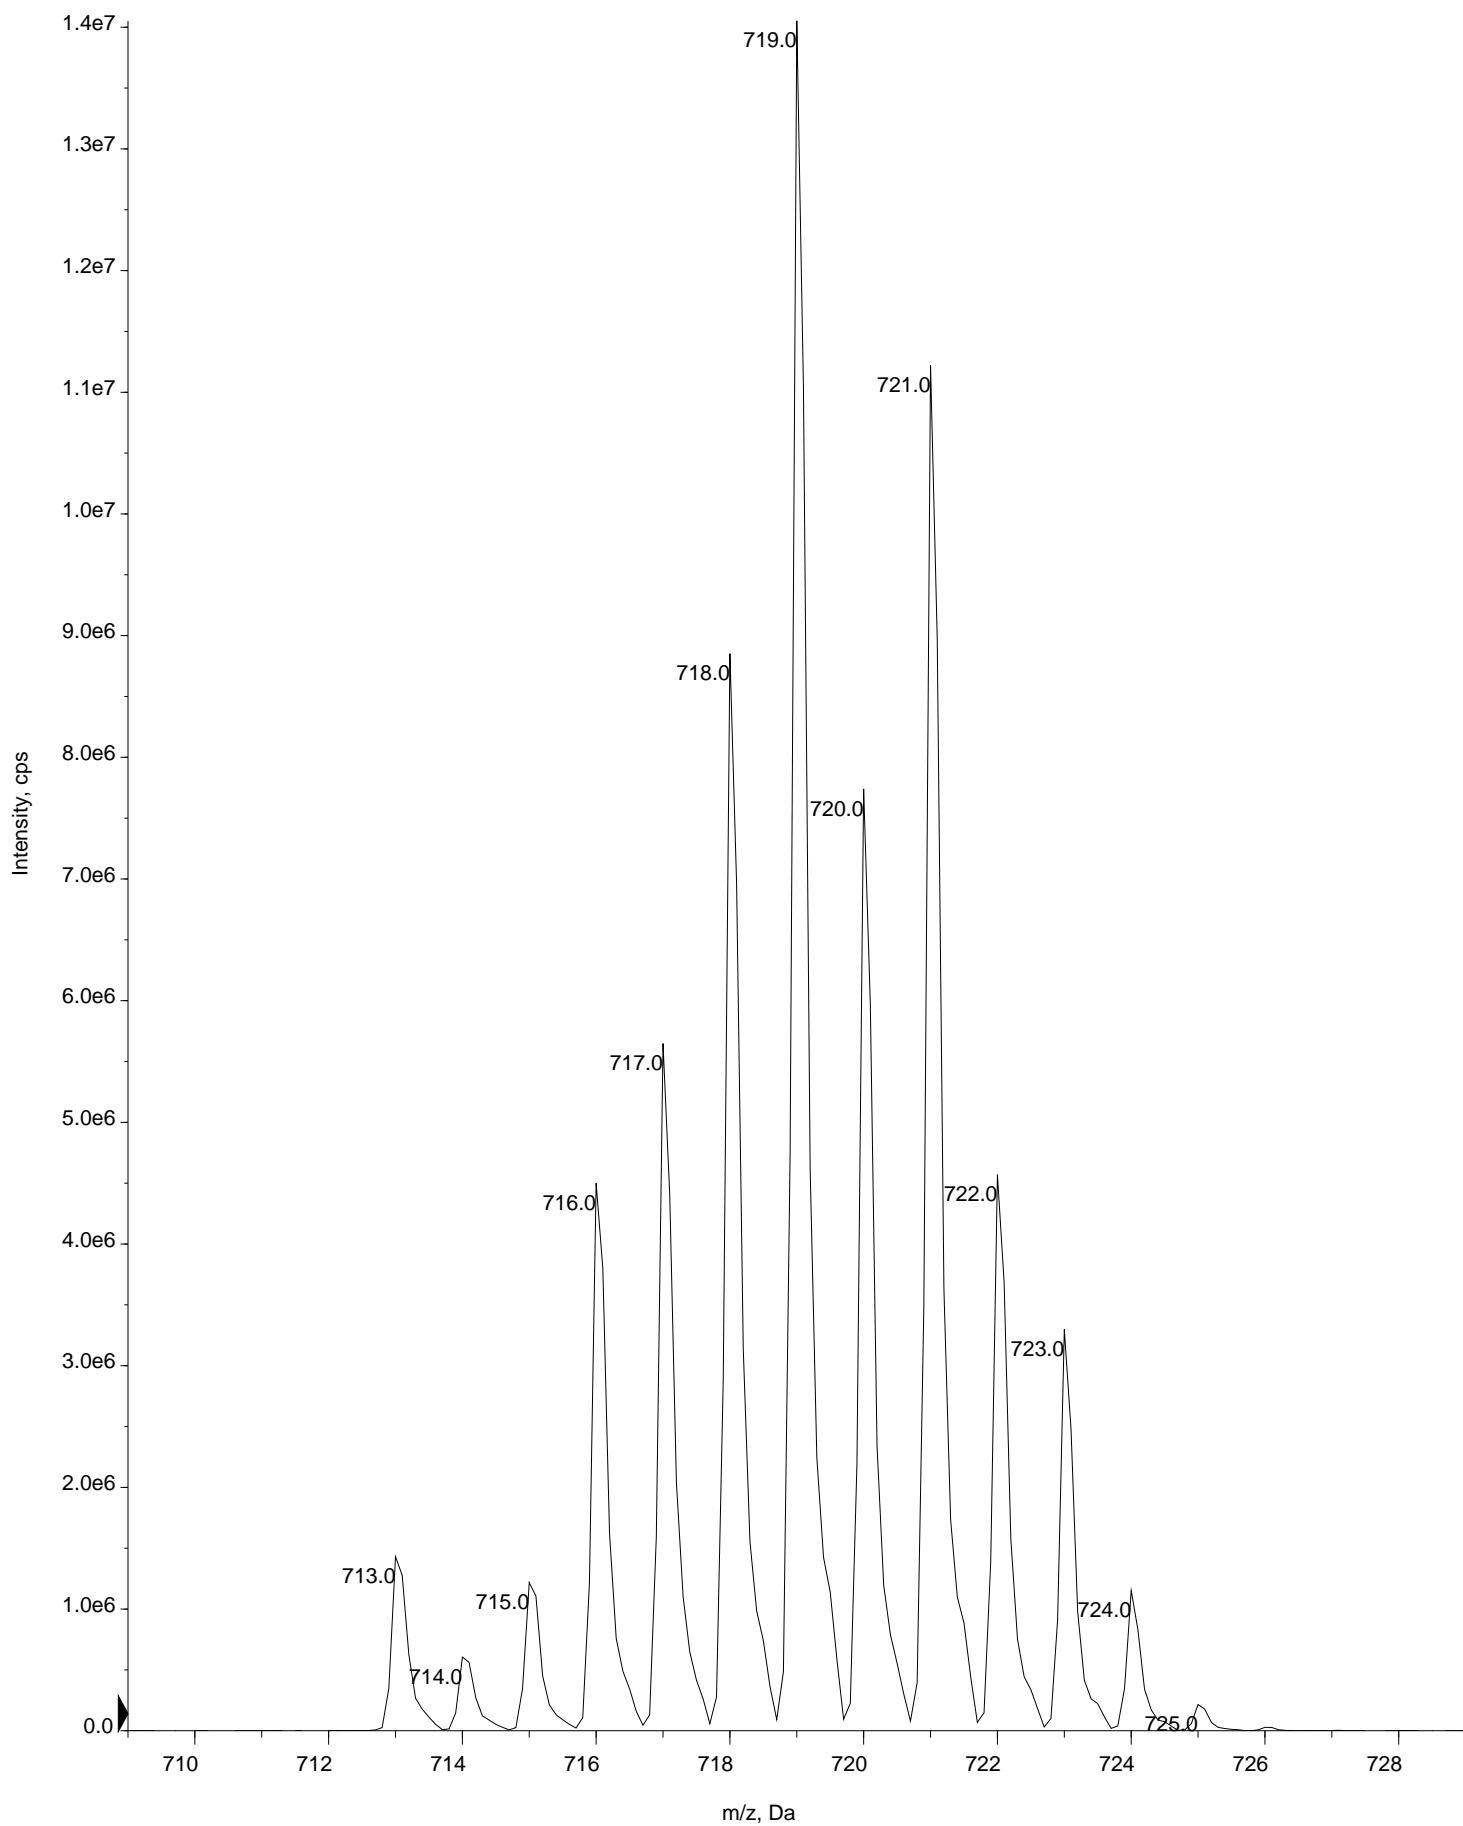

Figure S84. Experimental ESI mass spectrum of  $[8]^+$  in methanol (positive mode).

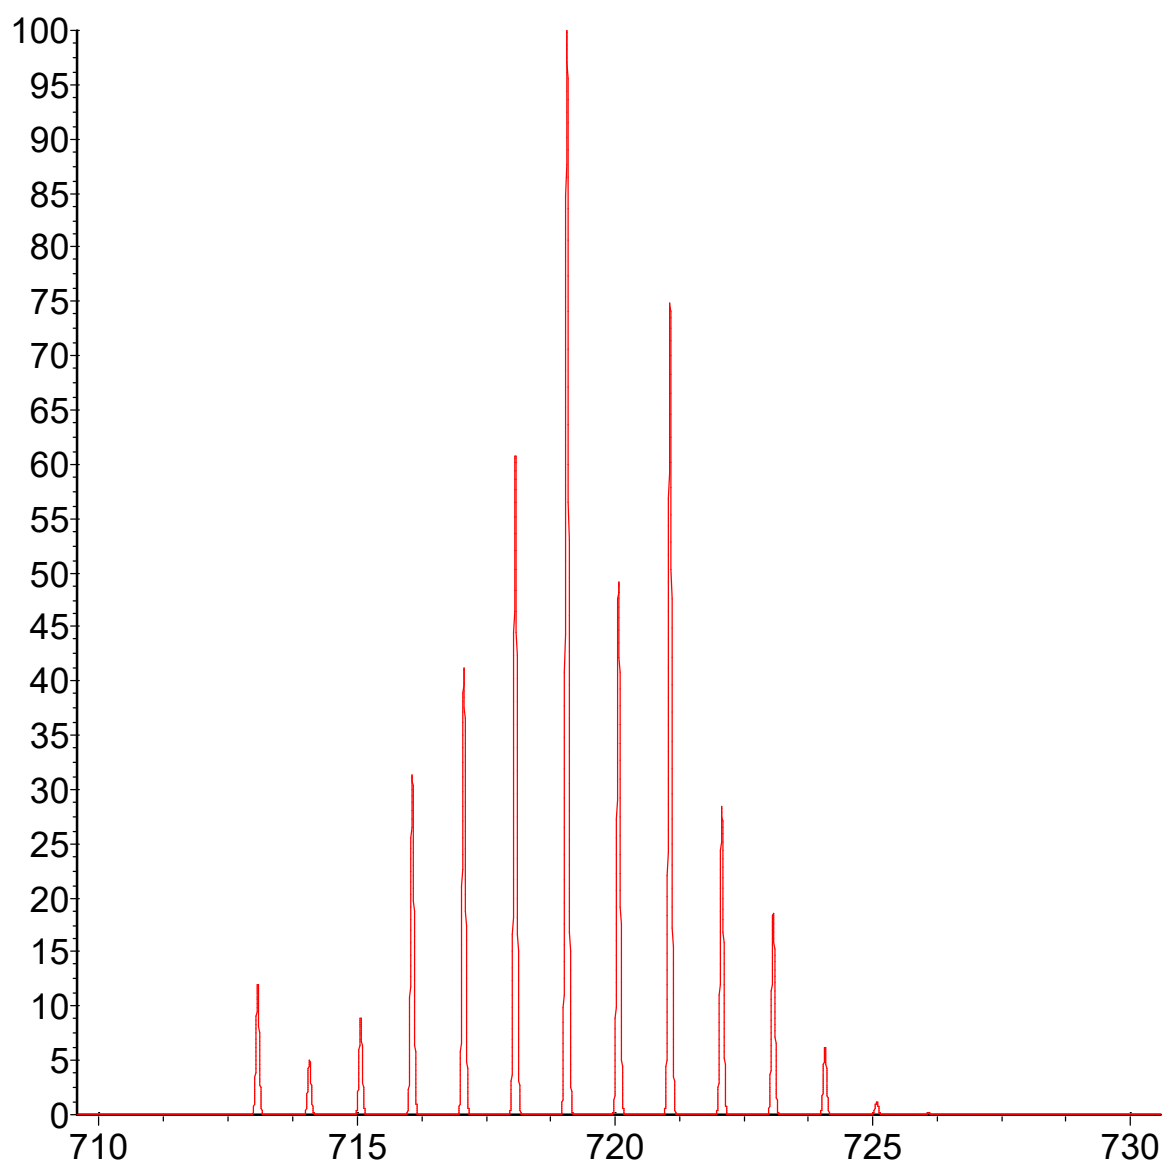

Figure S85. Simulated isotopic distribution pattern of  $[8]^+$ .
